# Supplementary material for: Nutrient Inputs to the Laurentian Great Lakes by Source and Watershed Estimated Using SPARROW Watershed Models
Source: PubMed Central journal article supplement (PMC3307632; doi:10.1111/j.1752-1688.2011.00574.x), 2011-10
Supplement: jawr0047-1011-SD1.pdf [file jawr0047-1011-SD1.pdf]

# **Nutrient Inputs to the Laurentian Great Lakes by Source and Watershed Estimated Using SPARROW Watershed Models**

**By  
Dale M. Robertson and David A. Saad**

## **Supporting Information:**

Robertson and Saad, 2011, Nutrient Inputs to the Laurentian Great Lakes  
By Source and River Basin Estimated Using SPARROW Watershed Models, *This Issue*.

## **There are eight parts to this Supporting Information**

- S1. A description of the SPATIally Referenced Regression On Watershed attributes (SPARROW) model.
- S2. Data Requirements/Specifications used in the Major River Basin number 3 (MRB3) SPARROW models (Table S1).
- S3. Summary of measured (with Fluxmaster) and estimated (with SPARROW) loads for each monitoring site used in the calibration of the SPARROW models, with a summary of the data used to estimate the measured loads (Table S2).
- S4. Description of the SPARROW input data.
- S5. Figures demonstrating SPARROW model calibration for total phosphorus (TP) and total nitrogen (TN).
- S6. Output from the MRB3 TP and TN SPARROW models for:
  - Loads and yields each Great Lake and nearby large river basin (Tables S3 and S4);
  - Loads and yield for and each HUC8 (Tables S5\_TP and S5\_TN);
  - Loads and yield for each tributary > 150 km<sup>2</sup> to each Great Lake (Tables S6\_TP and S6\_TN). Tributaries to each Great Lake are ranked by relative loads and yields.
- S7. Comparison of the yields and relative sources of P and N among Great Lakes watersheds with those from the Upper Mississippi River, Ohio River, and Red River watersheds.
- S8. References for Supporting Information.

## S1. Description of the SPARROW model

SPARROW is a GIS-based watershed model that uses a mass-balance approach to estimate nutrient sources, transport, and transformation in terrestrial and aquatic ecosystems of watersheds under long-term steady-state conditions (Smith *et al.*, 1997; Alexander *et al.*, 2008). SPARROW includes non-conservative transport, mass-balance constraints, and water flowpaths defined by topography, streams, and reservoirs, based on a stream-reach network with delineated reach catchments. The model-estimated flux leaving each reach ( $i$ ) in SPARROW,  $F_i^*$ , is given by

$$F_i^* = \left( \sum_{j \in J(i)} F_j' \right) \delta_i T(\mathbf{Z}_i^S, \mathbf{Z}_i^R; \boldsymbol{\theta}_S, \boldsymbol{\theta}_R) + \left( \sum_{n=1}^{N_S} S_{n,i} \alpha_n D_n(\mathbf{Z}_i^D; \boldsymbol{\theta}_D) \right) T'(\mathbf{Z}_i^S, \mathbf{Z}_i^R; \boldsymbol{\theta}_S, \boldsymbol{\theta}_R). \quad (\text{S1})$$

The first summation term represents the flux ( $F_j^*$ ) from all upstream confluent reaches  $J(i)$  that are delivered downstream to reach  $i$ .  $\delta_i$  is the fraction of upstream flux delivered to reach  $i$ ;  $\delta_i$  generally equals 1 unless the upstream end of reach  $i$  is the location of a diversion.  $T(\cdot)$  is the stream transport function representing attenuation processes acting on the flux as it travels along the reach pathway (instream loss). This function defines the fraction of the flux entering reach  $i$  at the upstream node that is delivered to the reach's downstream node. The factor is a function of measured stream and reservoir characteristics, denoted by the vectors  $\mathbf{Z}^S$  and  $\mathbf{Z}^R$ , with corresponding coefficient vectors  $\boldsymbol{\theta}_S$  and  $\boldsymbol{\theta}_R$ .

The second summation term represents the incremental flux (that introduced to the stream network in reach  $i$ ). This term is composed of the flux originating from specific sources, indexed by  $n = 1, \dots, N_S$ . Associated with each source is a source variable, denoted  $S_n$ . Depending on the nature of the source, this variable could represent the mass of the source available for transport to streams, or it could be the area of a particular land use. The variable  $\alpha_n$  is a source-specific

coefficient that converts source variable units to flux units. The function  $D_n(\cdot)$  represents the land-to-water delivery factor. For sources associated with the landscape, this function along with the source-specific coefficient determines the amount of a constituent delivered to streams. The land-to-water delivery factor is a source-specific function of a vector of delivery variables, denoted by  $\mathbf{Z}_i^D$ , and an associated vector of coefficients  $\boldsymbol{\theta}_D$ . The last term in the equation, function  $T'(\cdot)$ , represents the fraction of flux originating in and delivered to downstream end of reach  $i$ . This term is similar in form to the stream delivery factor defined in the first summation term but is used to transport flux only from the midpoint of the reach to the outlet.

Parameter coefficients associated with the sources, land-to-water delivery factors, and instream- and reservoir-loss terms were statistically estimated using weighted nonlinear least squares regression, based on calibrations with long-term mean annual normalized loads at each monitored station throughout the study area. A more indepth description of the SPARROW model and its calibration is given in Schwarz *et al.* (2006).

## S2. Data requirements/specifications used in the MRB3 SPARROW models

Table S1. Data requirements and specifications for data used in the MRB3 SPARROW models.

*Supplemental Material to Robertson and Saad, 2011, Journal of the American Water Resources Association, Nutrient Inputs to the Laurentian Great Lakes By Source and River Basin Estimated Using SPARROW Watershed Models.*

| Category                                                                                      | Requirements/Specifications                                                                                                                                                             |
|-----------------------------------------------------------------------------------------------|-----------------------------------------------------------------------------------------------------------------------------------------------------------------------------------------|
| <b>Water-quality sites</b>                                                                    |                                                                                                                                                                                         |
| Time period for data                                                                          | 10/1/1970 - 9/30/2007                                                                                                                                                                   |
| Time period covered by water-quality data                                                     | > 2 years                                                                                                                                                                               |
| Data near 2002 base year                                                                      | Data within 2 years of 2002 if < 5 years of data; data within 7 years of 2002 if > 5 years of data                                                                                      |
| Total number of samples                                                                       | >25 samples                                                                                                                                                                             |
| Total number of uncensored sample values                                                      | >25 samples                                                                                                                                                                             |
| Total samples in each of four seasons                                                         | >1 sample for each season (winter: Dec.-Feb.; spring: Mar.-May; summer: June-Aug.; fall: Sept.-Nov.)                                                                                    |
| Location of site                                                                              | On enhanced RF1 stream coverage                                                                                                                                                         |
| <b>Coinciding stream gage</b>                                                                 |                                                                                                                                                                                         |
| Time period for data                                                                          | 10/1/1970 - 9/30/2006                                                                                                                                                                   |
| Water quality and flow data overlap                                                           | > 2 years                                                                                                                                                                               |
| Drainage area ratio between water quality site and gaged site                                 | 0.5 - 2.0                                                                                                                                                                               |
| Proximity between water quality site and gaged site                                           | < 40 km                                                                                                                                                                                 |
| Proximity between water quality site and gaged site for large streams (>260 km <sup>2</sup> ) | Must be on the same stream network                                                                                                                                                      |
| <b>Load Computations</b>                                                                      |                                                                                                                                                                                         |
| Program for load computation                                                                  | Fluxmaster (Schwarz et al. 2006)                                                                                                                                                        |
| Variables included in Fluxmaster                                                              | logarithm of flow, sine, cosine, decimal time                                                                                                                                           |
| Time period of data used in Fluxmaster calibration                                            | 10/1/1970 - 9/30/2007                                                                                                                                                                   |
| Time period for load computation                                                              | 10/1/1970 - 9/30/2006                                                                                                                                                                   |
| Annual load computation period                                                                | Water year 10/1 - 9/30                                                                                                                                                                  |
| Detrended to which year (base year)                                                           | 2002                                                                                                                                                                                    |
| <b>Point Sources</b>                                                                          |                                                                                                                                                                                         |
| Point sources not included for the following Standard Industrial Classification (SIC) codes   | 1389- Oil and gas injection wells; 3312, 3479, 3339 - Steel; and 4961- steam.                                                                                                           |
| <b>Model Calibration and Accumulation Procedures</b>                                          |                                                                                                                                                                                         |
| SPARROW version                                                                               | V2_9                                                                                                                                                                                    |
| Coefficient Estimation                                                                        | Nonlinear least square regression (NLLSR)                                                                                                                                               |
| Confidence limits on coefficients                                                             | Compute coefficients with NLLSR followed by application of Make_coef_ci.sas code.                                                                                                       |
| Robustness of coefficients                                                                    | 200 nonparametric bootstrap iterations                                                                                                                                                  |
| Accumulation at a HUC8 scale                                                                  | Not corrected for biases. Accumulated with Custom_predict_accumulator.sas; Confidence intervals computed with Sparrow_custom_predict.sas using 200 iterations of parametric bootstraps. |
| Accumulation for all tributaries > 150 km <sup>2</sup>                                        | Corrected for biases. Accumulated with Custom_predict_accumulator.sas; Confidence intervals computed with Sparrow_custom_predict.sas using 200 iterations of parametric bootstraps.     |
| Accumulation for each Great Lake                                                              | Corrected for biases. Accumulated with Custom_predict_accumulator.sas; Confidence intervals computed with Sparrow_custom_predict.sas using 200 iterations of parametric bootstraps.     |

### **S3. Summary of measured (with Fluxmaster) and estimated (with SPARROW) loads for each monitored site**

In Tables S2\_TP and S2\_TN (attached to the end of the Supporting information), we provide a summary of measured (with Fluxmaster) and estimated (with SPARROW) loads for each monitoring site used in the calibration of the SPARROW models. In this table we also provide a summary of the location of each of the sites and the concentration data used to estimate the loads with Fluxmaster.

For each of the sites, there is a description of its location and the concentration data used in Fluxmaster. For each site, midmonthly mean and median concentrations for each site were calculated using a subset of the data. The subset included only samples collected closest to the middle of the month for sites at which more than one sample per month was collected. This was done to reduce possible bias associated with the frequency of sampling at different sites (such as weekly or storm sampling events compared to the more common monthly or less than monthly sampling).

The long-term mean annual nutrient loads for each monitored site were computed with the rating curve/regression procedure in the Fluxmaster computer program (Schwarz *et al.*, 2006). This procedure combines water-quality data at a monitoring station with daily flow values to provide more accurate load estimates than can be obtained by using individual water-quality measurements alone. TP and TN loads were determined with log-linear water-quality regression models that related the logarithm of constituent concentration to the logarithm of daily flow, decimal time (to compensate for trends), and season of the year (expressed using trigonometric functions of the fraction of the year). Regression models were fit to data from each potential load site (sites with  $\geq 25$  samples and corresponding long-term flow data, see Saad *et al.*, 2011 [this issue] for a more complete description).

#### **4. Description of SPARROW input data**

Water flowpaths used in the SPARROW models were defined by streams and reservoirs included in the enhanced stream-reach file 1 (RF1; 1:500,000 scale) with incremental reach catchments delineated with 100-m digital elevation models (Brakebill *et al.*, 2011; this issue). The catchments were used to allocate spatial data on nutrient sources and landscape and aquatic characteristics to each reach (Wieczorek and Lamotte, 2011) Unless otherwise noted all spatial data in this paper are from this source).

#### ***Nutrient inputs***

##### **Nitrogen from atmospheric deposition**

The atmospheric deposition estimates used as input to SPARROW are based on the use of wet deposition measurements at National Atmospheric Deposition Program (NADP) sites as a proxy for total (wet plus dry) inorganic nitrogen deposition. SPARROW estimates of the quantities of nitrogen deposition delivered to streams is expected to account for additional contributions from dry nitrogen deposition forms because the regional patterns of wet and dry deposition are generally correlated over large areas of the U.S. (Holland et al. 2005; Baumgardner et al. 2002). The SPARROW estimates of atmospheric nitrogen contributions to streams would also be expected to primarily reflect *regional* atmospheric nitrogen sources, given that NADP wet-deposition estimates generally reflect regional NO<sub>x</sub> emissions from stationary sources (Elliott et al., 2007). Local atmospheric nitrogen sources, such as those associated with vehicle emissions, are likely to be included in the SPARROW estimates of the nitrogen contributions from other modeled sources, especially urban sources (e.g., developed or impervious land). Data were compiled from a 1-km grid constructed from the original data (J. Gronberg, USGS, written commun., 2005). These data were derived from long-term mean annual measurements (1990 to 2005) at 186 stations in the U.S. Estimates were normalized to the

base year 2002. Inputs were generally highest through the center of the MRB3 study area and lowest in extreme north and southeast parts (Figure S1).

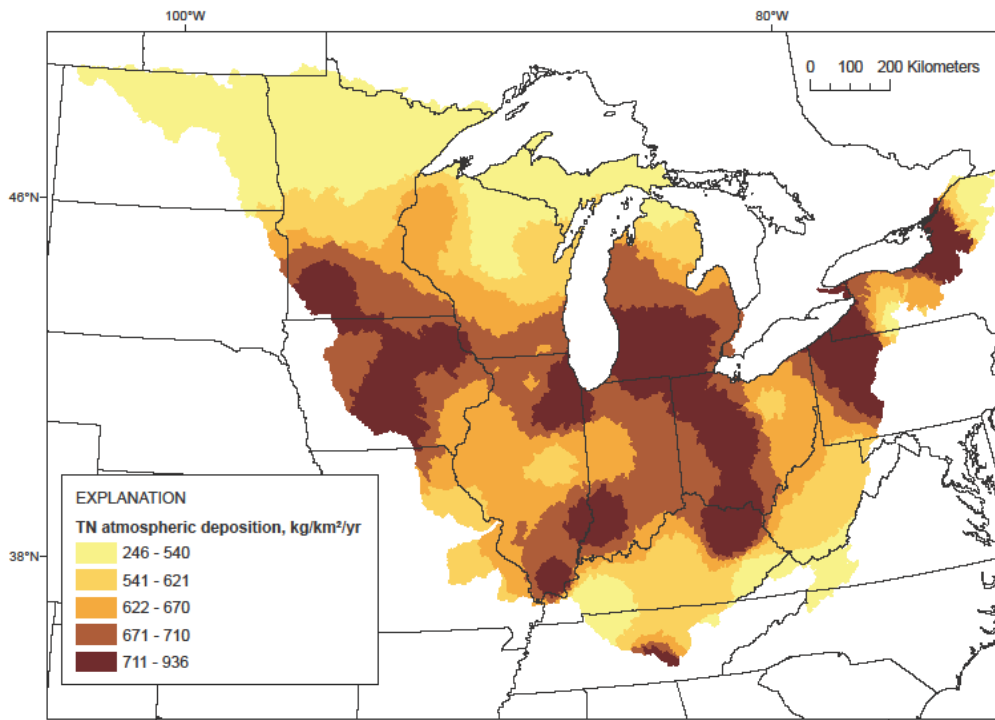

**Figure S1.** Atmospheric wet deposition rates for 2002 by SPARROW catchment, in kg/km<sup>2</sup>. Intervals represent five equal quantiles (0-20%, 20-40%, 40-60%, 60-80%, 80-100%).

### Point sources

Inputs from point sources (including sewerage treatment, commercial, and industrial effluent) were estimated by Maupin and Ivahnenko (2011; *this issue*) from data in the USEPA's PCS database supplemented with data obtained directly from the states of Wisconsin and Minnesota (J. Schmidt, Wisconsin Department of Natural Resources, and S. Weiss, Minnesota Pollution Control Agency, written commun., 2007). TP and TN effluent loads were computed for each point source location using methods and procedures described by McMahon *et al.* (2007) and Hoos *et al.* (2008). For MRB3 SPARROW models, inputs from the following oil and gas, steel, and stream Standard Industrial Classifications (SIC) were excluded: 1389, 3312, 3339,

3479, and 4961. The point source load estimates used in the model calibration were based on estimates for 2002. If the 2002 data were missing and 1997 data were available, then data from 1997 were used. If both 2002 and 1997 data were missing and 1992 were available, then 1992 data were used. The distribution of point source inputs of P and N were quite variable, but largest inputs were concentrated around major urban areas (Figure S2).



A.

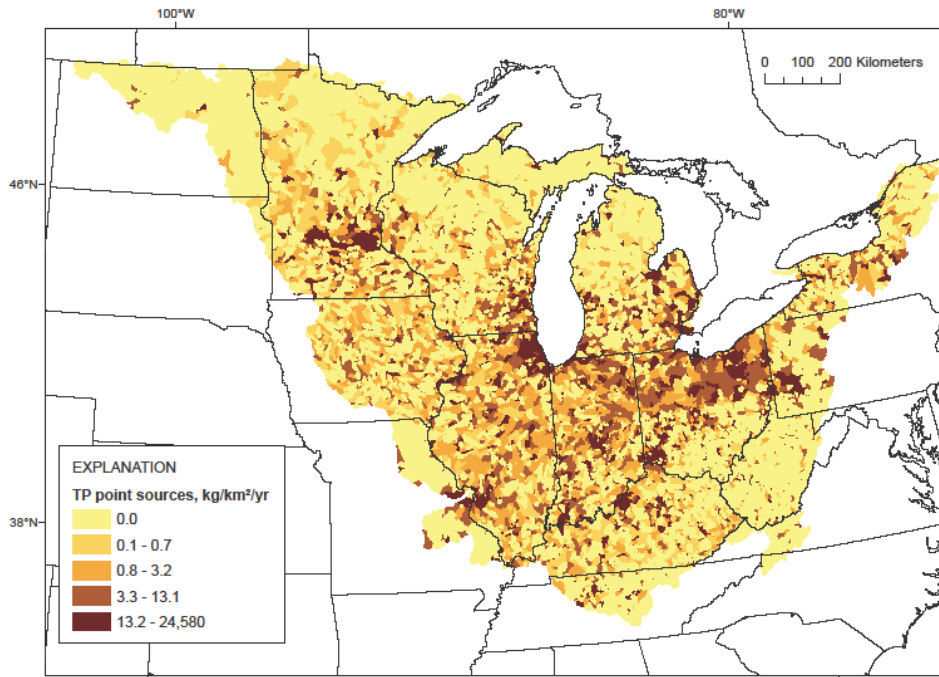

B.

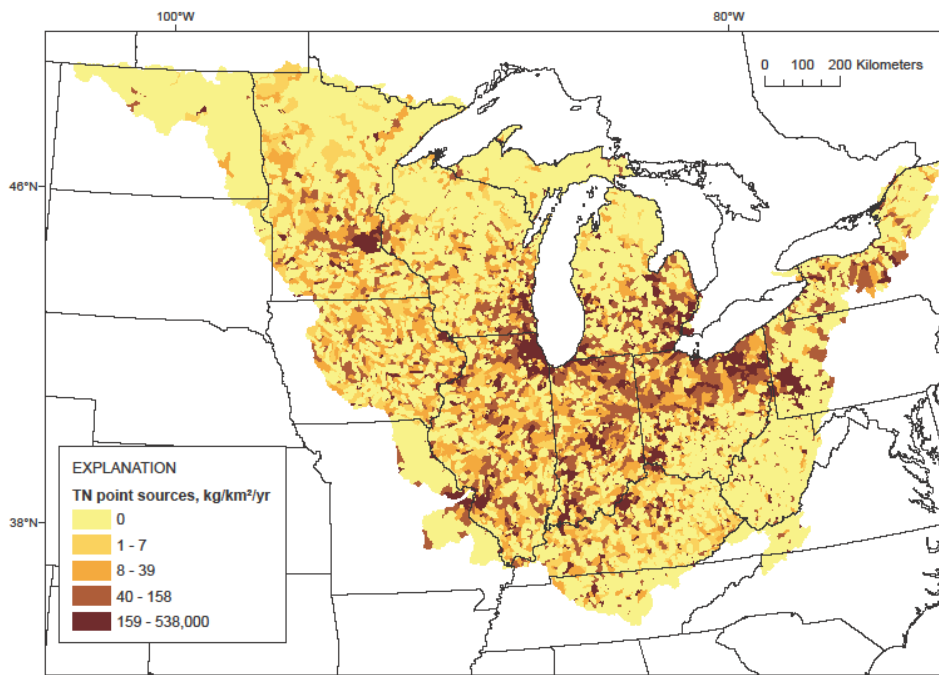

**Figure S2.** Point source input rates for TP (A) and TN (B) for 2002 by SPARROW catchment, in kg/km<sup>2</sup>. Intervals represent five equal quantiles (0-20%, 20-40%, 40-60%, 60-80%, 80-100%).

### **Nutrients from farm fertilizer**

Fertilizer inputs are based on county-level estimates from Ruddy *et al.* (2006). The P and N inputs from farm fertilizers were derived from 2002 county sales aggregated by state and allocated back to the individual counties based on their respective fertilizer expenditures (Association of American Plant Food Control Officials and the U.S. Census of Agriculture). The county data were then allocated to each SPARROW stream catchment by the fraction of the catchment's agricultural land. Farm N and P fertilizer inputs had the same pattern, and inputs were highest in the central and western parts of MRB3 (Figure S3). Generally, N inputs were about an order of magnitude greater than P inputs.

A.

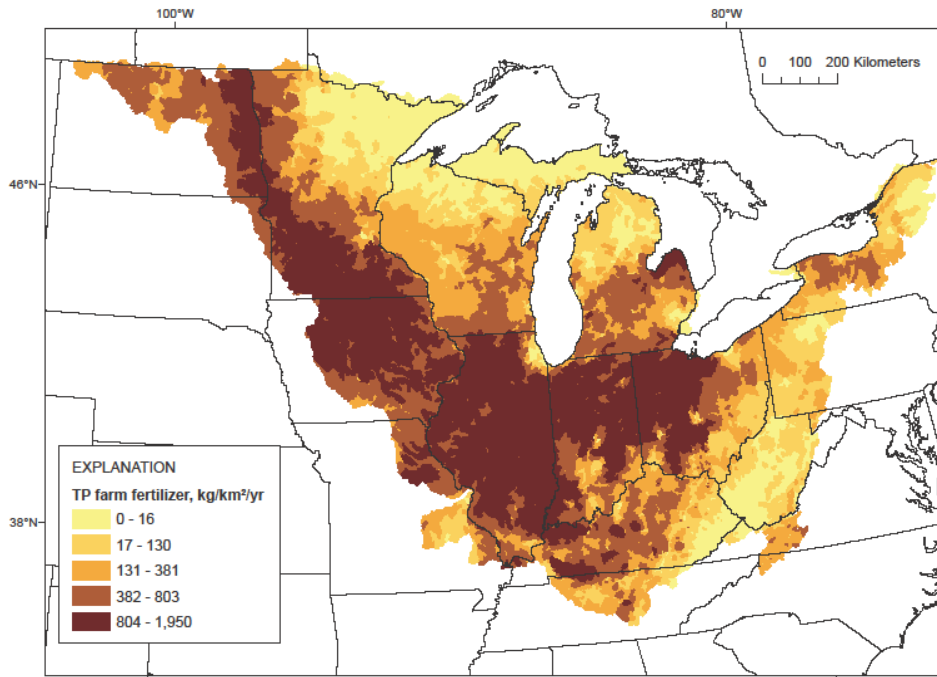

B.

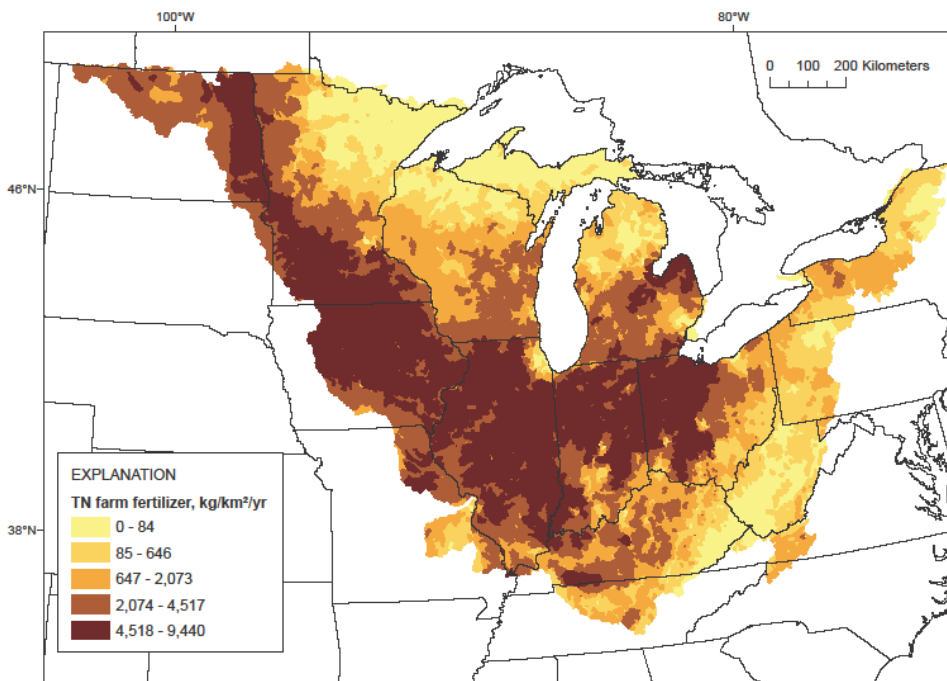

**Figure S3.** Fertilizer input rates for TP (A) and TN (B) for 2002 by SPARROW catchment, in kg/km<sup>2</sup>. Intervals represent five equal quantiles (0-20%, 20-40%, 40-60%, 60-80%, 80-100%).

### **Nutrients from confined and unconfined manure**

Manure inputs are based on county-level estimates of animal wastes from Ruddy *et al.* (2006). Nutrients associated with livestock wastes reflect contributions from the excreted wastes of *unconfined* animals on farms, pastures, and rangelands and from the excreted wastes of *confined* animals, including those in concentrated animal feeding operations. Confined animal wastes include recoverable manure that may be applied to nearby farmlands as well as unrecoverable manure that is lost during the collection, storage, and treatment of the waste. Manure inputs were derived from 2002 county livestock population data from the U.S. Census of Agriculture using species specific rates. The county data were then allocated to each SPARROW stream catchment by the fraction of the catchment's agricultural land and grasslands. Highest confined manure input rates for P occurred in southern Minnesota, Iowa, southwestern Wisconsin, and northern Indiana, whereas highest unconfined manure input rates for P occurred in eastern Iowa, western Kentucky, and Tennessee (Figure S4). The distribution of confined manure input rates for N is similar to that for P, highest inputs occurred in southern Minnesota, Iowa, southwestern Wisconsin, and northern Indiana (Figure S5).

A.

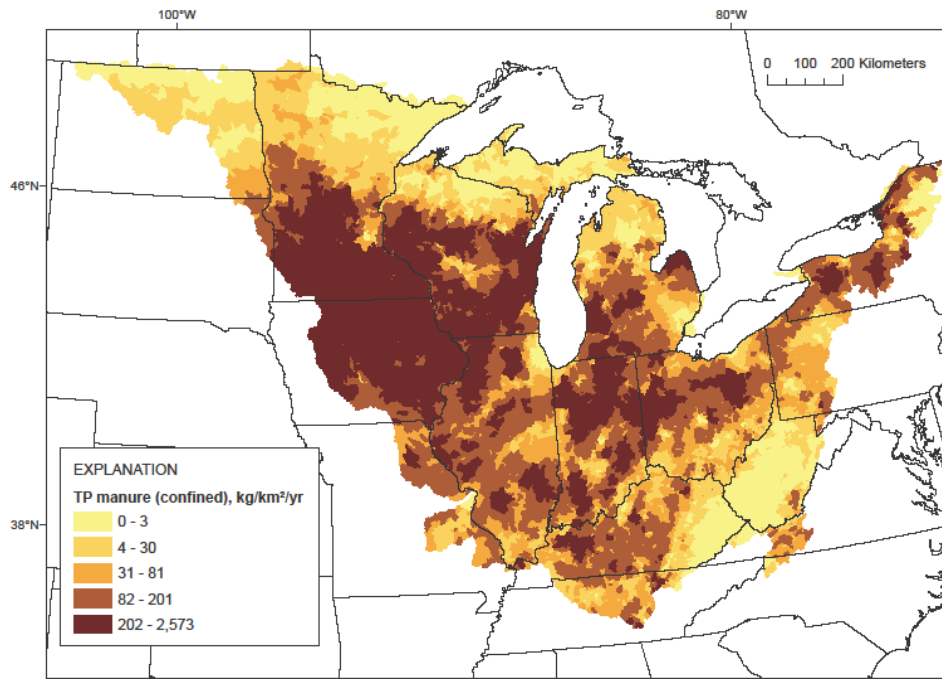

B.

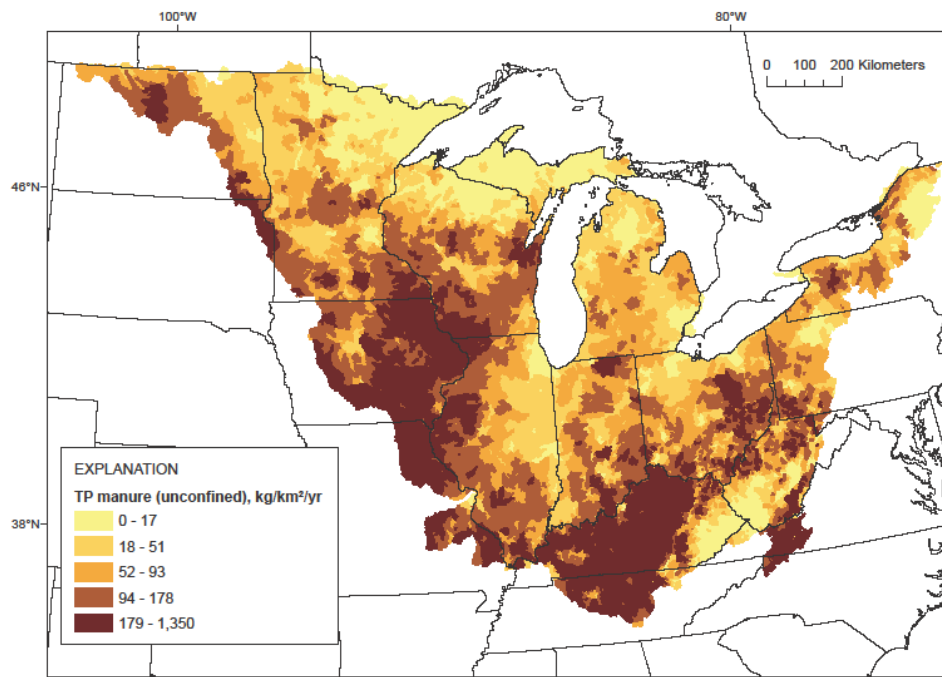

**Figure S4.** Manure input rates for TP for confined animals (A) and unconfined animals (B) for 2002 by SPARROW catchment, in kg/km<sup>2</sup>. Intervals represent five equal quantiles (0-20%, 20-40%, 40-60%, 60-80%, 80-100%).

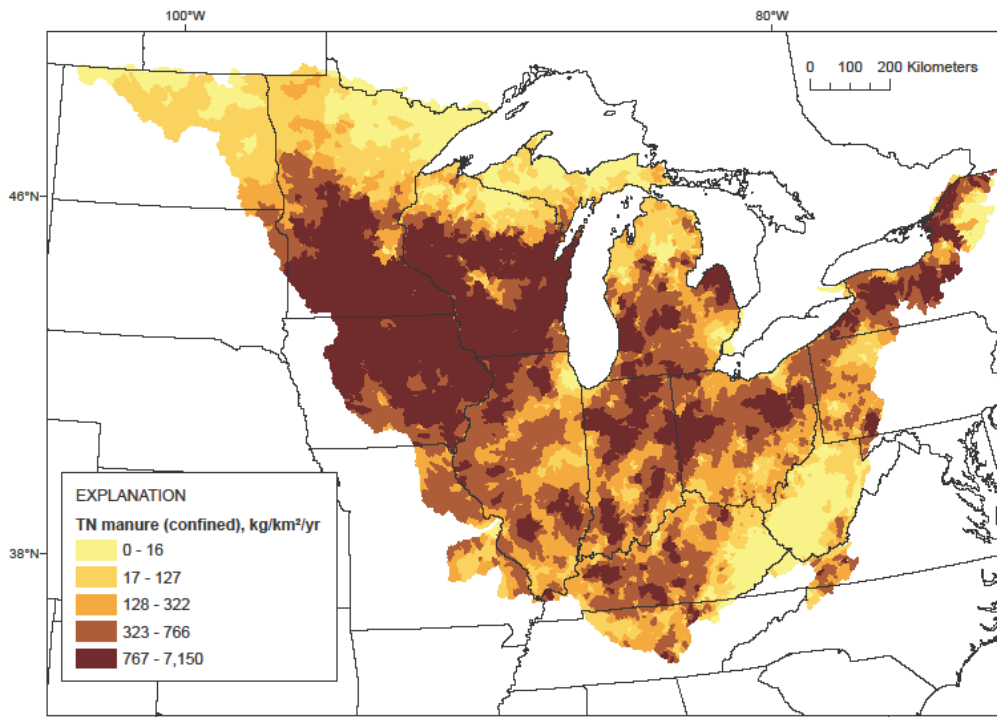

**Figure S5.** Manure input rates for TN for confined animals for 2002 by SPARROW catchment, in kg/km<sup>2</sup>. Intervals represent five equal quantiles (0-20%, 20-40%, 40-60%, 60-80%, 80-100%).

### Inputs from specific land-use/land-cover types

Land-use/land-cover related inputs (additional agricultural inputs from cultivated agricultural areas, urban inputs from urban and open areas, and natural inputs from forested areas) were based on the respective amount of area in each of these land types based on 2001 National Land Cover Data (USGS, 2000). The area consists primarily of forested areas in north and southeast, and agricultural areas in the west and central areas. Several major metropolitan areas are in the basin, such as Chicago, IL, Detroit MI, and Cleveland, OH (Figure S6).

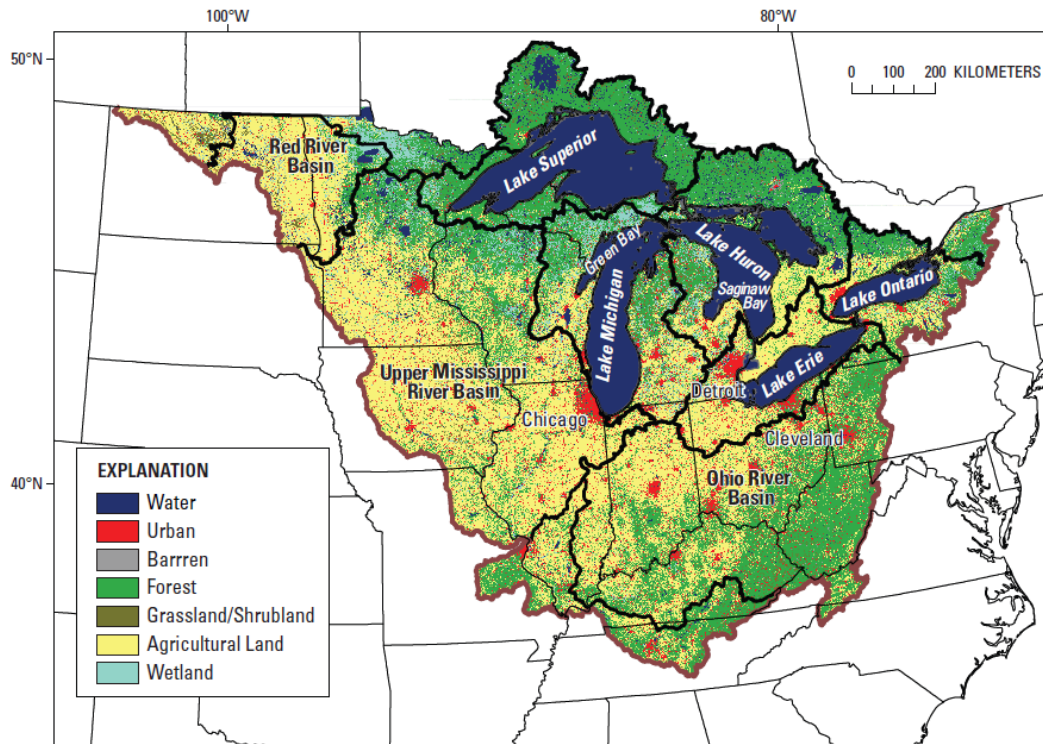

**Figure S6.** Land use and land cover across the Great Lakes Basin with selected metropolitan centers identified (U.S. drainage, U.S. Geological Survey, 2000; Canadian drainage, Geobase, 2009).

## *Environmental-setting information*

### **Soil permeability**

Average soil permeability was compiled from the STATSGO database (U.S. Department of Agriculture; <http://water.usgs.gov/GIS/metadata/usgswrd/XML/muid.xml> accessed July 2009) using methods described by Wolock (1997). Soils with relatively high permeability are in the northern part of MRB3 (eastern Minnesota, Wisconsin, and Michigan) and soils with relatively poor permeability are in the south central part of MB3 (Figure S7).

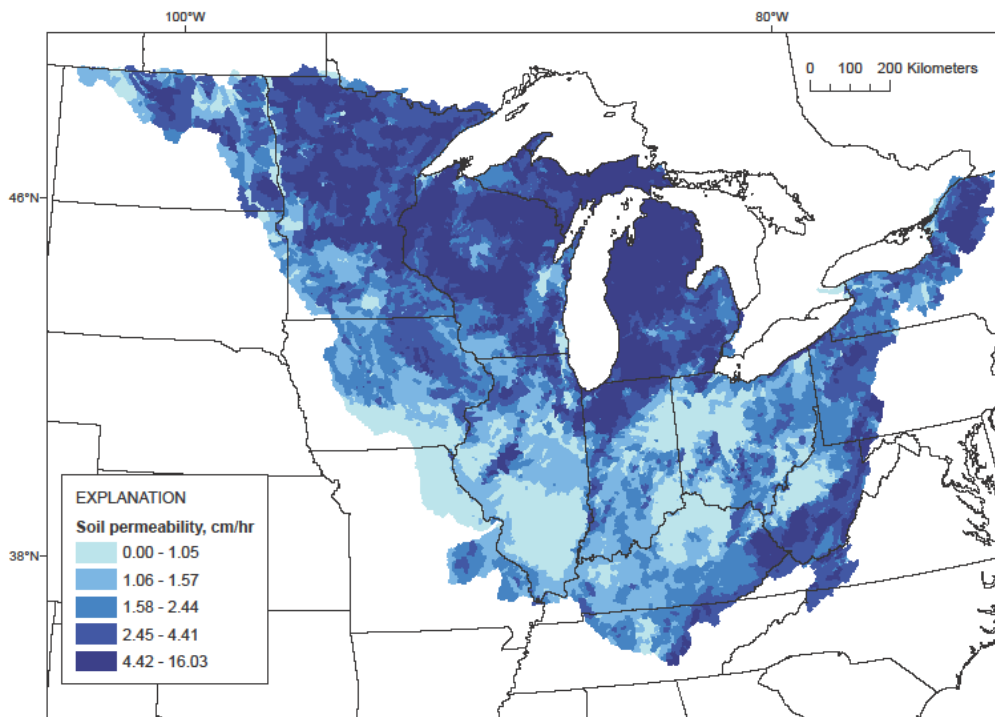

**Figure S7.** Average soil permeability for MRB3, by SPARROW catchment. Intervals represent five equal quantiles (0-20%, 20-40%, 40-60%, 60-80%, 80-100%).



### Areas of tile drainage

Tile drain information was derived from the 1997 National Resources Inventory dataset compiled by the National Resource Conservation Service. The distribution of tile drains is inversely related to the permeability of the soil. The highest percentage of land with tile drains is found in the central part of MRB3 (southern Minnesota, Iowa, southeastern Wisconsin, central Illinois, southern Michigan northern Indiana, and northern Ohio), where the soils are least permeable (Figure S8).

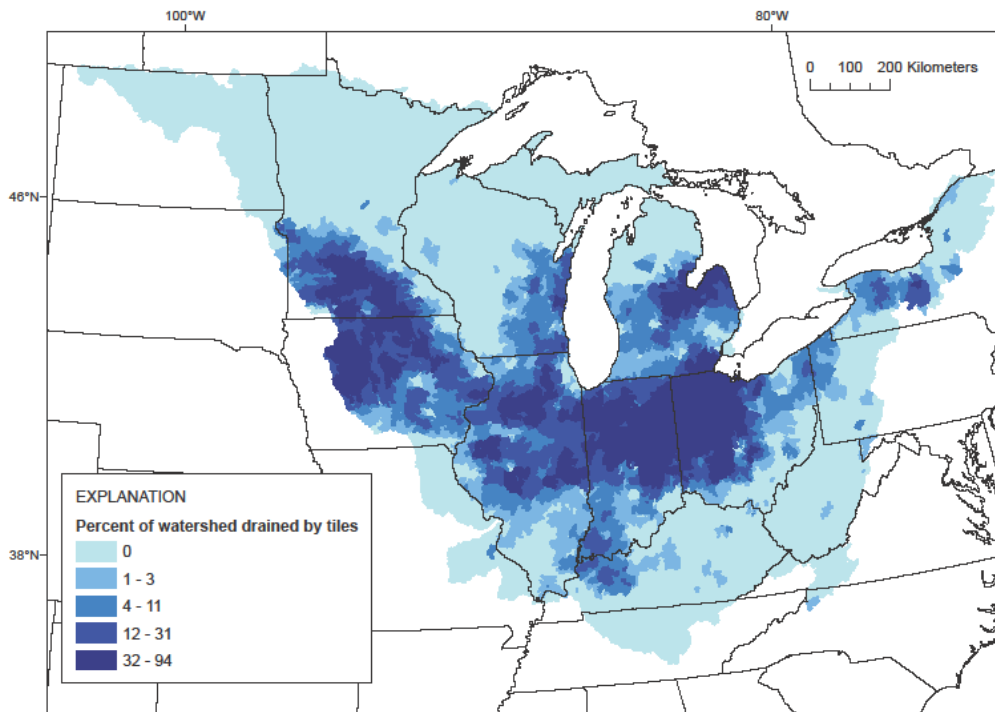

**Figure S8.** Percentage of the area drained by tiles for MRB3, by SPARROW catchment. Intervals represent five equal quantiles (0-20%, 20-40%, 40-60%, 60-80%, 80-100%).

## Drainage density

The drainage density of each catchment was calculated as the total length of all stream reaches in a catchment divided by its area. Stream reaches were obtained from the enhanced stream-reach file 1 (RF1; 1:500,000 scale) (Brakebill *et al.*, 2011; this issue). The highest drainage density is in the southeast part of MRB3, which was partly caused by the increased precipitation in this area and the increased resolution in the enhanced RF1 coverage. Lowest drainage densities are in the northwest part of MRB3.

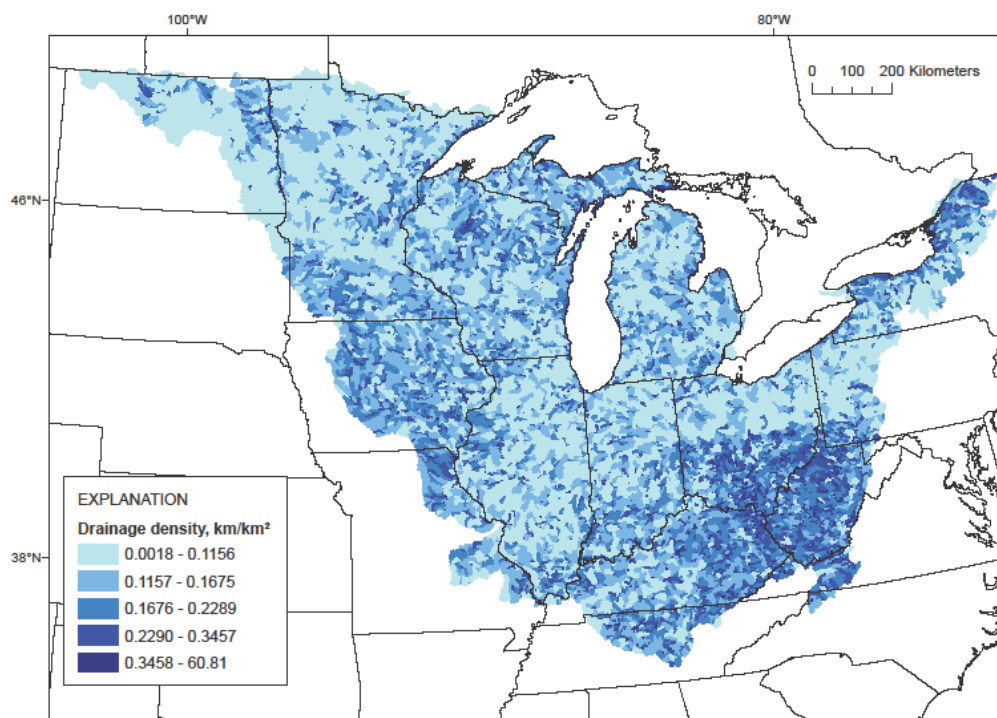

**Figure S9.** Drainage density (summed length of all stream reaches in each catchment divided by its area) for MRB3, by SPARROW catchment. Intervals represent five equal quantiles (0-20%, 20-40%, 40-60%, 60-80%, 80-100%).

## Precipitation

Mean annual precipitation represent the average annual values over 30 years (1971 to 2000), and was obtained from the Parameter-elevation Regressions on Independent Slopes Model (PRISM) digital data network (<http://www.prism.oregonstate.edu/>). These data show a strong northwest to southeast gradient of increasing mean precipitation (Figure S10). Mean annual precipitation ranges from 380 to 1,700 mm.

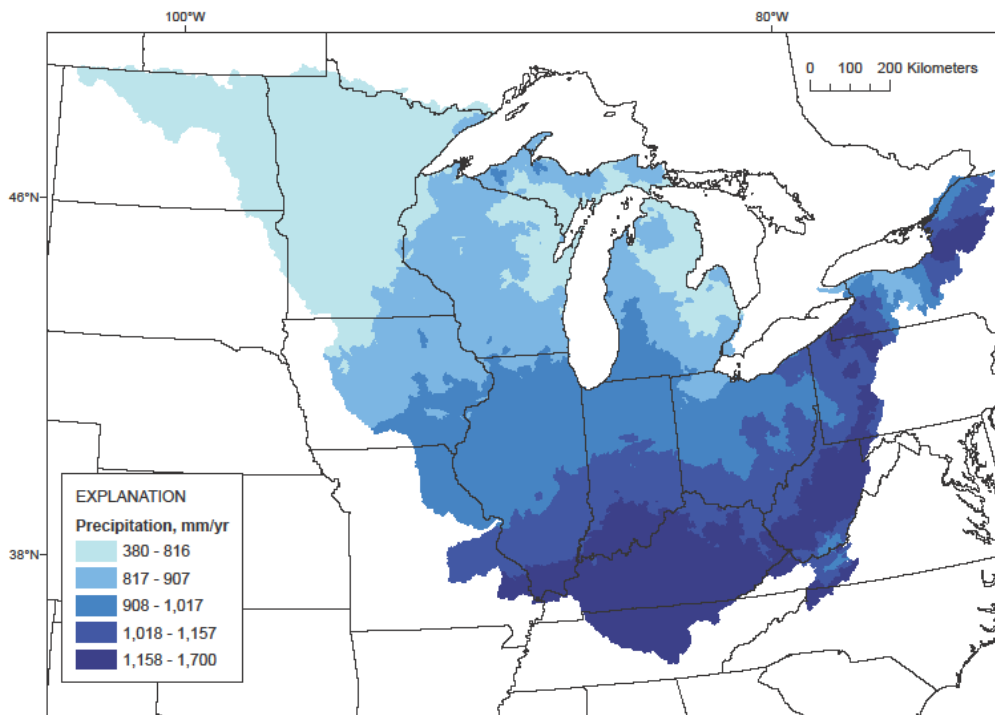

**Figure S10.** Mean annual precipitation (30 year average from 1971–2000) for MRB3, by SPARROW catchment. Intervals represent five equal quantiles (0-20%, 20-40%, 40-60%, 60-80%, 80-100%).

## Air temperature

Air temperature data, averaged from minimum and maximum daily temperature values over 30 years (1971 to 2000), were obtained from the Parameter-elevation Regressions on Independent Slopes Model (PRISM) digital data network (<http://www.prism.oregonstate.edu/>). These data show a strong north to south gradient of increasing mean air temperature (Figure S11). Mean air temperatures range from 2.3 to 14.9 C.

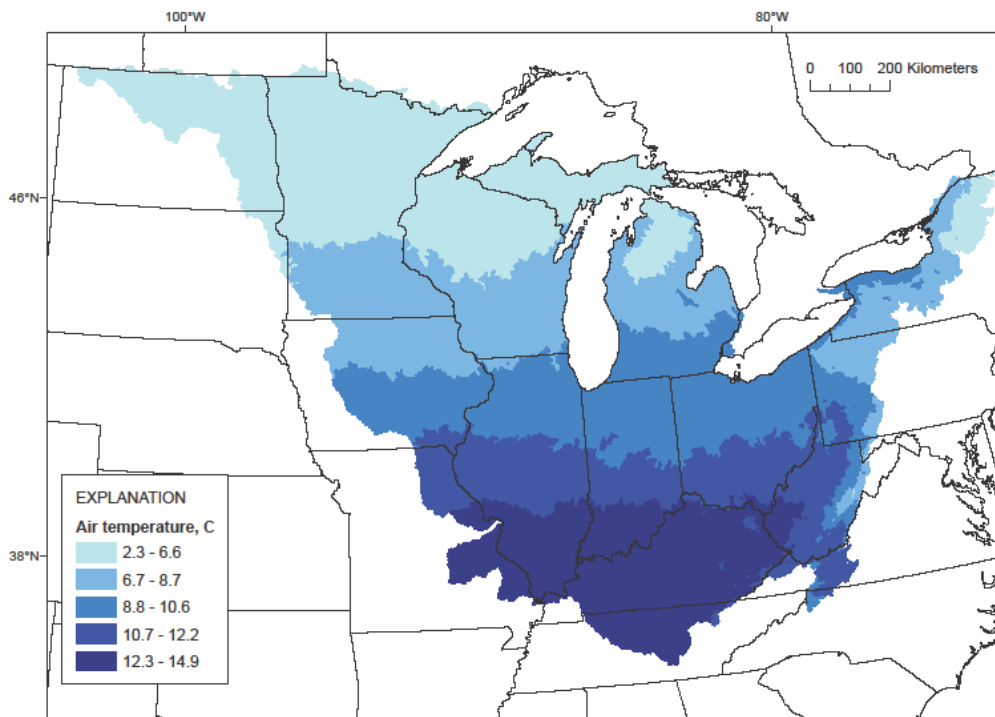

**Figure S11.** Mean annual air temperatures (30 year average from 1971–2000) for MRB3, by SPARROW catchment. Intervals represent five equal quantiles (0-20%, 20-40%, 40-60%, 60-80%, 80-100%).

## Soil clay content

Soil clay content (percentage) was compiled from the STATSGO database (U.S. Department of Agriculture; <http://water.usgs.gov/GIS/metadata/usgswrd/XML/muid.xml> accessed July 2009) using methods described by Wolock (1997). Soils with the lowest clay content are in central Minnesota, northern Wisconsin, and Michigan. Soils with highest clay content occur are in the southern part of MRB3 (Figure S12). Soil clay content is inversely related to soil permeability.

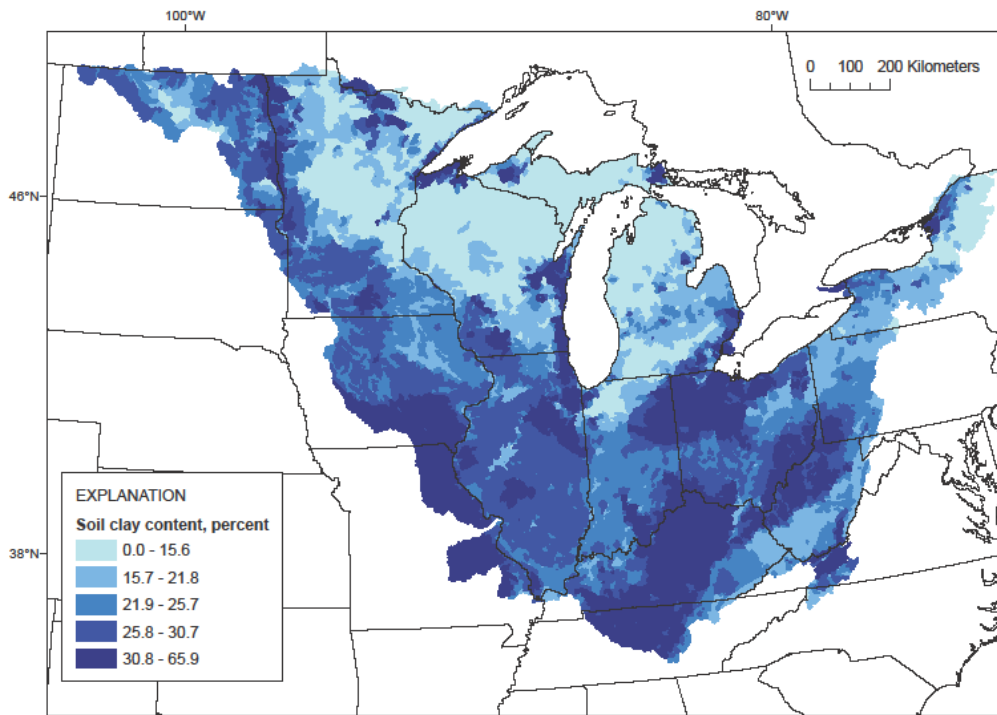

**Figure S12.** Average soil permeability for MRB3, by SPARROW catchment. Intervals represent five equal quantiles (0-20%, 20-40%, 40-60%, 60-80%, 80-100%).

### **Stream and reservoir information**

Time of travel, based on stream velocity, was the factor used to describe nutrient removal (loss) in streams. Mean annual velocity estimates were estimated as a function of the mean annual flow and stream order (ERF1 reference). Mean annual flow for each reach was estimated from flows measured from 1975 to 2007 from gages throughout the country (D. Wolock, USGS, written commun., 2009). Discharges were subdivided into three categories to describe instream loss. The values classifying each category were determined in the calibration process for the SPARROW TP and TN models. For the SPARROW TP model, the three categories of streams were: small, flow  $< \sim 1.4 \text{ m}^3/\text{s}$  or  $< 50 \text{ ft}^3/\text{s}$ ; medium, flow  $\sim 1.4\text{--}2.3 \text{ m}^3/\text{s}$  or  $50\text{--}80 \text{ ft}^3/\text{s}$ ; and large, flow  $> \sim 2.3 \text{ m}^3/\text{s}$ ;  $80 \text{ ft}^3/\text{s}$ ) (Figure S13). For the SPARROW TN model, the three categories of streams were: small, flow  $< \sim 1.1 \text{ m}^3/\text{s}$  or  $< 40 \text{ ft}^3/\text{s}$ ; medium, flow  $\sim 1.1\text{--}2.0 \text{ m}^3/\text{s}$  or  $40\text{--}70 \text{ ft}^3/\text{s}$ ; and large, flow  $> \sim 2.0 \text{ m}^3/\text{s}$ ;  $70 \text{ ft}^3/\text{s}$ ) (Figure S14).

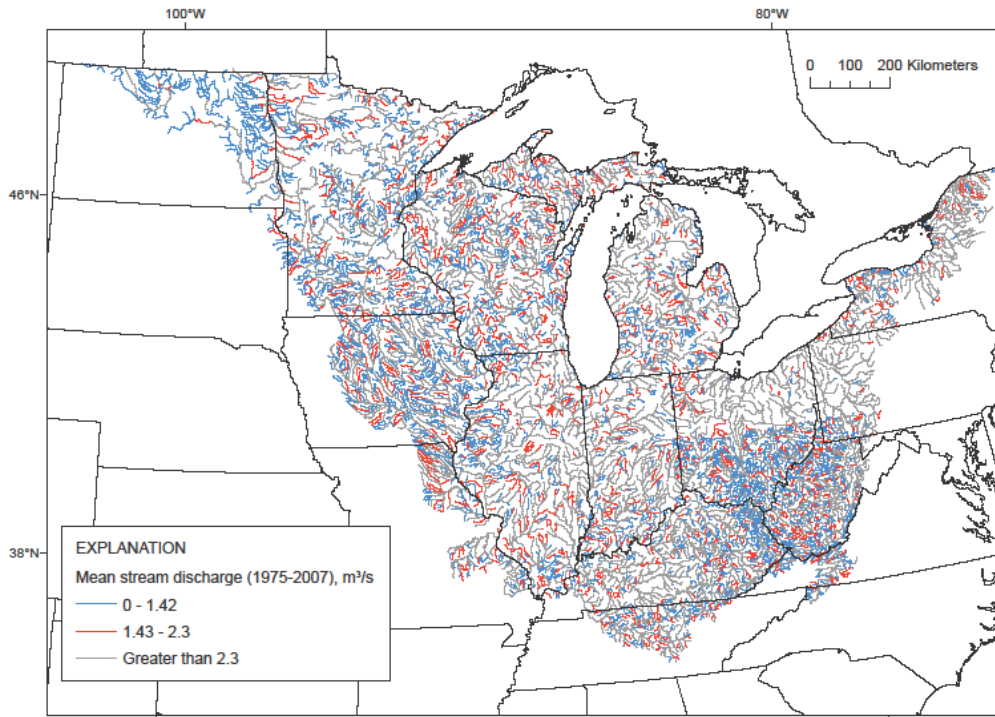

**Figure S13.** Stream discharge associated with reach loss variables in the MRB3 SPARROW TP model.

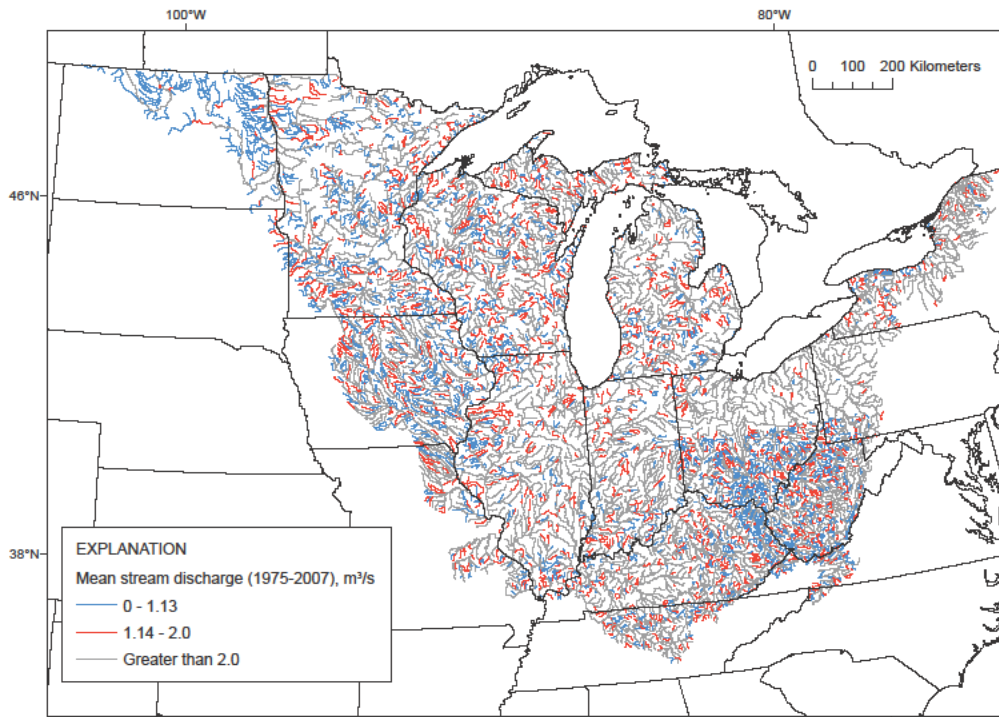

**Figure S14.** Stream discharge associated with reach loss variables in the MRB3 SPARROW TN model.

Hydraulic loading was used to describe nutrient removal in reservoirs (Schwarz *et al.* 2006). Hydraulic loading for each reservoir was calculated as average flow divided by reservoir surface area based on information from the National Inventory of Dams (USACE, 2007). The reservoirs used in the SPARROW models are shown in Figure S15. Nutrient losses in reservoirs that are not included in this coverage were assumed to occur as part of instream loss.



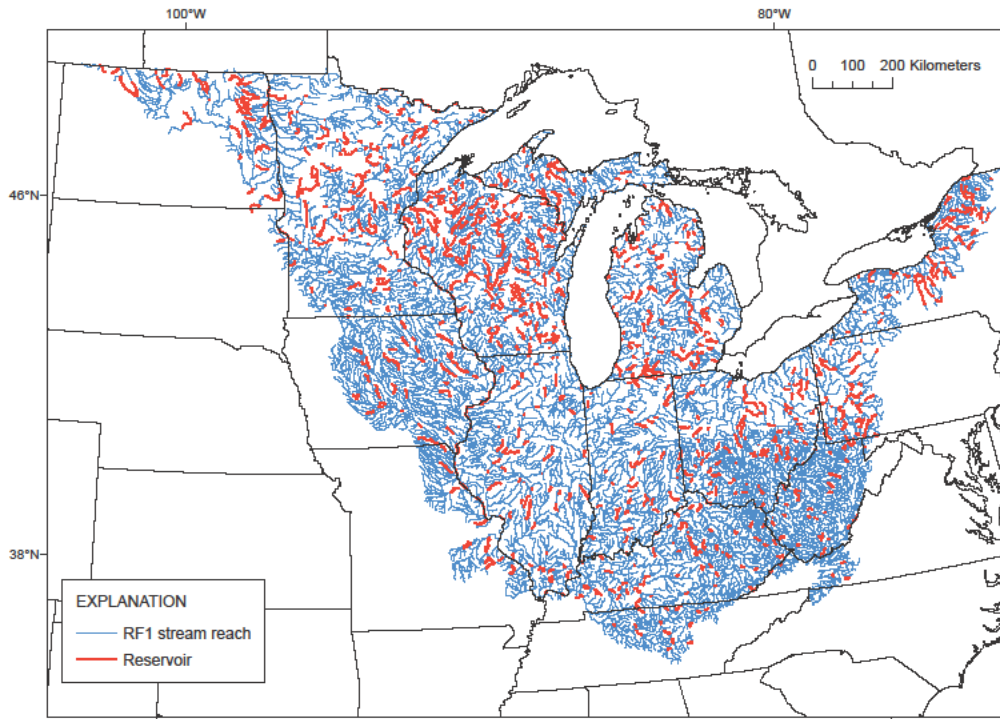

**Figure S15.** RF1 stream reaches and reservoirs used in the MRB3 SPARROW models.

## **5. SPARROW model calibration.**

In the model calibration process, the studentized residuals (difference in the logarithmically transformed observed and simulated loads) were evaluated for evidence of local or regional biases based on visual inspections of residual maps (Figure S16). In the calibration process, the model used the monitored transport from each upstream basin rather than the model-estimated transport to represent the load leaving the upstream basin in an attempt to eliminate prediction errors from cascading downstream to other monitored sites. In Figure 2 of the main manuscript, the full model predictability is evaluated, because errors are allowed to cascade downstream to other monitored sites. In Figure 2 of the main manuscript, full prediction errors are reported; however, in Figure S16, the residuals in the calibration process are using studentized residuals are reported to enable comparisons in the calibration of other MRB SPARROW models. Overall, the models showed little signs of regional biases.

A.

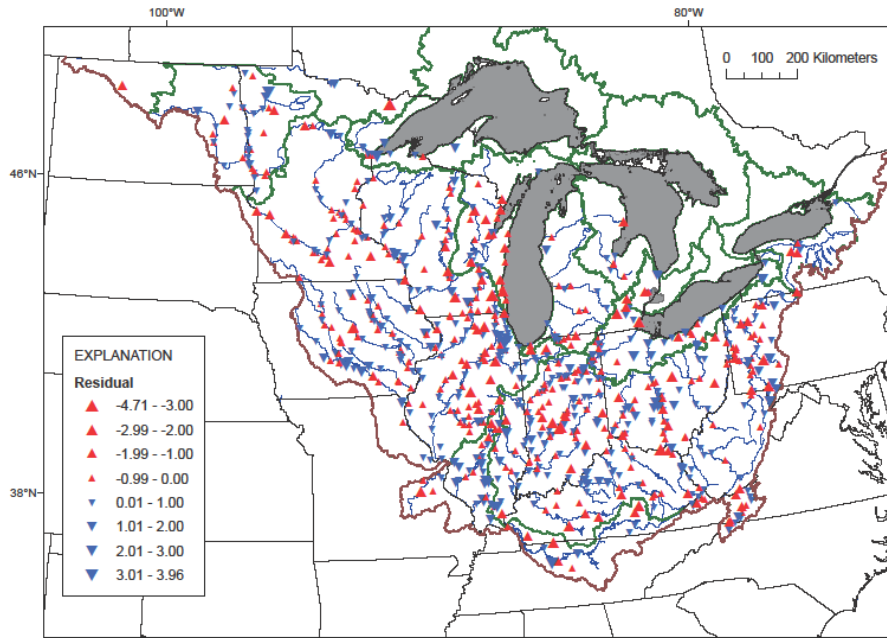

B.

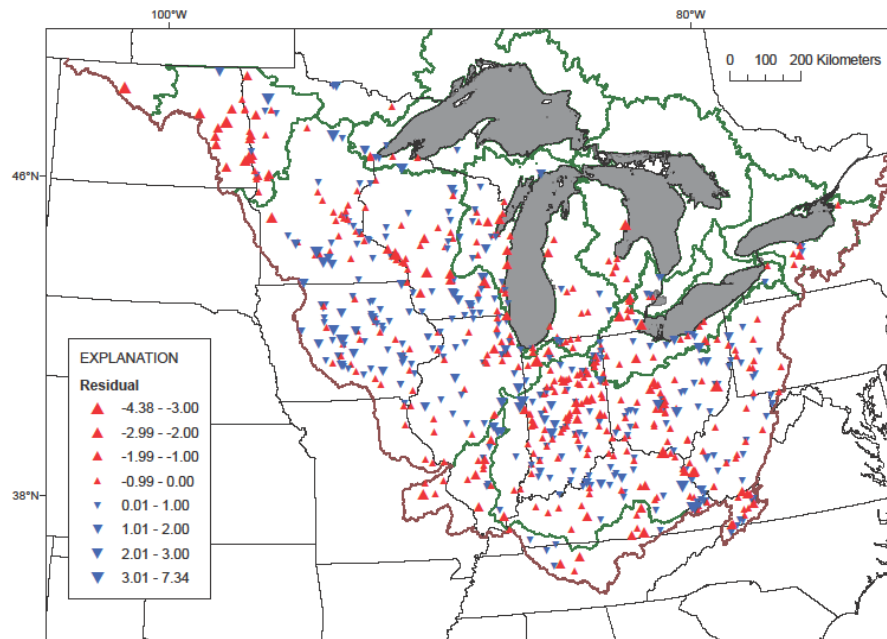

**Figure S16.** Model residuals for stations used to calibrate the final SPARROW models of (A) TP and (B) TN. The residuals are expressed in standardized (studentized) units for the standard normal distribution. The residuals are expressed as the difference in the logarithmically transformed observed and simulated loads: overpredictions are negative values and red triangles, and underpredictions are positive values and blue triangles.

## 6. Output from the MRB3 SPARROW TP and TN models for each Great Lake and nearby large river basin (Tables S3 and S4), each HUC8 (Table S5) and each tributary with a drainage basin greater than 150 km<sup>2</sup> (Table S6).

The total TP and TN load and yield to each Great Lake and nearby large river basin is provided in Tables S3 and S4. The percent contribution of each source of nutrients is given in each table.

Table S3. Total annual phosphorus loads and yields for each Great Lake and major river basin in Major River Basin 3, with the percent contribution by source.

All loads and yields from individual tributaries were adjusted to remove known spatial biases by only predicting areas that are not monitored.

*Supplemental Material to Robertson and Saad, 2011, Journal of the American Water Resources Association, Nutrient Inputs to the Laurentian Great Lakes By Source and River Basin Estimated Using SPARROW Watershed Models.*

[kg, kilogram; km<sup>2</sup>, square kilometer; Yield is load per unit area of the watershed]

| Great Lake/Major River Basin | Drainage area (km <sup>2</sup> ) | Total annual load (Tonnes) | Annual Yield (kg/km <sup>2</sup> ) | Delivery Ratio | Percent Contribution by Source |               |                      |                    |                   |                     |
|------------------------------|----------------------------------|----------------------------|------------------------------------|----------------|--------------------------------|---------------|----------------------|--------------------|-------------------|---------------------|
|                              |                                  |                            |                                    |                | Forest, wetland, shrub         | Point sources | Urban and open areas | Fertilizers (farm) | Manure (confined) | Manure (unconfined) |
| Superior                     | 43,594                           | 782                        | 17.9                               | 0.92           | 69.1                           | 13.6          | 10.3                 | 0.8                | 3.8               | 2.4                 |
| Michigan                     | 116,395                          | 3,430                      | 29.5                               | 0.86           | 11.7                           | 31.4          | 15.4                 | 12.7               | 25.1              | 3.7                 |
| Huron                        | 41,369                           | 927                        | 22.4                               | 0.91           | 13.5                           | 35.4          | 18.4                 | 17.1               | 13.0              | 2.6                 |
| Erie                         | 55,488                           | 4,610                      | 83.1                               | 0.96           | 4.3                            | 42.1          | 10.0                 | 26.3               | 15.4              | 1.9                 |
| Ontario                      | 35,661                           | 1,800                      | 50.5                               | 0.89           | 13.1                           | 44.3          | 6.2                  | 12.1               | 20.4              | 3.9                 |
| Red R.                       | 84,508                           | 1,940                      | 23.0                               | 0.62           | 5.5                            | 6.5           | 7.2                  | 66.9               | 8.6               | 5.4                 |
| Upper Miss. R.               | 446,475                          | 31,400                     | 70.3                               | 0.79           | 4.5                            | 21.0          | 6.3                  | 30.0               | 30.6              | 7.6                 |
| Ohio R.                      | 373,067                          | 27,700                     | 74.2                               | 0.92           | 18.1                           | 21.1          | 8.9                  | 23.7               | 17.4              | 10.8                |

<sup>a</sup>Delivery ratio is computed as the delivered load divided by the total non-decayed load.

Table S4. Total annual nitrogen loads and yields for each Great Lake and major river basin in Major River Basin number 3 (MRB#3), with the percent contribution by source.

All loads and yields from individual tributaries were adjusted to remove known spatial biases by only predicting areas that are not monitored.

*Supplemental Material to Robertson and Saad, 2011, Journal of the American Water Resources Association, Nutrient Inputs to the Laurentian Great Lakes By Source and River Basin Estimated Using SPARROW Watershed Models.*

[kg, kilogram; km<sup>2</sup>, square kilometer; Yield is load per unit area of the watershed]

| Great Lake/Major River Basin | Drainage area (km <sup>2</sup> ) | Total annual load (Tonnes) | Annual Yield (kg/km <sup>2</sup> ) | Delivery Ratio | Percent Contribution by Source      |               |                                 |                    |                   |
|------------------------------|----------------------------------|----------------------------|------------------------------------|----------------|-------------------------------------|---------------|---------------------------------|--------------------|-------------------|
|                              |                                  |                            |                                    |                | Atmospheric deposition in watershed | Point sources | Additional agricultural sources | Fertilizers (farm) | Manure (confined) |
| Superior                     | 43,594                           | 10,900                     | 250                                | 0.91           | 77.8                                | 15.6          | 2.4                             | 1.1                | 3.0               |
| Michigan                     | 116,395                          | 70,000                     | 601                                | 0.84           | 29.3                                | 22.4          | 12.8                            | 18.1               | 17.5              |
| Huron                        | 41,369                           | 25,900                     | 626                                | 0.89           | 29.3                                | 13.1          | 17.7                            | 29.2               | 10.7              |
| Erie                         | 55,488                           | 136,000                    | 2,450                              | 0.96           | 17.4                                | 25.1          | 18.3                            | 32.1               | 7.2               |
| Ontario                      | 35,661                           | 32,800                     | 920                                | 0.86           | 32.7                                | 34.2          | 7.5                             | 8.6                | 17.1              |
| Red R.                       | 84,508                           | 14,200                     | 168                                | 0.59           | 16.0                                | 3.3           | 35.6                            | 42.9               | 2.2               |
| Upper Miss. R.               | 446,475                          | 480,000                    | 1,080                              | 0.74           | 19.4                                | 7.9           | 20.5                            | 35.1               | 17.2              |
| Ohio R.                      | 373,067                          | 357,000                    | 957                                | 0.90           | 35.2                                | 12.8          | 14.3                            | 27.3               | 10.4              |

<sup>a</sup>Delivery ratio is computed as the delivered load divided by the total non-decayed load.

The total TP and TN load and yield from each 8-digit Hydrologic Unit Code (HUC8; Seaber *et al.*, 1987) watershed throughout MRB3 and is provided in Table S5. The incremental nutrient load (load generated from within a HUC8 and delivered to its most downstream reach) was computed for each HUC8 watershed by summing the loads from each reach within the HUC8 watershed. The incremental yield was then computed by dividing the incremental load by the total area of the HUC8 watershed.

The lower and upper 95% confidence limits for the HUC8 loads and yields are also provided in Tables S5\_TP and S5\_TN (attached to the end of the Supporting information). The actual delivered fluxes computed in SPARROW are assumed to depend on a multiplicative error term that represents other sources and processes not included in the SPARROW analysis. Because of this residual term, and because the determination of the predicted flux depends on coefficients that are estimated via statistical methods, the delivered yields across HUC8 watersheds are subject to uncertainty. Because of the nonlinear manner in which the estimated coefficients enter the model, it was necessary to use bootstrap methods (Schwarz *et al.*, 2006) to assess the uncertainty. Bootstrap analyses were also used to correct for potential bias caused by log retransformations in the yield predictions. A brief summary of the bootstrap method is presented here; a full description of the bootstrap methodology is described by Robertson *et al.* (2009).

The bootstrapping method was implemented by performing 200 repeated calibrations of the SPARROW model using randomly selected integer weights (which sum to the total number of monitored reaches in both the models) applied to each of the squared residuals at monitored reaches, resulting in 200 realizations of the estimated coefficients, yields, delivered yields, and residuals. The distribution of the estimated delivered yields for each reach from the 200 iterations was used to estimate the standard errors in the yields from SPARROW. The estimated

confidence interval for delivered yields required explicit consideration of the distribution of residuals in the model, rather than just the summary statistical properties of the residuals. The bootstrap method for incorporating the distribution of the model residuals is based on the empirical distribution of the combined bootstrap-iteration estimate of the modeled component of delivered flux and a randomly selected weighted error from the original monitored values obtained in the original calibration of the model. The 95% confidence interval for the delivered incremental yield from each HUC8 was then estimated using a ratio formulation of the hybrid bootstrap confidence limit (see Shao and Tu, 1995, and Schwarz *et al.*, 2006).

The total load and yield of TN and TP from each tributary (> 150 km<sup>2</sup>) to each Great Lake is provided in Tables S6\_TP and S6\_TN (attached to the end of the Supporting information). The lower and upper 95% confidence limits for the loads are also in Tables S6\_TP and S6\_TN. For each Great Lake, the tributaries are ranked on the basis of their respective loads and yields. It should be noted that SPARROW was only used to estimate the loads from the unmonitored part of each basin, and the confidence limits only represent the uncertainty in that portion of the load (model estimated load); no errors are assumed in the loads estimated with Fluxmaster. The percent contribution of each source of nutrients is also provided in Tables S6\_TP and S6\_TN.

## 7. Comparison in yields from the Great Lake Basins with those from nearby large river basins

Previous large-scale loading studies (Smith *et al.*, 1997) have demonstrated that highest nutrient yields in the U.S. were from watersheds in the Midwest (primarily Iowa, Illinois, Indiana, and western Ohio), part of which drain to the Great Lakes. Many actions have been taken to reduce P loading to the Great Lakes since the early 1970s. To see if these actions have resulted in lower yields compared with those from watersheds outside of the Great Lakes watershed, yields from Great Lake watersheds are compared with those draining away from the Great Lakes. Results from this study indicate that there are a few areas in the Great Lakes Basin that have yields similar to those found in the intensively agricultural areas of the Upper Midwest: western Ohio (identified in the previous studies), and areas in central Wisconsin and Michigan. To determine how yields from the individual lake basins compare with the nearby large river basins, yields to each Great Lake are compared with those from the Upper Mississippi, Ohio, and Red Rivers in Figure S17.

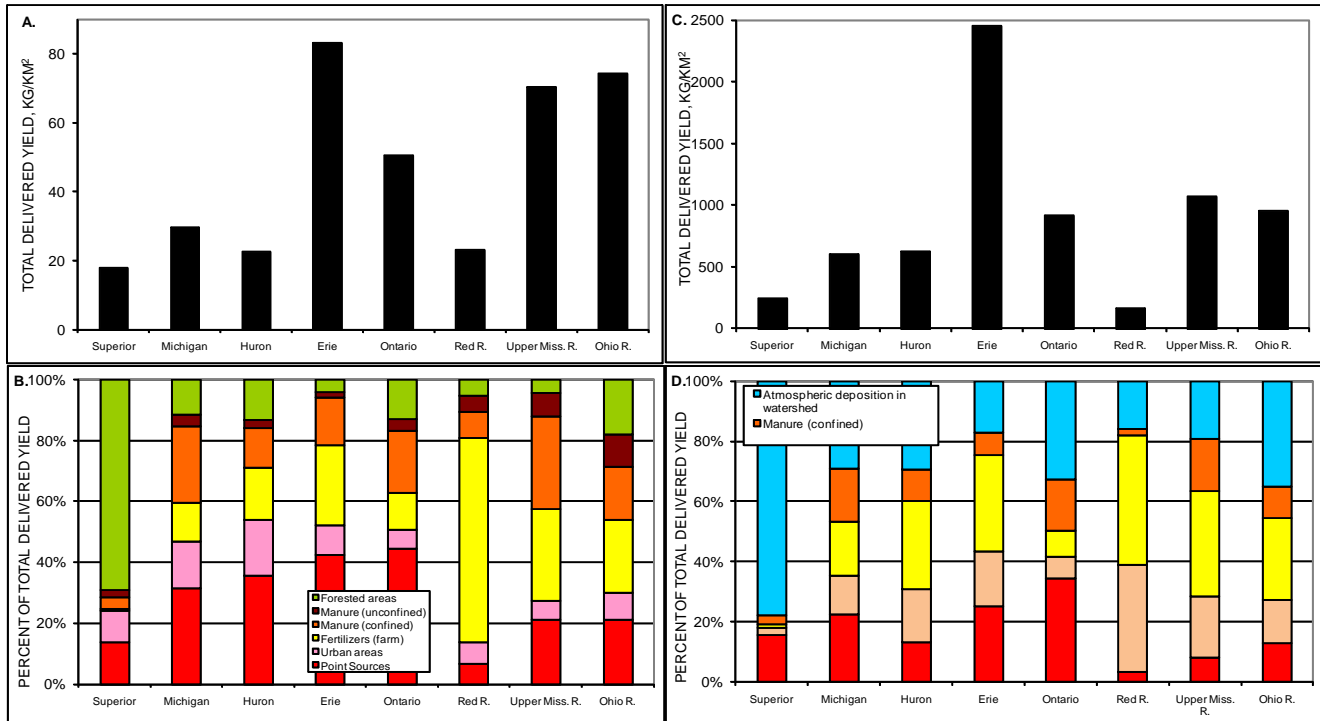

**Figure S17.** Total delivered yield from the watershed of each Great Lake and nearby large river basins for TP and TN, with the percent contributed by each source.

The TP yield from the Lake Erie Basin is slightly higher than those from the Upper Mississippi and Ohio River Basins primarily resulting from the Lake Erie Basin having more point-source inputs (Figure S17). In general, point sources were more important to almost all of the Great Lakes than to the large nearby rivers (7–21% for the large rivers compared to 31–44% for all of the Great Lakes except Lake Superior). Although the land uses vary, TP yields from the Lake Superior and Huron Basins are similar to that of the more intensively farmed Red River Basin. The low yields from the Red River Basin may have resulted from the lower runoff in northern Minnesota and North Dakota than around Lakes Superior and Huron, rather than lower nutrient concentrations in the streams. TP concentrations in streams in the Red River Basin have been shown to be as high as those as many of the intense agricultural areas around the other lakes (Lorenz *et al.*, 2009). The Red River Basin had the highest percentage of TP coming from fertilizer sources, but the lowest percentage coming from point sources.

TN yield from the Lake Erie Basin is almost twice those from the Upper Mississippi and Ohio River Basins, whereas TN yield from the Lake Ontario Basin is similar to those from the large river basins. The higher yield from the Lake Erie Basin was primarily due to it having more input from point sources and streams with shorter travel times and thus less time for losses, such as from denitrification. Point sources of N were more important to most of the Great Lakes than to the large nearby rivers (13–34% for the Great Lakes compared to 3–13% for these large rivers). TN yield from the Red River Basin was less than those from all of the Great Lake Basins. Low TN yields from the Red River Basin, again, may have been caused by less runoff in northern Minnesota and North Dakota than in the forested areas around Lakes Superior and Huron (Lorenz *et al.*, 2009). The Red River watershed had the highest percentage of N coming from agricultural sources, but the lowest percentage coming from point sources.



## 8. References to Supporting Information

Alexander, R.B., R.A. Smith, G.E. Schwarz, E.W. Boyer, J.V. Nolan, and J.W. Brakebill, 2008.

Differences in phosphorus and nitrogen delivery to the Gulf of Mexico from the Mississippi River Basin. *Environmental Science and Technology* 42(3):822-830.

Baumgardner, R.E., T.F. Lavery, C.M. Rogers, and S.S. Isil, 2002. Estimates of the Atmospheric

Deposition of Sulfur and Nitrogen Species: Clean Air Status and Trends Network, 1990-2000.

*Environ. Sci. Technol.*, 36:2614-2629.

Brakebill, J.W., D.M. Wolock, and S.E. Terziotti, this issue. Digital Hydrologic Networks

Supporting Applications Related to Spatially Referenced Regression Modeling. *Journal of the American Water Resources Association*, doi: 10.1111/j.1752-1688.2011.00578.x.

Elliott, E.M., C. Kendall, S.D. Wankel, D.A. Burns, E.W. Boyer, K. Harlin, D.J. Bain, and T.J.

Butler, 2007. Nitrogen Isotopes as Indicators of NO<sub>x</sub> Sources Contributions to Atmospheric Deposition across the Midwestern and northeastern United States, *Environ. Sci. Technol.*, 41:7661-7667.

Geobase, 2009. Land cover, circa 2000-verctor (Canada). Available at <http://www.geobase.ca/geobase/en/data/landcover/index>, accessed on September 28, 2009.

Holland, E.A., B.H. Braswell, J. Sulzman, and J.F. Lamarque, 2005. Nitrogen Deposition on the

United States and Western Europe: Synthesis of Observations and Models, *Ecological Applications*, 15:38-57.

Lorenz, D.L., D.M. Robertson, D.W. Hall, and D.A. Saad. 2009. Trends in streamflow, and

nutrient and suspended sediment concentrations and loads in the Upper Mississippi, Ohio, Red, and Great Lakes River Basins 1975–2004: U.S. Geological Survey Scientific Investigations Report 2008–5213, Reston, VA, 81 p.

- Maupin, M.A. and T. Ivahnenko, this issue. Nutrient Loadings to Streams of the Continental United States From Municipal and Industrial Effluent. *Journal of the American Water Resources Association*, doi: 10.1111/j.1752-1688.2011.00576.x.
- McMahon, G., L. Tervelt, and W. Donehoo, 2007. Methods for estimating annual wastewater nutrient loads in the southeastern United States: U.S. Geological Survey Open-File Report 2007–1040, Reston, VA, 81 p.
- PRISM (Parameter-elevation Regressions on Independent Slopes Model) Climate Group, 2009, Oregon State University, Available at <http://prism.oregonstate.edu>, accessed on August 31, 2009.
- Robertson, D.M., W.J. Rose, and P.F. Juckem, 2009, Water quality and hydrology of Whitefish Lake, Douglas County, Wisconsin, with special emphasis on the responses of an oligotrophic seepage lake to changes in phosphorus loading and water level. U.S. Geol. Survey Scientific Invest. Report 2009–5089, Reston, VA, 41 p.
- Robertson, D.M., G.E. Schwarz, D.A. Saad, and R.B. Alexander, 2009. Incorporating uncertainty into the ranking of SPARROW model nutrient yields from Mississippi/Atchafalaya River basin watersheds. *Journal of the American Water Resources Association* 45(2):534–549.
- Ruddy, B.C., D.L. Lorenz, and D.K. Mueller, 2006. County-Level Estimates of Nutrient Inputs to the Land Surface of the Conterminous United States, 1982–2001. U.S. Geological Survey Scientific Investigations Report 2006-5012, Reston, VA, 17 p.
- Saad, D.A., G.E. Schwarz, D.M. Robertson, and N.L. Booth, this issue. A Multi-Agency Nutrient Dataset Used to Estimate Loads, Improve Monitoring Design, and Calibrate Regional Nutrient SPARROW Models. *Journal of the American Water Resources Association*, doi: 10.1111/j.1752-1688.2011.00575.x.

- Schwarz, G.E., A.B. Hoos, R.B. Alexander, and R.A. Smith, 2006. The SPARROW Surface Water-Quality Model: Theory, Application and User Documentation, U.S. Geological Survey Techniques and Methods Report, Book 6, Chapter B3, Reston, VA, 2006.
- Seaber, P.R., F.P. Kapinos, and G.L. Knapp, 1987. Hydrologic Unit maps: U.S. Geol. Surv. Water-Supply Paper 2294, 63 p. Available online at: <http://water.usgs.gov/GIS/huc.html>, accessed on June 14, 2011.
- Shao, J. and D. Tu, 1995, The jackknife and bootstrap, New York, Springer, 516 p.
- Smith, R.A., G.E. Schwarz, and R.B. Alexander, 1997. Regional interpretation of water-quality monitoring data. *Water Resources Research* 33:2781–2798.
- U.S. Army Corps of Engineers (USACE), 2007. National Inventory of Dams (NID): U.S. Army Engineer Research and Development Center, Available at: [http://www.agc.army.mil/fact\\_sheet/nid.pdf](http://www.agc.army.mil/fact_sheet/nid.pdf), accessed on August 25, 2009.
- U.S. Department of Agriculture (USDA), 2010, NRCS Conservation Programs: Mississippi River Basin Healthy Watersheds Initiative, Available at: <http://www.nrcs.usda.gov/programs/>, accessed on July 14, 2010.
- U.S. Geological Survey (USGS), 2000, National Land Cover Dataset: U.S. Geological Survey Fact Sheet 1008–00, Reston, VA, 1 p.
- Wieczorek, M.E and A.E. Lamotte, 2011. SPARROW model variables for MRB\_E2RF1 catchments, Attributes for MRB-E2RF1 Catchments by major river basins in the conterminous United States: (DS-491-XX), <http://water.usgs.gov/nawqa/modeling/rf1attributes.html>, accessed June 14, 2011.
- Wolock, D.M., 1997. STATSGO Soil Characteristics for the Conterminous United States: U.S. Geological Survey Open-File Report-656, Reston, VA.

Zucker, L.A. and L.C. Brown (Editors). 1998. Agricultural Drainage: Water Quality Impacts and Subsurface Drainage Studies in the Midwest. Ohio State University Extension Bulletin 871. The Ohio State University, Columbus, OH.

Table\_S2\_TP

Table S2\_TP. Summary of measured (with Fluxmaster) and estimated (with SPARROW) loads for each monitoring site used in the calibration of the SPARROW models, with a summary of the measured loads. [Not all water-water quality used in Fluxmaster calculations if outside of year range specified in Table S1.]

Supplemental Material to Robertson and Saad, 2011, *Journal of the American Water Resources Association, Nutrient Inputs to the Laurentian Great Lakes By Source and River Basin Estimated Using SPARROW Watershed Models.*

[kg, kilogram; km<sup>2</sup>, square kilometer; mg/L, milligrams per liter; kg/yr, kilograms per year]

HUC8's are based on Seaber, P.R., F.P. Kapinos, and G.L. Knapp, 1987. Hydrologic Unit maps: U.S. Geol. Surv. Water-Supply Paper 2294, 63 p. Available online at: <http://water.usgs.gov/GIS/huc.html>

| Identification and Location Information |                                                  |         |       |                    |                     |                         | Total Phosphorus Concentration and Load Data |                        |                        |             |                         |                                |                                                |               |                         |
|-----------------------------------------|--------------------------------------------------|---------|-------|--------------------|---------------------|-------------------------|----------------------------------------------|------------------------|------------------------|-------------|-------------------------|--------------------------------|------------------------------------------------|---------------|-------------------------|
| Station Identification                  |                                                  | HUC8    | State | Latitude (decimal) | Longitude (decimal) | Area (km <sup>2</sup> ) | Water                                        | Midmonthly             |                        |             | Fluxmaster Load (kg/yr) | SPARROW Estimated Load (kg/yr) | Standard Deviation in Fluxmaster Loads (kg/yr) |               |                         |
| Number                                  | Name                                             |         |       |                    |                     |                         | Quality Start Date                           | Water Quality End Date | Number of Observations | Mean (mg/L) |                         |                                |                                                | Median (mg/L) | Fluxmaster Load (kg/yr) |
| 000755                                  | CUMBERLAND R 262.9 @ HWY 231 QUAD 313SE          | 5130201 | TN    | 36.29917           | -86.2631            | 28,282.3                | 11/7/1977                                    | 12/7/1998              | 116                    | 0.101       | 0.060                   | 1,798,719                      | 1,146,849                                      | 359,408       |                         |
| 000770                                  | CUMBERLAND R 174.5 U/S FROM CLEESE'S FERRY       | 5130202 | TN    | 36.14842           | -86.8902            | 33,040.0                | 8/8/1972                                     | 10/22/1998             | 163                    | 0.162       | 0.130                   | 1,119,119                      | 1,870,025                                      | 227,146       |                         |
| 002205                                  | RED RIVER 8.4 QUAD 301SE                         | 5130206 | TN    | 36.52833           | -87.2783            | 2,352.1                 | 7/29/1982                                    | 7/8/1998               | 36                     | 0.139       | 0.100                   | 205,092                        | 260,758                                        | 57,636        |                         |
| 010                                     | MISSISSIPPI R BR ON CR-441 1 MI SW OF BLACKBERRY | 7010103 | MN    | 47.17447           | -93.4206            | 9,310.1                 | 5/16/1974                                    | 9/27/1994              | 149                    | 0.071       | 0.048                   | 79,610                         | 51,386                                         | 6,046         |                         |
| 018                                     | KNIFE RIVER UPSTREAM OF US-61 AT KNIFE RIVER     | 4010102 | MN    | 46.94698           | -91.7951            | 225.8                   | 7/10/1974                                    | 9/22/1998              | 74                     | 0.046       | 0.030                   | 7,395                          | 4,245                                          | 1,807         |                         |
| 020051                                  | DRUMMOND BOG DISCHARGE 1MI NE DRUMMOND,WI        | 4010302 | WI    | 46.34888           | -91.2584            | 88.9                    |                                              |                        |                        |             |                         |                                |                                                |               |                         |
| 03011800                                | Kinzua Creek near Guffey, PA                     | 5010001 | PA    | 41.76673           | -78.7187            | 100.5                   | 3/7/1973                                     | 8/16/1995              | 162                    | 0.039       | 0.020                   | 2,560                          | 1,270                                          | 361           |                         |
| 03012600                                | Allegheny River at Warren, PA                    | 5010001 | PA    | 41.8245            | -79.1189            | 5,757.6                 | 1/19/1988                                    | 9/7/2005               | 150                    | 0.027       | 0.030                   | 70,656                         | 129,379                                        | 7,693         |                         |
| 03015000                                | Conewango Creek at Russell, PA                   | 5010002 | PA    | 41.93811           | -79.1331            | 2,113.4                 | 12/23/1970                                   | 9/7/2005               | 315                    | 0.104       | 0.080                   | 74,784                         | 78,340                                         | 5,003         |                         |
| 03015500                                | Brokenstraw Creek at Youngsville, PA             | 5010001 | PA    | 41.85447           | -79.3164            | 831.4                   | 12/23/1970                                   | 9/7/2005               | 220                    | 0.057       | 0.030                   | 17,367                         | 26,866                                         | 1,873         |                         |
| 03016000                                | Allegheny River at West Hickory, PA              | 5010003 | PA    | 41.56971           | -79.4056            | 9,479.4                 | 3/5/1972                                     | 9/6/2005               | 279                    | 0.041       | 0.037                   | 209,150                        | 254,947                                        | 16,793        |                         |
| 03020500                                | Oil Creek at Rouseville, PA                      | 5010003 | PA    | 41.48096           | -79.6953            | 777.0                   | 12/21/1970                                   | 9/21/2005              | 173                    | 0.066       | 0.040                   | 14,839                         | 28,597                                         | 1,683         |                         |
| 03024000                                | French Creek at Utica, PA                        | 5010004 | PA    | 41.43792           | -79.9554            | 2,662.5                 | 12/21/1970                                   | 11/20/2002             | 102                    | 0.084       | 0.050                   | 48,650                         | 92,062                                         | 8,633         |                         |
| 03029500                                | Clarion River at Cooksburg, PA                   | 5010005 | PA    | 41.3314            | -79.209             | 2,090.1                 | 12/24/1970                                   | 9/6/2005               | 217                    | 0.036       | 0.030                   | 40,218                         | 50,219                                         | 4,789         |                         |
| 03031500                                | Allegheny River at Parker, PA                    | 5010006 | PA    | 41.10086           | -79.6794            | 19,867.9                | 7/7/1971                                     | 1/26/2005              | 169                    | 0.082       | 0.040                   | 393,586                        | 522,907                                        | 64,528        |                         |
| 03032500                                | Redbank Creek at St. Charles, PA                 | 5010006 | PA    | 40.99482           | -79.3952            | 1,367.5                 | 9/13/1971                                    | 9/22/2005              | 303                    | 0.041       | 0.030                   | 25,954                         | 43,301                                         | 3,250         |                         |
| 03040000                                | Stonycreek River at Ferndale, PA                 | 5010007 | PA    | 40.28592           | -78.9203            | 1,168.1                 | 10/21/1975                                   | 9/28/1998              | 43                     | 0.033       | 0.026                   | 26,297                         | 45,713                                         | 7,750         |                         |
| 03042000                                | Blacklick Creek at Josephine, PA                 | 5010007 | PA    | 40.47345           | -79.1834            | 497.3                   | 8/2/1972                                     | 6/6/1995               | 211                    | 0.077       | 0.040                   | 23,836                         | 9,312                                          | 2,619         |                         |
| 03044000                                | Conemaugh River at Tunnelton, PA                 | 5010007 | PA    | 40.45451           | -79.3909            | 3,517.2                 | 6/28/1971                                    | 9/28/2005              | 199                    | 0.045       | 0.020                   | 37,532                         | 115,027                                        | 6,239         |                         |
| 03049625                                | Allegheny River at New Kensington, PA            | 5010009 | PA    | 40.56451           | -79.7726            | 29,904.1                | 5/21/1973                                    | 8/10/2004              | 209                    | 0.044       | 0.027                   | 620,789                        | 833,233                                        | 92,048        |                         |
| 03050000                                | TYGART VALLEY RIVER NEAR DAILEY, WV              | 5020001 | WV    | 38.80901           | -79.8822            | 479.2                   | 6/18/1974                                    | 3/12/1996              | 92                     | 0.042       | 0.026                   | 6,346                          | 11,094                                         | 641           |                         |
| 03061000                                | WEST FORK RIVER AT ENTERPRISE, WV                | 5020002 | WV    | 39.42209           | -80.2759            | 1,965.8                 | 7/16/1974                                    | 2/15/2005              | 284                    | 0.100       | 0.068                   | 100,165                        | 73,890                                         | 15,605        |                         |
| 03063000                                | Monongahela R at Lock & Dam 8, at Pnt Marion, PA | 5020003 | PA    | 39.72702           | -79.9115            | 7,044.8                 | 5/23/1973                                    | 9/26/2005              | 31                     | 0.257       | 0.029                   | 273,701                        | 233,510                                        | 91,692        |                         |
| 03072000                                | Dunkard Creek at Shannopin, PA                   | 5020005 | PA    | 39.75916           | -79.9703            | 593.1                   | 7/17/1973                                    | 9/26/2005              | 322                    | 0.049       | 0.030                   | 7,548                          | 15,441                                         | 944           |                         |
| 03077500                                | Youghiogheny River at Youghiogheny River Dam, PA | 5020006 | PA    | 39.80567           | -79.3647            | 1,129.2                 | 8/16/1972                                    | 9/27/2005              | 184                    | 0.038       | 0.020                   | 11,704                         | 21,961                                         | 1,462         |                         |
| 03079000                                | Casselman River at Markleton, PA                 | 5020006 | PA    | 39.85987           | -79.2283            | 989.4                   | 8/16/1972                                    | 8/17/1995              | 152                    | 0.085       | 0.040                   | 63,969                         | 40,318                                         | 9,210         |                         |
| 03083250                                | Sewickley Creek at Hunker, PA                    | 5020006 | PA    | 40.20642           | -79.623             | 230.0                   | 1/5/1971                                     | 6/5/1995               | 235                    | 0.347       | 0.160                   | 34,619                         | 15,812                                         | 3,117         |                         |
| 03083500                                | Youghiogheny River at Sutersville, PA            | 5020006 | PA    | 40.24003           | -79.8063            | 4,441.9                 | 12/28/1972                                   | 9/14/2005              | 330                    | 0.106       | 0.040                   | 158,652                        | 143,534                                        | 23,834        |                         |
| 03085000                                | Monongahela River at Braddock, PA                | 5020005 | PA    | 40.39043           | -79.8586            | 19,002.8                | 2/13/1973                                    | 8/10/2004              | 232                    | 0.068       | 0.050                   | 472,769                        | 597,878                                        | 60,218        |                         |
| 03086000                                | Ohio River at Sewickley, PA                      | 5030101 | PA    | 40.55023           | -80.204             | 50,505.0                | 5/23/1973                                    | 9/1/2005               | 84                     | 0.089       | 0.045                   | 2,312,488                      | 1,776,312                                      | 172,122       |                         |
| 03099500                                | Mahoning River at Lowellville OH                 | 5030103 | OH    | 41.03598           | -80.5368            | 2,779.1                 | 10/26/1987                                   | 9/22/2000              | 141                    | 0.490       | 0.345                   | 160,934                        | 227,271                                        | 19,679        |                         |
| 03099600                                | Mahoning River at North Edinburg, PA             | 5030103 | PA    | 41.01839           | -80.4406            | 2,846.4                 | 10/20/1987                                   | 9/13/2005              | 160                    | 0.356       | 0.310                   | 175,038                        | 231,119                                        | 18,735        |                         |
| 03103500                                | Shenango River at Sharpsville, PA                | 5030102 | PA    | 41.26617           | -80.4726            | 1,512.6                 | 10/8/1970                                    | 9/19/2005              | 319                    | 0.085       | 0.070                   | 44,020                         | 43,470                                         | 3,248         |                         |
| 03105500                                | Beaver River at Wampum, PA                       | 5030104 | PA    | 40.88894           | -80.3366            | 5,788.7                 | 12/23/1970                                   | 9/15/2003              | 333                    | 0.266       | 0.240                   | 287,380                        | 365,864                                        | 32,532        |                         |
| 03106000                                | Connoquenessing Creek near Zelenople, PA         | 5030105 | PA    | 40.81673           | -80.2426            | 922.0                   | 10/5/1971                                    | 9/1/2005               | 295                    | 0.137       | 0.100                   | 21,434                         | 37,346                                         | 2,202         |                         |
| 03106500                                | Slippery Rock Creek at Wurttemberg, PA           | 5030105 | PA    | 40.88412           | -80.2338            | 1,030.8                 | 3/6/1973                                     | 9/1/2005               | 316                    | 0.059       | 0.040                   | 26,261                         | 32,206                                         | 2,482         |                         |
| 03107500                                | Beaver River at Beaver Falls, PA                 | 5030104 | PA    | 40.76298           | -80.3159            | 8,044.5                 | 10/5/1971                                    | 7/5/2006               | 665                    | 0.199       | 0.160                   | 426,095                        | 586,020                                        | 21,159        |                         |
| 03108000                                | Raccoon Creek at Moffatts Mill, PA               | 5030101 | PA    | 40.62784           | -80.3376            | 461.0                   | 10/5/1971                                    | 9/1/2005               | 294                    | 0.106       | 0.070                   | 7,795                          | 15,540                                         | 853           |                         |
| 03109500                                | Little Beaver Creek near East Liverpool OH       | 5030101 | OH    | 40.67576           | -80.5404            | 1,284.6                 | 8/19/1971                                    | 12/22/1998             | 272                    | 0.122       | 0.070                   | 71,625                         | 68,963                                         | 12,793        |                         |
| 03146500                                | Licking River near Newark OH                     | 5040006 | OH    | 40.05923           | -82.3383            | 1,390.8                 | 8/21/1974                                    | 1/17/1997              | 280                    | 0.351       | 0.210                   | 110,954                        | 106,482                                        | 7,713         |                         |
| 03150000                                | Muskingum River at McConnellsville OH            | 5040004 | OH    | 39.64409           | -81.8506            | 19,223.0                | 11/27/1970                                   | 12/5/2004              | 1343                   | 0.138       | 0.116                   | 1,342,000                      | 1,429,045                                      | 17,529        |                         |
| 03155000                                | LITTLE KANAWHA RIVER AT PALESTINE, WV            | 5030203 | WV    | 39.05893           | -81.3893            | 3,926.4                 | 1/29/1974                                    | 5/9/1995               | 239                    | 0.050       | 0.033                   | 115,303                        | 136,002                                        | 11,106        |                         |
| 03157000                                | Clear Creek near Rockbridge OH                   | 5030204 | OH    | 39.58835           | -82.5785            | 230.5                   | 10/12/1971                                   | 9/20/1995              | 46                     | 0.056       | 0.050                   |                                |                                                |               |                         |
| 03164000                                | NEW RIVER NEAR GALAX, VA                         | 5050001 | VA    | 36.64646           | -80.9777            | 2,929.3                 | 7/11/1979                                    | 12/17/1998             | 200                    | 0.090       | 0.100                   | 146,779                        | 86,084                                         | 18,221        |                         |
| 03167000                                | REED CREEK AT GRAHAMS FORGE, VA                  | 5050001 | VA    | 36.93946           | -80.887             | 639.7                   | 1/23/1979                                    | 11/17/1998             | 190                    | 0.091       | 0.100                   | 14,662                         | 34,060                                         | 1,255         |                         |
| 03170000                                | LITTLE RIVER AT GRAYSONTOWN, VA                  | 5050001 | VA    | 37.03733           | -80.5567            | 777.0                   | 7/25/1979                                    | 9/4/1998               | 129                    | 0.097       | 0.100                   | 40,212                         | 30,422                                         | 16,499        |                         |

Table\_S2\_TP

|          |                                               |         |    |          |          |           |            |            |      |       |       |            |            |           |
|----------|-----------------------------------------------|---------|----|----------|----------|-----------|------------|------------|------|-------|-------|------------|------------|-----------|
| 03171500 | NEW RIVER AT EGGLESTON, VA                    | 5050002 | VA | 37.29008 | -80.6161 | 7,617.2   | 9/11/1973  | 12/8/1998  | 121  | 0.097 | 0.100 | 440,346    | 288,534    | 51,153    |
| 03176500 | NEW RIVER AT GLEN LYN, VA                     | 5050002 | VA | 37.37221 | -80.8613 | 9,759.1   | 1/17/1979  | 12/8/1998  | 320  | 0.090 | 0.100 | 273,860    | 338,975    | 15,510    |
| 03184000 | GREENBRIER RIVER AT HILLDALE, WV              | 5050003 | WV | 37.64012 | -80.8047 | 4,193.2   | 12/4/1973  | 5/4/1995   | 242  | 0.037 | 0.024 | 89,237     | 99,595     | 9,325     |
| 03189100 | GAULEY RIVER NEAR CRAIGSVILLE, WV             | 5050005 | WV | 38.29094 | -80.6409 | 1,370.1   | 6/25/1974  | 5/28/1998  | 69   | 0.028 | 0.010 |            |            |           |
| 03189600 | GAULEY RIVER BELOW SUMMERSVILLE, WV           | 5050005 | WV | 38.21511 | -80.8882 | 2,087.5   | 6/25/1974  | 5/28/1998  | 62   | 0.015 | 0.010 |            |            |           |
| 03193000 | KANAWHA RIVER AT KANAWHA FALLS, WV            | 5050006 | WV | 38.13774 | -81.2135 | 21,680.9  | 12/17/1973 | 9/3/1998   | 38   | 0.094 | 0.050 |            |            |           |
| 03194700 | ELK RIVER BELOW WEBSTER SPRINGS, WV           | 5050007 | WV | 38.59741 | -80.4905 | 688.9     | 9/11/1973  | 5/27/1998  | 67   | 0.021 | 0.010 |            |            |           |
| 03198350 | CLEAR FORK AT WHITESVILLE, WV                 | 5050009 | WV | 37.96624 | -81.5241 | 162.7     | 10/22/1996 | 3/8/2000   | 49   | 0.035 | 0.050 |            |            |           |
| 03201300 | KANAWHA RIVER AT WINFIELD, WV                 | 5050008 | WV | 38.52657 | -81.9116 | 30,585.3  | 2/15/1974  | 7/12/2006  | 645  | 0.096 | 0.067 | 903,608    | 831,157    | 68,710    |
| 03202000 | Raccoon Creek at Adamsville OH                | 5090101 | OH | 38.85896 | -82.3618 | 1,515.2   | 9/16/1974  | 9/1/1998   | 60   | 0.085 | 0.050 | 30,379     | 53,948     | 7,074     |
| 03209300 | RUSSELL FORK AT ELKHORN CITY, KY              | 5070202 | KY | 37.30401 | -82.3428 | 1,434.9   | 8/25/1971  | 12/12/1995 | 42   | 0.036 | 0.020 |            |            |           |
| 03209500 | LEVISA FORK AT PIKEVILLE, KY                  | 5070203 | KY | 37.46425 | -82.5263 | 3,190.9   | 3/27/1979  | 11/16/2006 | 257  | 0.031 | 0.018 | 24,522     | 46,610     | 5,268     |
| 03215000 | BIG SANDY R AT LOUISA, KY                     | 5070204 | WV | 38.1708  | -82.6347 | 10,093.2  | 8/31/1971  | 7/11/2006  | 453  | 0.112 | 0.069 | 348,496    | 153,810    | 47,840    |
| 03216600 | OHIO RIVER AT GREENUP DAM NEAR GREENUP, KY    | 5090103 | KY | 38.64684 | -82.8588 | 160,580.0 | 10/22/1974 | 7/25/2006  | 165  | 0.089 | 0.066 | 10,790,848 | 6,378,772  | 989,683   |
| 03219500 | Scioto River near Prospect OH                 | 5060001 | OH | 40.4195  | -83.1971 | 1,468.5   | 8/31/1971  | 10/2/1995  | 135  | 0.450 | 0.290 | 160,831    | 131,569    | 18,992    |
| 03225500 | Olentangy River near Delaware OH              | 5060001 | OH | 40.35499 | -83.0678 | 1,017.9   | 12/15/1970 | 3/28/1995  | 84   | 0.105 | 0.081 | 48,195     | 84,221     | 11,828    |
| 03229000 | Alum Creek at Columbus OH                     | 5060001 | OH | 39.94484 | -82.9413 | 489.5     | 10/23/1970 | 9/19/1996  | 64   | 0.155 | 0.080 | 13,394     | 39,555     | 3,367     |
| 03229500 | Big Walnut Creek at Rees OH                   | 5060001 | OH | 39.85673 | -82.9571 | 1,409.0   | 10/28/1970 | 9/3/1991   | 37   | 0.231 | 0.210 | 85,233     | 87,675     | 28,755    |
| 03230450 | Hellbranch Run near Harrisburg OH             | 5060001 | OH | 39.83063 | -83.1598 | 95.8      | 1/4/1993   | 9/27/2005  | 172  | 0.131 | 0.063 | 20,211     | 6,844      | 2,910     |
| 03230500 | Big Darby Creek at Darbyville OH              | 5060001 | OH | 39.70097 | -83.1096 | 1,383.1   | 10/30/1970 | 12/12/1996 | 294  | 0.184 | 0.120 | 97,407     | 93,444     | 8,709     |
| 03230800 | Deer Creek at Mount Sterling OH               | 5060002 | OH | 39.71514 | -83.2574 | 590.5     | 10/29/1970 | 12/16/1996 | 71   | 0.266 | 0.076 | 69,306     | 33,190     | 25,433    |
| 03231500 | Scioto River at Chillicothe OH                | 5060002 | OH | 39.34217 | -82.9713 | 9,968.9   | 6/8/1973   | 12/6/2004  | 3116 | 0.457 | 0.370 | 1,097,308  | 979,249    | 13,820    |
| 03232000 | Paint Creek near Greenfield OH                | 5060003 | OH | 39.37929 | -83.3754 | 644.9     | 12/10/1970 | 1/10/1997  | 52   | 0.468 | 0.250 | 40,525     | 40,306     | 9,633     |
| 03234500 | Scioto River at Higby OH                      | 5060002 | OH | 39.21192 | -82.8644 | 13,289.3  | 6/8/1973   | 12/14/1998 | 470  | 0.391 | 0.330 | 893,053    | 1,181,137  | 70,431    |
| 03237280 | Upper Twin Creek at McGaw OH                  | 5090201 | OH | 38.64375 | -83.2155 | 31.6      | 10/22/1970 | 8/29/2001  | 264  | 0.023 | 0.010 | 70         | 582        | 19        |
| 03240000 | Little Miami River near Oldtown OH            | 5090202 | OH | 39.74792 | -83.9314 | 334.1     | 9/17/1971  | 12/17/1998 | 282  | 0.165 | 0.100 | 10,066     | 15,342     | 1,539     |
| 03242200 | Anderson Fork near New Burlington OH          | 5090202 | OH | 39.56638 | -83.9028 | 201.5     | 10/20/1970 | 9/1/1998   | 36   | 0.126 | 0.060 | 15,999     | 8,680      | 7,648     |
| 03245500 | Little Miami River at Milford OH              | 5090202 | OH | 39.17138 | -84.2985 | 3,115.8   | 10/28/1970 | 9/13/2000  | 245  | 0.466 | 0.380 | 362,831    | 330,538    | 33,842    |
| 03248100 | Little Miami River at Cincinnati OH           | 5090202 | OH | 39.10921 | -84.4016 | 4,517.0   | 10/1/1973  | 7/26/2006  | 266  | 0.401 | 0.310 | 297,246    | 476,722    | 32,374    |
| 03265000 | Stillwater River at Pleasant Hill OH          | 5080001 | OH | 40.05779 | -84.356  | 1,302.8   | 8/12/1971  | 12/17/1998 | 67   | 0.208 | 0.160 | 84,106     | 193,796    | 18,860    |
| 03267900 | Mad River at St Paris Pike at Eagle City OH   | 5080001 | OH | 39.96415 | -83.8314 | 802.9     | 10/15/1970 | 10/13/2004 | 331  | 0.120 | 0.060 | 34,947     | 45,576     | 3,727     |
| 03270000 | Mad River near Dayton OH                      | 5080001 | OH | 39.79702 | -84.0916 | 1,644.7   | 10/7/1970  | 12/27/1990 | 180  | 0.341 | 0.300 | 196,442    | 119,566    | 8,562     |
| 03271601 | Great Miami River below Miamisburg OH         | 5080002 | OH | 39.60687 | -84.2865 | 7,031.9   | 4/22/1996  | 12/6/2004  | 2785 | 0.371 | 0.322 | 925,079    | 759,240    | 12,873    |
| 03274000 | Great Miami River at Hamilton OH              | 5080002 | OH | 39.39116 | -84.5718 | 9,401.7   | 9/21/1973  | 9/18/2001  | 153  | 0.513 | 0.404 | 1,069,294  | 1,010,896  | 117,671   |
| 03274600 | Great Miami River at New Baltimore OH         | 5080002 | OH | 39.26318 | -84.6677 | 9,878.3   | 12/8/1972  | 9/20/1995  | 209  | 0.473 | 0.420 | 1,564,936  | 1,070,607  | 76,449    |
| 03275000 | WHITEWATER RIVER NEAR ALPINE, IN              | 5080003 | IN | 39.57944 | -85.1574 | 1,352.0   | 2/18/1987  | 9/13/2000  | 70   | 0.091 | 0.070 | 93,332     | 79,826     | 27,765    |
| 03275600 | EAST FORK WHITEWATER RIVER AT ABINGTON, IND.  | 5080003 | IN | 39.73251 | -84.9596 | 518.0     | 3/11/1971  | 2/14/2006  | 249  | 0.284 | 0.120 | 19,267     | 49,665     | 2,059     |
| 03277200 | OHIO RIVER AT MARKLAND DAM NEAR WARSAW, KY    | 5090203 | KY | 38.77632 | -84.9642 | 215,410.3 | 10/30/1974 | 7/13/2006  | 367  | 0.152 | 0.100 | 12,174,237 | 11,205,103 | 1,165,267 |
| 03281000 | MIDDLE FORK KENTUCKY RIVER AT TALLEGA, KY     | 5100202 | KY | 37.55533 | -83.5938 | 1,390.8   | 9/7/1971   | 7/19/2006  | 276  | 0.031 | 0.016 | 19,785     | 24,329     | 3,259     |
| 03281500 | SOUTH FORK KENTUCKY RIVER AT BOONEVILLE, KY   | 5100203 | KY | 37.47928 | -83.6751 | 1,870.0   | 10/20/1971 | 7/19/2006  | 271  | 0.027 | 0.013 | 28,338     | 38,519     | 5,977     |
| 03285000 | DIX RIVER NEAR DANVILLE, KY                   | 5100205 | KY | 37.64208 | -84.6609 | 823.6     | 10/7/1970  | 10/3/2006  | 200  | 0.085 | 0.063 | 40,576     | 106,690    | 5,926     |
| 03289500 | ELKHORN CREEK NEAR FRANKFORT, KY              | 5100205 | KY | 38.26859 | -84.8146 | 1,225.1   | 10/2/1970  | 11/17/2006 | 111  | 0.647 | 0.510 | 278,699    | 218,700    | 36,723    |
| 03290500 | KENTUCKY RIVER AT LOCK 2 AT LOCKPORT, KY      | 5100205 | KY | 38.43867 | -84.9625 | 16,006.2  | 2/7/1973   | 6/6/1995   | 217  | 0.182 | 0.150 | 1,594,137  | 1,079,742  | 93,070    |
| 03291500 | EAGLE CREEK AT GLENCOE, KY                    | 5100205 | KY | 38.70589 | -84.8252 | 1,131.8   | 10/6/1970  | 11/17/2006 | 201  | 0.132 | 0.079 | 117,777    | 121,864    | 15,956    |
| 03294600 | OHIO RIVER AT KOSMOSDALE, KY                  | 5140101 | KY | 38.03519 | -85.9175 | 236,208.0 | 10/12/1976 | 7/26/2006  | 315  | 0.264 | 0.180 | 26,182,650 | 12,917,495 | 2,779,600 |
| 03298500 | SALT RIVER AT SHEPHERDSVILLE, KY              | 5140102 | KY | 37.98519 | -85.7174 | 3,100.2   | 10/5/1970  | 12/19/2006 | 374  | 0.277 | 0.216 | 495,989    | 355,897    | 36,124    |
| 03301630 | ROLLING FORK NEAR LEBANON JUNCTION, KY        | 5140103 | KY | 37.82258 | -85.7477 | 3,561.3   | 10/8/1974  | 12/19/2006 | 284  | 0.211 | 0.154 | 434,228    | 406,004    | 39,914    |
| 03303280 | OHIO RIVER AT CANNELTON DAM AT CANNELTON, IN  | 5140201 | KY | 37.89848 | -86.7042 | 251,230.0 | 10/1/1975  | 7/27/2006  | 483  | 0.159 | 0.100 | 22,258,297 | 14,074,204 | 1,348,503 |
| 03308500 | GREEN RIVER AT MUNFORDVILLE, KY               | 5110001 | KY | 37.26779 | -85.8857 | 4,333.1   | 8/25/1971  | 12/14/2006 | 312  | 0.064 | 0.042 | 109,649    | 332,872    | 10,483    |
| 03314500 | BARREN RIVER AT BOWLING GREEN, KY             | 5110002 | KY | 37.0014  | -86.4305 | 4,788.9   | 10/26/1970 | 9/12/1994  | 177  | 0.044 | 0.031 | 117,856    | 489,532    | 9,870     |
| 03322500 | WABASH RIVER NEAR NEW CORYDON, IND            | 5120101 | IN | 40.56323 | -84.8028 | 678.6     | 12/22/1970 | 2/13/2006  | 42   | 0.568 | 0.415 | 165,220    | 142,824    | 27,577    |
| 03325500 | MISSISSINAWA RIVER NEAR RIDGEVILLE, IND.      | 5120103 | IN | 40.28015 | -84.9958 | 344.5     | 6/5/1979   | 2/13/2006  | 300  | 0.263 | 0.170 | 36,470     | 42,988     | 3,932     |
| 03328500 | EEL RIVER NEAR LOGANSPOIT, IN                 | 5120104 | IN | 40.78212 | -86.2646 | 2,043.5   | 1/22/1976  | 2/22/2006  | 343  | 0.139 | 0.100 | 174,205    | 116,704    | 12,665    |
| 03329700 | DEER CREEK NEAR DELPHI, IND.                  | 5120105 | IN | 40.59032 | -86.6217 | 709.7     | 3/25/1998  | 2/22/2006  | 92   | 0.086 | 0.060 | 55,162     | 61,818     | 12,408    |
| 03335500 | WABASH RIVER AT LAFAYETTE IND                 | 5120108 | IN | 40.42193 | -86.8963 | 18,821.5  | 2/26/1971  | 12/6/1995  | 244  | 0.224 | 0.140 | 1,741,601  | 1,380,426  | 127,904   |
| 03336645 | MIDDLE FORK VERMILION RIVER ABOVE OAKWOOD, IL | 5120109 | IL | 40.13627 | -87.7462 | 1,118.9   | 10/19/1978 | 12/8/1998  | 150  | 0.100 | 0.050 | 110,859    | 111,802    | 19,015    |
| 03338780 | NORTH FORK VERMILION RIVER NEAR BISMARCK, IL  | 5120109 | IL | 40.26517 | -87.6438 | 678.6     | 11/10/1988 | 12/30/1998 | 90   | 0.145 | 0.100 | 52,819     | 43,559     | 8,734     |
| 03339000 | VERMILION RIVER NEAR DANVILLE, IL             | 5120109 | IL | 40.0874  | -87.597  | 3,341.1   | 4/11/1978  | 12/10/1998 | 167  | 0.498 | 0.310 | 314,565    | 288,176    | 20,327    |
| 03341910 | WABASH RIVER AT HUTSONVILLE, IL               | 5120111 | IN | 39.11028 | -87.655  | 33,715.1  | 7/20/1972  | 12/15/1998 | 146  | 0.229 | 0.200 | 4,084,683  | 2,400,253  | 382,342   |
| 03341920 | TURMAN CREEK NR FARMERSBURG, IN               | 5120111 | IN | 39.24448 | -87.4078 | 33.7      | 7/20/1972  | 4/14/1997  | 125  | 0.232 | 0.200 | 4,319      | 2,137      | 431       |

Table\_S2\_TP

|           |                                                    |         |    |          |          |          |            |            |      |       |       |           |           |         |
|-----------|----------------------------------------------------|---------|----|----------|----------|----------|------------|------------|------|-------|-------|-----------|-----------|---------|
| 03343395  | EMBARRAS RIVER AT CAMARGO, IL                      | 5120112 | IL | 39.79916 | -88.1701 | 466.2    | 3/14/1984  | 12/21/1998 | 129  | 0.120 | 0.090 | 13,970    | 25,924    | 1,465   |
| 03345500  | EMBARRAS RIVER AT STE. MARIE, IL                   | 5120112 | IL | 38.93536 | -88.0146 | 3,924.6  | 2/29/1972  | 12/16/1998 | 192  | 0.270 | 0.190 | 350,466   | 355,911   | 36,575  |
| 03346000  | NORTH FORK EMBARRAS RIVER NEAR OBLONG, IL          | 5120112 | IL | 39.00893 | -87.9461 | 823.6    | 10/5/1971  | 12/16/1998 | 190  | 0.226 | 0.160 | 72,891    | 97,894    | 8,986   |
| 03351500  | FALL CREEK NEAR FORTVILLE, IND.                    | 5120201 | IN | 39.95456 | -85.8676 | 437.7    | 10/26/1972 | 2/15/2006  | 101  | 0.083 | 0.070 | 19,290    | 19,549    | 2,006   |
| 03354000  | WHITE RIVER NEAR CENTERTON, IN                     | 5120201 | IN | 39.49722 | -86.4009 | 6,330.0  | 3/17/1971  | 8/17/1995  | 246  | 0.907 | 0.610 | 1,383,891 | 771,725   | 76,525  |
| 03357500  | BIG WALNUT CREEK NEAR REELSVILLE, IN               | 5120203 | IN | 39.53572 | -86.9763 | 844.3    | 2/27/1996  | 11/13/2003 | 61   | 0.096 | 0.080 | 36,259    | 56,109    | 5,290   |
| 03358000  | MILL CREEK NEAR CATARACT, IND.                     | 5120203 | IN | 39.43349 | -86.7634 | 634.6    | 7/26/1971  | 2/14/2006  | 355  | 0.108 | 0.070 | 37,119    | 42,881    | 4,273   |
| 03362500  | SUGAR CREEK NEAR EDINBURGH, IN                     | 5120204 | IN | 39.36097 | -85.9982 | 1,227.7  | 2/6/1986   | 2/9/2006   | 134  | 0.124 | 0.110 | 77,366    | 90,227    | 7,147   |
| 03366500  | MUSCATATUCK RIVER NEAR DEPUTY, IN                  | 5120207 | IN | 38.80426 | -85.6738 | 758.9    | 4/5/1993   | 4/18/1995  | 28   | 0.103 | 0.070 | 61,599    | 58,543    | 16,598  |
| 03374100  | WHITE RIVER AT HAZLETON, IN                        | 5120202 | IN | 38.48977 | -87.55   | 29,280.0 | 2/21/1973  | 2/13/2006  | 524  | 0.207 | 0.180 | 2,886,170 | 2,305,666 | 119,242 |
| 03378000  | BONPAS CREEK AT BROWNS, IL                         | 5120113 | IL | 38.38246 | -87.9769 | 590.5    | 2/16/1984  | 12/16/1998 | 124  | 0.248 | 0.190 | 85,778    | 79,928    | 7,789   |
| 03378500  | WABASH RIVER AT NEW HARMONY, IND.                  | 5120113 | IN | 38.1314  | -87.9429 | 75,716.1 | 11/7/1974  | 7/13/2006  | 333  | 0.223 | 0.200 | 7,717,761 | 5,946,186 | 375,691 |
| 03378635  | LITTLE WABASH RIVER NEAR EFFINGHAM, IL             | 5120114 | IL | 39.10344 | -88.5926 | 621.6    | 5/29/1979  | 12/21/1998 | 129  | 0.214 | 0.170 | 48,101    | 69,629    | 5,208   |
| 03378900  | LITTLE WABASH RIVER AT LOUISVILLE, IL              | 5120114 | IL | 38.77291 | -88.497  | 1,929.6  | 7/11/1973  | 12/8/1998  | 171  | 0.289 | 0.210 | 415,709   | 300,266   | 46,759  |
| 03379500  | LITTLE WABASH RIVER BELOW CLAY CITY, IL            | 5120114 | IL | 38.63345 | -88.2953 | 2,929.3  | 3/15/1984  | 12/8/1998  | 134  | 0.296 | 0.230 | 515,986   | 479,414   | 42,249  |
| 03379600  | LITTLE WABASH RIVER AT BLOOD, IL                   | 5120114 | IL | 38.51894 | -88.1319 | 3,577.7  | 10/13/1977 | 12/7/1998  | 135  | 0.293 | 0.250 | 580,606   | 605,053   | 39,669  |
| 03380500  | SKILLET FORK AT WAYNE CITY, IL                     | 5120115 | IL | 38.35867 | -88.5848 | 1,201.8  | 2/16/1984  | 12/7/1998  | 132  | 0.154 | 0.120 | 130,005   | 103,315   | 11,688  |
| 03381495  | LITTLE WABASH RIVER AT MAIN ST AT CARMI, IL        | 5120114 | IL | 38.09232 | -88.1561 | 7,997.9  | 10/29/1979 | 12/16/1998 | 180  | 0.255 | 0.220 | 1,059,437 | 1,065,232 | 66,809  |
| 03382090  | SUGAR CREEK NEAR STONEFORT, IL                     | 5140204 | IL | 37.65533 | -88.7633 | 90.7     | 10/25/1977 | 11/19/1998 | 121  | 0.625 | 0.140 | 4,054     | 5,111     | 735     |
| 03382100  | SOUTH FORK SALINE RIVER NR CARRIER MILLS, IL       | 5140204 | IL | 37.63643 | -88.6772 | 380.7    | 12/14/1977 | 12/10/1998 | 194  | 0.061 | 0.010 | 68,528    | 17,632    | 18,391  |
| 03382185  | BANKSTON FORK NEAR DORRIS HEIGHTS, IL              | 5140204 | IL | 37.76754 | -88.5404 | 201.2    | 2/2/1984   | 11/23/1998 | 135  | 0.053 | 0.020 | 13,057    | 10,894    | 2,849   |
| 03384450  | LUSK CREEK NEAR EDDYVILLE, IL                      | 5140203 | IL | 37.47253 | -88.5476 | 111.1    | 10/31/1977 | 12/23/1998 | 174  | 0.020 | 0.010 | 1,441     | 3,551     | 346     |
| 03404500  | CUMBERLAND RIVER AT CUMBERLAND FALLS, KY           | 5130101 | KY | 36.83694 | -84.3437 | 5,120.4  | 10/7/1970  | 12/11/2006 | 277  | 0.038 | 0.024 | 118,417   | 120,274   | 22,939  |
| 03428500  | WEST FORK STONES RIVER NEAR SMYRNA, TN             | 5130203 | TN | 35.94027 | -86.4649 | 613.8    | 9/29/1982  | 12/7/1998  | 31   | 0.541 | 0.210 | 70,317    | 85,234    | 11,204  |
| 03434500  | HARPEETH RIVER NEAR KINGSTON SPRINGS, TN           | 5130204 | TN | 36.122   | -87.0989 | 1,763.8  | 6/25/1975  | 10/22/1998 | 51   | 0.383 | 0.310 | 412,657   | 99,479    | 93,143  |
| 03612000  | CACHE RIVER AT FORMAN, IL                          | 5140206 | IL | 37.3352  | -88.9258 | 632.0    | 10/26/1977 | 11/16/1998 | 134  | 0.174 | 0.140 | 71,540    | 35,136    | 4,677   |
| 04024000  | ST. LOUIS RIVER AT SCANLON, MN                     | 4010201 | MN | 46.70322 | -92.4178 | 8,883.7  | 11/17/1970 | 11/20/1996 | 347  | 0.050 | 0.040 | 114,580   | 110,771   | 5,697   |
| 04024430  | NEMADJI RIVER NEAR SOUTH SUPERIOR, WI              | 4010301 | WI | 46.63326 | -92.0943 | 1,087.8  | 1/28/1974  | 3/19/1998  | 289  | 0.093 | 0.040 | 66,454    | 17,229    | 4,315   |
| 04027595  | BAD RIVER AT ODANA, WI                             | 4010302 | WI | 46.61028 | -90.6869 | 2,512.3  | 11/30/1970 | 2/7/2005   | 241  | 0.050 | 0.040 | 74,004    | 55,058    | 9,740   |
| 04040000  | ONTONAGON RIVER NEAR ROCKLAND, MI                  | 4020102 | MI | 46.7207  | -89.2075 | 3,470.6  | 10/3/1974  | 8/29/1995  | 142  | 0.052 | 0.040 | 81,788    | 42,456    | 7,368   |
| 04057005  | MANISTIQUE RIVER AT MANISTIQUE, MI                 | 4060106 | MI | 45.95164 | -86.2485 | 3,755.5  | 10/20/1970 | 10/26/1995 | 243  | 0.029 | 0.027 | 41,285    | 31,333    | 2,638   |
| 04063700  | POPPLE RIVER NEAR FENCE, WI                        | 4030108 | WI | 45.76347 | -88.4632 | 360.0    | 10/20/1970 | 9/20/2007  | 336  | 0.026 | 0.020 | 2,265     | 3,668     | 203     |
| 04067500  | MENOMINEE RIVER NEAR MC ALLISTER, WI               | 4030108 | MI | 45.32572 | -87.6621 | 10,178.7 | 10/24/1979 | 8/8/2007   | 158  | 0.027 | 0.024 | 73,721    | 146,494   | 7,513   |
| 04071000  | OCONTO RIVER NEAR GILLET, WI                       | 4030104 | WI | 44.86465 | -88.3001 | 1,826.0  | 1/29/1973  | 10/13/2003 | 207  | 0.037 | 0.027 | 11,008    | 24,131    | 1,778   |
| 04072050  | DUCK CREEK AT SEMINARY ROAD NEAR ONEIDA, WI        | 4030103 | WI | 44.46521 | -88.2187 | 247.3    | 4/7/1993   | 10/20/2004 | 108  | 0.216 | 0.189 | 9,059     | 25,511    | 863     |
| 04072150  | DUCK CREEK NEAR HOWARD, WI                         | 4030103 | WI | 44.53371 | -88.1291 | 279.7    | 9/21/1988  | 9/30/2005  | 358  | 0.199 | 0.170 | 17,295    | 25,698    | 1,293   |
| 040734644 | SILVER CREEK AT SOUTH KORO ROAD NEAR RIPON, WI     | 4030201 | WI | 43.8581  | -88.87   | 93.8     | 3/18/1987  | 10/1/1996  | 624  | 0.335 | 0.240 | 8,516     | 8,589     | 325     |
| 04073468  | GREEN LAKE INLET AT CT HIGHWAY A NR GREEN LAKE, WI | 4030201 | WI | 43.82369 | -88.9269 | 138.6    | 3/5/1987   | 9/20/2005  | 1038 | 0.150 | 0.130 | 5,557     | 10,947    | 177     |
| 04073470  | PUCHYAN RIVER AT GREEN LAKE, WI                    | 4030201 | WI | 43.84665 | -88.9601 | 266.8    | 2/19/1997  | 9/20/2005  | 122  | 0.034 | 0.031 | 2,208     | 3,806     | 151     |
| 04075050  | WOLF RIVER AT HIGHWAY M NEAR LANGLADE, WI          | 4030202 | WI | 45.12632 | -88.6635 | 1,266.5  | 1/3/1990   | 8/28/2001  | 63   | 0.027 | 0.020 | 4,491     | 13,954    | 1,542   |
| 04077100  | WOLF RIVER AT KESHENA, WI                          | 4030202 | WI | 44.88332 | -88.6348 | 2,297.8  | 5/31/1995  | 8/27/2001  | 27   | 0.025 | 0.020 |           |           |         |
| 04077630  | RED RIVER AT MORGAN ROAD NEAR MORGAN, WI           | 4030202 | WI | 44.89814 | -88.8441 | 295.3    | 11/4/1992  | 7/2/1998   | 171  | 0.028 | 0.020 | 3,076     | 5,129     | 520     |
| 04080798  | TOMORROW RIVER NEAR NELSONVILLE, WI                | 4030202 | WI | 44.52432 | -89.3381 | 114.0    | 4/9/1993   | 10/17/2002 | 38   | 0.032 | 0.020 |           |           |         |
| 04085139  | FOX RIVER AT MOUTH AT GREEN BAY, WI                | 4030103 | WI | 44.53949 | -88.0049 | 16,394.7 | 10/5/1988  | 9/15/2005  | 153  | 0.131 | 0.130 | 634,948   | 462,782   | 58,838  |
| 04085427  | MANITOWOC RIVER AT MANITOWOC, WI                   | 4030101 | WI | 44.10708 | -87.7151 | 1,362.3  | 1/24/1977  | 9/20/2007  | 227  | 0.215 | 0.190 | 50,813    | 109,088   | 3,572   |
| 04086500  | CEDAR CREEK NEAR CEDARBURG, WI                     | 4040003 | WI | 43.32308 | -87.9786 | 310.8    | 1/25/1977  | 11/8/2004  | 108  | 0.220 | 0.170 | 5,302     | 16,002    | 732     |
| 04086600  | MILWAUKEE RIVER NEAR CEDARBURG, WI                 | 4040003 | WI | 43.27999 | -87.9421 | 1,572.1  | 9/28/1994  | 9/23/2005  | 75   | 0.126 | 0.108 | 50,493    | 73,940    | 7,971   |
| 04087000  | MILWAUKEE RIVER AT MILWAUKEE, WI                   | 4040003 | WI | 43.10001 | -87.909  | 1,802.6  | 1/25/1973  | 9/26/2007  | 635  | 0.136 | 0.120 | 52,703    | 87,147    | 1,738   |
| 04087170  | MILWAUKEE RIVER AT MOUTH AT MILWAUKEE, WI          | 4060200 | WI | 43.02505 | -87.8985 | 2,258.5  | 3/29/1994  | 8/29/2005  | 47   | 0.061 | 0.058 | 47,267    | 186,977   | 3,726   |
| 04101500  | ST. JOSEPH RIVER AT NILES, MI                      | 4050001 | MI | 41.82928 | -86.2596 | 9,494.9  | 2/12/1979  | 9/22/1995  | 103  | 0.074 | 0.060 | 242,948   | 432,433   | 16,940  |
| 04102533  | ST. JOSEPH RIVER AT ST. JOSEPH, MI                 | 4050001 | MI | 42.11318 | -86.4853 | 12,095.3 | 10/22/1970 | 10/27/1995 | 278  | 0.094 | 0.080 | 385,328   | 532,721   | 12,703  |
| 04119300  | GRAND RIVER AT EASTMANVILLE, MI                    | 4050006 | MI | 43.01511 | -85.9559 | 13,545.7 | 2/14/1979  | 10/7/1994  | 98   | 0.107 | 0.100 | 438,156   | 623,305   | 34,114  |
| 04122500  | PERE MARQUETTE RIVER AT SCOTTVILLE, MI             | 4060101 | MI | 43.94469 | -86.2792 | 1,763.8  | 12/15/1970 | 10/18/1995 | 63   | 0.038 | 0.030 | 27,369    | 18,661    | 2,931   |
| 04137500  | AU SABLE RIVER NEAR AU SABLE, MI                   | 4070007 | MI | 44.43622 | -83.4344 | 4,504.0  | 6/6/1978   | 9/28/1998  | 129  | 0.015 | 0.010 | 14,514    | 40,916    | 2,383   |
| 04156100  | TITTABAWASSEE RIVER NR MIDLAND, MI                 | 4080201 | MI | 43.56864 | -84.1936 | 6,345.5  | 7/24/1980  | 9/23/1996  | 220  | 0.074 | 0.066 | 134,708   | 120,179   | 5,927   |
| 04157000  | SAGINAW RIVER AT SAGINAW, MI                       | 4080206 | MI | 43.41322 | -83.9642 | 15,695.4 | 3/12/1976  | 7/21/2005  | 66   | 0.152 | 0.126 | 278,735   | 424,307   | 33,411  |
| 04161820  | CLINTON RIVER AT STERLING HEIGHTS, MI              | 4090003 | MI | 42.61452 | -83.0262 | 800.3    | 4/4/1996   | 8/30/2005  | 81   | 0.068 | 0.059 | 16,223    | 31,941    | 1,942   |
| 04165500  | CLINTON RIVER AT MORAVIAN DRIVE AT MT. CLEMENS, MI | 4090003 | MI | 42.59572 | -82.9093 | 1,901.1  | 10/8/1974  | 8/24/1995  | 139  | 0.207 | 0.170 | 98,659    | 151,282   | 6,201   |
| 04170000  | HURON RIVER AT MILFORD, MI                         | 4090005 | MI | 42.57892 | -83.6276 | 341.9    | 4/6/1984   | 9/8/2003   | 46   | 0.049 | 0.043 | 1,578     | 15,956    | 463     |
| 04170500  | HURON RIVER NEAR NEW HUDSON, MI                    | 4090005 | MI | 42.51253 | -83.6763 | 383.3    | 4/6/1984   | 9/8/2003   | 44   | 0.042 | 0.040 | 885       | 14,356    | 386     |

Table\_S2\_TP

|            |                                                    |         |    |          |          |           |            |            |      |       |       |           |           |         |
|------------|----------------------------------------------------|---------|----|----------|----------|-----------|------------|------------|------|-------|-------|-----------|-----------|---------|
| 04175600   | RIVER RAISIN NEAR MANCHESTER, MI                   | 4100002 | MI | 42.16796 | -84.0765 | 341.9     | 4/2/1996   | 8/26/2004  | 61   | 0.020 | 0.018 | 1,930     | 6,054     | 367     |
| 04176500   | RIVER RAISIN NEAR MONROE, MI                       | 4100002 | MI | 41.96033 | -83.5311 | 2,698.8   | 1/19/1978  | 9/30/2004  | 6712 | 0.135 | 0.114 | 110,680   | 96,475    | 2,169   |
| 04178000   | ST. JOSEPH RIVER NEAR NEWVILLE, IN                 | 4100003 | IN | 41.38571 | -84.8019 | 1,579.9   | 3/7/1996   | 10/25/2004 | 89   | 0.155 | 0.128 | 110,498   | 64,322    | 12,415  |
| 04186500   | Auglaize River near Fort Jennings OH               | 4100007 | OH | 40.94899 | -84.2665 | 859.9     | 8/27/1974  | 8/9/2005   | 91   | 0.219 | 0.162 | 66,552    | 79,806    | 7,621   |
| 04198000   | Blanchard River near Findlay OH                    | 4100008 | OH | 41.05609 | -83.6879 | 896.1     | 5/14/1973  | 9/19/1996  | 135  | 1.337 | 0.670 | 153,988   | 55,908    | 25,789  |
| 04193500   | Maumee River at Waterville OH                      | 4100009 | OH | 41.50016 | -83.7139 | 16,394.7  | 10/12/1970 | 8/10/2005  | 9221 | 0.249 | 0.209 | 1,481,659 | 1,108,680 | 17,352  |
| 04197100   | Honey Creek at Melmore OH                          | 4100011 | OH | 41.02214 | -83.1096 | 385.9     | 2/2/1976   | 9/30/2004  | 9883 | 0.178 | 0.120 | 33,845    | 23,385    | 910     |
| 04198000   | Sandusky River near Fremont OH                     | 4100011 | OH | 41.30779 | -83.1584 | 3,240.1   | 4/12/1973  | 9/30/2004  | 8982 | 0.190 | 0.124 | 360,004   | 233,945   | 7,463   |
| 04199000   | Huron River at Milan OH                            | 4100012 | OH | 41.30077 | -82.6088 | 960.9     | 10/2/1973  | 8/20/1998  | 2587 | 0.278 | 0.186 | 107,714   | 90,937    | 5,406   |
| 04199500   | Vermilion River near Vermillion OH                 | 4100012 | OH | 41.38199 | -82.3169 | 678.6     | 4/12/1973  | 9/30/2004  | 1462 | 0.146 | 0.060 | 96,328    | 72,433    | 8,717   |
| 04200500   | Black River at Elyria OH                           | 4110001 | OH | 41.37967 | -82.1047 | 1,025.6   | 6/20/1973  | 12/9/1998  | 318  | 0.427 | 0.210 | 33,601    | 67,389    | 5,231   |
| 04206000   | Cuyahoga River at Old Portage OH                   | 4110002 | OH | 41.13559 | -81.5472 | 1,046.4   | 9/10/1974  | 7/15/2002  | 31   | 0.167 | 0.100 | 77,981    | 52,740    | 12,753  |
| 04208000   | Cuyahoga River at Independence OH                  | 4110002 | OH | 41.39532 | -81.6294 | 1,831.1   | 9/11/1973  | 9/30/2004  | 7652 | 0.316 | 0.240 | 185,992   | 182,041   | 2,877   |
| 04209000   | Chagrin River at Willoughby OH                     | 4110003 | OH | 41.63136 | -81.4027 | 637.1     | 8/23/1971  | 12/1/1998  | 243  | 0.132 | 0.070 | 26,265    | 36,126    | 4,961   |
| 04212100   | Grand River near Painesville OH                    | 4110004 | OH | 41.7188  | -81.2278 | 1,774.2   | 11/26/1975 | 9/30/2004  | 5196 | 0.092 | 0.050 | 91,204    | 101,219   | 2,276   |
| 04213500   | CATTARAUGUS CREEK AT GOWANDA NY                    | 4120102 | NY | 42.46389 | -78.9352 | 1,129.2   | 7/16/1975  | 2/26/1998  | 158  | 0.086 | 0.022 | 136,763   | 42,311    | 32,839  |
| 04214500   | BUFFALO CREEK AT GARDENVILLE NY                    | 4120103 | NY | 42.85478 | -78.755  | 367.8     | 10/22/1970 | 11/6/2006  | 63   | 0.049 | 0.020 | 23,993    | 20,824    | 8,312   |
| 04227000   | CANASERAGA CREEK AT SHAKERS CROSSING NY            | 4130002 | NY | 42.7371  | -77.8404 | 867.7     | 3/21/1990  | 11/8/2005  | 20   | 0.116 | 0.080 |           |           |         |
| 04229500   | HONEOYE CREEK AT HONEOYE FALLS NY                  | 4130003 | NY | 42.95681 | -77.589  | 507.6     | 3/30/1998  | 4/6/2005   | 554  | 0.093 | 0.045 | 9,750     | 23,958    | 491     |
| 04230500   | OATKA CREEK AT GARBUTT NY                          | 4130003 | NY | 43.00998 | -77.7914 | 518.0     | 3/20/1990  | 9/16/2005  | 682  | 0.055 | 0.035 | 18,003    | 49,557    | 841     |
| 04232034   | IRONDEQUOIT CR AT RAILROAD MILLS, NR FISHERS NY    | 4140101 | NY | 43.02746 | -77.4784 | 101.5     | 11/27/1991 | 9/16/2005  | 604  | 0.122 | 0.060 | 3,679     | 2,017     | 263     |
| 0423205010 | IRONDEQUOIT CR ABV BLOSSOM RD NR ROCHESTER NY      | 4140101 | NY | 43.14506 | -77.5119 | 367.8     | 12/1/1980  | 8/31/2005  | 2987 | 0.114 | 0.080 | 21,438    | 12,102    | 868     |
| 0423205025 | IRONDEQUOIT CREEK AT EMPIRE BLVD, ROCHESTER NY     | 4140101 | NY | 43.17567 | -77.5266 | 391.1     | 6/28/1990  | 12/30/2002 | 1675 | 0.130 | 0.100 | 13,223    | 12,773    | 449     |
| 04260500   | BLACK RIVER AT WATERTOWN NY                        | 4150101 | NY | 43.98543 | -75.9251 | 4,827.8   | 10/8/1970  | 8/9/1994   | 210  | 0.032 | 0.030 | 136,734   | 129,150   | 9,327   |
| 05046000   | OTTER TAIL RIVER BL LORWELL D NR FERGUS FALLS, MN  | 9020103 | MN | 46.20961 | -96.1849 | 4,506.6   | 4/18/1985  | 6/16/2003  | 66   | 0.053 | 0.042 | 32,095    | 70,214    | 4,545   |
| 05046450   | OTTER TAIL RIVER AB BRECKENRIDGE, MN               | 9020103 | MN | 46.26163 | -96.5462 | 4,382.1   | 5/20/1997  | 6/17/2003  | 48   | 0.090 | 0.080 | 65,764    | 113,048   | 20,661  |
| 05046502   | OTTER TAIL RIVER AT 11TH ST IN BRECKENRIDGE, MN    | 9020103 | MN | 46.2744  | -96.5801 | 4,416.0   | 9/1/2001   | 9/10/2007  | 130  | 0.102 | 0.092 | 59,461    | 117,277   | 5,726   |
| 05049000   | MUSTINKA RIVER AB WHEATON, MN                      | 9020102 | MN | 45.82079 | -96.4906 | 1,731.8   | 6/1/1994   | 9/4/2003   | 31   | 0.210 | 0.190 | 178,436   | 146,997   | 27,348  |
| 05051300   | BOIS DE SIOUX RIVER NEAR DORAN, MN                 | 9020101 | ND | 46.1523  | -96.5794 | 4,869.2   | 3/27/1993  | 5/24/2005  | 46   | 0.298 | 0.250 | 121,580   | 95,440    | 38,031  |
| 05051510   | RED RIVER OF THE NORTH BELOW WAHPETON, ND          | 9020104 | MN | 46.37444 | -96.658  | 10,411.8  | 10/3/1970  | 11/6/2006  | 294  | 0.202 | 0.159 | 181,760   | 232,060   | 14,908  |
| 05051522   | RED RIVER OF THE NORTH AT HICKSON, ND              | 9020104 | ND | 46.65953 | -96.7974 | 11,137.0  | 11/3/1975  | 5/12/2004  | 103  | 0.195 | 0.175 | 248,151   | 269,210   | 30,909  |
| 05053000   | WILD RICE RIVER NR ABERCROMBIE, ND                 | 9020105 | ND | 46.46758 | -96.7837 | 5,387.2   | 4/6/1993   | 11/6/2006  | 130  | 0.268 | 0.222 | 300,842   | 209,347   | 28,712  |
| 05053800   | RED RIVER OF THE NORTH ABOVE FARGO, ND             | 9020104 | ND | 46.80385 | -96.7968 | 14,660.2  | 4/4/1994   | 5/12/2004  | 45   | 0.220 | 0.210 | 600,658   | 537,061   | 135,783 |
| 05054000   | RED RIVER OF THE NORTH AT FARGO, ND                | 9020104 | ND | 46.86106 | -96.7837 | 17,612.0  | 5/8/2003   | 8/23/2005  | 30   | 0.247 | 0.203 | 700,335   | 541,126   | 176,613 |
| 05056000   | SHEYENNE RIVER NR WARWICK, ND                      | 9020203 | ND | 47.80515 | -98.7165 | 5,361.3   | 7/14/1993  | 10/3/2006  | 47   | 0.217 | 0.198 | 34,058    | 25,234    | 4,633   |
| 05057000   | SHEYENNE RIVER NR COOPERSTOWN, ND                  | 9020203 | ND | 47.43274 | -98.0277 | 16,757.3  | 3/6/1979   | 8/22/2005  | 83   | 0.229 | 0.220 | 86,083    | 81,965    | 15,762  |
| 05057200   | BALDHILL CREEK NR DAZEY, ND                        | 9020203 | ND | 47.22916 | -98.1249 | 1,789.7   | 3/21/1979  | 8/8/1995   | 48   | 0.155 | 0.110 | 18,772    | 25,824    | 3,377   |
| 05058000   | SHEYENNE RIVER BELOW BALDHILL DAM, ND              | 9020204 | ND | 47.03367 | -98.0832 | 19,347.3  | 3/21/1979  | 8/22/2005  | 45   | 0.193 | 0.190 | 76,599    | 99,852    | 10,049  |
| 05058700   | SHEYENNE RIVER AT LISBON, ND                       | 9020204 | ND | 46.44673 | -97.6795 | 21,212.1  | 2/9/1993   | 5/10/2005  | 30   | 0.252 | 0.220 | 150,079   | 146,796   | 33,254  |
| 05059000   | SHEYENNE RIVER NEAR KINDRED, ND                    | 9020204 | ND | 46.62888 | -97.0042 | 22,792.0  | 7/27/1976  | 11/6/2006  | 308  | 0.192 | 0.164 | 145,586   | 198,813   | 8,445   |
| 05062500   | WILD RICE RIVER AT TWIN VALLEY, MN                 | 9020108 | MN | 47.26558 | -96.2473 | 2,419.1   | 9/24/1974  | 4/30/1997  | 176  | 0.059 | 0.040 | 40,150    | 49,182    | 3,628   |
| 05064000   | WILD RICE RIVER AT HENDRUM, MN                     | 9020108 | MN | 47.26754 | -96.7979 | 4,040.4   | 4/6/1976   | 5/12/2004  | 115  | 0.104 | 0.060 | 125,819   | 99,968    | 53,375  |
| 05064500   | RED RIVER OF THE NORTH AT HALSTAD, MN              | 9020107 | ND | 47.35182 | -96.8439 | 56,462.0  | 1/27/1978  | 8/23/2005  | 125  | 0.332 | 0.280 | 1,112,339 | 1,260,133 | 169,498 |
| 05064900   | BEAVER CREEK NR FINLEY, ND                         | 9020109 | ND | 47.59452 | -97.7094 | 414.4     | 4/10/1974  | 8/5/1996   | 83   | 0.209 | 0.175 | 7,346     | 19,223    | 1,235   |
| 05076000   | THIEF RIVER NEAR THIEF RIVER FALLS, MN             | 9020304 | MN | 48.18555 | -96.1701 | 2,551.2   | 7/20/1992  | 9/13/2007  | 91   | 0.246 | 0.072 | 68,463    | 13,441    | 11,467  |
| 05079000   | RED LAKE RIVER AT CROOKSTON, MN                    | 9020303 | MN | 47.77596 | -96.6099 | 13,649.3  | 11/17/1972 | 8/14/2007  | 236  | 0.111 | 0.060 | 190,233   | 121,658   | 24,234  |
| 05082500   | RED RIVER OF THE NORTH AT GRAND FORKS, ND          | 9020301 | ND | 47.92705 | -97.0287 | 77,959.0  | 2/8/1993   | 2/8/2006   | 70   | 0.193 | 0.160 | 1,521,901 | 1,585,051 | 148,294 |
| 05082625   | TURTLE RIVER AT TURTLE R STATE PARK NR ARVILLA, ND | 9020307 | ND | 47.93195 | -97.5148 | 805.5     | 2/8/1993   | 8/10/2000  | 85   | 0.148 | 0.080 | 15,030    | 12,587    | 2,972   |
| 05083500   | RED RIVER OF THE NORTH AT OSLO, MN                 | 9020306 | ND | 48.19419 | -97.1411 | 80,808.0  | 3/15/1973  | 5/12/2004  | 56   | 0.331 | 0.230 |           |           |         |
| 05085000   | FOREST RIVER AT MINTO, ND                          | 9020308 | ND | 48.28611 | -97.3679 | 1,916.6   | 4/19/1994  | 2/8/2006   | 41   | 0.146 | 0.117 | 26,596    | 28,958    | 8,658   |
| 05090000   | PARK RIVER AT GRAFTON, ND                          | 9020310 | ND | 48.4247  | -97.412  | 1,800.1   | 4/19/1994  | 2/8/2006   | 36   | 0.182 | 0.142 | 36,107    | 50,451    | 10,384  |
| 05099400   | LITTLE SOUTH PEMBINA RIVER NR WALHALLA, ND         | 9020313 | ND | 48.86517 | -98.0068 | 471.4     |            |            |      | 0.332 | 0.320 |           |           |         |
| 05116500   | DES LACS RIVER AT FOXHOLM, ND                      | 9010002 | ND | 48.3705  | -101.57  | 2432+G33. | 11/5/1981  | 11/1/2006  | 116  | 0.387 | 0.301 | 5,370     | 12,911    | 619     |
| 05124480   | KAWISHIWI RIVER NEAR ELY, MN                       | 9030001 | MN | 47.92327 | -91.5342 | 657.9     | 10/21/1970 | 5/15/2001  | 108  | 0.020 | 0.010 | 1,442     | 9,123     | 411     |
| 052        | MISSISSIPPI R SHIELY CO. DOCK, GREY CLOUD ISLAND   | 7010206 | MN | 44.80278 | -93.0139 | 90,034.4  | 3/7/1975   | 2/11/1998  | 263  | 0.305 | 0.264 | 3,744,481 | 5,663,521 | 119,884 |
| 05267000   | MISSISSIPPI RIVER NEAR ROYALTON, MN                | 7010201 | MN | 45.82612 | -94.3566 | 30,044.0  | 1/22/1975  | 8/5/1998   | 173  | 0.044 | 0.040 | 243,125   | 359,450   | 18,369  |
| 05280000   | CROW RIVER AT ROCKFORD, MN                         | 7010204 | MN | 45.08659 | -93.7341 | 6,837.6   | 4/28/1971  | 9/18/2006  | 108  | 0.324 | 0.320 | 423,981   | 515,597   | 20,950  |
| 05283500   | MISSISSIPPI RIVER AT ANOKA, MN                     | 7010206 | MN | 45.19163 | -93.3947 | 44,755.2  | 8/6/1998   | 8/6/1998   | 1    | 0.113 | 0.113 |           |           |         |
| 05286000   | RUM RIVER NEAR ST. FRANCIS, MN                     | 7010207 | MN | 45.32757 | -93.3727 | 3,522.4   | 4/2/1997   | 4/2/1997   | 1    | 0.190 | 0.190 |           |           |         |
| 05287890   | ELM CREEK NR CHAMPLIN, MN                          | 7010206 | MN | 45.1633  | -93.4365 | 222.7     | 2/26/1988  | 9/8/2005   | 321  | 0.177 | 0.140 | 10,398    | 10,469    | 709     |



Table\_S2\_TP

|          |                                                    |         |    |          |          |           |            |            |     |       |       |           |            |         |  |  |  |
|----------|----------------------------------------------------|---------|----|----------|----------|-----------|------------|------------|-----|-------|-------|-----------|------------|---------|--|--|--|
| 05288500 | MISSISSIPPI RIVER NEAR ANOKA, MN                   | 7010206 | MN | 45.12671 | -93.2964 | 49,469.0  | 4/4/1996   | 8/7/1998   | 25  | 0.071 | 0.069 |           |            |         |  |  |  |
| 05291000 | WHETSTONE RIVER NEAR BIG STONE CITY, SD            | 7020001 | SD | 45.29189 | -96.4872 | 1,030.8   | 4/11/1983  | 1/13/2005  | 112 | 0.208 | 0.168 | 15,560    | 38,381     | 2,179   |  |  |  |
| 05294000 | PHOMET DE TERRE RIVER AT APPLETON, MN              | 7020002 | MN | 45.20355 | -96.0195 | 2,344.0   | 8/11/1971  | 9/27/2007  | 325 | 0.203 | 0.177 | 52,138    | 132,420    | 3,268   |  |  |  |
| 05316500 | REDWOOD RIVER NEAR REDWOOD FALLS, MN               | 7020006 | MN | 44.52366 | -95.1717 | 1,629.1   | 6/20/1990  | 9/6/2007   | 206 | 0.525 | 0.397 | 169,966   | 181,631    | 14,027  |  |  |  |
| 05317000 | COTTONWOOD RIVER NEAR NEW ULM, MN                  | 7020008 | MN | 44.29119 | -94.4405 | 3,367.0   | 8/23/1989  | 9/6/2007   | 201 | 0.176 | 0.107 | 369,055   | 263,462    | 43,666  |  |  |  |
| 05319500 | WATONWAN RIVER NEAR GARDEN CITY, MN                | 7020010 | MN | 44.0465  | -94.1948 | 2,204.1   | 9/14/1976  | 9/27/2007  | 445 | 0.283 | 0.238 | 151,505   | 214,172    | 5,505   |  |  |  |
| 05320270 | LITTLE COBB RIVER NEAR BEAUFORD, MN                | 7020011 | MN | 43.99641 | -93.9087 | 336.7     | 4/24/1996  | 9/7/2005   | 98  | 0.203 | 0.166 | 13,433    | 31,197     | 1,949   |  |  |  |
| 05322000 | BLUE EARTH RIVER AT MOUTH AT MANKATO, MN           | 7020007 | MN | 44.1633  | -94.0369 | 9,056.9   | 10/6/1970  | 9/21/2006  | 528 | 0.237 | 0.198 | 463,675   | 1,075,196  | 29,968  |  |  |  |
| 05325000 | MINNESOTA RIVER AT MANKATO, MN                     | 7020007 | MN | 44.16966 | -94.0031 | 38,591.0  | 3/4/1994   | 8/27/1997  | 93  | 0.206 | 0.220 | 1,805,372 | 2,758,729  | 283,361 |  |  |  |
| 05330000 | MINNESOTA RIVER NEAR JORDAN, MN                    | 7020012 | MN | 44.69314 | -93.6419 | 41,958.0  | 10/20/1971 | 9/3/1998   | 229 | 0.230 | 0.200 | 1,319,204 | 2,978,117  | 102,350 |  |  |  |
| 05331000 | MISSISSIPPI RIVER AT ST. PAUL, MN                  | 7010206 | MN | 44.93309 | -93.1046 | 95,312.0  | 10/4/1972  | 8/22/1996  | 329 | 0.217 | 0.180 | 3,695,044 | 4,651,807  | 137,344 |  |  |  |
| 05331570 | MISSISSIPPI RIVER AT NININGER, MN                  | 7010206 | MN | 44.77583 | -92.8984 | 95,830.0  | 10/18/1977 | 9/8/1995   | 95  | 0.234 | 0.220 | 3,110,157 | 5,675,694  | 158,813 |  |  |  |
| 05331580 | MISSISSIPPI RIVER BELOW L&D #2 AT HASTINGS, MN     | 7010206 | MN | 44.74663 | -92.8524 | 96,089.0  | 10/2/1995  | 8/13/2004  | 96  | 0.203 | 0.196 | 2,596,869 | 5,696,120  | 162,930 |  |  |  |
| 05333500 | ST. CROIX RIVER NEAR DANBURY, WI                   | 7030001 | WI | 46.07524 | -92.2477 | 4,092.2   | 10/23/1975 | 11/16/2004 | 121 | 0.023 | 0.020 | 25,933    | 33,952     | 2,905   |  |  |  |
| 05338500 | SNAKE RIVER NEAR PINE CITY, MN                     | 7030004 | MN | 45.84057 | -92.9319 | 2,522.7   | 8/4/1971   | 10/10/2006 | 164 | 0.106 | 0.080 | 49,755    | 62,447     | 3,157   |  |  |  |
| 05340500 | ST. CROIX RIVER AT ST. CROIX FALLS, WI             | 7030005 | MN | 45.40688 | -92.6482 | 16,161.6  | 10/2/1974  | 5/8/2007   | 197 | 0.040 | 0.036 | 196,464   | 262,216    | 16,930  |  |  |  |
| 05355200 | CANNON RIVER AT WELCH, MN                          | 7040002 | MN | 44.5645  | -92.7316 | 3,470.6   | 10/30/1991 | 8/21/2007  | 78  | 0.274 | 0.212 | 198,532   | 236,461    | 18,183  |  |  |  |
| 05367500 | RED CEDAR RIVER NEAR COLFAX, WI                    | 7050007 | WI | 45.05308 | -91.7119 | 2,823.1   | 10/2/1989  | 10/15/2003 | 125 | 0.181 | 0.135 | 136,511   | 77,747     | 16,086  |  |  |  |
| 05368000 | HAY RIVER AT WHEELER, WI                           | 7050007 | WI | 45.04785 | -91.9111 | 1,082.6   | 10/2/1989  | 10/17/2002 | 118 | 0.140 | 0.094 | 50,248    | 45,234     | 6,382   |  |  |  |
| 05369500 | CHIPPEWA RIVER AT DURAND, WI                       | 7050005 | WI | 44.62891 | -91.9702 | 23,335.9  | 10/2/1974  | 9/5/2007   | 328 | 0.098 | 0.086 | 670,992   | 511,878    | 24,950  |  |  |  |
| 05378183 | JOOS VALLEY CREEK NEAR FOUNTAIN CITY, WI           | 7040003 | WI | 44.21479 | -91.6651 | 15.3      | 8/8/1990   | 9/30/2007  | 399 | 0.544 | 0.054 | 5,206     | 862        | 2,578   |  |  |  |
| 05378185 | EAGLE CREEK AT CT HIGHWAY G NEAR FOUNTAIN CITY, WI | 7040003 | WI | 44.2094  | -91.6784 | 37.0      | 8/8/1990   | 9/25/2005  | 340 | 0.554 | 0.070 | 9,442     | 2,052      | 3,978   |  |  |  |
| 05378500 | MISSISSIPPI RIVER AT WINONA, MN                    | 7040003 | MN | 44.05672 | -91.6367 | 153,328.0 | 12/3/1970  | 8/20/1986  | 112 | 0.151 | 0.150 | 4,993,905 | 7,242,983  | 209,712 |  |  |  |
| 05379500 | TREMPLEALEU RIVER AT DODGE, WI                     | 7040005 | WI | 44.1316  | -91.5531 | 1,665.4   | 1/24/1977  | 9/18/2007  | 128 | 0.389 | 0.362 | 269,058   | 76,532     | 15,263  |  |  |  |
| 05382000 | BLACK RIVER NEAR GALESVILLE, WI                    | 7040007 | WI | 44.06063 | -91.2872 | 5,387.2   | 10/6/1970  | 9/18/2007  | 264 | 0.149 | 0.140 | 297,770   | 205,199    | 13,895  |  |  |  |
| 05388250 | Upper Iowa River near Dorchester, IA               | 7060002 | IA | 43.42111 | -91.5088 | 1,994.3   | 4/21/1999  | 9/12/2007  | 81  | 0.256 | 0.140 | 235,284   | 188,333    | 38,675  |  |  |  |
| 054      | MISSISSIPPI RIVER AT BR ON MN-25 AT MONTICELLO     | 7010203 | MN | 45.30886 | -93.7919 | 34,018.7  | 9/30/1988  | 9/7/1994   | 55  | 0.084 | 0.078 | 409,638   | 663,682    | 38,988  |  |  |  |
| 05401050 | TENMILE CREEK NEAR NEKOOSA, WI                     | 7070003 | WI | 44.26262 | -89.8106 | 189.8     | 11/15/1973 | 10/17/2002 | 43  | 0.034 | 0.030 | 2,261     | 5,495      | 416     |  |  |  |
| 05405000 | BARABOO RIVER NEAR BARABOO, WI                     | 7070004 | WI | 43.48174 | -89.6365 | 1,577.3   | 2/28/1977  | 9/17/2007  | 91  | 0.214 | 0.200 | 104,956   | 87,170     | 6,448   |  |  |  |
| 05406491 | GARFOOT CREEK NEAR CROSS PLAINS, WI                | 7070005 | WI | 43.10988 | -89.6794 | 14.0      | 10/16/1984 | 6/15/2001  | 359 | 0.408 | 0.140 | 1,378     | 647        | 181     |  |  |  |
| 05406500 | BLACK EARTH CREEK AT BLACK EARTH, WI               | 7070005 | WI | 43.13388 | -89.7325 | 118.1     | 4/28/1976  | 8/14/2003  | 84  | 0.233 | 0.100 | 6,435     | 5,616      | 1,287   |  |  |  |
| 05407000 | WISCONSIN RIVER AT MUSCODA, WI                     | 7070005 | WI | 43.1995  | -90.4433 | 26,936.0  | 10/24/1974 | 9/17/2007  | 225 | 0.086 | 0.080 | 703,576   | 1,280,826  | 35,425  |  |  |  |
| 05407500 | KICKAPOO RIVER AT ONTARIO, WI                      | 7070006 | WI | 43.71476 | -90.5869 | 388.5     | 1/17/1974  | 12/2/1998  | 221 | 0.149 | 0.120 | 19,578    | 27,289     | 2,838   |  |  |  |
| 05412500 | Turkey River at Garber, IA                         | 7060004 | IA | 42.73972 | -91.2616 | 4,001.6   | 10/30/1979 | 9/12/2007  | 134 | 0.429 | 0.128 | 769,794   | 406,452    | 141,964 |  |  |  |
| 05413500 | GRANT RIVER AT BURTON, WI                          | 7060003 | WI | 42.72037 | -90.8195 | 696.7     | 11/19/1986 | 10/16/2003 | 53  | 0.206 | 0.170 | 29,602    | 77,294     | 6,123   |  |  |  |
| 05418500 | Maquoketa River near Maquoketa, IA                 | 7060006 | IA | 42.08363 | -90.6325 | 4,022.3   | 12/9/1970  | 6/5/2002   | 64  | 0.402 | 0.220 | 506,464   | 404,612    | 220,308 |  |  |  |
| 05418950 | APPLE RIVER NEAR ELIZABETH, IL                     | 7060005 | IL | 42.31862 | -90.2543 | 536.1     | 3/20/1978  | 12/9/1998  | 142 | 0.223 | 0.145 | 49,873    | 42,833     | 7,412   |  |  |  |
| 05420500 | Mississippi River at Clinton, IA                   | 7080101 | IL | 41.77928 | -90.2511 | 221,704.0 | 2/11/1974  | 9/7/2005   | 284 | 0.178 | 0.168 | 8,678,151 | 11,044,731 | 356,110 |  |  |  |
| 05420680 | Wapsipinicon River near Tripoli, IA                | 7080102 | IA | 42.83627 | -92.2571 | 896.1     | 4/18/1996  | 8/3/2004   | 73  | 0.131 | 0.096 | 48,007    | 54,930     | 8,038   |  |  |  |
| 05422000 | Wapsipinicon River near De Witt, IA                | 7080103 | IA | 41.76649 | -90.5347 | 6,050.2   | 3/14/1996  | 9/5/2007   | 147 | 0.251 | 0.209 | 587,571   | 361,295    | 45,422  |  |  |  |
| 05423000 | WEST BRANCH ROCK R NEAR WAUPUN, WI                 | 7090001 | WI | 43.66803 | -88.6524 | 105.4     | 3/30/1998  | 12/12/2000 | 81  | 1.161 | 1.210 | 15,476    | 9,373      | 1,013   |  |  |  |
| 05423510 | WEST BRANCH ROCK R @ STATE HWY 49 NR WAUPUN,WI     | 7090001 | WI | 43.63383 | -88.6846 | 292.7     | 11/19/1997 | 10/14/2002 | 159 | 1.666 | 1.290 | 42,001    | 55,144     | 5,342   |  |  |  |
| 05424057 | ROCK RIVER AT HORICON, WI                          | 7090001 | WI | 43.4501  | -88.6323 | 1,181.0   | 11/19/1997 | 12/5/2002  | 242 | 0.399 | 0.370 | 202,270   | 109,754    | 14,795  |  |  |  |
| 05424082 | ROCK RIVER AT HUSTISFORD, WI                       | 7090001 | WI | 43.34537 | -88.598  | 1,323.5   | 4/6/1978   | 11/19/2002 | 161 | 0.437 | 0.380 | 108,016   | 107,847    | 4,575   |  |  |  |
| 05425500 | ROCK RIVER AT WATERTOWN, WI                        | 7090001 | WI | 43.18806 | -88.7265 | 2,509.7   | 9/1/1998   | 11/30/2004 | 95  | 0.240 | 0.259 | 136,687   | 162,969    | 6,656   |  |  |  |
| 05426000 | CRAWFISH RIVER AT MILFORD, WI                      | 7090002 | WI | 43.09992 | -88.8497 | 1,973.6   | 2/11/1977  | 10/14/2003 | 180 | 0.384 | 0.330 | 129,704   | 103,730    | 5,202   |  |  |  |
| 05427085 | ROCK RIVER AT ROBERT STREET AT FORT ATKINSON, WI   | 7090001 | WI | 42.92751 | -88.8429 | 5,801.6   | 10/6/1998  | 10/14/2003 | 66  | 0.300 | 0.306 | 361,048   | 390,955    | 32,674  |  |  |  |
| 05427570 | ROCK RIVER AT INDIANFORD, WI                       | 7090001 | WI | 42.80392 | -89.0892 | 6,811.7   | 1/27/1977  | 9/12/2000  | 279 | 0.299 | 0.260 | 301,809   | 402,181    | 18,455  |  |  |  |
| 05430175 | YAHARA RIVER NEAR FULTON, WI                       | 7090001 | WI | 42.82649 | -89.1725 | 1,341.6   | 7/26/1977  | 10/14/2003 | 96  | 0.707 | 0.293 | 67,337    | 36,134     | 6,564   |  |  |  |
| 05430500 | ROCK RIVER AT AFTON, WI                            | 7090001 | WI | 42.60937 | -89.0704 | 8,650.6   | 10/28/1970 | 9/19/2007  | 269 | 0.371 | 0.320 | 390,633   | 451,527    | 14,774  |  |  |  |
| 05431486 | TURTLE CK AT CARVERS ROCK ROAD NEAR CLINTON, WI    | 7090001 | WI | 42.59752 | -88.829  | 515.4     | 9/2/1998   | 10/17/2002 | 67  | 0.180 | 0.140 | 18,881    | 25,832     | 4,332   |  |  |  |
| 05434500 | PECATONICA RIVER AT MARTINTOWN, WI                 | 7090003 | WI | 42.50961 | -89.7993 | 2,678.1   | 12/8/1970  | 9/18/2007  | 93  | 0.211 | 0.190 | 181,948   | 247,602    | 15,825  |  |  |  |
| 05435500 | PECATONICA RIVER AT FREEPORTE, IL                  | 7090003 | IL | 42.30304 | -89.619  | 3,434.3   | 10/11/1977 | 11/18/1998 | 139 | 0.269 | 0.260 | 285,035   | 343,636    | 16,495  |  |  |  |
| 05435800 | PECATONICA RIVER AT HARRISON, IL                   | 7090003 | IL | 42.42751 | -89.1957 | 4,630.9   | 12/20/1977 | 11/17/1998 | 143 | 0.288 | 0.270 | 416,180   | 499,870    | 20,515  |  |  |  |
| 05437500 | ROCK RIVER AT ROCKTON, IL                          | 7090005 | IL | 42.44956 | -89.0697 | 16,480.2  | 12/20/1977 | 9/12/2000  | 243 | 0.298 | 0.260 | 1,067,583 | 1,170,911  | 59,478  |  |  |  |
| 05438250 | COON CREEK AT RILEY, IL                            | 7090006 | IL | 42.1828  | -88.6413 | 220.4     | 5/9/1983   | 12/11/1998 | 141 | 0.105 | 0.070 | 3,624     | 12,217     | 318     |  |  |  |
| 05438600 | KISHWAUKEE R AB SOUTH BRANCH NR PERRYVILLE, IL     | 7090006 | IL | 42.2018  | -88.9792 | 1,696.5   | 12/20/1977 | 12/10/1998 | 147 | 0.148 | 0.120 | 59,108    | 99,950     | 3,411   |  |  |  |
| 05439500 | SOUTH BRANCH KISHWAUKEE RIVER NR FAIRDALE IL       | 7090006 | IL | 42.11032 | -88.9008 | 1,002.3   | 12/21/1977 | 12/10/1998 | 148 | 0.342 | 0.270 | 74,709    | 117,675    | 5,167   |  |  |  |
| 05440000 | KISHWAUKEE RIVER NEAR PERRYVILLE, IL               | 7090006 | IL | 42.19379 | -89.0002 | 2,846.4   | 3/16/1978  | 11/6/1998  | 142 | 0.191 | 0.150 | 142,212   | 227,204    | 9,318   |  |  |  |
| 05440700 | ROCK RIVER AT BYRON, IL                            | 7090005 | IL | 42.12273 | -89.2557 | 19,456.8  | 12/21/1977 | 12/16/1998 | 183 | 0.302 | 0.290 | 1,638,310 | 1,536,564  | 52,640  |  |  |  |

Table\_S2\_TP

|           |                                                    |         |    |          |          |           |            |            |     |       |       |            |            |           |
|-----------|----------------------------------------------------|---------|----|----------|----------|-----------|------------|------------|-----|-------|-------|------------|------------|-----------|
| 05442200  | ROCK RIVER AT GRAND DETOUR, IL                     | 7090005 | IL | 41.88998 | -89.4206 | 22,020.2  | 12/21/1977 | 12/16/1998 | 165 | 0.299 | 0.280 | 1,880,722  | 1,633,532  | 70,483    |
| 05443500  | ROCK RIVER AT COMO, IL                             | 7090005 | IL | 41.78184 | -89.7504 | 22,670.3  | 10/17/1977 | 12/16/1998 | 184 | 0.312 | 0.290 | 2,021,341  | 1,634,115  | 61,518    |
| 05444000  | ELKHORN CREEK NEAR PENROSE, IL                     | 7090005 | IL | 41.90255 | -89.6967 | 378.1     | 7/7/1983   | 12/17/1998 | 141 | 0.237 | 0.150 | 31,373     | 45,565     | 4,621     |
| 05446500  | ROCK RIVER NEAR JOSLIN, IL                         | 7090005 | IL | 41.55601 | -90.1853 | 24,731.9  | 11/13/1974 | 12/16/1998 | 241 | 0.311 | 0.290 | 1,689,196  | 1,813,539  | 124,230   |
| 05447500  | GREEN RIVER NEAR GENESEO, IL                       | 7090007 | IL | 41.48886 | -90.1578 | 2,597.8   | 12/27/1977 | 12/16/1998 | 176 | 0.215 | 0.120 | 154,287    | 141,485    | 13,553    |
| 05449500  | Iowa River near Rowan, IA                          | 7080207 | IA | 42.75993 | -93.6223 | 1,082.6   | 3/28/1983  | 11/7/2006  | 169 | 0.213 | 0.181 | 91,935     | 102,625    | 7,715     |
| 05451210  | South Fork Iowa River NE of New Providence, IA     | 7080207 | IA | 42.31483 | -93.1524 | 580.2     | 3/19/1996  | 6/2/2005   | 104 | 0.173 | 0.065 | 29,029     | 95,328     | 6,168     |
| 05453100  | Iowa River at Marengo, IA                          | 7080208 | IA | 41.81218 | -92.0643 | 7,236.5   | 5/23/1985  | 9/4/1998   | 42  | 0.421 | 0.343 | 787,093    | 772,510    | 80,607    |
| 05455100  | Old Mans Creek near Iowa City, IA                  | 7080209 | IA | 41.60642 | -91.6157 | 520.6     | 6/14/1995  | 9/4/2007   | 213 | 0.311 | 0.170 | 83,306     | 70,329     | 10,229    |
| 05458000  | Little Cedar River near Ionia, IA                  | 7080201 | IA | 43.03352 | -92.5037 | 792.5     | 4/19/2001  | 12/8/2004  | 37  | 0.371 | 0.150 | 131,375    | 61,847     | 45,569    |
| 05458900  | West Fork Cedar River at Finchford, IA             | 7080204 | IA | 42.62936 | -92.5432 | 2,191.1   | 1/12/1978  | 9/4/2007   | 243 | 0.186 | 0.130 | 170,572    | 157,909    | 11,261    |
| 05463050  | Cedar River at Cedar Falls, IA                     | 7080205 | IA | 42.53935 | -92.4497 | 12,261.1  | 7/8/1974   | 9/4/2007   | 193 | 0.200 | 0.170 | 766,540    | 835,193    | 53,805    |
| 05464020  | Cedar River at Gilbertville, IA                    | 7080205 | IA | 42.41582 | -92.2188 | 13,571.6  | 10/6/1970  | 9/4/2007   | 207 | 0.299 | 0.250 | 864,621    | 954,372    | 58,750    |
| 05464220  | Wolf Creek near Dysart, IA                         | 7080205 | IA | 42.2517  | -92.2988 | 774.4     | 3/21/1996  | 5/24/2004  | 56  | 0.255 | 0.130 | 54,051     | 76,999     | 15,827    |
| 05464760  | Cedar River near Bertram, IA                       | 7080206 | IA | 41.92572 | -91.5502 | 18,013.5  | 7/8/1974   | 9/5/2007   | 194 | 0.365 | 0.330 | 1,441,426  | 1,262,778  | 105,810   |
| 05465500  | Iowa River at Wapello, IA                          | 7080209 | IA | 41.17835 | -91.181  | 32,375.0  | 11/1/1983  | 9/1/2005   | 194 | 0.310 | 0.280 | 2,823,764  | 2,747,743  | 164,947   |
| 05466500  | EDWARDS RIVER NEAR NEW BOSTON, IL                  | 7080104 | IL | 41.18696 | -90.9676 | 1,152.6   | 1/18/1978  | 12/16/1998 | 138 | 0.295 | 0.164 | 137,844    | 103,623    | 16,048    |
| 05469000  | HENDERSON CREEK NEAR OQUAWKA, IL                   | 7080104 | IL | 41.00188 | -90.8543 | 1,118.9   | 2/8/1984   | 12/16/1998 | 125 | 0.712 | 0.485 | 116,139    | 117,825    | 8,668     |
| 05471500  | South Skunk River near Oskaloosa, IA               | 7080105 | IA | 41.35524 | -92.6571 | 4,234.7   | 10/11/1999 | 9/11/2007  | 93  | 0.405 | 0.290 | 641,787    | 427,950    | 86,151    |
| 05474000  | Skunk River at Augusta, IA                         | 7080107 | IA | 40.75317 | -91.2761 | 11,168.1  | 11/9/1977  | 9/7/2005   | 195 | 0.345 | 0.240 | 1,247,269  | 1,297,934  | 107,353   |
| 05474500  | Mississippi River at Keokuk, IA                    | 7080104 | IL | 40.39247 | -91.3718 | 308,210.0 | 3/17/1975  | 7/22/1999  | 142 | 0.237 | 0.200 | 14,511,018 | 17,976,380 | 1,021,564 |
| 05476000  | DES MOINES RIVER AT JACKSON, MN                    | 7100002 | MN | 43.61937 | -94.9843 | 3,237.5   | 10/12/1972 | 6/29/1976  | 39  | 0.284 | 0.260 | 135,251    | 227,147    | 19,705    |
| 05481650  | Des Moines River near Saylorville, IA              | 7100004 | IA | 41.68033 | -93.6688 | 15,128.2  | 7/14/1975  | 9/6/2007   | 118 | 0.190 | 0.140 | 533,705    | 1,140,303  | 48,477    |
| 05484500  | Raccoon River at Van Meter, IA                     | 7100006 | IA | 41.53414 | -93.9499 | 8,912.2   | 7/14/1975  | 9/6/2007   | 176 | 0.273 | 0.185 | 703,714    | 752,322    | 66,391    |
| 05486000  | North River near Norwalk, IA                       | 7100008 | IA | 41.45784 | -93.655  | 903.9     | 7/15/1987  | 9/6/2007   | 235 | 0.413 | 0.300 | 55,579     | 72,838     | 6,796     |
| 05490600  | Des Moines River at St. Francisville, MO           | 7100009 | IA | 40.46211 | -91.5671 | 37,037.0  | 10/19/1970 | 11/2/2006  | 275 | 0.266 | 0.220 | 2,619,575  | 2,961,891  | 184,432   |
| 05495000  | Fox River at Wayland, MO                           | 7110001 | MO | 40.39215 | -91.5981 | 1,036.0   | 10/19/1970 | 9/7/2005   | 57  | 0.257 | 0.120 | 176,411    | 117,454    | 46,034    |
| 05495500  | BEAR CREEK NEAR MARCELLINE, IL                     | 7110001 | IL | 40.14358 | -91.3415 | 903.9     | 2/2/1984   | 12/22/1998 | 136 | 0.266 | 0.150 | 151,377    | 116,703    | 23,264    |
| 05500000  | South Fabius River near Taylor, MO                 | 7110003 | MO | 39.89678 | -91.5799 | 1,605.8   | 7/18/1972  | 9/7/2005   | 260 | 0.154 | 0.095 | 124,810    | 158,098    | 13,111    |
| 05514500  | Cuivre River near Troy, MO                         | 7110008 | MO | 39.00937 | -90.9764 | 2,338.8   | 7/19/1972  | 9/7/2005   | 160 | 0.154 | 0.095 | 313,064    | 341,205    | 42,665    |
| 05518000  | KANKAKEE RIVER AT SHELBY, IN                       | 7120001 | IN | 41.18248 | -87.3435 | 4,607.6   | 1/6/1976   | 2/15/2006  | 327 | 0.149 | 0.080 | 154,480    | 179,914    | 9,635     |
| 05520500  | KANKAKEE RIVER AT MOMENCE, IL                      | 7120001 | IL | 41.15944 | -87.6682 | 5,941.5   | 1/19/1978  | 2/21/2001  | 232 | 0.093 | 0.070 | 210,048    | 220,877    | 17,127    |
| 05525000  | IROQUOIS RIVER AT IROQUOIS, IL                     | 7120002 | IL | 40.82321 | -87.5818 | 1,776.7   | 4/10/1984  | 12/9/1998  | 135 | 0.136 | 0.130 | 77,497     | 76,418     | 5,679     |
| 05525500  | SUGAR CREEK AT MILFORD, IL                         | 7120002 | IL | 40.63164 | -87.7243 | 1,155.1   | 7/30/1981  | 12/15/2004 | 208 | 0.137 | 0.084 | 86,209     | 103,428    | 10,367    |
| 05526000  | IROQUOIS RIVER NEAR CHEBANSE, IL                   | 7120002 | IL | 41.00908 | -87.8253 | 5,415.7   | 4/21/1978  | 2/21/2001  | 214 | 0.147 | 0.120 | 390,669    | 320,874    | 36,554    |
| 05527500  | KANKAKEE RIVER NEAR WILMINGTON, IL                 | 7120001 | IL | 41.34607 | -88.1881 | 13,338.5  | 12/14/1977 | 12/2/1998  | 207 | 0.119 | 0.090 | 720,763    | 658,735    | 57,770    |
| 05527800  | DES PLAINES RIVER AT RUSSELL, IL                   | 7120004 | IL | 42.48755 | -87.9255 | 318.6     | 12/29/1977 | 8/9/2001   | 190 | 0.186 | 0.160 | 11,637     | 22,221     | 850       |
| 05528000  | DES PLAINES RIVER NEAR GURNEE, IL                  | 7120004 | IL | 42.34398 | -87.9406 | 600.9     | 12/20/1977 | 12/1/1998  | 179 | 0.767 | 0.590 | 85,857     | 57,673     | 3,446     |
| 05529000  | DES PLAINES RIVER NEAR DES PLAINES, IL             | 7120004 | IL | 42.08194 | -87.8903 | 932.4     | 1/18/1978  | 12/1/1998  | 150 | 0.704 | 0.610 | 139,896    | 100,761    | 5,192     |
| 05530500  | DES PLAINES RIVER NEAR SCHILLER PARK, IL           | 7120004 | IL | 41.95333 | -87.8546 | 1,150.0   | 9/19/1978  | 11/30/1998 | 183 | 0.681 | 0.590 | 190,196    | 148,698    | 7,719     |
| 05531500  | SALT CREEK AT WESTERN SPRINGS, IL                  | 7120004 | IL | 41.82604 | -87.9    | 297.9     | 12/14/1977 | 8/17/2005  | 272 | 1.595 | 1.500 | 181,607    | 68,549     | 6,613     |
| 05532500  | DES PLAINES RIVER AT RIVERSIDE, IL                 | 7120004 | IL | 41.82278 | -87.8201 | 1,631.7   | 4/9/1987   | 8/18/2004  | 190 | 0.871 | 0.765 | 457,766    | 242,798    | 21,884    |
| 05534050  | DES PLAINES RIVER AT LOCKPORT, IL                  | 7120004 | IL | 41.59642 | -88.0686 | 1,813.0   | 1/19/1978  | 12/3/1998  | 167 | 0.761 | 0.680 | 418,734    | 1,029,361  | 14,937    |
| 05536195  | LITTLE CALUMET RIVER AT MUNSTER, IND.              | 7120003 | IN | 41.57715 | -87.5223 | 233.1     | 2/24/1971  | 2/6/2006   | 511 | 0.783 | 0.540 | 20,510     | 16,489     | 1,020     |
| 05536995  | CHICAGO SANITARY AND SHIP CANAL AT ROMEOVILLE, IL  | 7120004 | IL | 41.64088 | -88.06   | 1,914.0   | 4/9/1987   | 2/21/2001  | 92  | 1.014 | 0.864 | 3,802,886  | 742,978    | 374,169   |
| 05539000  | HICKORY CREEK AT JOLIET, IL                        | 7120004 | IL | 41.51445 | -88.0741 | 278.4     | 6/14/1979  | 12/3/1998  | 147 | 0.444 | 0.390 | 37,017     | 26,030     | 2,663     |
| 05539900  | WEST BRANCH DU PAGE RIVER NEAR WEST CHICAGO, IL    | 7120004 | IL | 41.91086 | -88.1792 | 73.8      | 6/18/1979  | 12/2/1998  | 147 | 1.537 | 1.430 | 43,523     | 18,445     | 1,020     |
| 05540095  | WEST BRANCH DU PAGE RIVER NEAR WARRENVILLE, IL     | 7120004 | IL | 41.82189 | -88.1724 | 234.1     | 12/19/1977 | 12/2/1998  | 174 | 1.265 | 1.200 | 87,719     | 66,099     | 1,988     |
| 05540210  | EAST BRANCH DU PAGE RIVER AT ROUTE 34 AT LISLE, IL | 7120004 | IL | 41.80059 | -88.0815 | 133.1     | 11/14/1977 | 12/2/1998  | 168 | 1.431 | 1.248 | 55,051     | 48,434     | 1,838     |
| 05540290  | DU PAGE RIVER NEAR NAPERVILLE, IL                  | 7120004 | IL | 41.69003 | -88.1662 | 569.8     | 10/7/1988  | 12/8/1998  | 91  | 1.206 | 1.115 | 197,083    | 161,737    | 5,611     |
| 05540500  | DU PAGE RIVER AT SHOREWOOD, IL                     | 7120004 | IL | 41.5223  | -88.1932 | 839.2     | 1/19/1978  | 8/20/1993  | 127 | 0.992 | 0.960 | 268,549    | 180,488    | 14,568    |
| 05542000  | MAZON RIVER NEAR COAL CITY, IL                     | 7120005 | IL | 41.28711 | -88.3606 | 1,178.5   | 5/2/1978   | 12/2/1998  | 117 | 0.096 | 0.070 | 23,753     | 96,566     | 2,698     |
| 05543500  | ILLINOIS RIVER AT MARSEILLES, IL                   | 7120005 | IL | 41.3259  | -88.7181 | 21,390.8  | 11/13/1974 | 12/15/1998 | 294 | 0.488 | 0.450 | 3,421,828  | 2,907,198  | 164,519   |
| 055451345 | WHITE RIVER AT CENTER STREET AT LAKE GENEVA, WI    | 7120006 | WI | 42.59057 | -88.4337 | 75.1      | 10/1/1997  | 7/7/2005   | 125 | 0.023 | 0.012 | 243        | 395        | 62        |
| 05546700  | FOX RIVER NEAR CHANNEL LAKE, IL                    | 7120006 | IL | 42.47919 | -88.1783 | 2,255.9   | 11/8/1977  | 12/1/1998  | 198 | 0.227 | 0.120 | 97,199     | 145,017    | 6,426     |
| 05548280  | NIPPERSINK CREEK NEAR SPRING GROVE, IL             | 7120006 | IL | 42.44352 | -88.2472 | 497.3     | 12/29/1977 | 12/1/1998  | 197 | 0.149 | 0.120 | 18,843     | 24,344     | 1,022     |
| 05549600  | FOX RIVER AT BURTONS BRIDGE, IL                    | 7120006 | IL | 42.27948 | -88.2271 | 3,232.1   | 7/26/1979  | 12/17/1998 | 176 | 0.132 | 0.120 | 104,538    | 177,220    | 3,728     |
| 05550000  | FOX RIVER AT ALGONQUIN, IL                         | 7120006 | IL | 42.16596 | -88.2904 | 3,633.8   | 11/8/1977  | 12/7/1998  | 212 | 0.173 | 0.140 | 142,700    | 209,266    | 5,010     |
| 05551000  | FOX RIVER AT SOUTH ELGIN, IL                       | 7120007 | IL | 41.9962  | -88.2941 | 4,030.0   | 11/10/1977 | 12/7/1998  | 198 | 0.245 | 0.200 | 216,376    | 249,370    | 6,895     |
| 05551700  | BLACKBERRY CREEK NEAR YORKVILLE, IL                | 7120007 | IL | 41.67123 | -88.4462 | 181.8     | 12/14/1977 | 12/10/1998 | 201 | 0.131 | 0.100 | 7,210      | 8,248      | 525       |

Table\_S2\_TP

|          |                                                   |         |    |          |          |           |            |            |     |       |       |            |            |           |
|----------|---------------------------------------------------|---------|----|----------|----------|-----------|------------|------------|-----|-------|-------|------------|------------|-----------|
| 05551995 | SOMONAUW CREEK AT SHERIDAN, IL                    | 7120007 | IL | 41.54361 | -88.6867 | 215.7     | 7/9/1979   | 12/10/1998 | 182 | 0.138 | 0.070 | 9,584      | 23,943     | 1,283     |
| 05552500 | FOX RIVER AT DAYTON, IL                           | 7120007 | IL | 41.38325 | -88.7909 | 6,843.4   | 8/30/1971  | 1/13/1998  | 224 | 0.322 | 0.270 | 530,684    | 505,763    | 25,976    |
| 05553500 | ILLINOIS RIVER AT OTTAWA, IL                      | 7130001 | IL | 41.34199 | -88.8467 | 28,357.9  | 3/8/1972   | 8/4/2004   | 148 | 0.705 | 0.576 | 5,959,924  | 3,420,271  | 351,291   |
| 05554490 | VERMILION RIVER AT MC DOWELL, IL                  | 7130002 | IL | 40.83059 | -88.5748 | 1,427.1   | 9/18/1978  | 12/11/1998 | 134 | 0.120 | 0.090 | 43,923     | 131,430    | 4,681     |
| 05555300 | VERMILION RIVER NEAR LEONORE, IL                  | 7130002 | IL | 41.20959 | -88.9373 | 3,240.1   | 1/23/1978  | 12/11/1998 | 137 | 0.288 | 0.210 | 202,902    | 284,336    | 18,657    |
| 05556200 | ILLINOIS RIVER AT HENNEPIN                        | 7130001 | IL | 41.25788 | -89.3488 | 33,143.2  | 3/12/1984  | 12/15/1998 | 131 | 0.362 | 0.335 | 3,600,962  | 3,803,678  | 100,969   |
| 05556500 | BIG BUREAU CREEK AT PRINCETON, IL                 | 7130001 | IL | 41.36494 | -89.4976 | 507.6     | 1/23/1978  | 12/14/1998 | 143 | 0.449 | 0.194 | 23,930     | 34,481     | 2,124     |
| 05558995 | ILLINOIS RIVER AT LACON, IL                       | 7130001 | IL | 41.02504 | -89.4173 | 35,394.9  | 3/12/1984  | 12/15/1998 | 129 | 0.352 | 0.340 | 3,754,633  | 3,839,947  | 106,843   |
| 05559900 | ILLINOIS RIVER AT WATER COMPANY AT PEORIA, IL     | 7130001 | IL | 40.72493 | -89.5473 | 36,001.0  | 11/17/1970 | 12/15/1998 | 215 | 0.372 | 0.340 | 3,632,357  | 3,857,314  | 187,095   |
| 05563800 | ILLINOIS RIVER AT PEKIN, IL                       | 7130003 | IL | 40.57309 | -89.6548 | 36,555.1  | 1/21/1980  | 12/14/1998 | 181 | 0.373 | 0.360 | 4,372,899  | 3,058,054  | 130,543   |
| 05567510 | MACKINAW RIVER BELOW CONGERVILLE, IL              | 7130004 | IL | 40.58672 | -89.2785 | 2,009.8   | 3/7/1984   | 12/15/1998 | 136 | 0.102 | 0.080 | 52,327     | 226,501    | 5,236     |
| 05568005 | MACKINAW RIVER BELOW GREEN VALLEY, IL             | 7130004 | IL | 40.44754 | -89.6912 | 2,828.3   | 8/1/1988   | 12/14/1998 | 95  | 0.163 | 0.100 | 183,911    | 308,427    | 20,800    |
| 05568800 | INDIAN CREEK NEAR WYOMING, IL                     | 7130005 | IL | 41.01846 | -89.8359 | 162.4     | 1/23/1978  | 12/17/1998 | 164 | 0.177 | 0.130 | 6,575      | 13,882     | 639       |
| 05568915 | SPOON RIVER NEAR DAHINDA, IL                      | 7130005 | IL | 40.90791 | -90.0868 | 1,976.4   | 2/9/1984   | 12/17/1998 | 134 | 0.192 | 0.128 | 107,499    | 178,080    | 10,209    |
| 05569500 | SPOON RIVER AT LONDON MILLS, IL                   | 7130005 | IL | 40.70676 | -90.2829 | 2,776.5   | 2/8/1984   | 12/16/1998 | 135 | 0.226 | 0.140 | 180,585    | 265,696    | 19,368    |
| 05570000 | SPOON RIVER AT SEVILLE, IL                        | 7130005 | IL | 40.48497 | -90.3422 | 4,236.7   | 6/17/1981  | 12/28/1998 | 141 | 0.276 | 0.150 | 369,019    | 387,141    | 41,931    |
| 05570520 | ILLINOIS RIVER AT POWER COMPANY AT HAVANA, IL     | 7130003 | IL | 40.28032 | -90.0815 | 47,397.0  | 4/24/1978  | 11/30/1998 | 141 | 0.349 | 0.340 | 5,117,590  | 3,895,850  | 132,481   |
| 05570910 | SANGAMON RIVER AT FISHER, IL                      | 7130006 | IL | 40.31119 | -88.3227 | 621.6     | 1/17/1979  | 11/23/1998 | 184 | 0.139 | 0.110 | 27,097     | 53,524     | 2,644     |
| 05572000 | SANGAMON RIVER AT MONTICELLO, IL                  | 7130006 | IL | 40.02573 | -88.5891 | 1,424.5   | 1/27/1972  | 8/16/2005  | 160 | 0.205 | 0.150 | 67,489     | 143,505    | 8,282     |
| 05572125 | SANGAMON R AT ALLERTON PARK NEAR MONTICELLO, IL   | 7130006 | IL | 40.00226 | -88.6353 | 1,489.4   | 10/19/1978 | 12/21/1998 | 174 | 0.203 | 0.170 | 70,759     | 146,027    | 5,445     |
| 05573504 | SANGAMON R. AT L DECATUR WATER INTAKE AT DECATUR  | 7130006 | IL | 39.82893 | -88.9597 | 2,403.6   | 11/4/1982  | 12/11/1998 | 137 | 0.143 | 0.119 | 83,308     | 219,089    | 6,328     |
| 05573540 | SANGAMON RIVER AT ROUTE 48 AT DECATUR, IL         | 7130006 | IL | 39.83094 | -88.9763 | 2,429.4   | 5/26/1983  | 12/11/1998 | 132 | 0.215 | 0.130 | 86,658     | 221,702    | 7,735     |
| 05573650 | SANGAMON RIVER NEAR NIANTIC, IL                   | 7130006 | IL | 39.79723 | -89.1054 | 2,737.8   | 5/26/1983  | 12/11/1998 | 137 | 1.540 | 0.625 | 270,900    | 280,726    | 18,658    |
| 05573800 | SANGAMON RIVER AT ROBY, IL                        | 7130006 | IL | 39.74227 | -89.3992 | 3,273.8   | 6/6/1983   | 11/24/1998 | 129 | 1.132 | 0.460 | 286,180    | 319,687    | 21,421    |
| 05575500 | SOUTH FORK SANGAMON RIVER AT KINCAID, IL          | 7130007 | IL | 39.57884 | -89.3925 | 1,455.6   | 5/3/1978   | 11/24/1998 | 184 | 0.349 | 0.250 | 92,296     | 148,050    | 7,216     |
| 05576022 | SOUTH FORK SANGAMON RIVER BELOW ROCHESTER, IL     | 7130007 | IL | 39.75411 | -89.5662 | 2,253.3   | 3/17/1981  | 12/21/1998 | 142 | 0.279 | 0.220 | 105,469    | 196,225    | 7,945     |
| 05576500 | SANGAMON RIVER AT RIVERTON, IL                    | 7130008 | IL | 39.84754 | -89.55   | 6,780.6   | 1/9/1986   | 12/21/1998 | 116 | 0.871 | 0.440 | 521,784    | 603,864    | 32,882    |
| 05577505 | SPRING CR AT BURNS LANE BRIDGE AT SPRINGFIELD, IL | 7130008 | IL | 39.82055 | -89.6877 | 282.3     | 4/19/1979  | 12/21/1998 | 140 | 0.298 | 0.190 | 10,284     | 15,855     | 990       |
| 05578000 | SANGAMON RIVER AT PETERSBURG, IL                  | 7130008 | IL | 40.01102 | -89.844  | 7,933.2   | 5/1/1978   | 11/30/1998 | 145 | 0.723 | 0.450 | 798,619    | 701,245    | 37,078    |
| 05578500 | SALT CREEK NEAR ROWELL, IL                        | 7130009 | IL | 40.11457 | -89.0505 | 867.7     | 7/20/1979  | 12/29/1998 | 151 | 0.218 | 0.140 | 25,404     | 61,414     | 1,565     |
| 05579500 | LAKE FORK NEAR CORNLAND, IL                       | 7130009 | IL | 39.95123 | -89.3841 | 554.3     | 5/4/1978   | 12/29/1998 | 152 | 0.158 | 0.090 | 30,703     | 41,847     | 3,295     |
| 05580000 | KICKAPOO CREEK AT WAYNESVILLE, IL                 | 7130009 | IL | 40.25517 | -89.1283 | 587.9     | 5/11/1981  | 12/29/1998 | 145 | 0.134 | 0.070 | 28,979     | 50,008     | 4,393     |
| 05580500 | KICKAPOO CREEK NEAR LINCOLN, IL                   | 7130009 | IL | 40.1864  | -89.3668 | 792.5     | 3/27/1979  | 12/7/1998  | 150 | 0.146 | 0.080 | 41,857     | 73,206     | 5,936     |
| 05582000 | SALT CREEK NEAR GREENVIEW, IL                     | 7130009 | IL | 40.13304 | -89.7367 | 4,672.4   | 5/1/1978   | 12/7/1998  | 154 | 0.262 | 0.210 | 302,202    | 408,778    | 19,417    |
| 05583000 | SANGAMON RIVER NEAR OAKFORD, IL                   | 7130008 | IL | 40.12302 | -89.9852 | 13,190.9  | 12/20/1977 | 11/30/1998 | 225 | 0.419 | 0.348 | 1,084,438  | 1,145,867  | 46,533    |
| 05584500 | LA MOINE RIVER AT COLMAR, IL                      | 7130010 | IL | 40.33088 | -90.896  | 1,696.5   | 2/17/1975  | 12/16/1998 | 358 | 0.273 | 0.170 | 119,915    | 139,324    | 11,552    |
| 05585000 | LA MOINE RIVER AT RIPLEY, IL                      | 7130010 | IL | 40.02384 | -90.6308 | 3,348.9   | 7/16/1975  | 12/14/1998 | 285 | 0.286 | 0.180 | 336,372    | 267,533    | 24,910    |
| 05586100 | ILLINOIS RIVER AT VALLEY CITY, IL                 | 7130011 | IL | 39.70341 | -90.6462 | 69,267.0  | 12/12/1974 | 8/18/2005  | 377 | 0.391 | 0.360 | 7,436,764  | 5,459,811  | 284,665   |
| 05587000 | MACOUPIN CREEK NEAR KANE, IL                      | 7130012 | IL | 39.23422 | -90.3946 | 2,248.1   | 6/28/1978  | 11/22/1998 | 139 | 0.325 | 0.210 | 292,897    | 257,172    | 27,870    |
| 05587455 | MISSISSIPPI RIVER BELOW GRAFTON, IL               | 7110009 | IL | 38.95033 | -90.3715 | 443,667.0 | 5/4/1989   | 9/12/2005  | 183 | 0.242 | 0.203 | 31,359,903 | 29,524,914 | 1,762,241 |
| 05587900 | CAHOKIA CREEK AT EDWARDSVILLE, IL                 | 7140101 | IL | 38.82447 | -89.975  | 549.1     | 2/14/1984  | 12/15/1998 | 133 | 0.381 | 0.200 | 78,741     | 52,120     | 11,678    |
| 05591200 | KASKASKIA RIVER AT COOKS MILLS, IL                | 7140201 | IL | 39.58315 | -88.4132 | 1,225.1   | 12/1/1977  | 12/3/1998  | 194 | 0.270 | 0.200 | 74,259     | 85,212     | 6,444     |
| 05591300 | KASKASKIA RIVER AT ALLENVILLE, IL                 | 7140201 | IL | 39.57281 | -88.5322 | 1,310.5   | 1/16/1980  | 12/3/1998  | 175 | 0.231 | 0.180 | 75,815     | 89,178     | 5,581     |
| 05591400 | JONATHAN CREEK NEAR SULLIVAN, IL                  | 7140201 | IL | 39.60111 | -88.5461 | 141.7     | 3/3/1980   | 12/7/1998  | 154 | 0.152 | 0.095 | 3,887      | 5,490      | 479       |
| 05591700 | WEST OKAW RIVER NEAR LOVINGTON, IL                | 7140201 | IL | 39.73133 | -88.6623 | 290.1     | 4/7/1980   | 12/7/1998  | 153 | 0.126 | 0.070 | 10,012     | 22,362     | 1,144     |
| 05592000 | KASKASKIA RIVER AT SHELBYVILLE, IL                | 7140201 | IL | 39.39884 | -88.7881 | 2,729.9   | 10/31/1977 | 12/15/1998 | 200 | 0.057 | 0.030 | 49,635     | 134,203    | 4,250     |
| 05592100 | KASKASKIA RIVER NEAR COWDEN, IL                   | 7140201 | IL | 39.22962 | -88.8449 | 3,444.7   | 10/17/1977 | 12/21/1998 | 200 | 0.135 | 0.090 | 127,641    | 215,456    | 9,554     |
| 05592195 | BECK CREEK AT HERRICK, IL                         | 7140201 | IL | 39.21639 | -89.0206 | 251.2     | 10/22/1979 | 12/21/1998 | 173 | 0.229 | 0.192 | 19,111     | 25,803     | 1,773     |
| 05592500 | KASKASKIA RIVER AT VANDALIA, IL                   | 7140202 | IL | 38.95644 | -89.0877 | 5,024.6   | 10/3/1977  | 12/22/1998 | 194 | 0.202 | 0.160 | 293,963    | 417,422    | 18,397    |
| 05592600 | HICKORY CREEK NEAR BLUFF CITY, IL                 | 7140202 | IL | 38.92525 | -89.0393 | 201.5     | 1/19/1989  | 12/22/1998 | 74  | 0.188 | 0.130 | 20,157     | 20,553     | 5,603     |
| 05592800 | HURRICANE CREEK NEAR MULBERRY GROVE, IL           | 7140202 | IL | 38.91851 | -89.2428 | 393.7     | 5/3/1978   | 12/22/1998 | 191 | 0.221 | 0.170 | 53,942     | 50,585     | 7,099     |
| 05592900 | EAST FORK KASKASKIA RIVER NEAR SANDOVA, IL        | 7140202 | IL | 38.69236 | -89.0999 | 292.7     | 12/12/1979 | 12/17/1998 | 168 | 0.245 | 0.200 | 36,749     | 31,258     | 4,185     |
| 05592930 | NORTH FORK KASKASKIA RIVER NEAR PATOKA, IL        | 7140202 | IL | 38.77361 | -89.0861 | 101.3     | 1/19/1989  | 12/17/1998 | 75  | 0.355 | 0.290 | 13,616     | 9,302      | 3,139     |
| 05593010 | KASKASKIA RIVER BELOW CARLYLE, IL                 | 7140202 | IL | 38.57449 | -89.3693 | 7,081.1   | 10/28/1977 | 12/15/1998 | 197 | 0.171 | 0.150 | 300,038    | 540,964    | 14,124    |
| 05593505 | CROOKED CREEK NEAR ODIN, IL                       | 7140202 | IL | 38.56389 | -89.0503 | 231.0     | 4/20/1982  | 12/17/1998 | 136 | 0.510 | 0.305 | 28,790     | 20,526     | 3,800     |
| 05594000 | SHOAL CREEK NEAR BREESE, IL                       | 7140203 | IL | 38.60959 | -89.4945 | 1,903.7   | 4/28/1982  | 11/17/1998 | 142 | 0.275 | 0.220 | 257,632    | 220,870    | 22,558    |
| 05594100 | KASKASKIA RIVER NEAR VENEDY STATION, IL           | 7140204 | IL | 38.44995 | -89.6298 | 11,377.9  | 11/12/1974 | 11/18/1998 | 236 | 0.267 | 0.220 | 939,056    | 1,216,582  | 55,281    |
| 05594450 | SILVER CREEK NEAR TROY, IL                        | 7140204 | IL | 38.7152  | -89.8304 | 398.9     | 4/21/1982  | 12/15/1998 | 143 | 1.031 | 0.660 | 92,938     | 50,072     | 9,506     |
| 05594800 | SILVER CREEK NEAR FREEBURG, IL                    | 7140204 | IL | 38.39653 | -89.873  | 1,201.8   | 4/27/1982  | 12/9/1998  | 145 | 0.664 | 0.540 | 241,572    | 143,850    | 19,081    |
| 05595200 | RICHLAND CREEK NEAR HECKER, IL                    | 7140204 | IL | 38.32375 | -89.9711 | 334.1     | 8/28/1978  | 12/9/1998  | 147 | 1.209 | 0.890 | 83,719     | 54,062     | 9,083     |

Table\_S2\_TP

|          |                                                   |         |    |          |          |           |            |            |     |       |       |           |           |         |
|----------|---------------------------------------------------|---------|----|----------|----------|-----------|------------|------------|-----|-------|-------|-----------|-----------|---------|
| 05595700 | BIG MUDDY RIVER NEAR MT. VERNON, IL               | 7140106 | IL | 38.30935 | -88.9887 | 186.2     | 10/2/1985  | 12/2/1998  | 118 | 0.196 | 0.140 | 34,573    | 12,937    | 6,611   |
| 05595730 | RAYSE CREEK NEAR WALTONVILLE, IL                  | 7140106 | IL | 38.25381 | -89.0399 | 227.9     | 12/20/1979 | 12/2/1998  | 161 | 0.233 | 0.140 | 38,207    | 20,006    | 5,817   |
| 05595830 | CASEY FORK AT ROUTE 37 NEAR MT. VERNON, IL        | 7140106 | IL | 38.26947 | -88.8989 | 227.1     | 12/18/1979 | 12/2/1998  | 162 | 0.516 | 0.230 | 25,342    | 13,855    | 4,071   |
| 05597000 | BIG MUDDY RIVER AT PLUMFIELD, IL                  | 7140106 | IL | 37.90148 | -89.0143 | 2,056.5   | 11/17/1981 | 11/24/1998 | 135 | 0.173 | 0.160 | 112,025   | 131,200   | 8,041   |
| 05597500 | CRAB ORCHARD CREEK NEAR MARION, IL                | 7140106 | IL | 37.73092 | -88.8895 | 82.1      | 10/20/1977 | 11/16/1998 | 154 | 0.107 | 0.065 | 7,529     | 6,557     | 1,206   |
| 05599500 | BIG MUDDY RIVER AT MURPHYSBORO, IL                | 7140106 | IL | 37.74924 | -89.3471 | 5,617.7   | 11/11/1974 | 12/1/1998  | 235 | 0.215 | 0.200 | 412,380   | 437,640   | 36,454  |
| 07014500 | Meramec River near Sullivan, MO                   | 7140102 | MO | 38.15847 | -91.1086 | 3,820.3   | 10/22/1970 | 9/1/2005   | 357 | 0.051 | 0.030 | 38,488    | 147,671   | 7,017   |
| 07016400 | Bourbeuse River above Union, MO                   | 7140103 | MO | 38.432   | -91.0199 | 2,092.7   | 10/22/1970 | 9/7/2005   | 197 | 0.062 | 0.050 | 83,874    | 105,561   | 13,589  |
| 07018100 | Big River near Richwoods, MO                      | 7140104 | MO | 38.15988 | -90.7055 | 1,903.7   | 12/20/1983 | 9/1/2005   | 118 | 0.041 | 0.030 | 54,406    | 76,839    | 11,960  |
| 07019280 | Meramec River at Paulina Hills, MO                | 7140102 | MO | 38.46283 | -90.4148 | 10,152.8  | 10/22/1970 | 9/8/2005   | 323 | 0.108 | 0.097 | 312,814   | 455,338   | 19,766  |
| 090162   | SAGINAW R AT MIDLAND ST BR; BANGOR TWP, SEC 21    | 4080206 | MI | 43.60139 | -83.8919 | 15,845.6  | 1/29/1974  | 6/18/1996  | 113 | 0.165 | 0.147 | 445,728   | 515,695   | 24,204  |
| 093051   | CHIPPEWA R @ NSP HOLCOMBE DM TAILRACE             | 7050005 | WI | 45.22441 | -91.1281 | 11,923.6  | 2/10/1977  | 6/6/2001   | 149 | 0.045 | 0.040 | 189,800   | 180,906   | 11,535  |
| 10070001 | Beaver Creek near Cedar Falls                     | 7080205 | IA | 42.5732  | -92.5065 | 1,009.2   | 10/26/1998 | 9/4/2007   | 90  | 0.191 | 0.120 | 113,206   | 110,634   | 15,457  |
| 10070002 | Wolf Creek at La Porte City                       | 7080205 | IA | 42.3158  | -92.1936 | 847.6     | 6/5/2001   | 9/4/2007   | 75  | 0.244 | 0.130 | 108,120   | 84,288    | 20,699  |
| 10070004 | Black Hawk Creek at Waterloo                      | 7080205 | IA | 42.4695  | -92.4134 | 848.1     | 10/2/2001  | 9/4/2007   | 76  | 0.198 | 0.140 | 74,727    | 73,345    | 11,927  |
| 10090001 | Cedar River near Janesville                       | 7080201 | IA | 42.6496  | -92.4664 | 4,287.4   | 10/26/1998 | 9/10/2007  | 88  | 0.190 | 0.170 | 305,893   | 286,650   | 23,862  |
| 10120001 | Shell Rock River at Shell Rock                    | 7080202 | IA | 42.7116  | -92.5812 | 4,427.4   | 11/9/1999  | 9/10/2007  | 105 | 0.232 | 0.180 | 383,282   | 271,544   | 26,734  |
| 10160001 | Cedar River at Cedar Bluff                        | 7080206 | IA | 41.78801 | -91.3124 | 18,117.6  | 12/6/1999  | 7/5/2006   | 79  | 0.332 | 0.320 | 1,598,518 | 1,283,470 | 139,486 |
| 10170002 | Winnebago River Upstream of Mason City            | 7080203 | IA | 43.1929  | -93.2103 | 1,162.4   | 11/11/1999 | 9/10/2007  | 85  | 0.214 | 0.150 | 119,852   | 63,265    | 14,619  |
| 10170003 | Winnebago River Downstream of Mason City          | 7080203 | IA | 43.1257  | -93.1231 | 1,595.9   | 11/11/1999 | 9/10/2007  | 86  | 0.302 | 0.295 | 127,998   | 99,110    | 11,479  |
| 10220002 | Volga River near Elkport                          | 7060004 | IA | 42.7497  | -91.2766 | 1,042.7   | 2/23/2000  | 9/12/2007  | 85  | 0.513 | 0.100 | 242,941   | 104,064   | 81,937  |
| 10250001 | South Raccoon River near Redfield                 | 7100007 | IA | 41.5798  | -94.1827 | 2,512.2   | 3/1/2000   | 9/6/2007   | 84  | 0.305 | 0.145 | 403,219   | 223,393   | 89,119  |
| 103094   | BLACK RIVER                                       | 7040007 | WI | 44.57076 | -90.5952 | 1,717.2   | 3/30/1978  | 9/3/2003   | 154 | 0.170 | 0.159 | 87,829    | 127,121   | 7,783   |
| 10340001 | Cedar River near Charles City                     | 7080201 | IA | 43.00726 | -92.6029 | 2,833.8   | 1/12/1971  | 9/10/2007  | 305 | 0.247 | 0.200 | 177,025   | 196,149   | 11,383  |
| 10370001 | North Raccoon River near Jefferson                | 7100006 | IA | 42.0119  | -94.4286 | 4,091.6   | 1/11/2000  | 11/13/2006 | 87  | 0.332 | 0.250 | 439,122   | 404,441   | 68,635  |
| 10400001 | Boone River near Stratford                        | 7100005 | IA | 42.3411  | -93.892  | 2,286.1   | 10/18/1999 | 9/10/2007  | 93  | 0.249 | 0.190 | 182,975   | 246,118   | 27,131  |
| 10420001 | Iowa River near Gifford                           | 7080207 | IA | 42.3102  | -93.0755 | 2,039.0   | 10/7/1999  | 9/12/2007  | 87  | 0.205 | 0.150 | 157,325   | 228,315   | 21,236  |
| 10440001 | Cedar Creek near Oakland Mills                    | 7080107 | IA | 40.9254  | -91.6735 | 1,385.9   | 10/12/1998 | 9/4/2007   | 98  | 0.303 | 0.200 | 128,223   | 161,444   | 17,000  |
| 10460001 | West Fork Des Moines River near Humboldt          | 7100002 | IA | 42.6744  | -94.2069 | 5,926.7   | 4/30/1981  | 9/11/2007  | 107 | 0.221 | 0.200 | 323,837   | 472,603   | 24,371  |
| 10490001 | North Fork Maquoketa River near Hurstville        | 7060006 | IA | 42.09025 | -90.6723 | 1,527.3   | 10/13/1998 | 9/5/2007   | 100 | 0.360 | 0.205 | 510,462   | 188,551   | 203,391 |
| 10490002 | Maquoketa River near Maquoketa                    | 7060006 | IA | 42.0757  | -90.6823 | 2,470.8   | 3/1/2000   | 9/5/2007   | 83  | 0.200 | 0.160 | 218,950   | 203,920   | 27,287  |
| 10500001 | Indian Creek near Colfax                          | 7080105 | IA | 41.74621 | -93.2264 | 1,038.0   | 1/10/2000  | 9/12/2007  | 90  | 0.292 | 0.185 | 102,848   | 77,799    | 16,681  |
| 10520002 | Iowa River Upstream of Iowa City                  | 7080209 | IA | 41.6937  | -91.5466 | 8,122.5   | 11/30/1999 | 9/5/2007   | 82  | 0.191 | 0.180 | 407,626   | 781,465   | 31,305  |
| 10520003 | Iowa River Downstream of Iowa City                | 7080209 | IA | 41.5547  | -91.5186 | 8,565.0   | 11/30/1999 | 9/5/2007   | 86  | 0.249 | 0.220 | 526,549   | 821,717   | 35,781  |
| 10540001 | North Skunk River                                 | 7080106 | IA | 41.28387 | -92.2574 | 1,649.6   | 10/12/1998 | 9/11/2007  | 90  | 0.339 | 0.200 | 232,491   | 161,631   | 37,337  |
| 10550001 | East Fork of The Des Moines River near St. Joseph | 7100003 | IA | 42.95138 | -94.2335 | 2,432.9   | 10/12/1998 | 9/11/2007  | 99  | 0.243 | 0.210 | 137,122   | 218,230   | 11,730  |
| 10570002 | Cedar River Upstream of Cedar Rapids              | 7080205 | IA | 42.0692  | -91.7847 | 16,245.2  | 5/9/2000   | 9/5/2007   | 80  | 0.224 | 0.200 | 1,237,685 | 1,155,266 | 124,788 |
| 10630001 | Whitebreast Creek near Knoxville                  | 7100008 | IA | 41.3026  | -93.1713 | 917.6     | 3/6/2000   | 9/5/2007   | 84  | 0.272 | 0.125 | 118,361   | 85,241    | 30,465  |
| 10630002 | Cedar Creek near Bussey                           | 7100009 | IA | 41.2191  | -92.9077 | 965.0     | 4/3/2000   | 9/5/2007   | 95  | 0.517 | 0.110 | 315,183   | 108,922   | 79,000  |
| 10640002 | Iowa River Downstream of Marshalltown             | 7080208 | IA | 42.0508  | -92.8464 | 4,254.3   | 1/27/1976  | 9/12/2007  | 118 | 0.389 | 0.315 | 361,020   | 534,620   | 28,419  |
| 10640003 | Iowa River Upstream of Marshalltown               | 7080208 | IA | 42.0917  | -93.0002 | 3,817.6   | 4/17/2000  | 9/12/2007  | 77  | 0.182 | 0.130 | 299,271   | 487,287   | 37,820  |
| 10700001 | Cedar River near Conesville                       | 7080206 | IA | 41.4093  | -91.29   | 19,949.4  | 10/14/1999 | 9/4/2007   | 93  | 0.352 | 0.300 | 1,656,927 | 1,428,639 | 144,434 |
| 10770001 | Beaver Creek near Grimes                          | 7100004 | IA | 41.6883  | -93.7353 | 969.3     | 10/11/1999 | 9/6/2007   | 92  | 0.332 | 0.200 | 80,548    | 52,258    | 13,284  |
| 10770003 | Des Moines River Downstream of Des Moines         | 7100008 | IA | 41.4877  | -93.3384 | 29,882.3  | 11/15/1999 | 9/6/2007   | 85  | 0.514 | 0.380 | 3,301,192 | 2,401,950 | 400,796 |
| 10850003 | South Skunk River Upstream of Ames                | 7080105 | IA | 42.06631 | -93.6207 | 822.3     | 10/7/1999  | 9/12/2007  | 80  | 0.203 | 0.150 | 79,659    | 115,959   | 14,114  |
| 10900002 | Des Moines River Downstream of Ottumwa            | 7100009 | IA | 40.95677 | -92.34   | 34,441.8  | 11/2/1999  | 9/11/2007  | 84  | 0.352 | 0.320 | 2,110,196 | 2,732,401 | 188,404 |
| 10900003 | Des Moines River Upstream of Ottumwa              | 7100009 | IA | 41.0874  | -92.5258 | 33,982.4  | 11/2/1999  | 9/11/2007  | 86  | 0.353 | 0.295 | 2,191,253 | 2,691,456 | 195,338 |
| 10910001 | Middle River near Indianola                       | 7100008 | IA | 41.4247  | -93.5871 | 1,269.3   | 10/15/1998 | 9/6/2007   | 88  | 0.452 | 0.200 | 311,965   | 126,838   | 60,926  |
| 10940002 | Des Moines River Upstream of Fort Dodge           | 7100004 | IA | 42.5436  | -94.2163 | 9,531.0   | 6/12/2000  | 9/10/2007  | 82  | 0.189 | 0.170 | 657,744   | 783,200   | 69,995  |
| 123016   | Mississippi R. at LD 9                            | 7060001 | WI | 43.21167 | -91.1025 | 166,212.4 | 2/3/1977   | 9/4/2007   | 314 | 0.155 | 0.150 | 5,650,573 | 8,111,003 | 163,946 |
| 123017   | Kickapoo R. at Stueben                            | 7070006 | WI | 43.18214 | -90.8506 | 1,773.6   | 2/3/1977   | 9/20/2007  | 281 | 0.158 | 0.120 | 89,750    | 95,906    | 5,826   |
| 130001   | Maquoketa River                                   | 7060006 | IA | 42.18667 | -90.3106 | 4,818.0   | 5/5/1993   | 11/8/2005  | 281 | 0.312 | 0.188 | 501,307   | 465,400   | 58,313  |
| 130003   | APPLE RIVER NEAR HANOVER, IL                      | 7060005 | IL | 42.18718 | -90.236  | 657.4     | 5/3/1993   | 11/8/2005  | 238 | 0.174 | 0.135 | 48,486    | 55,835    | 7,946   |
| 130202   | BATTLE CREEK R @ 9 MILE RD; PENNFIELD TWP SEC 21  | 4050003 | MI | 42.36417 | -85.1222 | 536.5     | 10/8/1979  | 3/1/1994   | 170 | 0.073 | 0.067 | 12,053    | 19,499    | 348     |
| 133416   | SUGAR RIVER AT STH 69 DWNSTM BRIDGE               | 7090004 | WI | 42.94904 | -89.5445 | 212.4     | 5/27/1997  | 12/5/2000  | 49  | 0.083 | 0.080 | 10,469    | 16,257    | 1,384   |
| 133417   | SUGAR RIVER AT VALLEY RD.                         | 7090004 | WI | 42.9725  | -89.5667 | 120.7     | 5/27/1997  | 12/5/2000  | 50  | 0.073 | 0.068 | 3,159     | 10,305    | 245     |
| 140001   | Wapsipicon River                                  | 7080103 | IA | 41.7273  | -90.3646 | 6,524.4   | 5/5/1993   | 11/8/2005  | 282 | 0.256 | 0.189 | 469,652   | 397,124   | 36,373  |
| 160376   | E BR DUPAGE R .5 MI S NAPERVILLE T37N R10E NE7    | 7120004 | IL | 41.71111 | -88.1278 | 194.2     | 10/22/1970 | 12/3/1997  | 70  | 2.624 | 2.400 | 140,998   | 64,919    | 7,378   |
| 160383   | E BR DUPAGE R MAPLE AV LISLE T38N R10E SE10       | 7120004 | IL | 41.78571 | -88.0792 | 136.9     | 10/22/1970 | 9/17/1997  | 66  | 3.312 | 2.705 | 108,141   | 47,918    | 4,834   |
| 163001   | ST. LOUIS RIVER AT OLIVER                         | 4010201 | WI | 46.65669 | -92.2004 | 9,114.0   | 7/11/1972  | 11/20/1996 | 271 | 0.053 | 0.046 | 116,928   | 119,226   | 4,857   |

Table\_S2\_TP

|                 |                                                   |         |    |          |          |          |            |            |     |       |       |           |           |         |
|-----------------|---------------------------------------------------|---------|----|----------|----------|----------|------------|------------|-----|-------|-------|-----------|-----------|---------|
| 163002          | BOIS BRULE RIVER                                  | 4010301 | WI | 46.67936 | -91.5949 | 466.6    | 7/31/1973  | 7/24/2007  | 175 | 0.039 | 0.030 | 7,765     | 5,524     | 781     |
| 171408          | MISSISSINAWA RIVER AT PERU MILE POINT 0.8         | 5120103 | IN | 40.75389 | -86.0231 | 2,107.3  | 2/9/1971   | 12/6/1995  | 266 | 0.139 | 0.090 | 140,947   | 159,085   | 15,567  |
| 171420          | ST. MARY'S RIVER NEAR FT WAYNE AT MI PT 10.83     | 4100004 | IN | 40.988   | -85.099  | 1,800.1  | 2/27/1973  | 12/12/1995 | 240 | 0.370 | 0.330 | 239,529   | 258,427   | 16,025  |
| 171433          | WABASH R AT US 27 BRIDGE N OF GENEVA, MI PT451.9  | 5120101 | IN | 40.61667 | -84.9542 | 1,211.3  | 6/5/1979   | 12/14/1995 | 173 | 0.396 | 0.340 | 177,198   | 203,183   | 13,842  |
| 173051          | RED CEDAR R @ CTH Y BRIDGE                        | 7050007 | WI | 44.71927 | -91.9034 | 4,852.4  | 2/10/1977  | 8/5/1999   | 27  | 0.138 | 0.120 | 192,414   | 140,259   | 10,703  |
| 173208          | Red Cedar R. at Menomonee                         | 7050007 | WI | 44.88336 | -91.9319 | 4,627.8  | 8/4/1987   | 9/5/2007   | 175 | 0.119 | 0.100 | 170,311   | 129,496   | 6,336   |
| 173993          | WABASH RIVER AT VINCENNES US 50 AT MI PT 129.8    | 5120111 | IN | 38.70722 | -87.5192 | 35,578.4 | 2/9/1971   | 11/29/1995 | 245 | 0.242 | 0.180 | 3,229,014 | 2,522,099 | 171,066 |
| 174000          | WABASH R NR HUNTINGTON IND AT MILE POINT 409.05   | 5120101 | IN | 40.85479 | -85.4983 | 1,993.2  | 1/12/1971  | 12/12/1995 | 251 | 0.242 | 0.190 | 188,782   | 251,405   | 11,526  |
| 174001          | WHITE RIVER NEAR HAZELTON.                        | 5120202 | IN | 38.49083 | -87.5653 | 29,382.0 | 2/16/1971  | 11/29/1995 | 29  | 0.269 | 0.190 | 3,278,249 | 2,305,980 | 755,904 |
| 174035          | WHITE R AT PERKINSVILLE MILE POINT 278.610        | 5120201 | IN | 40.14167 | -85.88   | 1,889.5  | 3/11/1971  | 12/14/1995 | 269 | 0.601 | 0.380 | 375,229   | 137,322   | 35,454  |
| 174303          | BLUE R ON INTERSTATE 70 AT MILE POINT 63.76       | 5120204 | IN | 39.85401 | -85.4773 | 242.3    | 3/24/1971  | 12/13/1995 | 104 | 0.369 | 0.180 | 20,290    | 20,632    | 3,929   |
| 174317          | WHITE RIVER AT EDWARDSPOINT, MILE POINT 80.98     | 5120202 | IN | 38.80696 | -87.2459 | 12,931.6 | 2/8/1971   | 11/29/1995 | 267 | 0.454 | 0.290 | 1,839,890 | 1,143,928 | 111,224 |
| 174319          | WHITE RIVER AT SPENCER MILE POINT 162.22          | 5120202 | IN | 39.28778 | -86.7458 | 7,751.8  | 2/16/1971  | 11/29/1995 | 243 | 0.596 | 0.420 | 1,264,214 | 827,235   | 76,538  |
| 174350          | TIPPECANOE R-ROCHESTER US 31 N OF TOWN MI PT 107  | 5120106 | IN | 41.10603 | -86.2204 | 1,485.7  | 1/13/1986  | 12/21/1995 | 106 | 0.230 | 0.120 | 102,707   | 68,534    | 12,709  |
| 174554          | WHITE R-W FORK-WAVERLY S.R. 144 BR MI PT 210      | 5120201 | IN | 39.55972 | -86.2744 | 5,275.6  | 1/21/1986  | 11/30/1995 | 113 | 0.771 | 0.440 | 863,079   | 536,885   | 79,041  |
| 1BBFW0001       | BEECH FORK LAKE                                   | 5090102 | WV | 38.29936 | -82.3967 | 146.3    | 8/17/1973  | 8/2/1995   | 46  | 0.031 | 0.020 |           |           |         |
| 1DEWV0001       | JOHNS CR OF LEVISA FORK KY                        | 5070203 | KY | 37.73908 | -82.7313 | 4,733.8  | 5/28/1974  | 7/30/1996  | 56  | 0.053 | 0.026 |           |           |         |
| 1DILLW0003      | LICKING CK AT TOBOSO GAGING STA                   | 5040006 | OH | 40.05694 | -82.22   | 1,743.9  | 8/29/1973  | 8/27/1996  | 51  | 0.128 | 0.060 |           |           |         |
| 1ELTW0031       | East Fork Twelvlepole Ck                          | 5090102 | WV | 38.05222 | -82.3081 | 127.9    | 6/15/1976  | 11/21/1997 | 74  | 0.027 | 0.010 | 1,619     | 1,685     | 789     |
| 1ELTW0032       | Kiah Creek                                        | 5090102 | WV | 38.06098 | -82.266  | 75.2     | 5/16/1977  | 11/21/1997 | 72  | 0.028 | 0.010 |           |           |         |
| 1FRLW0001       | LEVISA FORK KY                                    | 5070202 | KY | 37.42494 | -82.4121 | 1,019.3  | 6/25/1974  | 3/29/1994  | 82  | 0.036 | 0.015 | 20,900    | 16,517    | 9,876   |
| 1JWFW0001       | POUND RIVER VA                                    | 5070202 | VA | 37.23734 | -82.3433 | 574.7    | 6/26/1974  | 12/12/1995 | 75  | 0.018 | 0.010 |           |           |         |
| 1JWFW0002       | POUND RIVER VA                                    | 5070202 | VA | 37.16594 | -82.5233 | 215.4    | 6/26/1974  | 12/13/1995 | 73  | 0.106 | 0.020 |           |           |         |
| 1JWFW0003       | CRANES NEST R OF POUND RIVER VA                   | 5070202 | VA | 37.12397 | -82.4385 | 179.7    | 6/25/1974  | 12/12/1995 | 74  | 0.030 | 0.010 |           |           |         |
| 1PCSW0002       | Paint Creek, Main Inflow to Lake                  | 5060003 | OH | 39.32166 | -83.3866 | 706.7    | 7/26/1973  | 12/16/1996 | 61  | 0.415 | 0.230 | 52,764    | 45,482    | 9,664   |
| 1PESW0003       | STILLWATER CREEK ABOVE POOL                       | 5040001 | OH | 40.10192 | -81.1461 | 130.0    | 6/14/1983  | 10/14/1996 | 44  | 0.054 | 0.031 |           |           |         |
| 1PESW0008       | STILLWATER CREEK                                  | 5040001 | OH | 40.10259 | -81.1311 | 130.0    | 5/14/1987  | 11/6/1997  | 45  | 0.044 | 0.020 | 3,031     | 5,889     | 747     |
| 1RDBW0012       | Guyandot River                                    | 5070101 | WV | 37.61083 | -81.7342 | 1,291.5  | 1/29/1980  | 12/29/1997 | 53  | 0.032 | 0.020 |           |           |         |
| 1RDBW0015       | Clear Fork of Guyandot River                      | 5070101 | WV | 37.60917 | -81.7242 | 333.5    | 1/29/1980  | 12/29/1997 | 83  | 0.021 | 0.010 |           |           |         |
| 1SUMW0004       | MUDDLETY CREEK OF GAULEY RIVER                    | 5050005 | WV | 38.32675 | -80.8326 | 128.0    | 10/11/1979 | 5/27/1998  | 31  | 0.018 | 0.010 |           |           |         |
| 1SUTW0008       | RIGHT FK HOLLY RIVER WV                           | 5050007 | WV | 38.63576 | -80.4663 | 142.2    | 6/2/1976   | 5/27/1998  | 61  | 0.022 | 0.010 |           |           |         |
| 230028          | GRAND RIVER AT WEBSTER RD BR; DELTA TWP SEC 3     | 4050004 | MI | 42.76111 | -84.6496 | 3,251.8  | 4/3/1973   | 3/30/1994  | 337 | 0.197 | 0.156 | 153,602   | 148,604   | 5,192   |
| 233001          | Sugar R. at Broadhead                             | 7090004 | WI | 42.55023 | -89.3663 | 1,551.8  | 12/8/1970  | 9/18/2007  | 148 | 0.188 | 0.174 | 75,167    | 99,054    | 4,586   |
| 243020          | Fox R. at Berlin                                  | 4030201 | WI | 43.96667 | -88.9502 | 3,426.7  | 1/20/1977  | 7/10/2007  | 204 | 0.085 | 0.072 | 83,056    | 70,829    | 4,921   |
| 250098          | FLINT R AT CARPENTER RD BR; CITY OF FLINT         | 4080204 | MI | 43.07639 | -83.6542 | 1,591.4  | 9/18/1973  | 9/23/1996  | 233 | 0.066 | 0.060 | 28,892    | 41,584    | 1,245   |
| 260001          | Cuivre River                                      | 7110008 | MO | 38.92417 | -90.7489 | 3,177.5  | 5/3/1993   | 11/8/2005  | 201 | 0.160 | 0.116 | 487,025   | 421,745   | 83,672  |
| 263001          | MONTREAL RIVER NEAR SAXON, WI                     | 4010302 | WI | 46.55658 | -90.4141 | 689.3    | 10/21/1970 | 3/19/1998  | 50  | 0.062 | 0.050 | 11,076    | 15,072    | 629     |
| 273038          | BLACK RIVER AT BYPASS CHANNEL @ K                 | 7040007 | WI | 44.38942 | -90.7601 | 3,299.2  | 1/13/1994  | 6/5/2001   | 77  | 0.112 | 0.100 | 136,285   | 169,956   | 17,418  |
| 303066          | Fox (IL) R. near New Munster                      | 7120006 | WI | 42.61085 | -88.2254 | 2,040.9  | 3/13/1997  | 7/30/2007  | 42  | 0.116 | 0.106 | 59,935    | 139,471   | 4,316   |
| 313038          | KEWAUNEE RIVER NEAR KEWAUNEE, WI                  | 4030102 | WI | 44.45745 | -87.5557 | 343.4    | 1/24/1977  | 9/18/2007  | 246 | 0.137 | 0.100 | 16,075    | 25,134    | 1,793   |
| 320540          | Iowa River HWY 92 BR AT COLUMBUS JUNCTION         | 7080209 | IA | 41.27885 | -91.3447 | 31,516.5 | 9/22/1976  | 8/2/2006   | 219 | 0.350 | 0.300 | 2,463,978 | 2,664,648 | 119,258 |
| 324015          | CEDAR RIVER AT LEWIS ACCESS, 6.5 MI N OF PALO     | 7080205 | IA | 42.16135 | -91.8107 | 15,903.7 | 5/12/1971  | 12/16/1998 | 519 | 0.403 | 0.300 | 942,259   | 1,135,494 | 61,394  |
| 343033          | Wolf R. at Langlade                               | 4030202 | WI | 45.18998 | -88.7337 | 1,204.9  | 1/25/1977  | 9/20/2007  | 101 | 0.031 | 0.028 | 12,527    | 13,041    | 827     |
| 353068          | Wisconsin R. at Merrill                           | 7070002 | WI | 45.17822 | -89.6862 | 7,122.0  | 1/25/1977  | 9/20/2007  | 248 | 0.056 | 0.051 | 121,160   | 108,747   | 4,406   |
| 373001          | WISCONSIN RIVER AT WAUSAU                         | 7070002 | WI | 44.95773 | -89.6358 | 7,829.1  | 11/19/1970 | 6/19/2001  | 264 | 0.068 | 0.060 | 168,275   | 165,168   | 8,533   |
| 373325          | BIG EAU PLEINE RIVER AT STRATFORD, WI             | 7070002 | WI | 44.82076 | -90.0788 | 632.0    | 2/2/1976   | 9/12/2007  | 91  | 0.232 | 0.220 | 90,697    | 53,883    | 12,493  |
| 380031x         | GRAND R AT MAPLE GROVE RD; RIVES TWP, SEC 35      | 4050004 | MI | 42.34167 | -84.4016 | 932.4    | 8/30/1971  | 9/29/1982  | 125 | 0.165 | 0.122 | 37,858    | 28,732    | 1,682   |
| 380153          | SHEYENNE RIVER - BALHILL DAM                      | 9020204 | ND | 47.02735 | -98.0862 | 9,847.5  | 4/20/1994  | 11/7/2006  | 148 | 0.276 | 0.262 | 44,380    | 71,962    | 2,386   |
| 3822350602001   | HOCKING R. DST LANCASTER - 1ST U.S. RT 33 BRIDGE  | 5030204 | OH | 39.68595 | -82.5738 | 179.7    | 7/10/1974  | 1/8/1997   | 266 | 0.664 | 0.525 | 28,271    | 12,794    | 2,104   |
| 383001          | PESHTIGO RIVER AT PESHTIGO, WI                    | 4030105 | WI | 45.05381 | -87.7471 | 2,794.6  | 12/9/1970  | 8/8/2007   | 294 | 0.036 | 0.030 | 18,779    | 39,316    | 1,731   |
| 390057          | KALAMAZOO R AT "G" AVE BRIDGE; CITY OF AUGUSTA    | 4050003 | MI | 42.33528 | -85.3453 | 2,356.1  | 7/27/1971  | 3/1/1994   | 213 | 0.096 | 0.088 | 67,389    | 91,368    | 2,148   |
| 390553          | South Skunk River CO RD BR E57                    | 7080105 | IA | 41.97322 | -93.5806 | 1,480.0  | 11/8/1979  | 11/9/1998  | 67  | 1.385 | 0.460 | 135,956   | 183,894   | 30,534  |
| 390566          | SOUTH SKUNK RIVER APPROX 3.5 MI NNW OF CAMBRIDGE  | 7080105 | IA | 41.95035 | -93.5511 | 1,523.8  | 10/8/1991  | 9/12/2007  | 185 | 0.793 | 0.400 | 128,169   | 185,076   | 12,880  |
| 391732085414401 | CLIFTY CREEK AT CO RD 1150 E NEAR HARTSVILLE, IN  | 5120206 | IN | 39.29227 | -85.6955 | 227.7    | 3/26/1993  | 8/10/2004  | 33  | 0.211 | 0.070 |           |           |         |
| 394340085524601 | SUGAR CREEK AT CO RD 400 S AT NEW PALESTINE, IN   | 5120204 | IN | 39.72782 | -85.8794 | 239.8    | 5/7/1992   | 8/30/2005  | 271 | 0.086 | 0.060 | 13,564    | 12,430    | 1,090   |
| 40007           | Cannon River                                      | 7040002 | MN | 44.58477 | -92.5628 | 3,835.2  | 10/1/1991  | 11/8/2005  | 251 | 0.206 | 0.161 | 212,965   | 262,802   | 18,194  |
| 410050          | GRAND RIVER AT KNAPP STREET; ADA TWP, SEC 7       | 4050006 | MI | 43.00611 | -85.5425 | 11,577.7 | 8/30/1971  | 3/2/1994   | 225 | 0.093 | 0.091 | 334,229   | 461,681   | 9,992   |
| 410052          | GRAND R AT M-11 BRIDGE; CITY OF GRANDVILLE        | 4050006 | MI | 42.91524 | -85.7667 | 12,790.2 | 8/30/1971  | 3/2/1994   | 261 | 0.141 | 0.120 | 494,823   | 577,501   | 17,430  |
| 413002          | MILWAUKEE RIVER @ BROWN DEER ROAD                 | 4040003 | WI | 43.17769 | -87.9561 | 1,632.4  | 12/16/1970 | 4/18/2001  | 44  | 0.283 | 0.225 |           |           |         |
| 423014          | North Raccoon River CO RD BR D46 SEC 13/24 AT SAC | 7100006 | IA | 42.33971 | -94.9859 | 1,834.5  | 10/9/1979  | 9/10/2007  | 344 | 0.501 | 0.330 | 192,224   | 213,035   | 13,525  |

Table\_S2\_TP

|           |                                                    |         |    |          |          |           |            |            |     |       |       |           |           |         |
|-----------|----------------------------------------------------|---------|----|----------|----------|-----------|------------|------------|-----|-------|-------|-----------|-----------|---------|
| 426046    | South River BRIDGE HIWAY 92                        | 7100008 | IA | 41.37214 | -93.4309 | 1,230.8   | 11/25/1991 | 9/6/2007   | 82  | 0.279 | 0.135 | 154,632   | 88,409    | 35,593  |
| 430380    | Des Moines River CO RD E26 NW OF BOONE             | 7100004 | IA | 42.08029 | -93.9382 | 14,065.6  |            |            |     |       |       |           |           |         |
| 433002    | OCONTO RIVER NEAR OCONTO, WI                       | 4030104 | WI | 44.88271 | -87.8843 | 2,504.5   | 10/26/1988 | 7/11/2007  | 47  | 0.052 | 0.040 | 30,119    | 56,626    | 3,227   |
| 443001    | WISCONSIN RIVER AT RHINELANDER                     | 7070001 | WI | 45.64094 | -89.4205 | 2,221.8   | 4/17/1974  | 12/11/2001 | 115 | 0.041 | 0.040 | 21,175    | 14,299    | 1,110   |
| 443002    | WISCONSIN R AT HAT RAPIDS DAM                      | 7070001 | WI | 45.5742  | -89.4789 | 2,929.2   | 4/17/1974  | 6/30/1999  | 210 | 0.052 | 0.044 | 34,347    | 34,340    | 2,276   |
| 443003    | WISCONSIN RIVER BRIDGE AT MCNAUGHTON               | 7070001 | WI | 45.73376 | -89.5133 | 2,015.8   | 3/27/1979  | 11/29/2001 | 174 | 0.033 | 0.030 | 16,050    | 13,509    | 897     |
| 443015    | East Fk Des Moines River HWY 169 BR 1 MI N ST JOSE | 7100003 | IA | 42.93537 | -94.2271 | 2,439.4   | 7/7/1987   | 12/7/1998  | 136 | 0.356 | 0.300 | 150,994   | 219,531   | 14,626  |
| 443704    | Wapsipinicon River CO RD BR 0.5 MI W. OF D16 N. OF | 7080102 | IA | 42.51197 | -91.9746 | 2,386.1   | 10/30/1979 | 9/10/2007  | 126 | 0.153 | 0.120 | 132,255   | 129,587   | 13,615  |
| 444066    | Des Moines River CO RD BR P59 AT KALO S. OF FT DOD | 7100004 | IA | 42.43159 | -94.1325 | 10,842.0  | 11/16/1979 | 9/10/2007  | 111 | 0.240 | 0.200 | 567,152   | 852,158   | 46,482  |
| 46021     | DUPAGE R OLD RT 6 S CHANNAHON T34N R9E NW20        | 7120004 | IL | 41.41944 | -88.2278 | 954.2     | 10/6/1970  | 2/10/1984  | 54  | 1.358 | 1.200 | 430,050   | 188,179   | 50,625  |
| 47018     | W BR DUPAGE R 2 MI S NAPERVILLE T37N R10E NE6      | 7120004 | IL | 41.72    | -88.1322 | 319.9     | 10/15/1970 | 12/3/1997  | 66  | 1.725 | 1.400 | 155,607   | 70,964    | 7,927   |
| 47041     | HICKORY CR 1 MI NE NEW LENOX T35N R11E NE14        | 7120004 | IL | 41.51611 | -87.973  | 198.8     | 10/7/1970  | 12/3/1997  | 53  | 0.561 | 0.490 | 20,411    | 19,093    | 2,823   |
| 47087     | Kaskaskia River RT 133 BRIDGE IN CHESTERVILLE.     | 7140201 | IL | 39.70266 | -88.3871 | 931.1     | 10/21/1971 | 12/16/1997 | 27  | 0.332 | 0.240 | 97,580    | 66,801    | 19,589  |
| 48046     | FOX R AT WEDRON T34N R4E NE9                       | 7120007 | IL | 41.4319  | -88.7726 | 6,602.5   | 8/30/1971  | 8/30/1996  | 56  | 0.429 | 0.400 | 686,368   | 498,242   | 53,199  |
| 48246     | SALT CR YORK RD HINSDALE T39N R11E SE36            | 7120004 | IL | 41.82083 | -87.9271 | 306.0     | 10/20/1970 | 10/2/1995  | 54  | 1.983 | 1.600 | 162,230   | 66,290    | 7,748   |
| 48247     | SALT CR RT 51 ELMHURST T39N R11E SW14              | 7120004 | IL | 41.86592 | -87.9517 | 253.7     | 7/2/1971   | 10/2/1995  | 51  | 2.013 | 1.566 | 138,599   | 64,037    | 8,257   |
| 48278     | S BR KISHWAUKEE R 1.5 MI W SYCAMORE T41NR4E5E25    | 7090006 | IL | 41.99662 | -88.7222 | 240.5     | 12/14/1971 | 11/13/1997 | 57  | 1.745 | 0.800 | 50,467    | 31,807    | 3,898   |
| 483026    | MISS R.LOCK+DAM # 2 HASTINGS,MN.                   | 7010206 | MN | 44.76058 | -92.8674 | 90,233.2  | 7/19/1971  | 9/15/1994  | 305 | 0.299 | 0.260 | 4,217,109 | 5,695,605 | 153,384 |
| 483027    | Mississippi R. Above LD 3                          | 7040001 | WI | 44.61125 | -92.611  | 109,835.0 | 10/6/1970  | 12/1/1998  | 300 | 0.197 | 0.190 | 3,254,815 | 6,086,895 | 119,451 |
| 48343     | KICKAPOO CR 1 MI SSW CHARLESTON T12N R9E SW22      | 5120112 | IL | 39.46311 | -88.1934 | 253.8     | 1/20/1972  | 9/10/1996  | 46  | 1.007 | 0.560 | 58,475    | 20,990    | 18,968  |
| 48414     | KICKAPOO CR RT 136 BR 1 M W HEYWORTH T22NR2ESW32   | 7130009 | IL | 40.31209 | -89.0144 | 306.9     | 4/19/1972  | 9/24/1997  | 47  | 0.340 | 0.110 | 18,446    | 25,358    | 6,204   |
| 48494     | HURRICANE CR 4 MI WNW HERRIN T8SR1ESE16            | 7140106 | IL | 37.82277 | -89.095  | 62.0      | 1/25/1972  | 2/29/1996  | 64  | 0.872 | 0.475 | 17,156    | 4,013     | 8,566   |
| 48525     | PEATONICA R E EDGE WINSLOW T29N R6E SE22           | 7090003 | IL | 42.49312 | -89.7897 | 2,676.1   | 1/7/1972   | 11/18/1998 | 52  | 0.278 | 0.245 | 138,355   | 255,043   | 59,355  |
| 4CRR11005 | CHEAT RIVER RM 75.6                                | 5020004 | WV | 39.12125 | -79.6756 | 1,850.2   | 5/15/1973  | 3/12/1996  | 115 | 0.016 | 0.009 | 31,962    | 31,097    | 8,363   |
| 500233    | CLINTON R@ NO. BOUND GRATIOT AVE IN MT. CLEMENS    | 4090003 | MI | 42.58417 | -82.8828 | 1,951.2   | 1/17/1974  | 10/8/1998  | 342 | 0.235 | 0.190 | 118,277   | 155,409   | 4,222   |
| 501790    | ROCKY R. AT LAKEWOOD - PARK BLVD. (RM 3.0)         | 4110001 | OH | 41.46944 | -81.8317 | 746.3     | 11/19/1980 | 12/9/1998  | 229 | 0.261 | 0.150 | 87,383    | 64,597    | 12,929  |
| 501810    | ROCKY R. AT FAIRVIEW PARK - PURITAS RD (RM 8.18)   | 4110001 | OH | 41.43778 | -81.8456 | 728.6     | 5/22/1974  | 9/3/1997   | 32  | 0.855 | 0.800 | 127,752   | 63,674    | 44,967  |
| 502070    | CUYAHOGA R AT SHALERSVILLE - DIAGONAL RD-SR 303    | 4110002 | OH | 41.23806 | -81.3031 | 488.7     | 8/8/1973   | 12/10/1998 | 69  | 0.101 | 0.060 | 12,145    | 19,339    | 2,695   |
| 502080    | L. CUYAHOGA R. AT AKRON - OTTO ST GAGE (RM 1.85)   | 4110002 | OH | 41.09444 | -81.5217 | 160.5     | 8/8/1973   | 9/4/1996   | 63  | 0.234 | 0.160 | 15,903    | 7,400     | 3,714   |
| 502130    | CUYAHOGA R. AT CLEVELAND - LOWER HARVARD AVE.      | 4110002 | OH | 41.44778 | -81.685  | 2,032.8   | 10/23/1991 | 12/10/1998 | 82  | 0.344 | 0.250 | 264,052   | 320,539   | 24,497  |
| 503003    | WISCONSIN RIVER ABOVE DUBAY DAM                    | 7070002 | WI | 44.6649  | -89.6505 | 12,483.3  | 8/17/1976  | 4/5/2001   | 195 | 0.097 | 0.080 | 315,893   | 407,145   | 24,642  |
| 503059    | WISCONSIN RIVER ABOVE STEVENS POINT DAM            | 7070003 | WI | 44.51641 | -89.5864 | 12,686.8  | 8/18/1976  | 6/19/2001  | 97  | 0.093 | 0.083 | 341,585   | 403,613   | 23,564  |
| 510017    | MANISTEE R. AT HIGH BR RD; DICKSON TWP, SEC 33     | 4060103 | MI | 44.2675  | -86.0139 | 3,621.4   | 4/8/1975   | 11/26/1990 | 77  | 0.019 | 0.015 | 28,024    | 32,891    | 5,253   |
| 523061    | Root River                                         | 4040002 | WI | 42.78528 | -87.8299 | 478.9     | 1/26/1977  | 9/18/2007  | 259 | 0.270 | 0.179 | 15,482    | 27,065    | 1,204   |
| 53210     | Fox R. at DePere                                   | 4030204 | WI | 44.46111 | -88.0591 | 16,171.5  | 10/17/1988 | 2/16/2005  | 173 | 0.126 | 0.103 | 448,908   | 393,152   | 25,100  |
| 543056    | YAHARA R AT CTH M AT FULTON                        | 7090001 | WI | 42.80806 | -89.1255 | 1,231.4   | 7/18/1977  | 10/26/1997 | 72  | 1.357 | 1.175 | 289,459   | 38,046    | 23,485  |
| 550353    | Tug Fork at Fort Gay, W.Va.                        | 5070201 | WV | 38.11694 | -82.5983 | 4,030.6   | 3/5/1985   | 1/20/2005  | 140 | 0.084 | 0.055 | 171,738   | 62,629    | 28,310  |
| 550446    | Monongahela River below Morgantown, W. Va.         | 5020003 | WV | 39.65806 | -79.9931 | 6,920.1   | 7/16/1974  | 2/17/2005  | 256 | 0.072 | 0.042 | 176,303   | 229,133   | 26,828  |
| 550476    | Coal River at Tomado, W. Va.                       | 5050009 | WV | 38.33889 | -81.8408 | 2,223.3   | 11/13/1973 | 1/7/2005   | 252 | 0.045 | 0.029 | 29,524    | 26,766    | 4,503   |
| 550500    | New River at C&O Railroad Bridge                   | 5050004 | WV | 38.15092 | -81.1799 | 17,993.3  | 11/19/1973 | 1/10/2005  | 250 | 0.061 | 0.046 | 311,302   | 538,070   | 32,522  |
| 550544    | Elk River at Coonskin Park, above Charleston, WV   | 5050007 | WV | 38.38531 | -81.586  | 3,917.8   | 11/13/1973 | 1/5/2005   | 211 | 0.044 | 0.030 | 82,883    | 79,164    | 11,750  |
| 573052    | Wisconsin R. at Wisconsin Del                      | 7070003 | WI | 43.62734 | -89.7808 | 20,688.3  | 2/28/1977  | 9/17/2007  | 245 | 0.078 | 0.080 | 433,567   | 1,036,639 | 11,904  |
| 573081    | BARABOO RIVER 1994 MILWAUKEE BRIDGE                | 7070004 | WI | 43.47032 | -89.7689 | 1,433.7   | 9/23/1997  | 12/3/2001  | 53  | 0.210 | 0.217 | 71,713    | 81,263    | 5,146   |
| 573082    | BARABOO RIVER AT HWY 113                           | 7070004 | WI | 43.45833 | -89.7165 | 1,455.5   | 9/23/1997  | 12/3/2001  | 53  | 0.208 | 0.209 | 70,081    | 83,969    | 4,973   |
| 580046    | RAISIN R. AT ERA DOCK NEAR MOUTH; CITY OF MONROE   | 4100002 | MI | 41.90056 | -83.3544 | 2,743.0   | 10/12/1970 | 10/8/1998  | 281 | 0.177 | 0.133 | 39,377    | 116,046   | 3,688   |
| 600150    | GREAT MIAMI R. AT MIAMISBURG - S.R. 725            | 5080002 | OH | 39.64444 | -84.2897 | 7,015.9   | 7/28/1994  | 12/17/1998 | 38  | 0.587 | 0.460 | 1,029,081 | 753,083   | 325,539 |
| 600810    | SCIOTO R. AT SHADEVILLE - S.R. 665                 | 5060001 | OH | 39.8325  | -83.0083 | 4,387.8   | 1/4/1971   | 10/28/1996 | 901 | 1.407 | 1.100 | 990,851   | 506,806   | 27,821  |
| 600850    | SCIOTO R. AT COLUMBUS - MOUND ST.                  | 5060001 | OH | 39.95222 | -83.0125 | 4,183.1   | 1/4/1971   | 6/3/1996   | 577 | 0.419 | 0.300 | 643,934   | 386,623   | 31,483  |
| 600870    | SCIOTO R. AT COLUMBUS - FRANK RD.                  | 5060001 | OH | 39.91667 | -83.0097 | 4,205.8   | 1/4/1971   | 10/15/1996 | 651 | 0.365 | 0.300 | 668,263   | 387,647   | 34,169  |
| 600880    | SCIOTO R. AT COLUMBUS - I-270 S.                   | 5060001 | OH | 39.88062 | -83.0179 | 4,232.5   | 1/4/1971   | 10/28/1996 | 920 | 1.459 | 1.100 | 949,243   | 503,708   | 23,748  |
| 600900    | SCIOTO R. NR COMMERCIAL POINT - S.R. 762           | 5060001 | OH | 39.77417 | -83.0075 | 5,879.7   | 1/4/1971   | 10/28/1996 | 943 | 1.300 | 1.025 | 1,356,721 | 710,542   | 39,571  |
| 600910    | SCIOTO R. NR SOUTH BLOOMFIELD - S.R. 316           | 5060001 | OH | 39.71944 | -83.0125 | 5,987.4   | 1/4/1971   | 10/7/1996  | 846 | 1.272 | 1.000 | 1,518,460 | 714,732   | 49,846  |
| 600920    | SCIOTO R. DST CHILLICOTHE - U.S. RT. 35            | 5060002 | OH | 39.30556 | -82.9203 | 10,010.7  | 6/8/1973   | 9/23/1997  | 222 | 0.535 | 0.460 | 1,573,257 | 995,449   | 95,212  |
| 600960    | SCIOTO R. AT CIRCLEVILLE - U.S. RT. 22             | 5060002 | OH | 39.60139 | -82.9553 | 8,331.7   | 1/22/1976  | 9/16/1996  | 82  | 0.689 | 0.500 | 1,253,957 | 870,411   | 179,615 |
| 601000    | SCIOTO R. AT PIKETON - U.S. RT. 23 (RM 34.50)      | 5060002 | OH | 39.07222 | -83.0056 | 15,114.5  | 1/4/1973   | 9/23/1997  | 273 | 0.308 | 0.220 | 1,169,174 | 1,227,124 | 37,551  |
| 601010    | SCIOTO R. AT JASPER - S.R. 124 (RM 30.08)          | 5060002 | OH | 39.04716 | -83.05   | 15,135.1  | 1/4/1973   | 9/23/1997  | 269 | 0.289 | 0.220 | 1,099,036 | 1,233,078 | 32,222  |
| 601290    | OLENTANGY R. NR WORTHINGTON - I-270 N.             | 5060001 | OH | 40.11091 | -83.0329 | 1,284.0   | 2/4/1976   | 1/23/1997  | 114 | 0.188 | 0.157 | 83,610    | 101,586   | 9,783   |
| 601340    | SCIOTO R. UPST CIRCLEVILLE - FLORENCE CHAPEL RD.   | 5060001 | OH | 39.63278 | -82.9625 | 6,830.3   | 10/23/1975 | 1/8/1997   | 255 | 0.670 | 0.470 | 876,946   | 766,235   | 49,814  |
| 601350    | MILL CREEK OFF WALDO ROAD - MARYSVILLE (RM 16.8)   | 5060001 | OH | 40.25583 | -83.3453 | 235.4     | 5/17/1977  | 1/23/1997  | 237 | 1.777 | 0.940 | 34,304    | 46,722    | 2,778   |
| 601400    | RACCOON CREEK AT ADAMSVILLE - U.S. RT. 35          | 5090101 | OH | 38.87361 | -82.3561 | 1,518.7   | 10/25/1977 | 12/14/1998 | 129 | 0.072 | 0.050 | 32,906    | 52,403    | 6,577   |

|             |                                                    |         |    |          |          |           |            |            |     |       |       |           |           |         |
|-------------|----------------------------------------------------|---------|----|----------|----------|-----------|------------|------------|-----|-------|-------|-----------|-----------|---------|
| 601930      | TUSCARAWAS R. AT MASSILLON - WARMINGTON ST.        | 5040001 | OH | 40.75222 | -81.5292 | 1,343.7   | 3/31/1976  | 12/22/1998 | 269 | 0.471 | 0.400 | 161,268   | 168,634   | 7,094   |
| 601940      | NIMSHILLIN CRK DST N. INDUSTRY - HOWENSTINE RD.    | 5040001 | OH | 40.71718 | -81.3473 | 463.2     | 4/2/1976   | 12/22/1998 | 262 | 0.788 | 0.660 | 137,352   | 137,054   | 5,556   |
| 602280      | MAHONING R. AT LEAVITTSBURG - LEAVITT RD.          | 5030103 | OH | 41.23944 | -80.8811 | 1,487.5   | 1/8/1971   | 12/22/1998 | 402 | 0.167 | 0.090 | 28,686    | 72,614    | 3,482   |
| 603095      | Sheboygan R. at Esslingen Par                      | 4030101 | WI | 43.74053 | -87.7512 | 1,103.7   | 2/23/1977  | 9/10/2007  | 321 | 0.197 | 0.160 | 46,029    | 78,662    | 2,604   |
| 610060      | GREAT MIAMI R. AT DAYTON - MONUMENT AVE.           | 5080002 | OH | 39.76334 | -84.2021 | 6,491.1   | 10/12/1978 | 12/17/1998 | 233 | 0.266 | 0.240 | 612,828   | 527,885   | 37,778  |
| 610520      | L. MIAMI R. NR MORROW - STUBBS MILL RD.            | 5090202 | OH | 39.3634  | -84.1735 | 2,498.5   | 4/7/1976   | 9/1/1998   | 72  | 0.410 | 0.320 | 272,859   | 215,185   | 36,419  |
| 610530      | E FK L MIAMI R NR MILFORD - NR TERRACE PARK C.C.   | 5090202 | OH | 39.15526 | -84.2898 | 1,292.6   | 2/28/1978  | 9/8/1998   | 62  | 0.460 | 0.330 | 165,304   | 137,900   | 23,936  |
| 611740      | MUSKINGUM R. DST COSHOCTON - S.R. 83               | 5040004 | OH | 40.23547 | -81.8713 | 12,562.8  | 4/7/1976   | 12/16/1998 | 213 | 0.197 | 0.140 | 882,084   | 1,093,357 | 57,952  |
| 611790      | TUSCARAWAS R. AT NEWCOMERSTOWN - RIVER ST.         | 5040001 | OH | 40.26139 | -81.6092 | 6,322.3   | 10/28/1977 | 12/16/1998 | 239 | 0.203 | 0.150 | 473,561   | 541,810   | 26,865  |
| 63029       | Mississippi R. Above LD 4                          | 7040003 | WI | 44.32495 | -91.9227 | 141,590.8 | 1/24/1977  | 12/1/1998  | 265 | 0.142 | 0.126 | 4,123,077 | 6,876,536 | 88,569  |
| 643509      | Wis R Tailwater - Otter RPS Dam                    | 7070001 | WI | 45.90361 | -89.3214 | 1,427.1   | 8/10/1999  | 11/29/2001 | 29  | 0.039 | 0.037 | 14,632    | 9,758     | 987     |
| 683096      | Fox (IL) R. below Waukesha                         | 7120006 | WI | 42.93375 | -88.2928 | 475.2     | 1/26/1977  | 1/30/2007  | 221 | 0.214 | 0.180 | 16,872    | 117,656   | 1,066   |
| 693035      | Wolf R. at New London                              | 4030202 | WI | 44.3917  | -88.7496 | 6,123.2   | 1/19/1977  | 9/5/2007   | 302 | 0.075 | 0.065 | 129,575   | 177,282   | 6,357   |
| 6ACNR009.17 | Cranes Nest River N.E. FROM ROUTE 83               | 5070202 | VA | 37.15083 | -82.4108 | 198.6     | 4/13/1982  | 11/2/1998  | 124 | 0.107 | 0.100 | 5,276     | 2,390     | 1,111   |
| 6ADIS001.24 | Dismal Creek, RT. 666 BRIDGE                       | 5070202 | VA | 37.24278 | -82.0275 | 223.0     | 7/21/1979  | 12/14/1998 | 150 | 0.082 | 0.100 | 2,862     | 4,058     | 777     |
| 6AKOX008.11 | Knox Creek RT. 697 AT STATE LINE                   | 5070201 | KY | 37.47064 | -82.0624 | 228.9     | 7/31/1979  | 12/14/1998 | 148 | 0.090 | 0.100 | 6,336     | 3,272     | 1,330   |
| 6ALEV131.52 | Levisa Fork WELLMORE COAL CO.DOCK #14 BR OFF 460 . | 5070202 | VA | 37.34833 | -82.2056 | 770.1     | 6/17/1992  | 12/14/1998 | 73  | 0.022 | 0.020 | 10,310    | 13,593    | 2,369   |
| 6ALEV143.86 | Levisa Fork TEEL BR.ON RAILROAD AVE OFF RT 83, .1  | 5070202 | VA | 37.27694 | -82.1008 | 505.9     | 6/17/1992  | 12/14/1998 | 73  | 0.024 | 0.020 | 6,122     | 8,933     | 1,388   |
| 6AMCR007.46 | McClure River RT. 63 BR N OF CLINCH                | 5070202 | VA | 37.16831 | -82.361  | 251.0     | 8/29/1979  | 12/7/1998  | 150 | 0.092 | 0.100 | 4,561     | 3,597     | 936     |
| 6ARSS026.98 | Russell Fork UPSTREAM OF LAZARUS BR & DOWNSTR RT 7 | 5070202 | VA | 37.1925  | -82.2878 | 389.9     | 5/14/1992  | 12/7/1998  | 42  | 0.018 | 0.020 | 3,037     | 6,130     | 1,054   |
| 6ASAT000.03 | Slate Creek RT. 460 BRIDGE IN GRUNDY               | 5070202 | VA | 37.27889 | -82.0994 | 106.2     | 7/31/1979  | 9/11/1986  | 75  | 0.087 | 0.100 |           |           |         |
| 70005       | BLACK RIVER NEAR GALESVILLE, WI                    | 7040007 | WI | 43.96192 | -91.3371 | 5,868.2   | 5/6/1993   | 11/9/2005  | 240 | 0.147 | 0.130 | 328,883   | 222,994   | 22,016  |
| 713001      | FOX RIVER AT OMRO                                  | 4030201 | WI | 44.04014 | -88.7446 | 3,829.4   | 12/15/1970 | 2/13/1996  | 103 | 0.113 | 0.100 | 135,490   | 87,016    | 7,857   |
| 713002      | Fox R. at Neenah and Menasha                       | 4030203 | WI | 44.18647 | -88.4565 | 15,567.1  | 7/17/1986  | 9/5/2007   | 269 | 0.086 | 0.074 | 351,236   | 242,713   | 17,641  |
| 723002      | Wisconsin R. at Biron                              | 7070003 | WI | 44.43405 | -89.7764 | 13,944.2  | 8/17/1976  | 9/19/2007  | 273 | 0.105 | 0.100 | 365,244   | 467,860   | 13,071  |
| 723020      | WISCONSIN RIVER AT FTH 73 IN NEKOOSA               | 7070003 | WI | 44.31438 | -89.8884 | 14,230.6  | 2/8/1978   | 4/5/2001   | 98  | 0.134 | 0.120 | 467,337   | 563,903   | 29,958  |
| 730023      | SHIAWASSEE R@ SETH RD.; ST. CHARLES TWP SEC 22     | 4080203 | MI | 43.25472 | -84.1056 | 1,576.2   | 8/31/1971  | 3/8/1994   | 72  | 0.118 | 0.082 | 54,605    | 47,146    | 5,663   |
| 730150      | SAGINAW R OFF CENTER ST BR; SAGINAW TWP, SEC 35    | 4080206 | MI | 43.40222 | -83.9661 | 15,322.4  | 1/29/1974  | 6/18/1996  | 96  | 0.165 | 0.142 | 384,704   | 423,842   | 22,759  |
| 740144      | BLACK R AT 10TH AVE. BRIDGE; CITY OF PORT HURON    | 4090001 | MI | 42.98083 | -82.4336 | 1,836.3   | 5/21/1973  | 6/18/1978  | 56  | 0.097 | 0.076 | 106,279   | 67,593    | 12,078  |
| 740153      | BLACK R AT WADHAMS RD BRIDGE; KIMBALL TWP, SEC 2   | 4090001 | MI | 42.98981 | -82.5378 | 1,759.8   | 5/22/1973  | 3/29/1994  | 260 | 0.100 | 0.078 | 103,424   | 65,655    | 5,551   |
| 784016      | ENGLISH RIVER AT BRIDGE CO RD W61 AT RIVERSIDE     | 7080209 | IA | 41.47548 | -91.5802 | 1,626.8   | 7/9/1987   | 9/11/2007  | 330 | 0.394 | 0.200 | 220,047   | 225,881   | 19,155  |
| 80001       | LaCrosse River                                     | 7040006 | WI | 43.81882 | -91.2535 | 1,234.4   | 10/4/1999  | 9/18/2007  | 125 | 0.170 | 0.150 | 48,353    | 42,345    | 2,208   |
| 810006      | SALINE R AT MAPLE RD BRIDGE; SALINE TWP, SEC 13    | 4100002 | MI | 42.13    | -83.7756 | 247.6     | 9/1/1971   | 10/8/1980  | 40  | 0.318 | 0.170 | 14,444    | 9,033     | 3,265   |
| 810042      | HURON R AT SUPERIOR RD BR; SUPERIOR TWP, SEC 32    | 4090005 | MI | 42.25954 | -83.6394 | 2,060.6   | 9/1/1971   | 3/30/1994  | 262 | 0.093 | 0.080 | 40,209    | 74,535    | 1,408   |
| 810242      | HURON R AT HURON BR PARK; ANN ARBOR TWP., SEC 17   | 4090005 | MI | 42.30333 | -83.7467 | 1,892.3   | 4/16/1975  | 3/30/1994  | 224 | 0.030 | 0.029 | 14,328    | 55,789    | 717     |
| 821004      | CEDAR CREEK AT BRIDGE 3 MI WNW OF OAKLAND MILLS    | 7080107 | IA | 40.94456 | -91.6783 | 1,383.1   | 10/20/1986 | 12/1/1998  | 137 | 0.329 | 0.200 | 111,964   | 162,434   | 13,894  |
| 9-CRK003.00 | Crooked Creek, RT. 635 BRIDGE AT INTERSECTION WITH | 5050001 | VA | 36.76861 | -80.9078 | 185.7     | 6/18/1992  | 11/30/1998 | 38  | 0.044 | 0.030 | 5,504     | 6,624     | 1,445   |
| 9-EKC003.78 | AT MT CARMEL CHURCH ON RT 650, 1.8 MI OFF RT 660   | 5050001 | VA | 36.69806 | -81.0575 | 164.4     | 5/21/1992  | 12/17/1998 | 40  | 0.072 | 0.060 | 8,812     | 5,922     | 2,657   |
| 9-FXC000.84 | LOW WATER BRIDGE OFF RT 711, APPROX .75 MI W. FOX  | 5050001 | VA | 36.61444 | -81.3056 | 197.9     | 5/21/1992  | 11/30/1998 | 38  | 0.027 | 0.020 | 3,136     | 4,062     | 804     |
| 9-LRV000.34 | Little River RT. 605 BRIDGE, S OF RADFORD          | 5050001 | VA | 37.07861 | -80.5753 | 910.7     | 9/25/1997  | 11/4/1998  | 6   | 0.100 | 0.100 |           |           |         |
| 9-NEW081.72 | New River RT. 11 BRIDGE AT RADFORD                 | 5050001 | VA | 37.13861 | -80.575  | 7,151.9   | 7/25/1999  | 12/8/1998  | 216 | 0.105 | 0.100 | 307,115   | 250,765   | 7,341   |
| 9-NEW107.51 | New River STA #25 ALLSONIA AT GAGE (PULASKI COUNTY | 5050001 | VA | 36.93639 | -80.7461 | 5,726.1   | 11/29/1993 | 12/7/1998  | 57  | 0.041 | 0.030 | 179,648   | 193,974   | 31,452  |
| 9-NEW187.46 | New River OFF RT. 58 AT MOUTH OF WILSON OR RT. 93  | 5050001 | VA | 36.58531 | -81.3142 | 1,744.4   | 7/11/1979  | 12/17/1998 | 197 | 0.086 | 0.100 | 67,492    | 45,553    | 7,432   |
| 9-WFC016.45 | Wolf Creek at PRIVATELY OWNED LOW WATER BR OFF RT  | 5050002 | VA | 37.25641 | -81.0143 | 505.6     | 6/15/1992  | 11/3/1998  | 32  | 0.020 | 0.020 | 4,148     | 10,253    | 1,221   |
| 9-WLK004.34 | Walker Creek RT. 622 BRIDGE, BELOW PEARISBURG      | 5050002 | VA | 37.29651 | -80.7063 | 791.9     | 8/25/1997  | 11/17/1998 | 6   | 0.100 | 0.100 |           |           |         |
| 9-WLS002.57 | Wilson Creek, RT 721 BRIDGE OFF RT 56/16, APPROX   | 5050001 | VA | 36.59972 | -81.3547 | 75.6      | 6/10/1992  | 11/30/1998 | 38  | 0.029 | 0.020 | 1,040     | 2,025     | 285     |
| 90003       | Upper Iowa River                                   | 7060002 | IA | 43.47444 | -91.2944 | 2,568.5   | 10/26/1979 | 9/20/2004  | 387 | 0.174 | 0.127 | 135,285   | 240,215   | 16,354  |
| 93001       | Chippewa R. at Chippewa Falls                      | 7050005 | WI | 44.93001 | -91.397  | 14,346.7  | 10/6/1970  | 1/11/2005  | 136 | 0.051 | 0.048 | 243,751   | 253,811   | 11,468  |
| AR01        | Allgheny River at Aspinwall, PA (rmi -7.4)         | 5010009 | PA | 40.48684 | -79.9049 | 30,097.8  | 1/19/1995  | 7/5/2006   | 69  | 0.085 | 0.050 | 1,315,839 | 863,318   | 361,602 |
| ATH 02      | S Fork Saline R.                                   | 5140204 | IL | 37.67973 | -88.8037 | 212.7     | 4/11/1983  | 12/10/1998 | 140 | 0.101 | 0.060 | 16,871    | 8,782     | 2,435   |
| CAS0479     | CASSELMAN R. CROS. BY RIVER RD. AT USGS STA.       | 5020006 | MD | 39.70389 | -79.14   | 165.2     | 3/26/1974  | 8/4/1998   | 149 | 0.053 | 0.034 | 5,135     | 3,175     | 749     |
| GMW020-0001 | Greens Fk                                          | 5080003 | IN | 39.77167 | -85.1092 | 223.4     | 3/19/1997  | 9/23/2003  | 60  | 0.065 | 0.030 |           |           |         |
| GMW040-0005 | Whitewater River                                   | 5080003 | IN | 39.49806 | -85.1825 | 1,497.0   | 3/18/1997  | 3/1/2006   | 90  | 0.061 | 0.030 | 162,541   | 84,564    | 48,402  |
| GMW080-0001 | Whitewater River                                   | 5080003 | IN | 39.35333 | -84.9428 | 3,418.3   | 2/13/1986  | 3/1/2006   | 136 | 0.067 | 0.040 | 166,396   | 221,803   | 30,412  |
| K3250000    | S FORK NEW RIV AT NC 16 AND 88 NR JEFFERSON        | 5050001 | NC | 36.39473 | -81.4075 | 533.6     | 4/23/1981  | 8/22/2007  | 164 | 0.049 | 0.030 | 18,755    | 15,286    | 2,393   |
| K4500000    | S FORK NEW RIV AT NC 221 NR SCOTTVILLE             | 5050001 | NC | 36.4738  | -81.3365 | 778.2     | 10/2/1974  | 9/26/2007  | 178 | 0.065 | 0.030 | 41,669    | 23,866    | 6,970   |
| K7900000    | NEW RIV AT SR 1345 AT AMELIA                       | 5050001 | NC | 36.5519  | -81.1817 | 2,141.8   | 10/18/1976 | 9/26/2007  | 236 | 0.073 | 0.045 | 87,303    | 57,291    | 8,740   |
| LEJ050-0006 | Fish Cr                                            | 4100003 | IN | 41.55861 | -84.8356 | 105.7     | 4/6/1999   | 2/6/2006   | 70  | 0.069 | 0.060 | 3,046     | 7,551     | 321     |
| LEJ050-0007 | Fish Cr                                            | 4100003 | IN | 41.465   | -84.8142 | 174.9     | 4/6/1999   | 2/6/2006   | 84  | 0.077 | 0.060 | 5,628     | 8,691     | 625     |
| LEJ060-0006 | ST Joseph River                                    | 4100003 | IN | 41.3475  | -84.8439 | 1,571.2   | 4/6/1999   | 2/6/2006   | 76  | 0.127 | 0.110 | 87,017    | 68,773    | 7,350   |

Table\_S2\_TP

|                 |                                                  |         |    |          |          |           |            |            |     |       |       |            |            |           |
|-----------------|--------------------------------------------------|---------|----|----------|----------|-----------|------------|------------|-----|-------|-------|------------|------------|-----------|
| LEJ090-0008     | Cedar Cr                                         | 4100003 | IN | 41.21889 | -85.0767 | 785.3     | 4/6/1999   | 7/9/2001   | 28  | 0.103 | 0.090 | 45,207     | 44,872     | 9,996     |
| LEJ090-0026     | Cedar Cr                                         | 4100003 | IN | 41.215   | -85.0514 | 787.7     | 8/27/2001  | 1/23/2006  | 49  | 0.105 | 0.070 | 59,876     | 45,095     | 8,614     |
| LEJ100-0003     | ST Joseph River                                  | 4100003 | IN | 41.08917 | -85.1292 | 2,808.5   | 11/15/1983 | 1/23/2006  | 239 | 0.158 | 0.130 | 177,582    | 138,301    | 11,790    |
| LEM010-0012     | Maumee River                                     | 4100005 | IN | 41.08194 | -85.1147 | 4,855.0   | 2/18/1971  | 1/23/2006  | 178 | 0.236 | 0.200 | 405,136    | 417,022    | 32,410    |
| LEM010-0013     | Maumee River                                     | 4100005 | IN | 41.16906 | -84.8493 | 5,223.8   | 3/24/1971  | 1/23/2006  | 373 | 0.282 | 0.230 | 440,489    | 486,335    | 25,569    |
| LEM010-0014     | Maumee River                                     | 4100005 | IN | 41.08444 | -85.0206 | 4,962.3   | 1/13/1971  | 1/23/2006  | 407 | 0.347 | 0.230 | 376,046    | 473,992    | 26,914    |
| LES040-0007     | St. Mary's River                                 | 4100004 | IN | 40.77917 | -84.8422 | 1,305.6   | 6/5/1979   | 2/7/2006   | 301 | 0.304 | 0.265 | 136,714    | 190,676    | 7,834     |
| LES060-0004     | ST Mary's River                                  | 4100004 | IN | 41.08389 | -85.1358 | 2,042.1   | 1/7/1986   | 1/23/2006  | 219 | 0.283 | 0.250 | 242,452    | 278,456    | 15,064    |
| LES060-0005     | ST Mary's River                                  | 4100004 | IN | 40.99111 | -85.1169 | 1,847.3   | 1/8/1991   | 1/23/2006  | 162 | 0.280 | 0.270 | 248,968    | 262,509    | 15,113    |
| LMG050-0006     | Salt Cr                                          | 4040001 | IN | 41.59972 | -87.1464 | 192.5     | 1/14/1986  | 1/30/2006  | 229 | 0.138 | 0.130 | 11,707     | 12,351     | 611       |
| LMG050-0007     | Salt Cr                                          | 4040001 | IN | 41.49861 | -87.1417 | 92.1      | 1/18/1973  | 9/4/2003   | 346 | 0.173 | 0.140 | 4,100      | 8,169      | 249       |
| LMG060-0008     | E Br Little Calumet River                        | 4040001 | IN | 41.61694 | -87.1261 | 179.7     | 2/23/1971  | 1/30/2006  | 395 | 0.142 | 0.100 | 6,035      | 9,383      | 396       |
| LMJ120-0009     | Pigeon River                                     | 4050001 | IN | 41.74    | -85.5569 | 875.4     | 4/15/1999  | 2/8/2006   | 81  | 0.043 | 0.030 | 11,616     | 32,768     | 1,389     |
| LMJ150-0004     | ST Joseph River                                  | 4050001 | IN | 41.72278 | -85.8147 | 6,387.9   | 2/10/1971  | 2/8/2006   | 375 | 0.088 | 0.050 | 125,376    | 239,671    | 10,022    |
| LMJ190-0006     | Elkhart River                                    | 4050001 | IN | 41.50778 | -85.7594 | 867.9     | 4/14/1999  | 2/8/2006   | 78  | 0.066 | 0.055 | 23,779     | 38,060     | 2,284     |
| LMJ210-0008     | Elkhart River                                    | 4050001 | IN | 41.68778 | -85.9722 | 1,792.2   | 1/19/1973  | 2/8/2006   | 376 | 0.130 | 0.080 | 53,170     | 97,225     | 3,234     |
| LMJ240-0008     | ST Joseph River                                  | 4050001 | IN | 41.74444 | -86.2728 | 9,395.8   | 3/11/1971  | 12/19/2002 | 350 | 0.147 | 0.090 | 332,469    | 427,177    | 28,913    |
| LMJ240-0009     | ST Joseph River                                  | 4050001 | IN | 41.67111 | -86.1536 | 9,151.7   | 2/18/1986  | 5/9/2002   | 179 | 0.080 | 0.050 | 147,541    | 399,606    | 13,862    |
| LMJ240-0026     | ST Joseph River                                  | 4050001 | IN | 41.66639 | -86.1678 | 9,155.3   | 6/19/2002  | 2/8/2006   | 43  | 0.046 | 0.040 | 171,707    | 399,663    | 34,804    |
| LRFB-.5-BB14A71 | BIG FORK RIVER BRIDGE ON MN-11, 4 MI E OF LOMAN  | 9030006 | MN | 48.5125  | -93.71   | 3,884.3   | 7/27/1971  | 9/9/1992   | 88  | 0.074 | 0.050 | 64,555     | 56,139     | 7,515     |
| LRLF7.5-BB14A71 | LITTLE FORK R MN-11 BRIDGE, 0.5 MI W OF PELLAND  | 9030005 | MN | 48.52132 | -93.5866 | 4,718.2   | 7/27/1971  | 11/3/1994  | 82  | 0.090 | 0.064 | 124,277    | 57,231     | 13,321    |
| LSSL-52-BC15E53 | ST. LOUIS R BRIDGE ON US-2, 2 MI SE OF BROOKSTON | 4010201 | MN | 46.84944 | -92.5758 | 8,425.6   | 10/19/1970 | 11/8/1994  | 233 | 0.071 | 0.053 | 153,553    | 103,980    | 7,975     |
| LY00004         | LIT. YOUGH. R. OLD FOOT BR. 0.4M. AB. MOUTH      | 5020006 | MD | 39.41831 | -79.4192 | 105.7     | 3/27/1974  | 12/5/1995  | 144 | 0.147 | 0.102 | 7,864      | 2,878      | 885       |
| M03P19          | E FK TODD FORK AT CLARKSVILLE - SR 133/132       | 5090202 | OH | 39.39861 | -83.9831 | 98.8      | 12/10/1981 | 9/10/1998  | 56  | 0.284 | 0.080 |            |            |           |
| MNCO-.5-B-14A67 | COTTONWOOD R AT MN-15, 0.5 MI SE OF NEW ULM      | 7020008 | MN | 44.28237 | -94.4356 | 3,372.6   | 10/6/1970  | 11/16/1998 | 219 | 0.223 | 0.160 | 168,911    | 263,491    | 23,937    |
| MNMN-91-BB15E71 | MINNESOTA RIVER AT BRIDGE ON MN-22 AT ST. PETER  | 7020007 | MN | 44.30742 | -93.9596 | 36,896.9  | 7/20/1971  | 8/6/1998   | 246 | 0.319 | 0.284 | 1,355,647  | 2,811,275  | 98,268    |
| MR01            | Monongahela River near South Pittsburgh, PA      | 5020005 | PA | 40.41026 | -79.953  | 19,078.8  | 7/6/1976   | 9/7/2004   | 324 | 0.118 | 0.080 | 770,239    | 630,122    | 95,758    |
| MS216           | PRAIRIE CR AT 310TH ST .2 MI UPSTM OF L BYLLESBY | 7040002 | MN | 44.50056 | -92.9925 | 196.5     | 9/7/1989   | 9/24/1998  | 53  | 0.092 | 0.061 | 6,152      | 10,003     | 1,426     |
| MSCW-.2-B-14A53 | CROW RIVER AT BRIDGE ON CSAH-36 AT DAYTON        | 7010203 | MN | 45.24471 | -93.522  | 6,685.9   | 11/3/1970  | 11/11/1998 | 157 | 0.302 | 0.268 | 285,099    | 531,799    | 24,781    |
| MSRM-.6-BB14A53 | RUM RIVER AT BRIDGE ON PLEASANT STREET IN ANOKA  | 7010207 | MN | 45.2066  | -93.3867 | 4,055.4   | 10/5/1970  | 8/6/1998   | 110 | 0.139 | 0.119 | 53,458     | 97,207     | 7,161     |
| MSRM-34-BB14A55 | RUM RIVER BRIDGE ON CSAH-5, 0.5 MI W OF ISANTI   | 7010207 | MN | 45.49333 | -93.2669 | 3,314.8   | 6/7/1974   | 9/7/1994   | 200 | 0.136 | 0.115 | 75,574     | 82,746     | 3,436     |
| MSU--68CBB15E53 | MISSISSIPPI R UPSTREM OF MN-15 BR AT SAUK RAPIDS | 7010201 | MN | 45.59813 | -94.1879 | 30,255.0  | 9/21/1988  | 9/30/1996  | 57  | 0.087 | 0.071 | 379,315    | 467,189    | 47,572    |
| MSU-859--01E53  | MISSISSIPPI R MPLS WATERWORKS INTAKE AT FRIDLEY  | 7010206 | MN | 45.04917 | -93.2792 | 47,566.3  | 10/5/1970  | 8/6/1998   | 220 | 0.118 | 0.111 | 718,770    | 1,391,815  | 55,780    |
| MSU-982CBB15E67 | MISSISSIPPI RIVER AT BR ON MN-115 AT CAMP RIPLEY | 7010104 | MN | 46.07472 | -94.3344 | 26,472.7  | 11/4/1970  | 7/21/1998  | 234 | 0.073 | 0.055 | 181,993    | 298,717    | 18,034    |
| MSU1186-BB15E67 | MISSISSIPPI R AT MN-6 BRIDGE 8 MI SW OF COHASSET | 7010101 | MN | 47.22955 | -93.7572 | 7,549.5   | 10/19/1970 | 9/16/1996  | 216 | 0.052 | 0.040 | 55,952     | 22,167     | 3,532     |
| MSU1292-BB15E67 | MISSISSIPPI R AT BR ON CSAH-8 7 MI E OF BEMIDJI  | 7010101 | MN | 47.45333 | -94.7122 | 1,639.3   | 9/22/1987  | 9/16/1996  | 56  | 0.061 | 0.044 | 5,437      | 12,819     | 1,048     |
| MU01            | Muskingum River near Devola, OH                  | 5040004 | OH | 39.47028 | -81.4911 | 20,773.8  | 7/8/1976   | 7/11/2006  | 221 | 0.217 | 0.120 | 1,722,147  | 1,508,996  | 231,085   |
| NF01            | Ohio River near Stratton, OH                     | 5030101 | WV | 40.52754 | -80.6259 | 61,752.2  | 7/9/1992   | 7/13/2006  | 84  | 0.069 | 0.060 | 1,988,212  | 2,513,184  | 170,581   |
| NF03            | Great Miami River near Elizabethtown, OH         | 5080002 | OH | 39.15326 | -84.7952 | 13,864.7  | 7/3/1973   | 7/26/2006  | 314 | 0.365 | 0.340 | 1,138,276  | 1,353,663  | 97,714    |
| NF04            | Green River near Quinn Landing, KY               | 5110005 | KY | 37.6473  | -87.4956 | 21,392.3  | 10/11/1976 | 7/13/2006  | 302 | 0.129 | 0.090 | 1,109,262  | 1,914,023  | 118,347   |
| OBS140-0004     | Blue River                                       | 5140104 | IN | 38.43389 | -86.1917 | 724.9     | 1/17/1973  | 3/2/2006   | 256 | 0.090 | 0.063 | 25,674     | 61,355     | 2,732     |
| OBS150-0008     | Blue River                                       | 5140104 | IN | 38.22056 | -86.2983 | 1,286.6   | 4/7/1999   | 2/8/2006   | 83  | 0.092 | 0.070 | 56,707     | 91,933     | 8,617     |
| OR15            | Ohio River near Louisville, KY                   | 5140101 | KY | 38.28244 | -85.7039 | 235,672.3 | 10/12/1976 | 7/26/2006  | 302 | 0.206 | 0.110 | 23,379,918 | 12,731,093 | 2,432,471 |
| OR21            | Ohio River near Smithland, KY                    | 5140203 | KY | 37.14613 | -88.4116 | 371,652.1 | 1/19/1982  | 7/10/2006  | 156 | 0.197 | 0.100 | 29,835,507 | 24,208,157 | 4,326,031 |
| P06S08          | MAUMEE R. AT EATER RD. (RM 91.48)                | 4100005 | OH | 41.22194 | -84.6697 | 5,469.3   | 7/24/1984  | 9/30/1997  | 55  | 0.203 | 0.160 | 507,049    | 495,935    | 51,552    |
| PRI002          | TUG FORK AT KERMIT, W. VA.                       | 5070201 | WV | 37.838   | -82.4096 | 3,309.5   | 2/19/1985  | 11/16/2006 | 202 | 0.045 | 0.026 | 70,641     | 52,196     | 15,938    |
| PRI003          | TUG FORK AT STATE LINE                           | 5070201 | WV | 37.56611 | -82.1439 | 2,127.2   | 3/27/1979  | 7/20/2006  | 104 | 0.045 | 0.035 | 27,987     | 34,078     | 5,490     |
| PRI008          | SOUTH FORK CUMBERLAND RIVER AT BLUE HERON        | 5130104 | KY | 36.67028 | -84.5489 | 2,463.2   | 10/12/1983 | 6/21/2006  | 81  | 0.020 | 0.011 | 53,092     | 52,326     | 19,561    |
| PRI010          | ROCKCASTLE RIVER AT BILLOWS                      | 5130102 | KY | 37.17139 | -84.2967 | 1,558.2   | 3/20/1979  | 6/19/2006  | 268 | 0.021 | 0.013 | 18,452     | 55,638     | 3,580     |
| PRI014          | ROUGH RIVER NEAR DUNDEE                          | 5110004 | KY | 37.56278 | -86.7708 | 1,991.8   | 6/20/1979  | 12/12/2006 | 177 | 0.057 | 0.046 | 73,212     | 130,016    | 8,544     |
| PRI021          | NOLIN RIVER AT WHITE MILLS                       | 5110001 | KY | 37.55502 | -86.0319 | 919.4     | 3/25/1980  | 12/14/2006 | 273 | 0.151 | 0.110 | 65,853     | 117,504    | 6,515     |
| PRI024          | KENTUCKY RIVER AT FRANKFORT                      | 5100205 | KY | 38.21286 | -84.8726 | 14,045.3  | 3/13/1979  | 3/23/2006  | 276 | 0.102 | 0.075 | 658,525    | 789,762    | 59,084    |
| PRI025          | KENTUCKY RIVER AT CAMP NELSON                    | 5100205 | KY | 37.76917 | -84.6172 | 11,732.2  | 1/23/1980  | 2/20/1997  | 197 | 0.097 | 0.061 | 563,344    | 552,649    | 60,876    |
| PRI030          | POND CREEK NEAR LOUISVILLE                       | 5140102 | KY | 38.11998 | -85.796  | 166.9     | 1/18/1979  | 4/9/1998   | 221 | 0.935 | 0.638 | 50,465     | 28,866     | 5,999     |
| PRI031          | NORTH FORK KENTUCKY RIVER AT JACKSON             | 5100201 | KY | 37.55111 | -83.3844 | 2,853.8   | 4/19/1984  | 9/19/2006  | 215 | 0.035 | 0.019 | 67,186     | 119,339    | 14,955    |
| PRI034          | SOUTH ELKHORN CREEK NEAR MIDWAY                  | 5100205 | KY | 38.14139 | -84.6453 | 272.0     | 4/12/1984  | 5/19/1999  | 175 | 1.225 | 0.933 | 145,666    | 121,826    | 11,891    |
| PRI043          | LITTLE RIVER NEAR CADIZ                          | 5130205 | KY | 36.84056 | -87.7775 | 697.5     | 10/15/1985 | 12/11/2006 | 207 | 0.140 | 0.110 | 38,445     | 78,240     | 4,724     |
| PRI046          | RED RIVER AT CLAY CITY                           | 5100204 | KY | 37.86528 | -83.9333 | 938.4     | 10/17/1985 | 9/18/2006  | 191 | 0.032 | 0.020 | 15,902     | 25,954     | 3,309     |
| PRI048          | TYGARTS CREEK NEAR LYNN                          | 5090103 | KY | 38.59997 | -82.9524 | 714.8     | 11/14/1985 | 9/12/2006  | 197 | 0.025 | 0.015 | 9,985      | 24,279     | 2,295     |
| PRI049          | LITTLE SANDY RIVER NEAR ARGILLITE                | 5090104 | KY | 38.49056 | -82.8342 | 1,397.8   | 11/14/1985 | 11/14/2006 | 203 | 0.042 | 0.023 | 34,501     | 56,718     | 6,271     |



Table\_S2\_TP

|                 |                                                    |         |    |          |          |           |            |            |     |       |       |           |           |         |
|-----------------|----------------------------------------------------|---------|----|----------|----------|-----------|------------|------------|-----|-------|-------|-----------|-----------|---------|
| PRI051          | HORSE LICK CREEK NEAR LAMERO                       | 5130102 | KY | 37.32012 | -84.1385 | 159.7     | 10/20/1992 | 6/19/2006  | 104 | 0.012 | 0.008 | 1,170     | 4,575     | 387     |
| PRI052          | SALT RIVER NEAR GLENSBORO                          | 5140102 | KY | 38.00222 | -85.0597 | 445.5     | 5/16/1989  | 12/19/2006 | 186 | 0.326 | 0.262 | 84,397    | 51,091    | 7,624   |
| PRI055          | GREEN RIVER NEAR LIVERMORE                         | 5110003 | KY | 37.4782  | -87.1269 | 15,743.0  | 7/10/1991  | 12/12/2006 | 136 | 0.067 | 0.044 | 608,460   | 1,412,708 | 65,339  |
| PRI058          | KENTUCKY RIVER NEAR TRAPP                          | 5100204 | KY | 37.84667 | -84.0811 | 8,383.3   | 1/16/1991  | 11/20/2006 | 139 | 0.024 | 0.016 | 197,339   | 263,223   | 41,392  |
| PRI060          | NORTH FORK LICKING RIVER NEAR MILFORD              | 5100101 | KY | 38.5812  | -84.1656 | 738.5     | 6/11/1991  | 11/30/2006 | 136 | 0.139 | 0.095 | 75,137    | 94,056    | 11,385  |
| PRI061          | LICKING RIVER AT CLAYSVILLE                        | 5100101 | KY | 38.52056 | -84.1833 | 5,097.3   | 1/14/1991  | 11/30/2006 | 83  | 0.072 | 0.044 | 328,062   | 312,846   | 51,313  |
| PRI064          | LEVISA FORK AT LOUISA                              | 5070203 | KY | 38.08056 | -82.6003 | 6,001.1   | 6/26/1991  | 11/16/2006 | 128 | 0.029 | 0.024 | 130,985   | 88,958    | 26,455  |
| PRI067          | KENTUCKY RIVER AT HIGH BRIDGE                      | 5100205 | KY | 37.81914 | -84.7065 | 11,888.7  | 10/30/1997 | 11/20/2006 | 62  | 0.072 | 0.055 | 382,772   | 569,389   | 44,767  |
| PRI069          | RED RIVER NEAR KEYSBURG                            | 5130206 | TN | 36.64081 | -86.9791 | 1,226.3   | 6/10/1998  | 11/20/2006 | 60  | 0.060 | 0.046 | 46,004    | 147,452   | 6,831   |
| PRI077          | RUSSELL CREEK NEAR GRESHAM                         | 5110001 | KY | 37.16781 | -85.4702 | 685.4     | 6/8/1998   | 11/15/2006 | 54  | 0.055 | 0.035 | 28,961    | 71,763    | 8,467   |
| PRI086          | CUMBERLAND RIVER AT CALVIN                         | 5130101 | KY | 36.72214 | -83.6255 | 1,345.6   | 7/23/1998  | 12/13/2006 | 43  | 0.041 | 0.016 |           |           |         |
| PRI087          | CLEAR FORK NEAR WILLIAMSBURG                       | 5130101 | KY | 36.72589 | -84.1424 | 918.6     | 7/8/1998   | 8/18/2004  | 37  | 0.018 | 0.015 |           |           |         |
| PRI092          | GOOSE CREEK NEAR ONEIDA                            | 5100203 | KY | 37.23703 | -83.671  | 663.0     | 6/10/1998  | 9/19/2006  | 41  | 0.029 | 0.023 | 15,691    | 15,185    | 4,367   |
| PRI100          | FLOYDS FORK NEAR SHEPHERDSVILLE                    | 5140102 | KY | 38.035   | -85.6594 | 673.7     | 6/16/1998  | 12/19/2006 | 60  | 0.181 | 0.130 | 84,561    | 65,437    | 16,411  |
| PRI102          | HINKSTON CREEK AT RUDDLES MILLS                    | 5100102 | KY | 38.30461 | -84.2379 | 671.3     | 7/28/1998  | 11/30/2006 | 60  | 0.173 | 0.148 | 55,704    | 82,876    | 8,347   |
| PRI105          | BRASHEARS CREEK AT TAYLORSVILLE                    | 5140102 | KY | 38.03722 | -85.3406 | 672.8     | 8/11/1998  | 12/19/2006 | 54  | 0.281 | 0.213 | 196,088   | 102,249   | 33,180  |
| PRI111          | LICKING RIVER AT BUTLER                            | 5100101 | KY | 38.78969 | -84.3675 | 8,767.4   | 4/20/1999  | 11/30/2006 | 54  | 0.122 | 0.072 | 629,195   | 763,447   | 117,663 |
| R12P02          | KOKOSING R AT TILDEN AVE GAGE - MT. VERNON         | 5040003 | OH | 40.40556 | -82.4997 | 522.3     | 7/16/1987  | 1/17/1997  | 81  | 0.060 | 0.050 | 10,015    | 30,929    | 1,317   |
| RROT--1---10A53 | OTTER TAIL R BRIDGE ON 4TH ST N AT BRECKENRIDGE    | 9020103 | MN | 46.26722 | -96.5897 | 4,417.0   | 10/20/1970 | 11/2/1994  | 239 | 0.146 | 0.130 | 78,051    | 117,802   | 3,826   |
| RRRR296---10E53 | RED RIVER AT ALMONTE AVE S IN GRAND FORKS, ND      | 9020301 | ND | 47.90778 | -97.0256 | 47,603.4  | 10/20/1970 | 11/10/1997 | 242 | 0.378 | 0.311 | 1,317,327 | 1,425,551 | 102,685 |
| RRRR403---10E67 | RED RIVER AT BRIDGE ON CSAH-39, 1 MI W OF PERLEY   | 9020107 | MN | 47.17979 | -96.8247 | 35,883.6  | 10/20/1970 | 11/2/1994  | 237 | 0.515 | 0.450 | 865,139   | 1,070,188 | 75,544  |
| RRRR452---10E71 | RED RIVER BR ON MAIN AVE AT 3RD ST., IN MOORHEAD   | 9020104 | ND | 46.87397 | -96.7763 | 14,792.9  | 7/26/1971  | 9/14/1998  | 245 | 0.211 | 0.180 | 313,006   | 539,306   | 28,724  |
| S000-040        | MINNESOTA RIVER AT MN-19 BRIDGE AT HENDERSON       | 7020012 | MN | 44.52942 | -93.9008 | 38,613.0  | 10/6/1970  | 9/21/2006  | 278 | 0.323 | 0.270 | 1,669,509 | 2,906,750 | 100,542 |
| S000-047        | STRAIGHT R NEAR CSAH-1 1 MI SE OF CLINTON FALLS    | 7040002 | MN | 44.12414 | -93.229  | 654.5     | 8/11/1977  | 9/7/2006   | 190 | 0.341 | 0.289 | 41,365    | 57,064    | 2,367   |
| S000-054        | MINNESOTA R CSAH-24 BRIDGE, 1 MI S OF COURTLAND    | 7020007 | MN | 44.25444 | -94.3414 | 26,385.1  | 10/6/1970  | 9/21/2006  | 271 | 0.285 | 0.272 | 954,609   | 1,619,512 | 49,627  |
| S000-055        | MINNESOTA R BRIDGE ON CSAH-21, 3 MI NE OF DELHI    | 7020004 | MN | 44.6195  | -95.1779 | 18,904.8  | 10/24/2000 | 9/14/2006  | 34  | 0.222 | 0.215 | 285,841   | 927,289   | 24,381  |
| S000-056        | ST. CROIX R AT MN-48 BR, 3.5 MI W OF DANBURY, WI   | 7030001 | MN | 46.01253 | -92.444  | 5,917.6   | 10/23/1970 | 9/20/2007  | 250 | 0.058 | 0.040 | 61,124    | 57,472    | 6,192   |
| S000-095        | MISSISSIPPI R LOCK & DAM #6 AT TREMPLEAU, WIS      | 7040006 | WI | 43.99828 | -91.4391 | 149,360.1 | 10/7/1970  | 9/6/2006   | 189 | 0.192 | 0.178 | 4,710,711 | 7,324,315 | 196,936 |
| S000-111        | OTTER TAIL R BR ON CSAH-15 WEST OF FERGUS FALLS    | 9020103 | MN | 46.27542 | -96.1344 | 4,032.5   | 10/18/1982 | 10/11/2006 | 85  | 0.075 | 0.064 | 35,223    | 61,601    | 1,874   |
| S000-121        | KETTLE R BRIDGE ON MN-48, 4.5 MI E OF HINCKLEY     | 7030003 | MN | 46.01086 | -92.8398 | 2,556.8   | 10/23/1970 | 9/20/2007  | 268 | 0.068 | 0.058 | 43,517    | 50,748    | 3,080   |
| S000-136        | CEDAR RIVER AT CSAH-4, 3 MILES SOUTH OF AUSTIN     | 7080201 | MN | 43.60522 | -92.9845 | 1,230.6   | 10/27/1970 | 9/7/2006   | 262 | 0.636 | 0.517 | 106,254   | 102,061   | 8,325   |
| S000-156        | W FK DES MOINES R CSAH-23 BRIDGE S OF PETERSBURG   | 7100002 | MN | 43.52617 | -94.9192 | 3,291.0   | 10/14/1970 | 9/13/2006  | 200 | 0.320 | 0.280 | 187,464   | 245,396   | 10,696  |
| S000-159        | YELLOW MEDICINE R MN-67 BR 7 MI SE GRANVILLE FALLS | 7020004 | MN | 44.72881 | -95.4438 | 1,616.1   | 10/15/1970 | 9/14/2006  | 204 | 0.160 | 0.116 | 50,505    | 130,919   | 5,724   |
| S000-186        | TWO RIVERS ON US-75, 1 MI N OF HALLOCK             | 9020312 | MN | 48.78925 | -96.9555 | 1,544.0   | 7/27/1971  | 10/12/2006 | 127 | 0.295 | 0.122 | 39,351    | 34,524    | 7,737   |
| S000-268        | ZUMBRO R S FORK AT CSAH-14, 3 MI N OF ROCHESTER    | 7040004 | MN | 44.108   | -92.4475 | 871.4     | 4/6/1981   | 9/6/2006   | 166 | 0.690 | 0.374 | 34,668    | 72,670    | 2,698   |
| S000-287        | MISSISSIPPI R LOCK & DAM #5 3 MI SE OF MINNEISKA   | 7040003 | MN | 44.16011 | -91.8116 | 146,351.0 | 5/21/1974  | 9/6/2006   | 220 | 0.179 | 0.170 | 4,320,441 | 7,226,460 | 191,431 |
| S000-299        | REDWOOD R AT BRIDGE ON CSAH-101 AT N REDWOOD       | 7020006 | MN | 44.56572 | -95.0998 | 1,760.2   | 6/4/1974   | 9/14/2006  | 217 | 0.371 | 0.282 | 96,345    | 196,374   | 7,591   |
| S001-131        | LOST R AT CSAH-5 AT OKLEE                          | 9020305 | MN | 47.84397 | -95.8585 | 570.8     | 5/30/1984  | 7/9/2007   | 96  | 0.110 | 0.058 | 5,236     | 9,709     | 908     |
| S002-088        | THIEF R ON CSAH-7 BRG IN AGASSIZ NWR, 6 MI E OF HO | 9020304 | MN | 48.30045 | -96.0708 | 1,438.5   | 5/30/1984  | 9/11/2007  | 77  | 0.155 | 0.072 | 36,577    | 8,381     | 9,172   |
| S002-118        | CLEARWATER R AT KLONDIKE BRIDGE/BOTTINEAU AVE RED  | 9020305 | MN | 47.88607 | -96.2769 | 3,155.6   | 2/6/1987   | 8/14/2007  | 179 | 0.118 | 0.075 | 56,172    | 51,183    | 6,184   |
| S002-124        | CLEARWATER R AT RD IN T151R42S45W 1 MI N PLUMMER   | 9020305 | MN | 47.9233  | -96.0459 | 1,325.4   | 3/27/1991  | 9/4/2007   | 151 | 0.129 | 0.101 | 21,731    | 24,812    | 1,795   |
| S002-283        | MISSISSIPPI R AT FOREST ROUTE 2171, 9 MI NE OF CAS | 7010101 | MN | 47.44445 | -94.4252 | 2,762.7   | 6/29/1993  | 11/2/2004  | 29  | 0.032 | 0.018 | 11,604    | 17,659    | 1,728   |
| S002-365        | TWO RIVERS, S BR AT US-59 AT LAKE BRONSON          | 9020312 | MN | 48.7326  | -96.6675 | 1,210.3   | 6/24/1991  | 10/22/2002 | 38  | 0.130 | 0.085 | 22,677    | 27,674    | 8,315   |
| S002-963        | RED LK R AT 2ND AVE NE (MURRAY BRIDGE) IN EAST GRA | 9020303 | MN | 47.92372 | -97.016  | 13,535.3  | 10/20/1970 | 8/14/2007  | 334 | 0.142 | 0.108 | 185,102   | 159,310   | 13,592  |
| SL 191          | ST. LOUIS RIVER AT SH-23 BRIDGE                    | 4010201 | MN | 46.65882 | -92.2842 | 9,027.3   | 10/23/1970 | 11/20/1996 | 487 | 0.059 | 0.050 | 132,439   | 116,466   | 4,422   |
| SL 261          | ST. LOUIS R. -N. THOMSON RESERVIOR                 | 4010201 | MN | 46.66417 | -92.4049 | 8,862.7   | 6/4/1974   | 11/20/1996 | 223 | 0.042 | 0.040 | 98,376    | 114,795   | 3,634   |
| SL 303          | ST. LOUIS R. AT SCANLON HYDO DAM                   | 4010201 | MN | 46.70969 | -92.4201 | 8,661.6   | 1/29/1974  | 11/20/1996 | 246 | 0.045 | 0.039 | 102,673   | 110,661   | 4,693   |
| SL 500          | ST. LOUIS RIVER AT COUNTY RD. 31                   | 4010201 | MN | 46.86972 | -92.6028 | 6,014.7   | 6/4/1974   | 11/20/1996 | 215 | 0.056 | 0.050 | 86,858    | 86,740    | 3,659   |
| SR01            | Scioto River at Lucasville, OH                     | 5060002 | OH | 38.88111 | -83.0175 | 15,984.7  | 9/7/1976   | 7/11/2006  | 251 | 0.335 | 0.260 | 1,051,628 | 1,260,216 | 114,954 |
| UMI050-0006     | Iroquois River                                     | 7120002 | IN | 40.82028 | -87.4642 | 1,411.1   | 3/16/1999  | 2/15/2006  | 75  | 0.125 | 0.119 | 52,635    | 53,450    | 3,970   |
| UMK030-0002     | Kankakee River                                     | 7120001 | IN | 41.47722 | -86.6044 | 966.5     | 2/21/1978  | 11/30/2000 | 248 | 0.098 | 0.050 | 18,306    | 74,898    | 2,065   |
| UMK030-0020     | Kankakee River                                     | 7120001 | IN | 41.46139 | -86.6139 | 980.3     | 1/25/2001  | 2/15/2006  | 62  | 0.039 | 0.031 | 13,585    | 77,024    | 852     |
| UMK060-0001     | Yellow River                                       | 7120001 | IN | 41.3025  | -86.6014 | 1,063.8   | 3/16/1999  | 2/15/2006  | 82  | 0.106 | 0.090 | 51,190    | 45,182    | 3,479   |
| UMK080-0001     | Kankakee River                                     | 7120001 | IN | 41.21974 | -86.9687 | 3,441.1   | 3/16/1999  | 2/15/2006  | 81  | 0.076 | 0.060 | 111,361   | 156,302   | 5,819   |
| UMK090-0001     | Crooked Cr                                         | 7120001 | IN | 41.28222 | -87.0258 | 224.8     | 3/16/1999  | 2/15/2006  | 78  | 0.050 | 0.040 | 4,560     | 4,894     | 586     |
| V02P16          | SCIOTO R. AT WARRENSBURG - OSTRANDER RD.           | 5060001 | OH | 40.30583 | -83.1681 | 1,968.4   | 9/4/1979   | 10/2/1995  | 29  | 0.168 | 0.160 | 131,951   | 165,981   | 17,370  |
| WAE050-0001     | Eel River                                          | 5120104 | IN | 40.94806 | -85.8911 | 1,284.0   | 1/16/1985  | 2/22/2006  | 239 | 0.181 | 0.120 | 124,995   | 75,967    | 10,219  |
| WAW010-0063     | Wildcat Cr                                         | 5120107 | IN | 40.48611 | -86.1075 | 509.4     | 2/21/1974  | 2/14/2006  | 406 | 0.111 | 0.090 | 23,692    | 21,244    | 1,649   |
| WAW020-0004     | Wildcat Cr                                         | 5120107 | IN | 40.47361 | -86.1842 | 646.7     | 1/25/1973  | 2/14/2006  | 443 | 0.312 | 0.170 | 54,170    | 44,307    | 4,810   |
| WAW020-0039     | Wildcat Cr                                         | 5120107 | IN | 40.48167 | -86.53   | 981.2     | 9/23/1998  | 2/22/2006  | 89  | 0.170 | 0.150 | 58,218    | 70,261    | 5,304   |

Table\_S2\_TP

|             |                           |         |    |          |          |          |            |            |     |       |       |           |           |         |
|-------------|---------------------------|---------|----|----------|----------|----------|------------|------------|-----|-------|-------|-----------|-----------|---------|
| WAW050-0005 | Wildcat Cr                | 5120107 | IN | 40.45361 | -86.8514 | 2,077.1  | 3/13/1980  | 2/22/2006  | 151 | 0.136 | 0.120 | 139,113   | 206,562   | 14,378  |
| WBU100-0001 | Wabash River              | 5120111 | IN | 39.22722 | -87.5742 | 33,226.7 | 1/4/1978   | 2/1/2006   | 319 | 0.232 | 0.200 | 2,823,620 | 2,355,982 | 131,684 |
| WBU160-0002 | Busseron Cr               | 5120111 | IN | 38.97389 | -87.4258 | 591.6    | 3/10/1999  | 11/12/2003 | 65  | 0.171 | 0.150 | 34,221    | 37,760    | 4,266   |
| WBU200-0003 | Wabash River              | 5120111 | IN | 38.68125 | -87.5347 | 35,672.3 | 1/10/1990  | 2/13/2006  | 185 | 0.205 | 0.190 | 3,116,916 | 2,522,723 | 164,015 |
| WDE010-0007 | Wabash River              | 5120105 | IN | 40.73667 | -86.505  | 9,981.3  | 2/1/1971   | 2/22/2006  | 349 | 0.290 | 0.180 | 1,067,974 | 840,646   | 86,195  |
| WDE060-0001 | Wabash River              | 5120105 | IN | 40.52861 | -86.7603 | 11,496.6 | 2/21/2001  | 2/22/2006  | 61  | 0.216 | 0.180 | 1,153,958 | 954,380   | 88,943  |
| WDE070-0006 | Wabash River              | 5120105 | IN | 40.49556 | -86.8233 | 16,696.8 | 1/22/1991  | 12/5/2000  | 112 | 0.168 | 0.145 | 1,383,464 | 1,154,712 | 95,377  |
| WED010-0005 | Big Blue River            | 5120204 | IN | 39.87361 | -85.4389 | 149.4    | 1/24/1991  | 9/23/2003  | 95  | 0.147 | 0.130 | 11,208    | 17,557    | 1,194   |
| WED050-0001 | Big Blue River            | 5120204 | IN | 39.355   | -85.9839 | 1,511.6  | 1/17/1973  | 2/9/2006   | 242 | 0.169 | 0.140 | 102,066   | 94,956    | 7,608   |
| WEF050-0002 | Flatrock River            | 5120205 | IN | 39.36361 | -85.8553 | 1,056.8  | 4/15/1999  | 3/2/2006   | 84  | 0.063 | 0.050 | 61,476    | 77,272    | 12,825  |
| WEF060-0003 | E Fk White River          | 5120205 | IN | 39.20028 | -85.9264 | 4,070.1  | 1/21/1986  | 2/8/2006   | 247 | 0.113 | 0.080 | 254,824   | 281,172   | 22,681  |
| WEL040-0003 | E Fk White River          | 5120208 | IN | 38.82583 | -86.5133 | 10,459.6 | 2/13/1974  | 2/21/2006  | 356 | 0.138 | 0.100 | 876,777   | 758,900   | 56,984  |
| WEL100-0002 | E Fk White River          | 5120208 | IN | 38.80194 | -86.645  | 12,221.4 | 2/16/1971  | 2/21/2006  | 398 | 0.153 | 0.100 | 709,317   | 820,994   | 46,979  |
| WEL170-0001 | E Fk White River          | 5120208 | IN | 38.53917 | -87.2231 | 14,877.0 | 1/15/1980  | 2/28/2006  | 309 | 0.176 | 0.110 | 1,222,911 | 1,021,884 | 100,077 |
| WEM070-0001 | Vernon Fk Muscatatuck Riv | 5120207 | IN | 38.97639 | -85.62   | 516.4    | 7/9/1998   | 3/1/2006   | 106 | 0.165 | 0.125 | 30,811    | 57,221    | 3,385   |
| WEU040-0001 | E Fk White River          | 5120206 | IN | 38.98722 | -85.8989 | 6,043.9  | 3/12/1971  | 2/9/2006   | 418 | 0.175 | 0.110 | 501,085   | 447,200   | 39,429  |
| WLW030-0003 | Wabash River              | 5120108 | IN | 40.41194 | -87.0364 | 19,508.1 | 1/24/1973  | 2/2/2006   | 382 | 0.285 | 0.200 | 1,741,532 | 1,494,861 | 98,738  |
| WLW080-0003 | Wabash River              | 5120108 | IN | 40.255   | -87.2997 | 21,085.4 | 3/15/1999  | 2/2/2006   | 81  | 0.221 | 0.220 | 1,743,644 | 1,557,835 | 78,158  |
| WLW140-0001 | Wabash River              | 5120108 | IN | 39.95167 | -87.4192 | 25,311.8 | 2/26/1974  | 2/1/2006   | 361 | 0.220 | 0.200 | 2,122,153 | 1,874,089 | 89,038  |
| WLW150-0001 | Wabash River              | 5120108 | IN | 39.79222 | -87.3744 | 28,903.1 | 2/9/1971   | 2/1/2006   | 373 | 0.227 | 0.190 | 2,333,000 | 2,100,950 | 105,811 |
| WLW160-0001 | Big Raccoon Cr            | 5120108 | IN | 39.79028 | -86.9586 | 456.5    | 3/29/1999  | 2/1/2006   | 82  | 0.069 | 0.040 | 16,597    | 35,710    | 3,063   |
| WLW190-0012 | Big Raccoon Cr            | 5120108 | IN | 39.72917 | -87.325  | 1,229.2  | 4/28/1999  | 2/1/2006   | 82  | 0.077 | 0.060 | 60,900    | 67,072    | 5,132   |
| WLW200-0001 | Wabash River              | 5120108 | IN | 39.65639 | -87.3956 | 30,428.1 | 4/22/1976  | 2/1/2006   | 337 | 0.228 | 0.190 | 2,439,284 | 2,179,248 | 115,779 |
| WMI060-0004 | Mississinewa River        | 5120103 | IN | 40.62806 | -85.7358 | 1,838.7  | 3/9/1971   | 2/14/2006  | 415 | 0.284 | 0.190 | 148,398   | 144,589   | 12,700  |
| WMI060-0005 | Mississinewa River        | 5120103 | IN | 40.57611 | -85.6597 | 1,751.4  | 2/17/1971  | 2/14/2006  | 379 | 0.193 | 0.160 | 147,450   | 130,398   | 10,523  |
| WMI060-0006 | Mississinewa River        | 5120103 | IN | 40.74917 | -86.0119 | 2,103.8  | 1/22/1991  | 2/22/2006  | 175 | 0.132 | 0.100 | 241,243   | 159,001   | 33,434  |
| WPA040-0003 | Patoka River              | 5120209 | IN | 38.32972 | -86.9664 | 1,126.3  | 2/16/1971  | 2/27/2006  | 256 | 0.254 | 0.200 | 122,157   | 119,124   | 9,769   |
| WPA060-0002 | Patoka River              | 5120209 | IN | 38.3825  | -87.3333 | 1,688.0  | 1/17/1973  | 2/27/2006  | 161 | 0.179 | 0.150 | 244,608   | 183,445   | 15,145  |
| WQN0001     | GENESEE RIVER             | 4130002 | PA | 41.9942  | -77.8703 | 222.1    | 3/21/1990  | 12/1/1998  | 36  | 0.034 | 0.030 | 3,980     | 9,884     | 655     |
| WQN0643     | CONNEAUT CREEK            | 4120101 | PA | 41.918   | -80.4692 | 398.2    | 1/19/1988  | 12/2/1998  | 129 | 0.053 | 0.040 | 16,670    | 17,881    | 1,665   |
| WQN0702     | MONONGAHELA RIVER         | 5020005 | PA | 40.1519  | -79.9042 | 13,502.5 | 10/8/1970  | 12/7/1998  | 271 | 0.073 | 0.040 | 348,682   | 396,458   | 50,275  |
| WQN0726     | CASSELLMAN RIVER          | 5020006 | PA | 39.7325  | -79.1009 | 193.7    | 1/26/1988  | 12/2/1998  | 129 | 0.045 | 0.032 | 5,653     | 3,686     | 578     |
| WQN0801     | ALLEGHENY RIVER           | 5010009 | PA | 40.52745 | -79.846  | 29,846.8 | 10/5/1971  | 12/16/1998 | 138 | 0.064 | 0.040 | 768,221   | 849,126   | 128,917 |
| WQN0802     | ALLEGHENY RIVER           | 5010006 | PA | 40.7611  | -79.5458 | 23,274.4 | 1/4/1971   | 12/16/1998 | 275 | 0.065 | 0.040 | 639,046   | 618,257   | 82,788  |
| WQN0807     | ALLEGHENY RIVER           | 5010001 | PA | 41.965   | -78.3861 | 1,422.6  | 12/21/1970 | 12/2/1998  | 280 | 0.071 | 0.040 | 24,442    | 24,852    | 2,862   |
| WQN0843     | CLARION RIVER             | 5010005 | PA | 41.1296  | -79.5548 | 3,003.1  | 3/1/1973   | 12/7/1998  | 291 | 0.030 | 0.020 | 47,638    | 69,720    | 8,047   |
| WQN0845     | FRENCH CREEK              | 5010004 | PA | 41.402   | -79.8316 | 3,187.4  | 2/20/1973  | 12/3/1998  | 204 | 0.057 | 0.050 | 96,525    | 108,248   | 7,851   |
| WQN0846     | FRENCH CREEK              | 5010004 | PA | 41.5893  | -80.1502 | 2,094.4  | 10/11/1988 | 12/1/1998  | 124 | 0.078 | 0.068 | 99,496    | 73,045    | 6,464   |
| WQN0861     | MAHONING CREEK            | 5010006 | PA | 40.9221  | -79.0064 | 411.4    | 1/21/1988  | 12/7/1998  | 130 | 0.064 | 0.040 | 11,515    | 12,103    | 1,048   |
| WQN0867     | ALLEGHENY RIVER           | 5010003 | PA | 41.2638  | -79.8415 | 16,226.1 | 1/20/1988  | 12/3/1998  | 130 | 0.042 | 0.040 | 496,009   | 441,054   | 36,544  |
| WQN0869     | FRENCH CREEK              | 5010004 | PA | 41.7717  | -80.1076 | 1,542.2  | 12/13/1994 | 12/2/1998  | 49  | 0.041 | 0.034 | 46,383    | 48,615    | 5,993   |
| WQN0901     | OHIO RIVER                | 5030101 | OH | 40.62058 | -80.5589 | 60,905.2 | 10/5/1971  | 12/15/1998 | 263 | 0.099 | 0.080 | 2,336,723 | 2,487,939 | 235,451 |
| WQN0902     | OHIO RIVER                | 5030101 | PA | 40.533   | -80.1881 | 50,462.4 | 2/10/1976  | 12/14/1998 | 256 | 0.111 | 0.080 | 3,048,111 | 1,773,835 | 170,574 |
| WSA020-0002 | Salamonie River           | 5120102 | IN | 40.55917 | -85.2786 | 657.7    | 7/28/1998  | 2/13/2006  | 84  | 0.196 | 0.140 | 85,007    | 85,269    | 7,737   |
| WSA040-0001 | Salamonie River           | 5120102 | IN | 40.82972 | -85.7189 | 1,452.7  | 2/17/1971  | 2/22/2006  | 372 | 0.147 | 0.100 | 141,669   | 125,100   | 14,391  |
| WSA040-0005 | Salamonie River           | 5120102 | IN | 40.74167 | -85.5089 | 1,154.5  | 10/4/1971  | 2/13/2006  | 257 | 0.199 | 0.150 | 198,871   | 117,890   | 28,037  |
| WSU020-0003 | Sugar Cr                  | 5120110 | IN | 40.14333 | -86.6958 | 749.7    | 3/15/1999  | 2/2/2006   | 81  | 0.140 | 0.110 | 34,332    | 59,827    | 4,987   |
| WSU050-0002 | Sugar Cr                  | 5120110 | IN | 40.05    | -86.9225 | 1,338.7  | 3/15/1999  | 2/2/2006   | 83  | 0.218 | 0.160 | 68,307    | 107,280   | 7,746   |
| WSU050-0005 | Sugar Cr                  | 5120110 | IN | 39.94611 | -87.0586 | 1,721.4  | 1/24/1973  | 2/1/2006   | 378 | 0.146 | 0.100 | 81,958    | 129,242   | 8,188   |
| WTI050-0009 | Tippecanoe River          | 5120106 | IN | 41.09417 | -86.2403 | 1,629.7  | 3/6/1991   | 2/8/2006   | 169 | 0.135 | 0.120 | 87,319    | 73,028    | 5,332   |
| WTI080-0001 | Tippecanoe River          | 5120106 | IN | 41.00667 | -86.6028 | 2,695.6  | 3/25/1998  | 2/15/2006  | 94  | 0.087 | 0.080 | 101,846   | 115,770   | 5,608   |
| WTI150-0011 | Tippecanoe River          | 5120106 | IN | 40.59389 | -86.7708 | 4,868.3  | 10/1/1986  | 2/22/2006  | 227 | 0.113 | 0.080 | 137,802   | 175,930   | 9,645   |
| WUW060-0002 | Wabash River              | 5120101 | IN | 40.61667 | -84.965  | 1,233.8  | 1/8/1991   | 12/2/2002  | 133 | 0.434 | 0.370 | 248,245   | 204,590   | 25,904  |
| WUW070-0002 | Wabash River              | 5120101 | IN | 40.81944 | -85.3425 | 1,661.0  | 1/10/1991  | 1/21/2003  | 135 | 0.310 | 0.300 | 191,353   | 238,169   | 15,405  |
| WUW090-0001 | Wabash River              | 5120101 | IN | 40.85833 | -85.5075 | 2,000.7  | 1/10/1991  | 1/21/2003  | 140 | 0.235 | 0.200 | 219,679   | 251,551   | 18,052  |
| WUW120-0002 | Little River              | 5120101 | IN | 40.89861 | -85.4133 | 702.6    | 2/25/1998  | 2/6/2006   | 91  | 0.239 | 0.205 | 63,165    | 43,048    | 6,560   |
| WUW140-0001 | Wabash River              | 5120101 | IN | 40.86889 | -85.6019 | 2,987.6  | 2/23/1977  | 1/21/2003  | 285 | 0.308 | 0.260 | 286,367   | 317,000   | 18,951  |
| WUW160-0006 | Wabash River              | 5120101 | IN | 40.74222 | -86.0967 | 7,083.3  | 1/12/1971  | 2/22/2006  | 405 | 0.241 | 0.180 | 682,602   | 648,096   | 45,315  |
| WUW170-0002 | Pipe Cr                   | 5120101 | IN | 40.72167 | -86.1983 | 452.3    | 3/25/1998  | 9/9/2003   | 63  | 0.134 | 0.100 | 23,485    | 39,052    | 4,274   |
| WVE100-0001 | Vermillion River          | 5120109 | IN | 39.96139 | -87.4519 | 3,705.7  | 2/26/1974  | 2/1/2006   | 364 | 0.400 | 0.290 | 225,133   | 297,127   | 12,561  |

Table\_S2\_TP

|             |                                               |         |    |          |          |          |           |           |     |       |       |           |           |         |
|-------------|-----------------------------------------------|---------|----|----------|----------|----------|-----------|-----------|-----|-------|-------|-----------|-----------|---------|
| WWE060-0004 | Mill Cr                                       | 5120203 | IN | 39.63667 | -86.6406 | 144.4    | 10/1/1974 | 9/24/2003 | 231 | 0.072 | 0.040 | 3,249     | 10,261    | 464     |
| WWE080-0001 | Eel River                                     | 5120203 | IN | 39.35056 | -87.0725 | 2,256.0  | 2/29/1996 | 2/1/2006  | 89  | 0.097 | 0.075 | 152,001   | 133,293   | 12,823  |
| WWE090-0001 | Eel River                                     | 5120203 | IN | 39.12423 | -86.9702 | 3,124.8  | 1/22/1986 | 2/14/2006 | 136 | 0.152 | 0.110 | 252,990   | 190,426   | 24,133  |
| WWL020-0003 | W Fk White River                              | 5120202 | IN | 39.28028 | -86.7619 | 7,765.8  | 1/28/1991 | 2/14/2006 | 171 | 0.358 | 0.290 | 851,305   | 828,632   | 53,542  |
| WWL030-0003 | W Fk White River                              | 5120202 | IN | 39.11194 | -86.9625 | 11,405.4 | 2/29/1996 | 2/14/2006 | 89  | 0.292 | 0.270 | 1,162,133 | 1,035,477 | 67,233  |
| WWL070-0003 | W Fk White River                              | 5120202 | IN | 38.795   | -87.2417 | 12,919.1 | 1/28/1991 | 2/13/2006 | 181 | 0.238 | 0.220 | 1,322,943 | 1,144,024 | 72,074  |
| WWL100-0005 | White River                                   | 5120202 | IN | 38.51167 | -87.2886 | 28,823.8 | 2/16/1971 | 2/28/2006 | 401 | 0.257 | 0.190 | 2,338,980 | 2,285,520 | 141,593 |
| WWU010-0001 | W Fk White River                              | 5120201 | IN | 40.17833 | -85.3422 | 581.5    | 1/17/1973 | 2/15/2006 | 377 | 0.133 | 0.100 | 39,899    | 28,936    | 3,327   |
| WWU010-0006 | W Fk White River                              | 5120201 | IN | 40.18222 | -84.9689 | 88.4     | 4/13/1978 | 9/23/2003 | 284 | 0.119 | 0.090 | 5,095     | 4,111     | 598     |
| WWU020-0005 | W Fk White River                              | 5120201 | IN | 40.17889 | -85.495  | 655.3    | 3/11/1971 | 2/15/2006 | 397 | 0.556 | 0.240 | 69,999    | 59,989    | 7,387   |
| WWU030-0003 | W Fk White River                              | 5120201 | IN | 40.10667 | -85.6728 | 1,059.2  | 3/11/1971 | 2/15/2006 | 397 | 0.323 | 0.190 | 82,608    | 77,459    | 8,237   |
| WWU040-0004 | W Fk White River                              | 5120201 | IN | 40.14222 | -85.8628 | 1,480.1  | 1/7/1991  | 2/13/2006 | 183 | 0.291 | 0.260 | 151,696   | 116,993   | 9,626   |
| WWU090-0002 | W Fk White River                              | 5120201 | IN | 39.91    | -86.105  | 3,182.6  | 7/21/1971 | 2/15/2006 | 390 | 0.318 | 0.240 | 284,298   | 216,588   | 15,473  |
| WWU110-0001 | Fall Cr                                       | 5120201 | IN | 39.78194 | -86.1767 | 861.3    | 1/23/1986 | 2/15/2006 | 237 | 0.173 | 0.110 | 34,285    | 47,464    | 3,255   |
| WWU110-0002 | Fall Cr                                       | 5120201 | IN | 39.83444 | -86.1219 | 803.5    | 1/21/1971 | 2/15/2006 | 387 | 0.122 | 0.080 | 21,653    | 36,735    | 1,577   |
| WWU120-0001 | Eagle Cr                                      | 5120201 | IN | 39.735   | -86.1967 | 539.3    | 2/8/1971  | 2/15/2006 | 398 | 0.278 | 0.167 | 14,097    | 38,774    | 1,258   |
| WWU120-0002 | Eagle Cr                                      | 5120201 | IN | 39.77833 | -86.2506 | 449.2    | 1/23/1986 | 2/15/2006 | 240 | 0.074 | 0.040 | 16,083    | 27,073    | 2,053   |
| WWU140-0003 | W Fk White River                              | 5120201 | IN | 39.56694 | -86.2558 | 5,259.9  | 10/6/1992 | 2/21/2006 | 164 | 0.496 | 0.402 | 614,140   | 536,031   | 41,868  |
| WWU150-0007 | White Lick Cr                                 | 5120201 | IN | 39.51361 | -86.3803 | 746.8    | 2/22/1996 | 2/21/2006 | 90  | 0.184 | 0.160 | 41,699    | 211,773   | 2,675   |
| WWU160-0004 | W Fk White River                              | 5120201 | IN | 39.43389 | -86.4494 | 6,462.6  | 1/17/1973 | 2/21/2006 | 307 | 0.599 | 0.380 | 671,899   | 775,396   | 36,986  |
| YOU0925     | YOUGH. R. GA. 0.7M. UPST.FR.BR.ON RT 42 AT FD | 5020006 | MD | 39.65335 | -79.4079 | 763.6    | 10/9/1973 | 12/5/1995 | 159 | 0.078 | 0.030 | 35,522    | 13,262    | 4,856   |
| YOU1139     | YOUGH. R. N OF RT 20 BR.DOWNST.FR. LT. YOUGH. | 5020006 | MD | 39.42472 | -79.4208 | 349.7    | 3/27/1974 | 12/5/1995 | 178 | 0.094 | 0.053 | 21,707    | 7,819     | 2,655   |

Table\_S2\_TN

Table S2\_TN. Summary of measured (with Fluxmaster) and estimated (with SPARROW) loads for each monitoring site used in the calibration of the SPARROW models, with a summary of the measured loads. [Not all water-water quality used in Fluxmaster calculations if outside of year range specified in Table S1.]

Supplemental Material to Robertson and Saad, 2011, *Journal of the American Water Resources Association, Nutrient Inputs to the Laurentian Great Lakes By Source and River Basin Estimated Using SPARROW Watershed Models.*

[kg, kilogram; km<sup>2</sup>, square kilometer; mg/L, milligrams per liter; kg/yr, kilograms per year]

HUC8's are based on Seaber, P.R., F.P. Kapinos, and G.L. Knapp, 1987. Hydrologic Unit maps: U.S. Geol. Surv. Water-Supply Paper 2294, 63 p. Available online at: <http://water.usgs.gov/GIS/huc.html>

| Identification and Location Information |                                                  |         |       |                    |                     |                         | Total Nitrogen Concentration and Load Data |                        |                        |                        |                          |                         |                                |                                                |
|-----------------------------------------|--------------------------------------------------|---------|-------|--------------------|---------------------|-------------------------|--------------------------------------------|------------------------|------------------------|------------------------|--------------------------|-------------------------|--------------------------------|------------------------------------------------|
| Station Identification                  |                                                  | HUC8    | State | Latitude (decimal) | Longitude (decimal) | Area (km <sup>2</sup> ) | Water                                      |                        | Number of Observations | Midmonthly Mean (mg/L) | Midmonthly Median (mg/L) | Fluxmaster Load (kg/yr) | SPARROW Estimated Load (kg/yr) | Standard Deviation in Fluxmaster Loads (kg/yr) |
| Number                                  | Name                                             |         |       |                    |                     |                         | Quality Start Date                         | Water Quality End Date |                        |                        |                          |                         |                                |                                                |
| 000755                                  | CUMBERLAND R 262.9 @ HWY 231 QUAD 313SE          | 5130201 | TN    | 36.29917           | -86.2631            | 28,282.3                | 11/7/1977                                  | 12/7/1998              | 114                    | 0.765                  | 0.660                    | 11,771,812              | 21,014,782                     | 669,115                                        |
| 000770                                  | CUMBERLAND R 174.5 U/S FROM CLEESE'S FERRY       | 5130202 | TN    | 36.14842           | -86.8902            | 33,040.0                | 9/10/1973                                  | 10/22/1998             | 154                    | 1.143                  | 0.885                    | 10,696,136              | 26,534,388                     | 1,689,770                                      |
| 002205                                  | RED RIVER 8.4 QUAD 301SE                         | 5130206 | TN    | 36.52833           | -87.2783            | 2,352.1                 | 7/29/1982                                  | 7/8/1998               | 34                     | 3.518                  | 3.465                    | 4,553,358               | 4,610,581                      | 418,109                                        |
| 010                                     | MISSISSIPPI R BR ON CR-441 1 MI SW OF BLACKBERRY | 7010103 | MN    | 47.17447           | -93.4206            | 9,310.1                 | 5/16/1974                                  | 9/27/1994              | 147                    | 0.865                  | 0.823                    | 1,180,237               | 579,178                        | 33,131                                         |
| 018                                     | KNIFE RIVER UPSTREAM OF US-61 AT KNIFE RIVER     | 4010102 | MN    | 46.94698           | -91.7951            | 225.8                   | 7/10/1974                                  | 9/22/1993              | 59                     | 0.668                  | 0.650                    | 68,867                  | 51,963                         | 7,817                                          |
| 020051                                  | DRUMMOND BOG DISCHARGE 1MI NE DRUMMOND,WI        | 4010302 | WI    | 46.34888           | -91.2584            | 88.9                    | 10/4/1989                                  | 9/18/1997              | 89                     | 1.146                  | 0.995                    | 34,776                  | 13,062                         | 3,499                                          |
| 03011800                                | Kinzua Creek near Guffey, PA                     | 5010001 | PA    | 41.76673           | -78.7187            | 100.5                   | 8/16/1995                                  | 8/16/1995              | 1                      | 0.330                  | 0.330                    |                         |                                |                                                |
| 03012600                                | Allegheny River at Warren, PA                    | 5010001 | PA    | 41.8245            | -79.1189            | 5,757.6                 | 4/15/2002                                  | 9/7/2005               | 20                     | 0.706                  | 0.590                    |                         |                                |                                                |
| 03015000                                | Conewango Creek at Russell, PA                   | 5010002 | PA    | 41.93811           | -79.1331            | 2,113.4                 | 4/15/2002                                  | 9/7/2005               | 21                     | 1.011                  | 1.000                    |                         |                                |                                                |
| 03015500                                | Brokenstraw Creek at Youngsville, PA             | 5010001 | PA    | 41.85447           | -79.3164            | 831.4                   | 4/16/2002                                  | 9/7/2005               | 20                     | 0.905                  | 0.920                    |                         |                                |                                                |
| 03016000                                | Allegheny River at West Hickory, PA              | 5010003 | PA    | 41.56971           | -79.4056            | 9,479.4                 | 10/25/1978                                 | 9/6/2005               | 115                    | 1.065                  | 0.905                    | 4,124,793               | 5,825,335                      | 381,097                                        |
| 03020500                                | Oil Creek at Rouseville, PA                      | 5010003 | PA    | 41.48096           | -79.6953            | 777.0                   | 4/24/2002                                  | 9/21/2005              | 20                     | 0.527                  | 0.520                    |                         |                                |                                                |
| 03024000                                | French Creek at Utica, PA                        | 5010004 | PA    | 41.43792           | -79.9554            | 2,662.5                 | 4/18/1996                                  | 11/20/2002             | 33                     | 0.948                  | 0.927                    | 2,309,465               | 2,470,188                      | 301,840                                        |
| 03029500                                | Clarion River at Cooksburg, PA                   | 5010005 | PA    | 41.3314            | -79.209             | 2,090.1                 | 4/16/2002                                  | 9/6/2005               | 19                     | 0.408                  | 0.400                    |                         |                                |                                                |
| 03031500                                | Allegheny River at Parker, PA                    | 5010006 | PA    | 41.10086           | -79.6794            | 19,867.9                | 3/1/1982                                   | 1/26/2005              | 30                     | 0.619                  | 0.590                    | 8,925,531               | 12,800,054                     | 1,036,063                                      |
| 03032500                                | Redbank Creek at St. Charles, PA                 | 5010006 | PA    | 40.99482           | -79.3952            | 1,367.5                 | 6/19/2002                                  | 9/22/2005              | 19                     | 0.711                  | 0.660                    |                         |                                |                                                |
| 03040000                                | Stonycreek River at Ferndale, PA                 | 5010007 | PA    | 40.28592           | -78.9203            | 1,168.1                 | 4/23/1996                                  | 9/28/1998              | 36                     | 1.064                  | 1.045                    | 728,852                 | 936,880                        | 32,554                                         |
| 03042000                                | Blacklick Creek at Josephine, PA                 | 5010007 | PA    | 40.47345           | -79.1834            | 497.3                   |                                            |                        |                        |                        |                          |                         |                                |                                                |
| 03044000                                | Conemaugh River at Tunnelton, PA                 | 5010007 | PA    | 40.45451           | -79.3909            | 3,517.2                 | 4/10/2002                                  | 9/28/2005              | 21                     | 1.364                  | 1.240                    |                         |                                |                                                |
| 03049625                                | Allegheny River at New Kensington, PA            | 5010009 | PA    | 40.56451           | -79.7726            | 29,904.1                | 9/24/1973                                  | 8/10/2004              | 202                    | 1.026                  | 0.952                    | 16,847,320              | 19,780,306                     | 633,101                                        |
| 03050000                                | TYGART VALLEY RIVER NEAR DAILEY, WV              | 5020001 | WV    | 38.80901           | -79.8822            | 479.2                   | 6/18/1974                                  | 4/19/1995              | 84                     | 0.785                  | 0.740                    | 238,491                 | 296,031                        | 16,123                                         |
| 03061000                                | WEST FORK RIVER AT ENTERPRISE, WV                | 5020002 | WV    | 39.42209           | -80.2759            | 1,965.8                 | 7/16/1974                                  | 9/16/2004              | 278                    | 1.001                  | 0.925                    | 952,167                 | 1,056,294                      | 69,220                                         |
| 03063000                                | Monongahela R at Lock & Dam 8, at Pnt Marion, PA | 5020003 | PA    | 39.72702           | -79.9115            | 7,044.8                 | 6/17/1971                                  | 9/26/2005              | 24                     | 0.896                  | 0.900                    |                         |                                |                                                |
| 03072000                                | Dunkard Creek at Shannopin, PA                   | 5020005 | PA    | 39.75916           | -79.9703            | 593.1                   | 4/30/1996                                  | 9/26/2005              | 54                     | 0.645                  | 0.600                    | 199,197                 | 257,449                        | 21,684                                         |
| 03077500                                | Youghiogheny River at Youghiogheny River Dam, PA | 5020006 | PA    | 39.80567           | -79.3647            | 1,129.2                 | 4/29/2002                                  | 9/27/2005              | 21                     | 0.919                  | 0.900                    |                         |                                |                                                |
| 03079000                                | Casselman River at Markleton, PA                 | 5020006 | PA    | 39.85987           | -79.2283            | 989.4                   | 8/17/1995                                  | 8/17/1995              | 1                      | 0.810                  | 0.810                    |                         |                                |                                                |
| 03083250                                | Sewickley Creek at Hunker, PA                    | 5020006 | PA    | 40.20642           | -79.623             | 230.0                   |                                            |                        |                        |                        |                          |                         |                                |                                                |
| 03083500                                | Youghiogheny River at Sutersville, PA            | 5020006 | PA    | 40.24003           | -79.8063            | 4,441.9                 | 11/1/1979                                  | 9/14/2005              | 72                     | 1.196                  | 1.080                    | 3,499,933               | 3,250,147                      | 204,514                                        |
| 03085000                                | Monongahela River at Braddock, PA                | 5020005 | PA    | 40.39043           | -79.8586            | 19,002.8                | 2/13/1973                                  | 8/10/2004              | 221                    | 1.515                  | 1.300                    | 13,422,539              | 11,631,783                     | 684,072                                        |
| 03086000                                | Ohio River at Sewickley, PA                      | 5030101 | PA    | 40.55023           | -80.204             | 50,505.0                | 9/26/1973                                  | 9/1/2005               | 80                     | 1.285                  | 1.158                    | 38,401,696              | 36,125,444                     | 1,146,897                                      |
| 03099500                                | Mahoning River at Lowellville OH                 | 5030103 | OH    | 41.03598           | -80.5368            | 2,779.1                 | 10/26/1987                                 | 10/7/2000              | 143                    | 3.289                  | 2.980                    | 2,325,354               | 2,905,490                      | 123,856                                        |
| 03099600                                | Mahoning River at North Edinburg, PA             | 5030103 | PA    | 41.01839           | -80.4406            | 2,846.4                 | 6/29/1994                                  | 9/13/2005              | 27                     | 2.271                  | 2.280                    | 2,758,768               | 2,964,118                      | 125,291                                        |
| 03103500                                | Shenango River at Sharpsville, PA                | 5030102 | PA    | 41.26617           | -80.4726            | 1,512.6                 | 10/18/1978                                 | 9/19/2005              | 115                    | 1.865                  | 1.218                    | 1,182,326               | 823,755                        | 177,555                                        |
| 03105500                                | Beaver River at Wampum, PA                       | 5030104 | PA    | 40.88894           | -80.3366            | 5,788.7                 | 4/22/1977                                  | 9/15/2003              | 45                     | 2.308                  | 2.120                    | 4,467,841               | 5,213,738                      | 554,441                                        |
| 03106000                                | Connoquenessing Creek near Zellenople, PA        | 5030105 | PA    | 40.81673           | -80.2426            | 922.0                   | 4/17/2002                                  | 9/1/2005               | 20                     | 1.861                  | 1.820                    |                         |                                |                                                |
| 03106500                                | Slippery Rock Creek at Wurttemberg, PA           | 5030105 | PA    | 40.88412           | -80.2338            | 1,030.8                 | 4/17/2002                                  | 9/1/2005               | 21                     | 0.931                  | 0.880                    |                         |                                |                                                |
| 03107500                                | Beaver River at Beaver Falls, PA                 | 5030104 | PA    | 40.76298           | -80.3159            | 8,044.5                 | 7/1/1976                                   | 9/13/2007              | 380                    | 2.443                  | 2.280                    | 6,732,541               | 9,867,563                      | 208,198                                        |
| 03108000                                | Raccoon Creek at Moffatts Mill, PA               | 5030101 | PA    | 40.62784           | -80.3376            | 461.0                   | 4/9/2002                                   | 9/1/2005               | 21                     | 1.222                  | 1.080                    |                         |                                |                                                |
| 03109500                                | Little Beaver Creek near East Liverpool OH       | 5030101 | OH    | 40.67576           | -80.5404            | 1,284.6                 | 12/17/1975                                 | 12/22/1998             | 257                    | 1.729                  | 1.625                    | 1,199,182               | 1,056,887                      | 61,224                                         |
| 03146500                                | Licking River near Newark OH                     | 5040006 | OH    | 40.05923           | -82.3383            | 1,390.8                 | 10/11/1974                                 | 1/17/1997              | 272                    | 3.605                  | 3.260                    | 2,163,203               | 2,094,262                      | 98,759                                         |
| 03150000                                | Muskingum River at McConnellsville OH            | 5040004 | OH    | 39.64409           | -81.8506            | 19,223.0                | 1/23/1973                                  | 10/17/2004             | 1287                   | 2.257                  | 2.042                    | 19,796,219              | 18,203,154                     | 229,325                                        |
| 03155000                                | LITTLE KANAWHA RIVER AT PALESTINE, WV            | 5030203 | WV    | 39.05893           | -81.3893            | 3,926.4                 | 1/29/1974                                  | 4/3/1995               | 238                    | 0.604                  | 0.520                    | 1,390,454               | 1,729,759                      | 83,613                                         |
| 03157000                                | Clear Creek near Rockbridge OH                   | 5030204 | OH    | 39.58835           | -82.5785            | 230.5                   | 5/4/1977                                   | 9/20/1990              | 31                     | 1.680                  | 1.200                    | 877,074                 | 282,778                        | 400,956                                        |
| 03164000                                | NEW RIVER NEAR GALAX, VA                         | 5050001 | VA    | 36.64646           | -80.9777            | 2,929.3                 | 11/3/1970                                  | 12/17/1998             | 287                    | 0.732                  | 0.705                    | 1,713,851               | 1,662,362                      | 94,963                                         |
| 03167000                                | REED CREEK AT GRAHAM'S FORGE, VA                 | 5050001 | VA    | 36.93946           | -80.887             | 639.7                   | 11/3/1970                                  | 11/17/1998             | 250                    | 1.040                  | 1.000                    | 287,541                 | 371,574                        | 16,554                                         |
| 03170000                                | LITTLE RIVER AT GRAYSONTOWN, VA                  | 5050001 | VA    | 37.03733           | -80.5567            | 777.0                   | 7/25/1979                                  | 9/4/1998               | 130                    | 0.560                  | 0.535                    | 240,018                 | 450,878                        | 16,525                                         |

Table\_S2\_TN

|          |                                               |         |    |          |          |           |            |            |      |       |       |             |             |           |
|----------|-----------------------------------------------|---------|----|----------|----------|-----------|------------|------------|------|-------|-------|-------------|-------------|-----------|
| 03171500 | NEW RIVER AT EGGLESTON, VA                    | 5050002 | VA | 37.29008 | -80.6161 | 7,617.2   | 11/18/1974 | 12/8/1998  | 160  | 1.078 | 1.000 | 3,641,783   | 4,212,080   | 179,974   |
| 03176500 | NEW RIVER AT GLEN LYN, VA                     | 5050002 | VA | 37.37221 | -80.8613 | 9,759.1   | 11/2/1970  | 12/8/1998  | 403  | 1.145 | 1.025 | 3,959,439   | 7,704,718   | 176,576   |
| 03184000 | GREENBRIER RIVER AT HILLDALE, WV              | 5050003 | WV | 37.64012 | -80.8047 | 4,193.2   | 12/4/1973  | 4/6/1995   | 238  | 0.712 | 0.710 | 1,921,209   | 1,775,228   | 89,834    |
| 03189100 | GAULEY RIVER NEAR CRAIGSVILLE, WV             | 5050005 | WV | 38.29094 | -80.6409 | 1,370.1   | 6/25/1974  | 5/28/1998  | 72   | 0.774 | 0.600 | 929,573     | 948,442     | 103,689   |
| 03189600 | GAULEY RIVER BELOW SUMMERSVILLE, WV           | 5050005 | WV | 38.21511 | -80.8882 | 2,087.5   | 6/25/1974  | 5/28/1998  | 62   | 0.696 | 0.700 | 918,481     | 1,281,866   | 76,792    |
| 03193000 | KANAWHA RIVER AT KANAWHA FALLS, WV            | 5050006 | WV | 38.13774 | -81.2135 | 21,680.9  | 12/17/1973 | 9/3/1998   | 38   | 0.853 | 0.698 | 9,421,631   | 12,897,528  | 958,920   |
| 03194700 | ELK RIVER BELOW WEBSTER SPRINGS, WV           | 5050007 | WV | 38.59741 | -80.4905 | 688.9     | 1/23/1974  | 5/27/1998  | 62   | 0.574 | 0.515 | 366,545     | 483,540     | 36,648    |
| 03198350 | CLEAR FORK AT WHITESVILLE, WV                 | 5050009 | WV | 37.96624 | -81.5241 | 162.7     | 10/22/1996 | 3/8/2000   | 49   | 0.678 | 0.692 | 81,963      | 67,547      | 6,225     |
| 03201300 | KANAWHA RIVER AT WINFIELD, WV                 | 5050008 | WV | 38.52657 | -81.9116 | 30,585.3  | 2/15/1974  | 9/19/2007  | 586  | 1.274 | 1.100 | 14,160,528  | 17,319,495  | 566,046   |
| 03202000 | Raccoon Creek at Adamsville OH                | 5090101 | OH | 38.85896 | -82.3618 | 1,515.2   | 8/11/1993  | 9/1/1998   | 47   | 0.880 | 0.630 | 441,364     | 758,474     | 62,532    |
| 03209300 | RUSSELL FORK AT ELKHORN CITY, KY              | 5070202 | KY | 37.30401 | -82.3428 | 1,434.9   | 6/2/1993   | 12/12/1995 | 29   | 0.840 | 0.540 | 621,459     | 400,027     | 126,098   |
| 03209500 | LEVISA FORK AT PIKEVILLE, KY                  | 5070203 | KY | 37.46425 | -82.5263 | 3,190.9   | 3/27/1979  | 11/16/2006 | 257  | 0.649 | 0.619 | 1,093,373   | 894,111     | 67,313    |
| 03215000 | BIG SANDY R AT LOUISA, KY                     | 5070204 | WV | 38.1708  | -82.6347 | 10,093.2  | 10/23/1974 | 9/18/2007  | 385  | 0.980 | 0.850 | 4,697,521   | 3,108,672   | 363,709   |
| 03216600 | OHIO RIVER AT GREENUP DAM NEAR GREENUP, KY    | 5090103 | KY | 38.64684 | -82.8588 | 160,580.0 | 10/22/1974 | 9/13/2007  | 180  | 1.484 | 1.400 | 132,126,594 | 107,140,635 | 4,258,795 |
| 03219500 | Scioto River near Prospect OH                 | 5060001 | OH | 40.4195  | -83.1971 | 1,468.5   | 2/12/1976  | 10/2/1995  | 125  | 5.543 | 4.870 | 3,606,528   | 6,890,304   | 282,520   |
| 03225500 | Olentangy River near Delaware OH              | 5060001 | OH | 40.35499 | -83.0678 | 1,017.9   | 6/18/1974  | 3/28/1995  | 66   | 3.617 | 3.100 | 2,158,667   | 2,962,198   | 376,577   |
| 03229000 | Alum Creek at Columbus OH                     | 5060001 | OH | 39.94484 | -82.9413 | 489.5     | 4/13/1990  | 9/19/1996  | 53   | 1.624 | 1.560 | 278,048     | 530,240     | 22,458    |
| 03229500 | Big Walnut Creek at Rees OH                   | 5060001 | OH | 39.85673 | -82.9571 | 1,409.0   | 1/29/1976  | 9/25/1991  | 27   | 1.694 | 1.480 | 763,305     | 1,530,484   | 66,105    |
| 03230450 | Hellbranch Run near Harrisburg OH             | 5060001 | OH | 39.83063 | -83.1598 | 95.8      | 1/12/1996  | 9/27/2005  | 144  | 3.333 | 3.285 | 290,948     | 115,300     | 23,167    |
| 03230500 | Big Darby Creek at Darbyville OH              | 5060001 | OH | 39.70097 | -83.1096 | 1,383.1   | 1/29/1976  | 12/12/1996 | 258  | 4.089 | 3.790 | 4,075,287   | 4,265,302   | 293,245   |
| 03230800 | Deer Creek at Mount Sterling OH               | 5060002 | OH | 39.71514 | -83.2574 | 590.5     | 6/19/1974  | 12/16/1996 | 58   | 4.172 | 3.200 | 1,762,453   | 2,162,758   | 350,022   |
| 03231500 | Scioto River at Chillicothe OH                | 5060002 | OH | 39.34217 | -82.9713 | 9,968.9   | 7/25/1974  | 10/18/2004 | 2767 | 4.622 | 4.310 | 20,088,578  | 28,576,209  | 176,929   |
| 03232000 | Paint Creek near Greenfield OH                | 5060003 | OH | 39.37929 | -83.3754 | 644.9     | 6/1/1993   | 11/0/1997  | 43   | 5.428 | 5.320 | 1,999,955   | 2,449,097   | 335,707   |
| 03234500 | Scioto River at Higby OH                      | 5060002 | OH | 39.21192 | -82.8644 | 13,289.3  | 10/3/1974  | 12/14/1998 | 209  | 4.209 | 4.000 | 20,747,207  | 35,695,119  | 1,227,434 |
| 03237280 | Upper Twin Creek at McGaw OH                  | 5090201 | OH | 38.64375 | -83.2155 | 31.6      | 10/21/1980 | 8/29/2001  | 154  | 0.541 | 0.480 | 3,153       | 12,340      | 569       |
| 03240000 | Little Miami River near Oldtown OH            | 5090202 | OH | 39.74792 | -83.9314 | 334.1     | 9/16/1975  | 12/17/1998 | 253  | 4.589 | 4.345 | 798,867     | 731,415     | 25,724    |
| 03242200 | Anderson Fork near New Burlington OH          | 5090202 | OH | 39.56638 | -83.9028 | 201.5     | 7/27/1983  | 9/1/1998   | 25   | 3.601 | 2.655 |             |             |           |
| 03245500 | Little Miami River at Milford OH              | 5090202 | OH | 39.17138 | -84.2985 | 3,115.8   | 12/19/1974 | 9/13/2000  | 233  | 3.944 | 3.500 | 7,250,904   | 6,137,585   | 541,126   |
| 03248100 | Little Miami River at Cincinnati OH           | 5090202 | OH | 39.10921 | -84.4016 | 4,517.0   | 7/22/1975  | 9/14/2007  | 205  | 3.144 | 3.000 | 6,060,496   | 8,000,825   | 405,598   |
| 03265000 | Stillwater River at Pleasant Hill OH          | 5080001 | OH | 40.05779 | -84.356  | 1,302.8   | 5/20/1982  | 12/17/1998 | 54   | 4.811 | 4.010 | 5,411,659   | 6,752,496   | 719,119   |
| 03267900 | Mad River at St Paris Pike at Eagle City OH   | 5080001 | OH | 39.96415 | -83.8314 | 802.9     | 10/6/1976  | 10/13/2004 | 314  | 4.408 | 4.310 | 1,608,059   | 1,821,883   | 29,442    |
| 03270000 | Mad River near Dayton OH                      | 5080001 | OH | 39.79702 | -84.0916 | 1,644.7   | 7/2/1974   | 12/27/1990 | 88   | 3.711 | 3.600 | 2,736,865   | 2,479,857   | 78,874    |
| 03271601 | Great Miami River below Miamisburg OH         | 5080002 | OH | 39.60687 | -84.2865 | 7,031.9   | 4/22/1996  | 10/18/2004 | 2713 | 4.939 | 4.441 | 16,861,463  | 16,403,568  | 177,338   |
| 03274000 | Great Miami River at Hamilton OH              | 5080002 | OH | 39.39116 | -84.5718 | 9,401.7   | 1/30/1975  | 9/18/2001  | 150  | 4.794 | 4.605 | 19,885,029  | 21,958,086  | 1,197,723 |
| 03274600 | Great Miami River at New Baltimore OH         | 5080002 | OH | 39.26318 | -84.6677 | 9,878.3   | 10/1/1974  | 9/1/1993   | 196  | 5.333 | 4.900 | 23,296,697  | 23,060,330  | 974,989   |
| 03275000 | WHITEWATER RIVER NEAR ALPINE, IN              | 5080003 | IN | 39.57944 | -85.1574 | 1,352.0   | 2/18/1987  | 9/13/2000  | 70   | 3.985 | 3.600 | 3,293,462   | 3,772,740   | 212,922   |
| 03275600 | EAST FORK WHITEWATER RIVER AT ABINGTON, IND.  | 5080003 | IN | 39.73251 | -84.9596 | 518.0     | 2/28/1977  | 2/14/2006  | 124  | 4.023 | 3.800 | 1,039,300   | 1,397,440   | 59,553    |
| 03277200 | OHIO RIVER AT MARKLAND DAM NEAR WARSAW, KY    | 5090203 | KY | 38.77632 | -84.9642 | 215,410.3 | 10/30/1974 | 9/18/2007  | 312  | 2.057 | 1.910 | 182,062,089 | 203,048,696 | 8,371,426 |
| 03281000 | MIDDLE FORK KENTUCKY RIVER AT TALLEGA, KY     | 5100202 | KY | 37.55533 | -83.5938 | 1,390.8   | 6/2/1982   | 9/19/2006  | 266  | 0.468 | 0.405 | 323,503     | 467,950     | 22,925    |
| 03281500 | SOUTH FORK KENTUCKY RIVER AT BOONEVILLE, KY   | 5100203 | KY | 37.47928 | -83.6751 | 1,870.0   | 6/2/1982   | 9/19/2006  | 257  | 0.502 | 0.443 | 487,198     | 731,725     | 40,011    |
| 03285000 | DIX RIVER NEAR DANVILLE, KY                   | 5100205 | KY | 37.64208 | -84.6609 | 823.6     | 10/15/1985 | 10/3/2006  | 190  | 1.513 | 1.414 | 1,030,859   | 1,049,401   | 74,854    |
| 03289500 | ELKHORN CREEK NEAR FRANKFORT, KY              | 5100205 | KY | 38.26859 | -84.8146 | 1,225.1   | 10/14/1987 | 9/19/2006  | 97   | 4.315 | 3.900 | 2,187,725   | 1,632,593   | 188,022   |
| 03290500 | KENTUCKY RIVER AT LOCK 2 AT LOCKPORT, KY      | 5100205 | KY | 38.43867 | -84.9625 | 16,006.2  | 2/7/1973   | 6/6/1995   | 211  | 1.406 | 1.300 | 11,334,351  | 11,104,585  | 475,537   |
| 03291500 | EAGLE CREEK AT GLENCOE, KY                    | 5100205 | KY | 38.70589 | -84.8252 | 1,131.8   | 12/13/1988 | 11/17/2006 | 164  | 1.073 | 0.920 | 730,523     | 862,376     | 78,447    |
| 03294600 | OHIO RIVER AT KOSMOSDALE, KY                  | 5140101 | KY | 38.03519 | -85.9175 | 236,208.0 | 10/12/1976 | 9/18/2007  | 270  | 2.102 | 2.020 | 214,652,195 | 220,372,452 | 7,425,131 |
| 03298500 | SALT RIVER AT SHEPHERDSVILLE, KY              | 5140102 | KY | 37.98519 | -85.7174 | 3,100.2   | 10/31/1978 | 12/19/2006 | 364  | 1.926 | 1.700 | 3,537,572   | 3,689,896   | 167,455   |
| 03301630 | ROLLING FORK NEAR LEBANON JUNCTION, KY        | 5140103 | KY | 37.82258 | -85.7477 | 3,561.3   | 10/8/1974  | 12/19/2006 | 275  | 1.469 | 1.300 | 3,081,751   | 4,363,123   | 172,808   |
| 03303280 | OHIO RIVER AT CANNELTON DAM AT CANNELTON, IN  | 5140201 | KY | 37.89848 | -86.7042 | 251,230.0 | 10/1/1975  | 9/19/2007  | 442  | 1.843 | 1.812 | 234,617,401 | 233,546,731 | 5,768,358 |
| 03308500 | GREEN RIVER AT MUNFORDVILLE, KY               | 5110001 | KY | 37.26779 | -85.8857 | 4,333.1   | 3/25/1980  | 11/14/2006 | 304  | 1.195 | 1.141 | 3,295,823   | 5,678,041   | 128,763   |
| 03314500 | BARREN RIVER AT BOWLING GREEN, KY             | 5110002 | KY | 37.0014  | -86.4305 | 4,788.9   | 6/13/1979  | 9/12/1994  | 159  | 1.514 | 1.476 | 3,910,436   | 6,111,572   | 173,321   |
| 03322500 | WABASH RIVER NEAR NEW CORYDON, IND            | 5120101 | IN | 40.56323 | -84.8028 | 678.6     | 12/22/1970 | 2/13/2006  | 41   | 7.617 | 6.200 | 3,741,130   | 4,439,383   | 696,108   |
| 03325500 | MISSISSINAWA RIVER NEAR RIDGEVILLE, IND.      | 5120103 | IN | 40.28015 | -84.9958 | 344.5     | 2/5/1980   | 2/13/2006  | 152  | 5.469 | 5.250 | 1,596,372   | 2,104,568   | 154,919   |
| 03328500 | EEL RIVER NEAR LOGANSPOUT, IN                 | 5120104 | IN | 40.78212 | -86.2646 | 2,043.5   | 1/22/1976  | 2/22/2006  | 164  | 4.247 | 3.700 | 4,708,003   | 5,511,492   | 284,709   |
| 03329700 | DEER CREEK NEAR DELPHI, IND.                  | 5120105 | IN | 40.59032 | -86.6217 | 709.7     | 3/25/1998  | 2/22/2006  | 92   | 5.189 | 4.250 | 2,563,364   | 3,201,954   | 234,048   |
| 03335500 | WABASH RIVER AT LAFAYETTE IND                 | 5120108 | IN | 40.42193 | -86.8963 | 18,821.5  | 1/16/1980  | 12/6/1995  | 175  | 4.826 | 4.800 | 43,574,901  | 63,970,872  | 1,969,051 |
| 03336645 | MIDDLE FORK VERMILION RIVER ABOVE OAKWOOD, IL | 5120109 | IL | 40.13627 | -87.7462 | 1,118.9   | 10/19/1978 | 12/8/1998  | 189  | 6.611 | 6.900 | 6,908,986   | 2,542,016   | 723,618   |
| 03338780 | NORTH FORK VERMILION RIVER NEAR BISMARCK, IL  | 5120109 | IL | 40.26517 | -87.6438 | 678.6     | 11/10/1988 | 12/30/1998 | 88   | 7.160 | 7.600 | 6,317,944   | 1,836,245   | 853,652   |
| 03339000 | VERMILION RIVER NEAR DANVILLE, IL             | 5120109 | IL | 40.0874  | -87.597  | 3,341.1   | 4/11/1978  | 12/10/1998 | 170  | 7.805 | 7.900 | 10,451,022  | 8,397,587   | 460,278   |
| 03341910 | WABASH RIVER AT HUTSONVILLE, IL               | 5120111 | IN | 39.11028 | -87.655  | 33,715.1  | 7/20/1972  | 6/20/1973  | 11   | 4.644 | 4.270 |             |             |           |
| 03341920 | TURMAN CREEK NR FARMERSBURG, IN               | 5120111 | IN | 39.24448 | -87.4078 | 33.7      | 7/20/1972  | 6/20/1973  | 12   | 4.688 | 4.571 |             |             |           |

Table\_S2\_TN

|           |                                                 |         |    |          |          |          |            |            |     |       |       |             |             |           |  |  |  |  |  |
|-----------|-------------------------------------------------|---------|----|----------|----------|----------|------------|------------|-----|-------|-------|-------------|-------------|-----------|--|--|--|--|--|
| 03343395  | EMBARRAS RIVER AT CAMARGO, IL                   | 5120112 | IL | 39.79916 | -88.1701 | 466.2    | 9/27/1978  | 1/31/1979  | 4   | 8.475 | 9.050 |             |             |           |  |  |  |  |  |
| 03345500  | EMBARRAS RIVER AT STE. MARIE, IL                | 5120112 | IL | 38.93536 | -88.0146 | 3,926.4  | 11/17/1986 | 9/10/1996  | 42  | 5.530 | 5.350 | 11,040,984  | 8,572,962   | 1,822,120 |  |  |  |  |  |
| 03346000  | NORTH FORK EMBARRAS RIVER NEAR OBLONG, IL       | 5120112 | IL | 39.00893 | -87.9461 | 823.6    |            |            |     |       |       |             |             |           |  |  |  |  |  |
| 03351500  | FALL CREEK NEAR FORTVILLE, IND.                 | 5120201 | IN | 39.95456 | -85.8676 | 437.7    | 10/26/1972 | 2/15/2006  | 89  | 3.164 | 2.800 | 753,417     | 1,267,739   | 39,502    |  |  |  |  |  |
| 03354000  | WHITE RIVER NEAR CANTERTON, IN                  | 5120201 | IN | 39.49722 | -86.4009 | 6,330.0  | 10/26/1972 | 8/17/1995  | 187 | 5.380 | 5.200 | 11,850,680  | 19,191,459  | 441,062   |  |  |  |  |  |
| 03357500  | BIG WALNUT CREEK NEAR REELSVILLE, IN            | 5120203 | IN | 39.53572 | -86.9763 | 844.3    | 3/17/1999  | 11/13/2003 | 55  | 3.181 | 2.825 | 1,365,613   | 1,725,285   | 100,161   |  |  |  |  |  |
| 03358000  | MILL CREEK NEAR CATARACT, IND.                  | 5120203 | IN | 39.43349 | -86.7634 | 634.6    | 7/26/1971  | 2/14/2006  | 253 | 3.411 | 3.100 | 2,635,976   | 1,116,099   | 241,066   |  |  |  |  |  |
| 03362500  | SUGAR CREEK NEAR EDINBURGH, IN                  | 5120204 | IN | 39.36097 | -85.9982 | 1,227.7  | 5/29/1996  | 2/9/2006   | 98  | 3.186 | 3.150 | 3,031,068   | 3,520,223   | 201,987   |  |  |  |  |  |
| 03366500  | MUSCATATUCK RIVER NEAR DEPUTY, IN               | 5120207 | IN | 38.80426 | -85.6738 | 758.9    | 4/5/1993   | 4/18/1995  | 28  | 1.504 | 1.450 | 774,203     | 841,202     | 133,212   |  |  |  |  |  |
| 03374100  | WHITE RIVER AT HAZLETON, IN                     | 5120202 | IN | 38.48977 | -87.55   | 29,280.0 | 2/21/1973  | 2/13/2006  | 502 | 2.726 | 2.600 | 42,854,016  | 59,715,887  | 1,302,622 |  |  |  |  |  |
| 03378000  | BONPAS CREEK AT BROWNS, IL                      | 5120113 | IL | 38.38246 | -87.9769 | 590.5    | 11/2/1989  | 11/2/1989  | 1   | 1.250 | 1.250 |             |             |           |  |  |  |  |  |
| 03378500  | WABASH RIVER AT NEW HARMONY, IND.               | 5120113 | IN | 38.1314  | -87.9429 | 75,716.1 | 11/7/1974  | 7/13/2006  | 288 | 3.453 | 3.400 | 124,814,331 | 180,130,745 | 4,410,585 |  |  |  |  |  |
| 03378635  | LITTLE WABASH RIVER NEAR EFFINGHAM, IL          | 5120114 | IL | 39.10344 | -88.5926 | 621.6    | 6/11/1986  | 2/14/1990  | 4   | 1.800 | 1.325 |             |             |           |  |  |  |  |  |
| 03378900  | LITTLE WABASH RIVER AT LOUISVILLE, IL           | 5120114 | IL | 38.77291 | -88.497  | 1,929.6  | 8/8/1989   | 2/22/1990  | 3   | 1.873 | 1.870 |             |             |           |  |  |  |  |  |
| 03379500  | LITTLE WABASH RIVER BELOW CLAY CITY, IL         | 5120114 | IL | 38.63345 | -88.2953 | 2,929.3  | 8/7/1989   | 2/22/1990  | 3   | 1.533 | 1.150 |             |             |           |  |  |  |  |  |
| 03379600  | LITTLE WABASH RIVER AT BLOOD, IL                | 5120114 | IL | 38.51894 | -88.1319 | 3,577.7  | 8/7/1989   | 2/21/1990  | 3   | 1.567 | 1.250 |             |             |           |  |  |  |  |  |
| 03380500  | SKILLET FORK AT WAYNE CITY, IL                  | 5120115 | IL | 38.35867 | -88.5848 | 1,201.8  | 7/31/1989  | 7/13/1998  | 4   | 2.127 | 1.985 |             |             |           |  |  |  |  |  |
| 03381495  | LITTLE WABASH RIVER AT MAIN ST AT CARM, IL      | 5120114 | IL | 38.09232 | -88.1561 | 7,997.9  | 10/29/1979 | 12/16/1998 | 178 | 2.229 | 2.100 | 7,547,067   | 11,780,193  | 359,332   |  |  |  |  |  |
| 03382090  | SUGAR CREEK NEAR STONEFORT, IL                  | 5140204 | IL | 37.65533 | -88.7633 | 90.7     | 6/8/1993   | 12/14/1993 | 5   | 1.209 | 0.900 |             |             |           |  |  |  |  |  |
| 03382100  | SOUTH FORK SALINE RIVER NR CARRIER MILLS, IL    | 5140204 | IL | 37.63643 | -88.6772 | 380.7    | 12/14/1977 | 12/10/1998 | 187 | 0.992 | 0.893 | 222,697     | 195,148     | 25,612    |  |  |  |  |  |
| 03382185  | BANKSTON FORK NEAR DORRIS HEIGHTS, IL           | 5140204 | IL | 37.76754 | -88.5404 | 201.2    | 6/8/1993   | 12/14/1993 | 4   | 1.278 | 1.270 |             |             |           |  |  |  |  |  |
| 03384450  | LUSK CREEK NEAR EDDYVILLE, IL                   | 5140203 | IL | 37.47253 | -88.5476 | 111.1    | 9/19/1979  | 12/23/1998 | 171 | 0.413 | 0.350 | 31,716      | 51,471      | 3,780     |  |  |  |  |  |
| 03404500  | CUMBERLAND RIVER AT CUMBERLAND FALLS, KY        | 5130101 | KY | 36.83694 | -84.3437 | 5,120.4  | 1/22/1979  | 8/21/2006  | 258 | 0.612 | 0.527 | 1,793,472   | 2,405,380   | 111,806   |  |  |  |  |  |
| 03428500  | WEST FORK STONES RIVER NEAR SMYRNA, TN          | 5130203 | TN | 35.94027 | -86.4649 | 613.8    | 9/29/1982  | 12/7/1998  | 31  | 2.452 | 1.770 | 492,953     | 701,115     | 59,186    |  |  |  |  |  |
| 03434500  | HARPETH RIVER NEAR KINGSTON SPRINGS, TN         | 5130204 | TN | 36.122   | -87.0989 | 1,763.8  | 6/25/1975  | 10/22/1998 | 50  | 1.334 | 1.005 | 1,694,607   | 1,402,023   | 259,178   |  |  |  |  |  |
| 03612000  | CACHE RIVER AT FORMAN, IL                       | 5140206 | IL | 37.3352  | -88.9258 | 632.0    | 6/9/1992   | 12/8/1992  | 3   | 0.912 | 0.860 |             |             |           |  |  |  |  |  |
| 04024000  | ST. LOUIS RIVER AT SCANLON, MN                  | 4010201 | MN | 46.70322 | -92.4178 | 8,883.7  | 6/4/1974   | 8/1/1994   | 276 | 1.033 | 0.990 | 2,388,795   | 1,334,465   | 52,747    |  |  |  |  |  |
| 04024430  | NEMADJI RIVER NEAR SOUTH SUPERIOR, WI           | 4010301 | WI | 46.63326 | -92.0943 | 1,087.8  | 1/28/1974  | 3/19/1998  | 256 | 0.803 | 0.700 | 376,633     | 339,828     | 15,848    |  |  |  |  |  |
| 04027595  | BAD RIVER AT ODANAH, WI                         | 4010302 | WI | 46.61028 | -90.6869 | 2,512.3  | 11/30/1970 | 2/7/2005   | 183 | 0.642 | 0.560 | 598,986     | 685,391     | 61,668    |  |  |  |  |  |
| 04040000  | ONTONAGON RIVER NEAR ROCKLAND, MI               | 4020102 | MI | 46.7207  | -89.2075 | 3,470.6  | 10/3/1974  | 8/29/1995  | 136 | 0.515 | 0.460 | 711,812     | 647,422     | 32,530    |  |  |  |  |  |
| 04057005  | MANISTIQUE RIVER AT MANISTIQUE, MI              | 4060106 | MI | 45.95164 | -86.2485 | 3,755.5  | 1/25/1971  | 10/26/1995 | 236 | 0.614 | 0.595 | 946,083     | 575,097     | 18,477    |  |  |  |  |  |
| 04063700  | POPPLE RIVER NEAR FENCE, WI                     | 4030108 | WI | 45.76347 | -88.4632 | 360.0    | 10/21/1980 | 9/20/2007  | 229 | 0.644 | 0.561 | 60,721      | 60,654      | 2,798     |  |  |  |  |  |
| 04067500  | MENOMINEE RIVER NEAR MC ALLISTER, WI            | 4030108 | WI | 45.32572 | -87.6621 | 10,178.7 | 10/24/1979 | 8/8/2007   | 113 | 0.649 | 0.570 | 1,430,394   | 1,947,240   | 83,905    |  |  |  |  |  |
| 04071000  | OCONTO RIVER NEAR GILLETT, WI                   | 4030104 | WI | 44.86465 | -88.3001 | 1,826.0  | 1/29/1973  | 10/13/2003 | 208 | 0.689 | 0.623 | 325,417     | 552,016     | 23,048    |  |  |  |  |  |
| 04072050  | DUCK CREEK AT SEMINARY ROAD NEAR ONEIDA, WI     | 4030103 | WI | 44.46521 | -88.2187 | 247.3    | 4/7/1993   | 10/20/2004 | 108 | 3.497 | 2.700 | 308,304     | 318,826     | 29,713    |  |  |  |  |  |
| 04072150  | DUCK CREEK NEAR HOWARD, WI                      | 4030103 | WI | 44.53371 | -88.1291 | 279.7    | 9/21/1988  | 10/15/2002 | 217 | 2.875 | 2.255 | 250,337     | 368,806     | 33,256    |  |  |  |  |  |
| 040734644 | SILVER CREEK AT SOUTH KORO ROAD NEAR RIPON, WI  | 4030201 | WI | 43.8581  | -88.87   | 93.8     | 7/10/1995  | 7/10/1995  | 1   | 5.800 | 5.800 |             |             |           |  |  |  |  |  |
| 04073468  | GREEN LAKE INLET AT CT HIGHWAY A NR GREEN L, WI | 4030201 | WI | 43.82369 | -88.9269 | 138.6    |            |            |     |       |       |             |             |           |  |  |  |  |  |
| 04073470  | PUCHYAN RIVER AT GREEN LAKE, WI                 | 4030201 | WI | 43.84665 | -88.9601 | 266.8    |            |            |     |       |       |             |             |           |  |  |  |  |  |
| 04075050  | WOLF RIVER AT HIGHWAY M NEAR LANGLADE, WI       | 4030202 | WI | 45.12632 | -88.6635 | 1,266.5  | 4/26/1994  | 8/28/2001  | 29  | 0.557 | 0.525 | 208,324     | 256,876     | 10,472    |  |  |  |  |  |
| 04077100  | WOLF RIVER AT KESHENA, WI                       | 4030202 | WI | 44.88332 | -88.6348 | 2,297.8  | 5/31/1995  | 8/27/2001  | 27  | 0.584 | 0.535 | 404,848     | 484,196     | 28,836    |  |  |  |  |  |
| 04077630  | RED RIVER AT MORGAN ROAD NEAR MORGAN, WI        | 4030202 | WI | 44.89814 | -88.8441 | 295.3    | 11/4/1992  | 7/2/1998   | 171 | 1.213 | 1.074 | 138,169     | 125,558     | 4,798     |  |  |  |  |  |
| 04080798  | TOMORROW RIVER NEAR NELSONVILLE, WI             | 4030202 | WI | 44.52432 | -89.3381 | 114.0    | 4/9/1993   | 10/17/2002 | 38  | 2.559 | 2.500 | 83,212      | 66,428      | 6,181     |  |  |  |  |  |
| 04085139  | FOX RIVER AT MOUTH AT GREEN BAY, WI             | 4030103 | WI | 44.53949 | -88.0049 | 16,394.7 | 10/5/1988  | 9/15/2005  | 153 | 1.640 | 1.575 | 6,283,332   | 6,658,683   | 525,614   |  |  |  |  |  |
| 04085427  | MANITOWOC RIVER AT MANITOWOC, WI                | 4030101 | WI | 44.10708 | -87.7151 | 1,362.3  | 3/29/1979  | 9/20/2007  | 143 | 2.670 | 2.400 | 851,841     | 1,786,111   | 44,990    |  |  |  |  |  |
| 04086500  | CEDAR CREEK NEAR CEDARBURG, WI                  | 4040003 | WI | 43.32308 | -87.9786 | 310.8    | 1/25/1977  | 11/8/2004  | 57  | 2.269 | 2.135 | 320,036     | 343,372     | 29,785    |  |  |  |  |  |
| 04086600  | MILWAUKEE RIVER NEAR CEDARBURG, WI              | 4040003 | WI | 43.27999 | -87.9421 | 1,572.1  | 9/28/1994  | 8/29/2005  | 19  | 2.220 | 2.138 |             |             |           |  |  |  |  |  |
| 04087000  | MILWAUKEE RIVER AT MILWAUKEE, WI                | 4040003 | WI | 43.10001 | -87.909  | 1,802.6  | 1/25/1973  | 9/26/2007  | 436 | 2.141 | 2.000 | 1,007,138   | 1,895,869   | 25,666    |  |  |  |  |  |
| 04087170  | MILWAUKEE RIVER AT MOUTH AT MILWAUKEE, WI       | 4060200 | WI | 43.02505 | -87.8985 | 2,258.5  | 3/29/1994  | 8/29/2005  | 47  | 1.440 | 1.343 | 920,905     | 2,295,325   | 53,850    |  |  |  |  |  |
| 04101500  | ST. JOSEPH RIVER AT NILES, MI                   | 4050001 | MI | 41.82928 | -86.2596 | 9,494.9  | 2/12/1979  | 9/22/1995  | 103 | 2.560 | 2.400 | 9,114,864   | 12,372,920  | 211,118   |  |  |  |  |  |
| 04102533  | ST. JOSEPH RIVER AT ST. JOSEPH, MI              | 4050001 | MI | 42.11318 | -86.4853 | 12,095.3 | 1/14/1971  | 10/27/1995 | 247 | 2.288 | 2.150 | 10,613,640  | 15,051,773  | 125,572   |  |  |  |  |  |
| 04119300  | GRAND RIVER AT EASTMANVILLE, MI                 | 4050006 | MI | 43.01511 | -85.9559 | 13,545.7 | 2/14/1979  | 10/7/1994  | 98  | 2.627 | 2.415 | 11,591,397  | 15,148,541  | 464,881   |  |  |  |  |  |
| 04122500  | PERE MARQUETTE RIVER AT SCOTTVILLE, MI          | 4060101 | MI | 43.94469 | -86.2792 | 1,763.8  | 2/16/1971  | 11/17/2005 | 108 | 0.485 | 0.460 | 360,382     | 603,413     | 17,352    |  |  |  |  |  |
| 04137500  | AU SABLE RIVER NEAR AU SABLE, MI                | 4070007 | MI | 44.43622 | -83.4344 | 4,504.0  | 6/6/1978   | 11/9/2005  | 183 | 0.314 | 0.279 | 262,124     | 739,766     | 21,274    |  |  |  |  |  |
| 04156100  | TITTABAWASSEE RIVER NR MIDLAND, MI              | 4080201 | MI | 43.56864 | -84.1936 | 6,345.5  | 7/24/1980  | 9/23/1996  | 216 | 2.008 | 1.635 | 3,792,584   | 4,200,703   | 127,302   |  |  |  |  |  |
| 04157000  | SAGINAW RIVER AT SAGINAW, MI                    | 4080206 | MI | 43.41322 | -83.9642 | 15,695.4 | 3/12/1976  | 7/21/2005  | 67  | 2.547 | 2.300 | 10,295,686  | 14,125,265  | 928,313   |  |  |  |  |  |
| 04161820  | CLINTON R AT STERLING HEIGHTS, MI               | 4090003 | MI | 42.61452 | -83.0262 | 800.3    | 4/4/1996   | 8/30/2005  | 81  | 2.311 | 1.977 | 431,451     | 350,969     | 19,395    |  |  |  |  |  |
| 04165500  | CLINTON R AT MORAVIAN DRIVE AT MT. CLEMENS, MI  | 4090003 | MI | 42.59572 | -82.9093 | 1,901.1  | 10/8/1974  | 8/24/1995  | 136 | 3.818 | 3.600 | 1,884,566   | 1,560,491   | 62,111    |  |  |  |  |  |
| 04170000  | HURON RIVER AT MILFORD, MI                      | 4090005 | MI | 42.57892 | -83.6276 | 341.9    | 4/6/1984   | 9/8/2003   | 47  | 1.011 | 0.950 | 85,418      | 143,623     | 6,631     |  |  |  |  |  |
| 04170500  | HURON RIVER NEAR NEW HUDSON, MI                 | 4090005 | MI | 42.51253 | -83.6763 | 383.3    | 4/6/1984   | 9/8/2003   | 44  | 0.924 | 0.900 | 68,285      | 123,541     | 5,060     |  |  |  |  |  |

Table\_S2\_TN

|            |                                                  |         |    |          |          |          |            |            |      |       |       |            |            |           |
|------------|--------------------------------------------------|---------|----|----------|----------|----------|------------|------------|------|-------|-------|------------|------------|-----------|
| 04175600   | RIVER RAISIN NEAR MANCHESTER, MI                 | 4100002 | MI | 42.16796 | -84.0765 | 341.9    | 4/2/1996   | 8/26/2004  | 61   | 0.927 | 0.919 | 83,109     | 222,392    | 2,182     |
| 04176500   | RIVER RAISIN NEAR MONROE, MI                     | 4100002 | MI | 41.96033 | -83.5311 | 2,698.8  | 1/19/1978  | 9/30/2004  | 6679 | 3.772 | 3.191 | 5,209,595  | 5,017,828  | 78,222    |
| 04178000   | ST. JOSEPH RIVER NEAR NEWVILLE, IN               | 4100003 | IN | 41.38571 | -84.8019 | 1,579.9  | 3/7/1996   | 10/25/2004 | 89   | 2.492 | 2.023 | 1,782,752  | 2,905,728  | 175,155   |
| 04186500   | Auglaize River near Fort Jennings OH             | 4100007 | OH | 40.94899 | -84.2665 | 859.9    | 3/8/1996   | 8/9/2005   | 85   | 5.111 | 4.445 | 2,815,766  | 4,316,435  | 364,864   |
| 04189000   | Blanchard River near Findlay OH                  | 4100008 | OH | 41.05609 | -83.6879 | 896.1    | 4/23/1973  | 9/19/1996  | 129  | 8.273 | 8.240 | 1,795,960  | 3,296,371  | 159,518   |
| 04193500   | Maumee River at Waterville OH                    | 4100009 | OH | 41.50016 | -83.7139 | 16,394.7 | 4/24/1973  | 8/10/2005  | 8330 | 5.610 | 5.320 | 52,272,291 | 67,826,179 | 874,357   |
| 04197100   | Honey Creek at Melmore OH                        | 4100011 | OH | 41.02214 | -83.1096 | 385.9    | 2/16/1976  | 9/30/2004  | 8429 | 5.802 | 4.810 | 1,104,792  | 1,685,775  | 18,836    |
| 04198000   | Sandusky River near Fremont OH                   | 4100011 | OH | 41.30779 | -83.1584 | 3,240.1  | 4/23/1973  | 9/30/2004  | 7411 | 4.925 | 4.306 | 14,118,936 | 13,977,196 | 335,388   |
| 04199000   | Huron River at Milan OH                          | 4100012 | OH | 41.30077 | -82.6088 | 960.9    | 10/2/1973  | 8/20/1998  | 1761 | 4.097 | 3.390 | 2,239,787  | 1,969,598  | 71,325    |
| 04199500   | Vermilion River near Vermilion OH                | 4100012 | OH | 41.38199 | -82.3169 | 678.6    | 4/23/1973  | 9/30/2004  | 1462 | 2.815 | 2.195 | 2,308,865  | 1,153,826  | 150,142   |
| 04200500   | Black River at Elyria OH                         | 4110001 | OH | 41.37967 | -82.1047 | 1,025.6  | 4/23/1973  | 12/9/1998  | 325  | 5.498 | 4.300 | 1,338,022  | 1,615,378  | 149,278   |
| 04206000   | Cuyahoga River at Old Portage OH                 | 4110002 | OH | 41.13559 | -81.5472 | 1,046.4  | 3/27/1975  | 9/19/2000  | 18   | 1.690 | 1.676 |            |            |           |
| 04208000   | Cuyahoga River at Independence OH                | 4110002 | OH | 41.39532 | -81.6294 | 1,831.1  | 9/27/1973  | 9/30/2004  | 7602 | 3.531 | 3.300 | 2,372,409  | 2,365,637  | 16,659    |
| 04209000   | Chagrin River at Willoughby OH                   | 4110003 | OH | 41.63136 | -81.4027 | 637.1    | 10/23/1973 | 12/1/1998  | 251  | 0.904 | 0.800 | 368,619    | 484,566    | 42,331    |
| 04212100   | Grand River near Painesville OH                  | 4110004 | OH | 41.7188  | -81.2278 | 1,774.2  | 11/26/1975 | 9/30/2004  | 5152 | 1.014 | 0.910 | 1,220,025  | 1,860,623  | 17,681    |
| 04213500   | CATTARAUGUS CREEK AT GOWANDA NY                  | 4120102 | NY | 42.46389 | -78.9352 | 1,129.2  | 7/16/1975  | 2/26/1998  | 164  | 1.543 | 1.485 | 1,116,475  | 1,121,544  | 43,979    |
| 04214500   | BUFFALO CREEK AT GARDENVILLE NY                  | 4120103 | NY | 42.85478 | -78.755  | 367.8    | 10/22/1970 | 11/8/1994  | 81   | 0.975 | 0.890 | 342,030    | 476,489    | 33,518    |
| 04227000   | CANASERAGA CREEK AT SHAKERS CROSSING NY          | 4130002 | NY | 42.7371  | -77.8404 | 867.7    | 10/8/1974  | 11/4/1996  | 40   | 1.447 | 1.384 | 502,160    | 577,042    | 61,409    |
| 04229500   | HONEOYE CREEK AT HONEOYE FALLS NY                | 4130003 | NY | 42.95681 | -77.589  | 507.6    | 4/6/1998   | 4/6/2005   | 546  | 0.775 | 0.630 | 112,269    | 260,498    | 4,601     |
| 04230500   | OATKA CREEK AT GARBUTT NY                        | 4130003 | NY | 43.00998 | -77.7914 | 518.0    | 3/22/1989  | 9/16/2005  | 690  | 2.186 | 2.177 | 600,060    | 846,727    | 11,241    |
| 04232034   | IRONDEQUOIT CR AT RAILROAD MILLS, NR FISHERS NY  | 4140101 | NY | 43.02746 | -77.4784 | 101.5    | 11/27/1991 | 9/16/2005  | 378  | 1.702 | 1.625 | 57,676     | 49,851     | 1,178     |
| 0423205010 | IRONDEQUOIT CR ABV BLOSSOM RD NR ROCHESTER NY    | 4140101 | NY | 43.14506 | -77.5119 | 367.8    | 12/1/1980  | 8/31/2005  | 2944 | 1.859 | 1.800 | 213,124    | 138,625    | 2,349     |
| 0423205025 | IRONDEQUOIT CREEK AT EMPIRE BLVD, ROCHESTER NY   | 4140101 | NY | 43.17567 | -77.5266 | 391.1    | 6/28/1990  | 12/30/2002 | 1650 | 1.726 | 1.675 | 171,184    | 145,129    | 2,004     |
| 04260500   | BLACK RIVER AT WATERTOWN NY                      | 4150101 | NY | 43.98543 | -75.9251 | 4,827.8  | 10/8/1970  | 8/9/1994   | 274  | 0.792 | 0.715 | 3,387,768  | 3,747,991  | 93,196    |
| 05046000   | OTTER TAIL RIVER BL ORWELL D NR FERGUS FALLS, MN | 9020103 | MN | 46.20961 | -96.1849 | 4,506.6  | 4/18/1985  | 6/16/2003  | 61   | 0.888 | 0.825 | 505,737    | 906,276    | 33,762    |
| 05046450   | OTTER TAIL RIVER AB BRECKENRIDGE, MN             | 9020103 | MN | 46.26163 | -96.5462 | 4,382.1  | 5/20/1997  | 6/17/2003  | 48   | 0.794 | 0.795 | 503,079    | 1,518,588  | 49,793    |
| 05046502   | OTTER TAIL RIVER AT 11TH ST IN BRECKENRIDGE, MN  | 9020103 | MN | 46.2744  | -96.5801 | 4,416.0  | 9/11/2001  | 7/16/2007  | 47   | 1.157 | 0.898 | 667,984    | 1,556,326  | 109,104   |
| 05049000   | MUSTINKA RIVER AB WHEATON, MN                    | 9020102 | MN | 45.82079 | -96.4906 | 1,731.8  | 6/1/1994   | 9/4/2003   | 31   | 2.000 | 1.785 | 1,139,547  | 1,565,081  | 120,993   |
| 05051300   | BOIS DE SIOUX RIVER NEAR DORAN, MN               | 9020101 | ND | 46.1523  | -96.5794 | 4,869.2  | 3/27/1993  | 5/24/2005  | 46   | 1.949 | 1.530 | 824,341    | 1,127,928  | 164,186   |
| 05051510   | RED RIVER OF THE NORTH BELOW WAHPETON, ND        | 9020104 | MN | 46.37444 | -96.658  | 10,411.8 | 5/13/1974  | 11/6/2006  | 235  | 1.475 | 1.230 | 1,225,503  | 2,877,840  | 87,016    |
| 05051522   | RED RIVER OF THE NORTH AT HICKSON, ND            | 9020104 | ND | 46.65953 | -96.7974 | 11,137.0 | 11/3/1975  | 5/12/2004  | 104  | 1.368 | 1.300 | 1,026,235  | 3,230,260  | 90,728    |
| 05053000   | WILD RICE RIVER NR ABERCROMBIE, ND               | 9020105 | ND | 46.46758 | -96.7837 | 5,387.2  | 6/1/1994   | 11/6/2006  | 15   | 1.357 | 1.370 |            |            |           |
| 05053800   | RED RIVER OF THE NORTH ABOVE FARGO, ND           | 9020104 | ND | 46.80385 | -96.7968 | 14,660.2 | 4/4/1994   | 5/12/2004  | 43   | 1.419 | 0.928 | 1,274,734  | 7,124,520  | 295,859   |
| 05054000   | RED RIVER OF THE NORTH AT FARGO, ND              | 9020104 | ND | 46.86106 | -96.7837 | 17,612.0 | 5/8/2003   | 8/23/2005  | 30   | 0.893 | 0.896 | 1,793,033  | 7,157,404  | 282,236   |
| 05056000   | SHEYENNE RIVER NR WARWICK, ND                    | 9020203 | ND | 47.80515 | -98.7165 | 5,361.3  | 7/14/1993  | 10/3/2006  | 31   | 1.367 | 1.275 | 212,082    | 481,773    | 18,329    |
| 05057000   | SHEYENNE RIVER NR COOPERSTOWN, ND                | 9020203 | ND | 47.43274 | -98.0277 | 16,757.3 | 3/6/1979   | 8/22/2005  | 82   | 1.597 | 1.500 | 537,820    | 1,388,285  | 66,091    |
| 05057200   | BALDHILL CREEK NR DAZEY, ND                      | 9020203 | ND | 47.22916 | -98.1249 | 1,789.7  | 3/21/1979  | 8/8/1995   | 48   | 1.542 | 1.425 | 131,850    | 199,414    | 13,216    |
| 05058000   | SHEYENNE RIVER BELOW BALDHILL DAM, ND            | 9020204 | ND | 47.03367 | -98.0832 | 19,347.3 | 3/21/1979  | 8/22/2005  | 44   | 1.836 | 1.770 | 499,482    | 1,253,574  | 50,991    |
| 05058700   | SHEYENNE RIVER AT LISBON, ND                     | 9020204 | ND | 46.44673 | -97.6795 | 21,212.1 | 2/9/1993   | 5/10/2005  | 29   | 1.398 | 1.340 | 754,453    | 1,971,290  | 86,852    |
| 05059000   | SHEYENNE RIVER NEAR KINDRED, ND                  | 9020204 | ND | 46.62888 | -97.0042 | 22,792.0 | 7/27/1976  | 11/6/2006  | 231  | 1.351 | 1.223 | 673,895    | 2,843,764  | 51,400    |
| 05062500   | WILD RICE RIVER AT TWIN VALLEY, MN               | 9020108 | MN | 47.26558 | -96.2473 | 2,419.1  | 9/24/1974  | 4/30/1997  | 177  | 1.228 | 0.960 | 656,722    | 771,068    | 37,181    |
| 05064000   | WILD RICE RIVER AT HENDRUM, MN                   | 9020108 | MN | 47.26754 | -96.7979 | 4,040.4  | 4/6/1976   | 5/12/2004  | 115  | 1.127 | 0.885 | 993,378    | 2,171,633  | 278,152   |
| 05064500   | RED RIVER OF THE NORTH AT HALSTAD, MN            | 9020107 | ND | 47.35182 | -96.8439 | 56,462.0 | 1/27/1978  | 8/23/2005  | 122  | 2.204 | 1.800 | 7,049,961  | 18,610,865 | 837,426   |
| 05064900   | BEAVER CREEK NR FINLEY, ND                       | 9020109 | ND | 47.59452 | -97.7094 | 414.4    | 2/24/1981  | 8/5/1996   | 50   | 2.020 | 1.625 | 51,721     | 248,184    | 7,110     |
| 05076000   | THIEF RIVER NEAR THIEF RIVER FALLS, MN           | 9020304 | MN | 48.18555 | -96.1701 | 2,551.2  | 11/2/1992  | 8/17/2006  | 27   | 2.123 | 1.550 | 1,289,869  | 233,032    | 266,549   |
| 05079000   | RED LAKE RIVER AT CROOKSTON, MN                  | 9020303 | MN | 47.77596 | -96.6099 | 13,649.3 | 11/15/1974 | 5/11/2005  | 158  | 1.304 | 1.060 | 2,077,298  | 2,427,927  | 168,981   |
| 05082500   | RED RIVER OF THE NORTH AT GRAND FORKS, ND        | 9020301 | ND | 47.92705 | -97.0287 | 77,959.0 | 2/8/1993   | 8/15/2005  | 60   | 1.326 | 1.150 | 7,122,290  | 24,682,490 | 614,907   |
| 05082625   | TURTLE R AT TURTLE R STATE PARK NR ARVILLA, ND   | 9020307 | ND | 47.93195 | -97.5148 | 805.5    | 2/8/1993   | 8/10/2000  | 83   | 1.343 | 1.139 | 82,163     | 161,984    | 7,866     |
| 05083500   | RED RIVER OF THE NORTH AT OSLO, MN               | 9020306 | ND | 48.19419 | -97.1411 | 80,808.0 | 3/15/1973  | 5/12/2004  | 53   | 1.831 | 1.600 | 7,816,398  | 25,678,431 | 2,578,141 |
| 05085000   | FOREST RIVER AT MINTO, ND                        | 9020308 | ND | 48.28611 | -97.3679 | 1,916.6  | 4/20/1998  | 8/15/2005  | 21   | 1.587 | 1.435 |            |            |           |
| 05090000   | PARK RIVER AT GRAFTON, ND                        | 9020310 | ND | 48.4247  | -97.412  | 1,800.1  | 4/24/1998  | 8/15/2005  | 17   | 1.528 | 1.325 |            |            |           |
| 05099400   | LITTLE SOUTH PEMBINA RIVER NR WALHALLA, ND       | 9020313 | ND | 48.86517 | -98.0068 | 471.4    | 4/1/1976   | 9/26/1979  | 51   | 1.539 | 0.830 | 343,723    | 242,717    | 52,078    |
| 05116500   | DES LACS RIVER AT FOXHOLM, ND                    | 9010002 | ND | 48.3705  | -101.57  | 2,432.0  | 11/5/1981  | 9/18/2006  | 29   | 1.849 | 1.570 | 29,840     | 108,423    | 3,719     |
| 05124480   | KAWISHIWI RIVER NEAR ELY, MN                     | 9030001 | MN | 47.92327 | -91.5342 | 657.9    | 3/16/1976  | 5/15/2001  | 68   | 0.543 | 0.470 | 74,974     | 94,077     | 7,992     |
| 052        | MISSISSIPPI R SHIELY CO. DOCK, GREY CLOUD ISLAND | 7010206 | MN | 44.80278 | -93.0139 | 90,034.4 | 3/7/1975   | 9/15/1994  | 263  | 3.995 | 3.535 | 66,297,372 | 84,033,154 | 2,513,626 |
| 05267000   | MISSISSIPPI RIVER NEAR ROYALTON, MN              | 7010201 | MN | 45.82612 | -94.3566 | 30,044.0 | 1/22/1975  | 8/5/1998   | 169  | 0.944 | 0.850 | 5,290,842  | 5,175,290  | 197,270   |
| 05280000   | CROW RIVER AT ROCKFORD, MN                       | 7010204 | MN | 45.08659 | -93.7341 | 6,837.6  | 10/17/1972 | 8/3/2006   | 122  | 3.235 | 2.500 | 6,897,255  | 8,558,005  | 434,255   |
| 05283500   | MISSISSIPPI RIVER AT ANOKA, MN                   | 7010206 | MN | 45.19163 | -93.3947 | 44,755.2 | 1/3/1973   | 8/6/1998   | 50   | 1.662 | 1.430 | 15,478,917 | 19,392,501 | 1,479,255 |
| 05286000   | RUM RIVER NEAR ST. FRANCIS, MN                   | 7010207 | MN | 45.32757 | -93.3727 | 3,522.4  | 10/19/1972 | 4/2/1997   | 50   | 1.241 | 1.130 | 929,167    | 1,423,834  | 59,921    |
| 05287890   | ELM CREEK NR CHAMPLIN, MN                        | 7010206 | MN | 45.1633  | -93.4365 | 222.7    | 2/26/1988  | 9/8/2005   | 192  | 1.415 | 1.220 | 90,169     | 99,492     | 5,735     |

Table\_S2\_TN

|          |                                                  |         |    |          |          |           |            |            |     |        |        |             |             |           |
|----------|--------------------------------------------------|---------|----|----------|----------|-----------|------------|------------|-----|--------|--------|-------------|-------------|-----------|
| 05288500 | MISSISSIPPI RIVER NEAR ANOKA, MN                 | 7010206 | MN | 45.12671 | -93.2964 | 49,469.0  | 10/4/1972  | 8/7/1998   | 27  | 1.423  | 1.210  | 12,568,412  | 21,212,641  | 943,095   |
| 05291000 | WHETSTONE RIVER NEAR BIG STONE CITY, SD          | 7020001 | SD | 45.29189 | -96.4872 | 1,030.8   | 3/25/1974  | 1/13/2004  | 25  | 1.426  | 1.060  |             |             |           |
| 05294000 | POMME DE TERRE RIVER AT APPLETON, MN             | 7020002 | MN | 45.20355 | -96.0195 | 2,344.0   | 9/28/1972  | 9/24/2007  | 239 | 1.941  | 1.718  | 629,696     | 1,600,587   | 34,307    |
| 05316500 | REDWOOD RIVER NEAR REDWOOD FALLS, MN             | 7020006 | MN | 44.52366 | -95.1717 | 1,629.1   | 6/20/1990  | 3/19/2007  | 38  | 7.199  | 6.020  | 3,518,193   | 1,749,996   | 423,223   |
| 05317000 | COTTONWOOD RIVER NEAR NEW ULM, MN                | 7020008 | MN | 44.29119 | -94.4405 | 3,367.0   | 8/23/1989  | 3/19/2007  | 60  | 13.204 | 13.185 | 19,514,672  | 5,275,736   | 2,924,614 |
| 05319500 | WATONWAN RIVER NEAR GARDEN CITY, MN              | 7020010 | MN | 44.0465  | -94.1948 | 2,204.1   | 9/14/1976  | 9/27/2007  | 248 | 6.313  | 5.100  | 8,469,064   | 4,033,280   | 467,862   |
| 05320270 | LITTLE COBB RIVER NEAR BEAUFORD, MN              | 7020011 | MN | 43.99641 | -93.9087 | 336.7     | 4/24/1996  | 9/7/2005   | 98  | 8.553  | 8.855  | 1,289,429   | 799,732     | 124,842   |
| 05322000 | BLUE EARTH RIVER AT MOUTH AT MANKATO, MN         | 7020007 | MN | 44.1633  | -94.0369 | 9,056.9   | 10/6/1970  | 9/4/2001   | 385 | 7.777  | 7.170  | 43,554,488  | 21,062,357  | 3,306,825 |
| 05325000 | MINNESOTA RIVER AT MANKATO, MN                   | 7020007 | MN | 44.16966 | -94.0031 | 38,591.0  | 3/4/1994   | 7/20/1994  | 8   | 5.333  | 5.800  |             |             |           |
| 05330000 | MINNESOTA RIVER NEAR JORDAN, MN                  | 7020012 | MN | 44.69314 | -93.6419 | 41,958.0  | 11/21/1972 | 9/3/1998   | 233 | 5.627  | 4.900  | 57,973,318  | 57,504,892  | 4,797,526 |
| 05331000 | MISSISSIPPI RIVER AT ST. PAUL, MN                | 7010206 | MN | 44.93309 | -93.1046 | 95,312.0  | 10/4/1972  | 9/15/1994  | 338 | 3.510  | 2.765  | 77,294,691  | 81,738,431  | 3,486,034 |
| 05331570 | MISSISSIPPI RIVER AT NININGER, MN                | 7010206 | MN | 44.77583 | -92.8984 | 95,830.0  | 1/31/1978  | 9/8/1995   | 90  | 3.893  | 3.300  | 71,119,779  | 84,079,816  | 5,112,865 |
| 05331580 | MISSISSIPPI RIVER BELOW L&D #2 AT HASTINGS, MN   | 7010206 | MN | 44.74663 | -92.8524 | 96,089.0  | 10/2/1995  | 8/13/2004  | 96  | 3.947  | 3.110  | 55,556,420  | 84,216,511  | 3,793,319 |
| 05333500 | ST. CROIX RIVER NEAR DANBURY, WI                 | 7030001 | WI | 46.07524 | -92.2477 | 4,092.2   | 10/23/1975 | 11/16/2004 | 120 | 0.467  | 0.450  | 597,852     | 773,041     | 22,837    |
| 05338500 | SNAKE RIVER NEAR PINE CITY, MN                   | 7030004 | MN | 45.84057 | -92.9319 | 2,522.7   | 9/29/1971  | 11/21/2005 | 90  | 1.260  | 1.190  | 622,214     | 874,811     | 32,841    |
| 05340500 | ST. CROIX RIVER AT ST. CROIX FALLS, WI           | 7030005 | MN | 45.40688 | -92.6482 | 16,161.6  | 10/2/1974  | 5/8/2007   | 191 | 0.798  | 0.730  | 3,756,772   | 4,715,978   | 156,631   |
| 05355200 | CANNON RIVER AT WELCH, MN                        | 7040002 | MN | 44.5645  | -92.7316 | 3,470.6   | 10/30/1991 | 8/21/2007  | 30  | 5.037  | 4.900  | 4,598,767   | 5,808,287   | 205,338   |
| 05367500 | RED CEDAR RIVER NEAR COLFAX, WI                  | 7050007 | WI | 45.05308 | -91.7119 | 2,823.1   | 6/7/1990   | 10/15/2003 | 7   | 1.737  | 1.920  |             |             |           |
| 05368000 | HAY RIVER AT WHEELER, WI                         | 7050007 | WI | 45.04785 | -91.9111 | 1,082.6   | 6/7/1990   | 10/17/2002 | 7   | 2.213  | 2.230  |             |             |           |
| 05369500 | CHIPPEWA RIVER AT DURAND, WI                     | 7050005 | WI | 44.62891 | -91.9702 | 23,335.9  | 10/2/1974  | 9/5/2007   | 324 | 1.353  | 1.300  | 9,448,735   | 9,731,797   | 206,501   |
| 05378183 | JOOS VALLEY CREEK NEAR FOUNTAIN CITY, WI         | 7040003 | WI | 44.21479 | -91.6651 | 15.3      | 10/8/2002  | 9/30/2007  | 175 | 1.466  | 1.460  | 5,051       | 18,661      | 0         |
| 05378185 | EAGLE CK AT CT HIGHWAY G NEAR FOUNTAIN CITY, WI  | 7040003 | WI | 44.2094  | -91.6784 | 37.0      |            |            |     |        |        |             |             |           |
| 05378500 | MISSISSIPPI RIVER AT WINONA, MN                  | 7040003 | MN | 44.05672 | -91.6367 | 153,328.0 | 11/7/1974  | 8/20/1986  | 83  | 2.187  | 2.050  | 89,632,662  | 112,067,420 | 6,234,739 |
| 05379500 | TREMPEALEAU RIVER AT DODGE, WI                   | 7040005 | WI | 44.1316  | -91.5531 | 1,665.4   | 5/24/1978  | 9/18/2007  | 104 | 2.620  | 2.520  | 1,262,910   | 1,571,028   | 36,476    |
| 05382000 | BLACK RIVER NEAR GALESVILLE, WI                  | 7040007 | WI | 44.06063 | -91.2872 | 5,387.2   | 10/6/1970  | 9/18/2007  | 263 | 1.375  | 1.262  | 2,400,693   | 3,591,524   | 87,739    |
| 05388250 | Upper Iowa River near Dorchester, IA             | 7060002 | IA | 43.42111 | -91.5088 | 1,994.3   | 10/15/1998 | 9/12/2007  | 105 | 5.680  | 5.400  | 4,840,980   | 3,471,979   | 262,995   |
| 054      | MISSISSIPPI RIVER AT BR ON MN-25 AT MONTICELLO   | 7010203 | MN | 45.30886 | -93.7919 | 34,018.7  | 9/30/1988  | 9/7/1994   | 55  | 1.268  | 1.200  | 7,618,599   | 9,649,688   | 335,791   |
| 05401050 | TENMILE CREEK NEAR NEKOOSA, WI                   | 7070003 | WI | 44.26262 | -89.8106 | 189.8     | 11/15/1973 | 10/17/2002 | 43  | 3.220  | 3.500  | 252,784     | 218,198     | 17,723    |
| 05405000 | BARABOO RIVER NEAR BARABOO, WI                   | 7070004 | WI | 43.48174 | -89.6365 | 1,577.3   | 8/6/2001   | 9/17/2007  | 67  | 2.179  | 2.085  | 964,230     | 1,581,511   | 44,072    |
| 05406491 | GARFOOT CREEK NEAR CROSS PLAINS, WI              | 7070005 | WI | 43.10998 | -89.6794 | 14.0      | 10/16/1984 | 5/22/1991  | 73  | 4.181  | 3.445  | 14,985      | 9,449       | 945       |
| 05406500 | BLACK EARTH CREEK AT BLACK EARTH, WI             | 7070005 | WI | 43.13388 | -89.7325 | 118.1     | 4/28/1976  | 10/13/2002 | 62  | 3.470  | 3.180  | 159,548     | 104,122     | 18,065    |
| 05407000 | WISCONSIN RIVER AT MUSCODA, WI                   | 7070005 | WI | 43.1995  | -90.4433 | 26,936.0  | 10/24/1974 | 9/17/2007  | 221 | 1.445  | 1.400  | 12,571,998  | 23,116,104  | 343,386   |
| 05407500 | KICKAPOO RIVER AT ONTARIO, WI                    | 7070006 | WI | 43.71476 | -90.5869 | 388.5     | 1/17/1974  | 9/7/1977   | 44  | 1.224  | 1.080  | 137,995     | 417,523     | 15,785    |
| 05412500 | Turkey River at Garber, IA                       | 7060004 | IA | 42.73972 | -91.2616 | 4,001.6   | 10/30/1979 | 9/12/2007  | 150 | 6.891  | 6.250  | 10,185,345  | 7,662,893   | 405,493   |
| 05413500 | GRANT RIVER AT BURTON, WI                        | 7060003 | WI | 42.72037 | -90.8195 | 696.7     | 11/19/1986 | 10/16/2003 | 53  | 4.359  | 4.200  | 1,143,483   | 924,022     | 96,476    |
| 05418500 | Maquoketa River near Maquoketa, IA               | 7060006 | IA | 42.08363 | -90.6325 | 4,022.3   | 12/9/1970  | 6/5/2002   | 66  | 5.361  | 4.795  | 13,490,087  | 8,087,238   | 2,741,451 |
| 05418950 | APPLE RIVER NEAR ELIZABETH, IL                   | 7060005 | IL | 42.31862 | -90.2543 | 536.1     |            |            |     |        |        |             |             |           |
| 05420500 | Mississippi River at Clinton, IA                 | 7080101 | IL | 41.77928 | -90.2511 | 221,704.0 | 2/11/1974  | 9/7/2005   | 279 | 2.359  | 2.327  | 152,228,231 | 172,794,943 | 5,076,698 |
| 05420680 | Wapsipinicon River near Tripoli, IA              | 7080102 | IA | 42.83627 | -92.2571 | 896.1     | 4/18/1996  | 8/3/2004   | 73  | 5.894  | 5.224  | 2,969,160   | 2,317,584   | 431,381   |
| 05422000 | Wapsipinicon River near De Witt, IA              | 7080103 | IA | 41.76649 | -90.5347 | 6,050.2   | 11/25/1974 | 9/5/2007   | 156 | 6.544  | 6.546  | 17,425,917  | 14,978,090  | 903,339   |
| 05423000 | WEST BRANCH ROCK R NEAR WAUPUN, WI               | 7090001 | WI | 43.66803 | -88.6524 | 105.4     | 8/4/1998   | 6/28/2000  | 2   | 5.099  | 5.099  |             |             |           |
| 05423510 | WEST BRANCH ROCK R @ STATE HWY 49 NR WAUPUN, WI  | 7090001 | WI | 43.63383 | -88.6846 | 292.7     | 8/4/1998   | 10/14/2002 | 7   | 7.684  | 7.320  |             |             |           |
| 05424057 | ROCK RIVER AT HORICON, WI                        | 7090001 | WI | 43.4501  | -88.6323 | 1,181.0   | 8/31/1998  | 8/17/1999  | 33  | 5.019  | 5.020  | 3,074,343   | 1,285,613   | 213,123   |
| 05424082 | ROCK RIVER AT HUSTISFORD, WI                     | 7090001 | WI | 43.34537 | -88.598  | 1,323.5   | 4/6/1978   | 3/29/1979  | 28  | 2.223  | 1.780  | 457,550     | 1,287,647   | 30,328    |
| 05425500 | ROCK RIVER AT WATERTOWN, WI                      | 7090001 | WI | 43.18806 | -88.7265 | 2,509.7   | 9/1/1998   | 11/30/2004 | 68  | 3.001  | 3.031  | 1,793,669   | 2,474,472   | 69,851    |
| 05426000 | CRAWFISH RIVER AT MILFORD, WI                    | 7090002 | WI | 43.09992 | -88.8497 | 1,973.6   | 1/26/1977  | 10/14/2003 | 144 | 3.432  | 3.280  | 1,790,460   | 2,330,316   | 86,617    |
| 05427085 | ROCK RIVER AT ROBERT STREET AT FORT ATKINSON, WI | 7090001 | WI | 42.92751 | -88.8429 | 5,801.6   | 10/6/1998  | 10/14/2003 | 37  | 3.462  | 3.230  | 5,381,688   | 6,358,860   | 615,216   |
| 05427570 | ROCK RIVER AT INDIANFORD, WI                     | 7090001 | WI | 42.80392 | -89.0892 | 6,811.7   | 1/27/1977  | 8/17/1999  | 250 | 2.808  | 2.610  | 5,599,121   | 6,458,294   | 321,889   |
| 05430175 | YAHARA RIVER NEAR FULTON, WI                     | 7090001 | WI | 42.82649 | -89.1725 | 1,341.6   | 7/26/1977  | 10/14/2003 | 67  | 5.058  | 4.550  | 1,798,276   | 938,853     | 155,268   |
| 05430500 | ROCK RIVER AT AFTON, WI                          | 7090001 | WI | 42.60937 | -89.0704 | 8,650.6   | 10/28/1970 | 9/19/2007  | 268 | 3.507  | 3.400  | 7,896,048   | 7,823,759   | 208,437   |
| 05431486 | TURTLE CK AT CARVERS ROCK ROAD NEAR CLINTON, WI  | 7090001 | WI | 42.59752 | -88.829  | 515.4     | 9/2/1998   | 10/17/2002 | 39  | 8.818  | 8.065  | 1,015,170   | 747,406     | 86,191    |
| 05434500 | PECATONICA RIVER AT MARTINTOWN, WI               | 7090003 | WI | 42.50961 | -89.7993 | 2,678.1   | 12/8/1970  | 9/18/2007  | 93  | 5.164  | 5.235  | 4,848,288   | 3,741,782   | 185,229   |
| 05435500 | PECATONICA RIVER AT FREEPORT, IL                 | 7090003 | IL | 42.30304 | -89.619  | 3,434.3   | 1/2/1980   | 1/2/1980   | 1   | 4.900  | 4.900  |             |             |           |
| 05435800 | PECATONICA RIVER AT HARRISON, IL                 | 7090003 | IL | 42.42751 | -89.1957 | 4,630.9   | 5/23/1984  | 8/8/1984   | 2   | 6.345  | 6.345  |             |             |           |
| 05437500 | ROCK RIVER AT ROCKTON, IL                        | 7090005 | IL | 42.44956 | -89.0697 | 16,480.2  | 6/6/1979   | 8/18/1999  | 208 | 5.471  | 5.375  | 28,129,748  | 19,539,017  | 935,792   |
| 05438250 | COON CREEK AT RILEY, IL                          | 7090006 | IL | 42.1828  | -88.6413 | 220.4     | 8/11/1983  | 1/25/1984  | 5   | 5.187  | 4.715  |             |             |           |
| 05438600 | KISHWAUKEE R AB SOUTH BRANCH NR PERRYVILLE, IL   | 7090006 | IL | 42.2018  | -88.9792 | 1,696.5   | 8/24/1983  | 2/22/1984  | 5   | 4.365  | 3.230  |             |             |           |
| 05439500 | SOUTH BRANCH KISHWAUKEE RIVER NR FAIRDALE IL     | 7090006 | IL | 42.11032 | -88.9008 | 1,002.3   | 8/11/1983  | 10/24/1983 | 4   | 5.567  | 5.500  |             |             |           |
| 05440000 | KISHWAUKEE RIVER NEAR PERRYVILLE, IL             | 7090006 | IL | 42.19379 | -89.0002 | 2,846.4   | 8/24/1983  | 8/16/1984  | 8   | 5.404  | 5.580  |             |             |           |
| 05440700 | ROCK RIVER AT BYRON, IL                          | 7090005 | IL | 42.12273 | -89.2557 | 19,456.8  | 5/24/1979  | 12/16/1998 | 175 | 5.522  | 5.300  | 30,692,599  | 27,537,115  | 649,446   |



Table\_S2\_TN

|           |                                                    |         |    |          |          |           |            |            |     |        |        |             |             |            |
|-----------|----------------------------------------------------|---------|----|----------|----------|-----------|------------|------------|-----|--------|--------|-------------|-------------|------------|
| 05442200  | ROCK RIVER AT GRAND DETOUR, IL                     | 7090005 | IL | 41.88998 | -89.4206 | 22,020.2  | 6/5/1979   | 12/16/1998 | 158 | 5.654  | 5.400  | 36,295,039  | 29,580,945  | 745,430    |
| 05443500  | ROCK RIVER AT COMO, IL                             | 7090005 | IL | 41.78184 | -89.7504 | 22,670.3  | 4/10/1979  | 12/16/1998 | 161 | 5.515  | 5.300  | 37,333,510  | 29,594,642  | 851,452    |
| 05444000  | ELKHORN CREEK NEAR PENROSE, IL                     | 7090005 | IL | 41.90255 | -89.6967 | 378.1     | 6/5/1985   | 9/2/1998   | 4   | 9.848  | 9.400  |             |             |            |
| 05446500  | ROCK RIVER NEAR JOSLIN, IL                         | 7090005 | IL | 41.55601 | -90.1853 | 24,731.9  | 11/13/1974 | 12/16/1998 | 232 | 4.981  | 4.800  | 43,213,306  | 33,638,066  | 1,642,484  |
| 05447500  | GREEN RIVER NEAR GENESEO, IL                       | 7090007 | IL | 41.48886 | -90.1578 | 2,597.8   | 3/5/1980   | 12/16/1998 | 167 | 5.136  | 4.850  | 4,625,512   | 5,593,101   | 194,532    |
| 05449500  | Iowa River near Rowan, IA                          | 7080207 | IA | 42.75993 | -93.6223 | 1,082.6   | 3/28/1983  | 11/7/2006  | 173 | 7.569  | 6.900  | 4,306,140   | 2,814,492   | 229,745    |
| 05451210  | South Fork Iowa River NE of New Providence, IA     | 7080207 | IA | 42.31483 | -93.1524 | 580.2     | 3/19/1996  | 6/2/2005   | 104 | 10.054 | 10.564 | 4,504,271   | 2,662,902   | 614,521    |
| 05453100  | Iowa River at Marengo, IA                          | 7080208 | IA | 41.81218 | -92.0643 | 7,236.5   | 11/26/1974 | 9/4/1998   | 44  | 7.214  | 7.585  | 17,814,157  | 18,379,049  | 1,662,235  |
| 05455100  | Old Mans Creek near Iowa City, IA                  | 7080209 | IA | 41.60642 | -91.6157 | 520.6     | 6/14/1995  | 9/4/2007   | 127 | 7.095  | 6.680  | 1,931,390   | 953,686     | 216,936    |
| 05458000  | Little Cedar River near Ionia, IA                  | 7080201 | IA | 43.03352 | -92.5037 | 792.5     | 4/19/2001  | 12/8/2004  | 52  | 7.878  | 4.715  | 2,479,055   | 2,339,878   | 316,399    |
| 05458900  | West Fork Cedar River at Finchford, IA             | 7080204 | IA | 42.62936 | -92.5432 | 2,191.1   | 1/12/1978  | 9/4/2007   | 274 | 6.686  | 6.350  | 9,530,426   | 5,390,540   | 496,718    |
| 05463050  | Cedar River at Cedar Falls, IA                     | 7080205 | IA | 42.53935 | -92.4497 | 12,261.1  | 7/22/1975  | 9/4/2007   | 198 | 6.221  | 5.750  | 35,003,486  | 31,343,258  | 1,716,289  |
| 05464020  | Cedar River at Gilbertville, IA                    | 7080205 | IA | 42.41582 | -92.2188 | 13,571.6  | 10/6/1970  | 9/4/2007   | 206 | 6.687  | 6.310  | 40,681,940  | 34,184,896  | 1,417,382  |
| 05464220  | Wolf Creek near Dysart, IA                         | 7080205 | IA | 42.2517  | -92.2988 | 774.4     | 3/21/1996  | 5/24/2004  | 56  | 9.625  | 10.000 | 1,400,470   | 1,536,475   | 218,333    |
| 05464760  | Cedar River near Bertram, IA                       | 7080206 | IA | 41.92572 | -91.5502 | 18,013.5  | 7/22/1975  | 9/5/2007   | 193 | 7.532  | 7.300  | 46,220,984  | 41,228,792  | 2,051,776  |
| 05465500  | Iowa River at Wapello, IA                          | 7080209 | IA | 41.17835 | -91.181  | 32,375.0  | 11/1/1983  | 9/1/2005   | 196 | 6.759  | 6.500  | 71,554,442  | 70,612,572  | 3,078,699  |
| 05466500  | EDWARDS RIVER NEAR NEW BOSTON, IL                  | 7080104 | IL | 41.18696 | -90.9676 | 1,152.6   |            |            |     |        |        |             |             |            |
| 05469000  | HENDERSON CREEK NEAR OQUAWKA, IL                   | 7080104 | IL | 41.00188 | -90.8543 | 1,118.9   | 8/30/1978  | 4/4/1979   | 3   | 6.767  | 5.300  |             |             |            |
| 05471500  | South Skunk River near Oskaloosa, IA               | 7080105 | IA | 41.35524 | -92.6571 | 4,234.7   | 10/11/1999 | 9/11/2007  | 94  | 7.768  | 6.890  | 15,567,627  | 8,801,156   | 2,054,478  |
| 05474000  | Skunk River at Augusta, IA                         | 7080107 | IA | 40.75317 | -91.2761 | 11,168.1  | 1/31/1978  | 9/7/2005   | 193 | 6.362  | 6.370  | 22,983,187  | 19,943,203  | 2,221,234  |
| 05474500  | Mississippi River at Keokuk, IA                    | 7080104 | IL | 40.39247 | -91.3718 | 308,210.0 | 3/17/1975  | 7/22/1999  | 138 | 3.551  | 3.560  | 309,898,256 | 326,532,187 | 24,311,408 |
| 05476000  | DES MOINES RIVER AT JACKSON, MN                    | 7100002 | MN | 43.61937 | -94.9843 | 3,237.5   | 10/12/1972 | 6/29/1976  | 20  | 3.874  | 3.100  |             |             |            |
| 05481650  | Des Moines River near Saylorville, IA              | 7100004 | IA | 41.68033 | -93.6688 | 15,128.2  | 7/14/1975  | 9/6/2007   | 126 | 6.915  | 6.970  | 40,997,273  | 28,308,009  | 3,486,005  |
| 05484500  | Raccoon River at Van Meter, IA                     | 7100006 | IA | 41.53414 | -93.9499 | 8,912.2   | 7/14/1975  | 9/6/2007   | 278 | 7.887  | 7.700  | 30,097,735  | 22,699,689  | 2,021,191  |
| 05486000  | North River near Norwalk, IA                       | 7100008 | IA | 41.45784 | -93.655  | 903.9     | 5/4/1975   | 9/6/2007   | 253 | 5.298  | 4.900  | 1,630,697   | 1,172,338   | 133,040    |
| 05490600  | Des Moines River at St. Francisville, MO           | 7100009 | IA | 40.46211 | -91.5671 | 37,037.0  | 10/19/1970 | 11/2/2006  | 274 | 5.416  | 5.100  | 68,149,107  | 62,953,615  | 4,507,982  |
| 05495000  | Fox River at Wayland, MO                           | 7110001 | MO | 40.39215 | -91.5981 | 1,036.0   | 10/19/1970 | 9/7/2005   | 57  | 1.663  | 1.090  | 892,330     | 1,153,492   | 210,996    |
| 05495500  | BEAR CREEK NEAR MARCELLINE, IL                     | 7110001 | IL | 40.14358 | -91.3415 | 903.9     | 5/17/1978  | 9/11/1998  | 9   | 2.645  | 2.400  |             |             |            |
| 05500000  | South Fabius River near Taylor, MO                 | 7110003 | MO | 39.89678 | -91.5799 | 1,605.8   | 7/18/1972  | 9/7/2005   | 152 | 1.554  | 1.310  | 1,024,384   | 1,647,636   | 89,355     |
| 05514500  | Cuivre River near Troy, MO                         | 7110008 | MO | 39.00937 | -90.9764 | 2,338.8   | 7/19/1972  | 9/7/2005   | 113 | 1.730  | 1.400  | 2,070,048   | 2,993,562   | 196,697    |
| 05518000  | KANKAKEE RIVER AT SHELBY, IN                       | 7120001 | IN | 41.18248 | -87.3435 | 4,607.6   | 1/6/1976   | 2/15/2006  | 292 | 2.507  | 2.050  | 4,852,586   | 9,163,068   | 202,785    |
| 05520500  | KANKAKEE RIVER AT MOMENCE, IL                      | 7120001 | IL | 41.15944 | -87.6682 | 5,941.5   | 9/18/1979  | 2/21/2001  | 223 | 2.562  | 2.100  | 5,828,965   | 12,219,545  | 351,374    |
| 05525000  | IROQUOIS RIVER AT IROQUOIS, IL                     | 7120002 | IL | 40.82321 | -87.5818 | 1,776.7   | 8/2/1978   | 7/10/1987  | 7   | 2.786  | 2.100  |             |             |            |
| 05525500  | SUGAR CREEK AT MILFORD, IL                         | 7120002 | IL | 40.63164 | -87.7243 | 1,155.1   | 8/2/1978   | 12/15/2004 | 80  | 7.106  | 6.941  | 5,891,345   | 2,565,899   | 816,991    |
| 05526000  | IROQUOIS RIVER NEAR CHEBANSE, IL                   | 7120002 | IL | 41.00908 | -87.8253 | 5,415.7   | 12/5/1979  | 2/21/2001  | 93  | 7.517  | 7.700  | 25,660,142  | 15,009,744  | 3,551,256  |
| 05527500  | KANKAKEE RIVER NEAR WILMINGTON, IL                 | 7120001 | IL | 41.34607 | -88.1881 | 13,338.5  | 12/14/1977 | 12/2/1998  | 204 | 4.409  | 4.100  | 30,904,139  | 32,021,261  | 1,288,347  |
| 05527800  | DES PLAINES RIVER AT RUSSELL, IL                   | 7120004 | IL | 42.48755 | -87.9255 | 318.6     | 8/12/1981  | 8/9/2001   | 42  | 3.568  | 3.321  | 324,724     | 594,333     | 31,560     |
| 05528000  | DES PLAINES RIVER NEAR GURNEE, IL                  | 7120004 | IL | 42.34398 | -87.9406 | 600.9     | 12/20/1977 | 2/8/1984   | 39  | 6.968  | 6.430  | 1,169,143   | 1,111,526   | 55,406     |
| 05529000  | DES PLAINES RIVER NEAR DES PLAINES, IL             | 7120004 | IL | 42.08194 | -87.8903 | 932.4     | 8/12/1981  | 7/27/1988  | 4   | 5.730  | 5.250  |             |             |            |
| 05530590  | DES PLAINES RIVER NEAR SCHILLER PARK, IL           | 7120004 | IL | 41.95333 | -87.8546 | 1,150.0   | 10/15/1979 | 11/30/1998 | 176 | 6.164  | 5.800  | 2,198,048   | 2,240,312   | 59,760     |
| 05531500  | SALT CREEK AT WESTERN SPRINGS, IL                  | 7120004 | IL | 41.82604 | -87.9    | 297.9     | 11/15/1979 | 8/17/2005  | 272 | 8.858  | 8.326  | 1,020,935   | 856,599     | 25,360     |
| 05532500  | DES PLAINES RIVER AT RIVERSIDE, IL                 | 7120004 | IL | 41.82278 | -87.8201 | 1,631.7   | 4/9/1987   | 8/18/2004  | 189 | 6.365  | 6.004  | 3,391,861   | 3,327,751   | 96,191     |
| 05534050  | DES PLAINES RIVER AT LOCKPORT, IL                  | 7120004 | IL | 41.59642 | -88.0686 | 1,813.0   | 8/13/1981  | 10/12/1995 | 32  | 6.171  | 5.400  | 3,839,993   | 15,170,819  | 317,797    |
| 05536195  | LITTLE CALUMET RIVER AT MUNSTER, IND.              | 7120003 | IN | 41.57715 | -87.5223 | 233.1     | 1/13/1971  | 2/6/2006   | 390 | 5.567  | 5.100  | 290,552     | 222,916     | 11,788     |
| 05536995  | CHICAGO SANITARY AND SHIP CANAL AT ROMEVILLE, IL   | 7120004 | IL | 41.64088 | -88.06   | 1,914.0   | 4/9/1987   | 2/21/2001  | 91  | 7.172  | 7.121  | 16,766,922  | 10,181,310  | 830,581    |
| 05539000  | HICKORY CREEK AT JOLIET, IL                        | 7120004 | IL | 41.51445 | -88.0741 | 278.4     | 8/13/1981  | 11/26/1984 | 8   | 4.052  | 4.150  |             |             |            |
| 05539900  | WEST BRANCH DU PAGE RIVER NEAR WEST CHICAGO, IL    | 7120004 | IL | 41.91086 | -88.1792 | 73.8      | 8/12/1981  | 7/29/1988  | 6   | 8.742  | 8.050  |             |             |            |
| 05540095  | WEST BRANCH DU PAGE RIVER NEAR WARRENVILLE, IL     | 7120004 | IL | 41.82189 | -88.1724 | 234.1     | 12/19/1977 | 2/7/1984   | 39  | 6.501  | 6.250  | 554,148     | 603,291     | 19,261     |
| 05540210  | EAST BRANCH DU PAGE RIVER AT ROUTE 34 AT LISLE, IL | 7120004 | IL | 41.80059 | -88.0815 | 133.1     | 8/13/1981  | 9/17/1997  | 8   | 8.440  | 8.300  |             |             |            |
| 05540290  | DU PAGE RIVER NEAR NAPERVILLE, IL                  | 7120004 | IL | 41.69003 | -88.1662 | 569.8     |            |            |     |        | 6.453  | 6.450       |             |            |
| 05540500  | DU PAGE RIVER AT SHOREWOOD, IL                     | 7120004 | IL | 41.5223  | -88.1932 | 839.2     | 8/13/1981  | 9/12/1990  | 51  | 8.342  | 8.100  | 2,882,749   | 2,351,167   | 102,421    |
| 05542000  | MAZON RIVER NEAR COAL CITY, IL                     | 7120005 | IL | 41.28711 | -88.3606 | 1,178.5   | 8/3/1988   | 9/12/1990  | 10  | 11.195 | 9.300  |             |             |            |
| 05543500  | ILLINOIS RIVER AT MARSEILLES, IL                   | 7120005 | IL | 41.3259  | -88.7181 | 21,390.8  | 11/13/1974 | 12/15/1998 | 287 | 6.001  | 6.000  | 50,939,066  | 67,140,287  | 1,771,681  |
| 055451345 | WHITE RIVER AT CENTER STREET AT LAKE GENEVA, WI    | 7120006 | WI | 42.59057 | -88.4337 | 75.1      |            |            |     |        |        |             |             |            |
| 05546700  | FOX RIVER NEAR CHANNEL LAKE, IL                    | 7120006 | IL | 42.47919 | -88.1783 | 2,255.9   | 3/14/1979  | 12/1/1998  | 189 | 3.466  | 3.160  | 2,051,983   | 2,013,632   | 56,182     |
| 05548280  | NIPPERSINK CREEK NEAR SPRING GROVE, IL             | 7120006 | IL | 42.44352 | -88.2472 | 497.3     | 3/14/1979  | 12/1/1998  | 185 | 4.228  | 4.000  | 552,749     | 609,010     | 12,449     |
| 05549600  | FOX RIVER AT BURTONS BRIDGE, IL                    | 7120006 | IL | 42.27948 | -88.2271 | 3,232.1   | 7/26/1979  | 12/17/1998 | 167 | 3.230  | 2.900  | 2,644,254   | 2,513,766   | 88,367     |
| 05550000  | FOX RIVER AT ALTONQUIN, IL                         | 7120006 | IL | 42.16596 | -88.2904 | 3,633.8   | 3/13/1979  | 12/7/1998  | 197 | 3.076  | 2.900  | 2,863,522   | 2,810,948   | 84,226     |
| 05551000  | FOX RIVER AT SOUTH ELGIN, IL                       | 7120007 | IL | 41.9962  | -88.2941 | 4,030.0   | 3/13/1979  | 12/7/1998  | 182 | 3.559  | 3.400  | 3,531,301   | 3,393,210   | 100,629    |
| 05551700  | BLACKBERRY CREEK NEAR YORKVILLE, IL                | 7120007 | IL | 41.67123 | -88.4462 | 181.8     | 2/6/1979   | 12/10/1998 | 182 | 4.066  | 3.800  | 223,053     | 417,496     | 9,288      |

Table\_S2\_TN

|          |                                                  |         |    |          |          |           |            |            |     |       |        |             |             |            |
|----------|--------------------------------------------------|---------|----|----------|----------|-----------|------------|------------|-----|-------|--------|-------------|-------------|------------|
| 05551995 | SOMONAUK CREEK AT SHERIDAN, IL                   | 7120007 | IL | 41.54361 | -88.6867 | 215.7     | 4/1/1981   | 12/10/1998 | 158 | 5.113 | 4.650  | 351,246     | 544,038     | 24,222     |
| 05552500 | FOX RIVER AT DAYTON, IL                          | 7120007 | IL | 41.38325 | -88.7909 | 6,843.4   | 4/25/1979  | 1/13/1998  | 207 | 4.933 | 4.600  | 9,682,444   | 11,005,089  | 354,950    |
| 05553500 | ILLINOIS RIVER AT OTTAWA, IL                     | 7130001 | IL | 41.34199 | -88.8467 | 28,357.9  | 4/11/1989  | 8/4/2004   | 101 | 5.834 | 5.956  | 72,746,226  | 78,468,104  | 3,110,969  |
| 05554490 | VERMILION RIVER AT MC DOWELL, IL                 | 7130002 | IL | 40.83059 | -88.5748 | 1,427.1   | 8/14/1978  | 8/11/1997  | 6   | 2.991 | 3.200  |             |             |            |
| 05555300 | VERMILION RIVER NEAR LEONORE, IL                 | 7130002 | IL | 41.20959 | -88.9373 | 3,240.1   | 4/16/1986  | 4/16/1986  | 1   | 9.400 | 9.400  |             |             |            |
| 05556200 | ILLINOIS RIVER AT HENNEPIN                       | 7130001 | IL | 41.25788 | -89.3488 | 33,143.2  | 4/12/1989  | 9/13/1990  | 11  | 6.245 | 6.200  |             |             |            |
| 05556500 | BIG BUREAU CREEK AT PRINCETON, IL                | 7130001 | IL | 41.36494 | -89.4976 | 507.6     | 6/24/1986  | 8/11/1997  | 2   | 7.359 | 7.359  |             |             |            |
| 05558995 | ILLINOIS RIVER AT LACON, IL                      | 7130001 | IL | 41.02504 | -89.4173 | 35,394.9  | 4/12/1989  | 9/13/1990  | 11  | 6.064 | 5.200  |             |             |            |
| 05559900 | ILLINOIS RIVER AT WATER COMPANY AT PEORIA, IL    | 7130001 | IL | 40.72493 | -89.5473 | 36,001.0  | 11/17/1970 | 12/15/1998 | 209 | 5.984 | 6.000  | 75,951,218  | 92,922,023  | 3,464,177  |
| 05563800 | ILLINOIS RIVER AT PEKIN, IL                      | 7130003 | IL | 40.57309 | -89.6548 | 36,555.1  | 10/14/1977 | 12/14/1998 | 180 | 5.833 | 5.800  | 78,205,238  | 66,214,555  | 2,111,223  |
| 05567510 | MACKINAW RIVER BELOW CONGERVILLE, IL             | 7130004 | IL | 40.58672 | -89.2785 | 2,009.8   |            |            |     |       |        |             |             |            |
| 05568005 | MACKINAW RIVER BELOW GREEN VALLEY, IL            | 7130004 | IL | 40.44754 | -89.6912 | 2,828.3   |            |            |     |       |        |             |             |            |
| 05568800 | INDIAN CREEK NEAR WYOMING, IL                    | 7130005 | IL | 41.01846 | -89.8359 | 162.4     | 10/18/1996 | 9/24/1998  | 29  | 8.973 | 8.621  | 607,719     | 403,446     | 57,829     |
| 05568915 | SPOON RIVER NEAR DAHINDA, IL                     | 7130005 | IL | 40.90791 | -90.0868 | 1,976.4   |            |            |     |       |        |             |             |            |
| 05569500 | SPOON RIVER AT LONDON MILLS, IL                  | 7130005 | IL | 40.70676 | -90.2829 | 2,776.5   | 8/31/1978  | 8/31/1978  | 1   | 1.400 | 1.400  |             |             |            |
| 05570000 | SPOON RIVER AT SEVILLE, IL                       | 7130005 | IL | 40.48497 | -90.3422 | 4,236.7   | 8/30/1978  | 8/13/1993  | 44  | 5.587 | 5.900  | 10,008,047  | 7,738,502   | 1,317,538  |
| 05570520 | ILLINOIS RIVER AT POWER COMPANY AT HAVANA, IL    | 7130003 | IL | 40.28032 | -90.0815 | 47,397.0  | 4/24/1978  | 11/21/1978 | 9   | 5.429 | 5.900  |             |             |            |
| 05570910 | SANGAMON RIVER AT FISHER, IL                     | 7130006 | IL | 40.31119 | -88.3227 | 621.6     | 1/17/1979  | 12/30/1998 | 186 | 8.224 | 9.110  | 3,320,301   | 1,278,570   | 297,136    |
| 05572000 | SANGAMON RIVER AT MONTICELLO, IL                 | 7130006 | IL | 40.02573 | -88.5891 | 1,424.5   | 5/14/1981  | 8/16/2005  | 113 | 7.382 | 7.663  | 4,909,010   | 3,037,949   | 446,662    |
| 05572125 | SANGAMON R AT ALLERTON PARK NEAR MONTICELLO, IL  | 7130006 | IL | 40.00226 | -88.6353 | 1,489.4   | 10/19/1978 | 12/21/1998 | 183 | 7.662 | 8.140  | 4,791,080   | 3,088,855   | 336,452    |
| 05573504 | SANGAMON R. AT L DECATUR WATER INTAKE AT DECATUR | 7130006 | IL | 39.82893 | -88.9597 | 2,403.6   | 10/10/1984 | 12/11/1998 | 119 | 5.803 | 6.500  | 5,843,956   | 4,151,311   | 596,320    |
| 05573540 | SANGAMON RIVER AT ROUTE 48 AT DECATUR, IL        | 7130006 | IL | 39.83094 | -88.9763 | 2,429.4   |            |            |     |       |        |             |             |            |
| 05573650 | SANGAMON RIVER NEAR NIANTIC, IL                  | 7130006 | IL | 39.79723 | -89.1054 | 2,737.8   | 7/22/1996  | 7/22/1996  | 1   | 8.156 | 8.200  |             |             |            |
| 05573800 | SANGAMON RIVER AT ROBY, IL                       | 7130006 | IL | 39.74227 | -89.3992 | 3,273.8   |            |            |     |       |        |             |             |            |
| 05575500 | SOUTH FORK SANGAMON RIVER AT KINCAID, IL         | 7130007 | IL | 39.57884 | -89.3925 | 1,455.6   | 10/13/1977 | 11/24/1998 | 191 | 5.504 | 5.400  | 1,822,643   | 2,781,984   | 81,663     |
| 05576022 | SOUTH FORK SANGAMON RIVER BELOW ROCHESTER, IL    | 7130007 | IL | 39.75411 | -89.5662 | 2,253.3   | 8/14/1978  | 9/27/1982  | 14  | 4.785 | 4.600  |             |             |            |
| 05576500 | SANGAMON RIVER AT RIVERTON, IL                   | 7130008 | IL | 39.84754 | -89.55   | 6,780.6   | 1/9/1986   | 12/2/1998  | 114 | 6.663 | 6.800  | 14,500,711  | 13,418,582  | 800,170    |
| 05577505 | SPRING CR AT BURNS LANE BRIDGE AT SPRINGFIELD,IL | 7130008 | IL | 39.82055 | -89.6877 | 282.3     | 7/23/1981  | 8/21/1996  | 2   | 1.525 | 1.525  |             |             |            |
| 05578000 | SANGAMON RIVER AT PETERSBURG, IL                 | 7130008 | IL | 40.01102 | -89.844  | 7,933.2   | 5/1/1978   | 8/27/1996  | 12  | 5.549 | 5.350  |             |             |            |
| 05578500 | SALT CREEK NEAR ROWELL, IL                       | 7130009 | IL | 40.11457 | -89.0505 | 867.7     | 8/15/1978  | 10/4/1982  | 15  | 4.953 | 4.600  |             |             |            |
| 05579500 | LAKE FORK NEAR CORNLAND, IL                      | 7130009 | IL | 39.95123 | -89.3841 | 554.3     | 6/7/1978   | 10/4/1982  | 15  | 6.879 | 7.350  |             |             |            |
| 05580000 | KICKAPOO CREEK AT WAYNEVILLE, IL                 | 7130009 | IL | 40.25517 | -89.1283 | 587.9     | 8/15/1978  | 8/14/1997  | 13  | 6.263 | 3.100  |             |             |            |
| 05580500 | KICKAPOO CREEK NEAR LINCOLN, IL                  | 7130009 | IL | 40.1864  | -89.3668 | 792.5     | 9/18/1978  | 10/5/1982  | 14  | 6.893 | 7.400  |             |             |            |
| 05582000 | SALT CREEK NEAR GREENVIEW, IL                    | 7130009 | IL | 40.13304 | -89.7367 | 4,672.4   | 5/1/1978   | 10/7/1982  | 19  | 5.712 | 6.400  |             |             |            |
| 05583000 | SANGAMON RIVER NEAR OAKFORD, IL                  | 7130008 | IL | 40.12302 | -89.9852 | 13,190.9  | 12/20/1977 | 11/30/1998 | 223 | 5.609 | 5.700  | 27,449,997  | 26,120,488  | 908,985    |
| 05584500 | LA MOINE RIVER AT COLMAR, IL                     | 7130010 | IL | 40.33088 | -90.896  | 1,696.5   | 2/17/1975  | 12/16/1998 | 357 | 4.965 | 5.300  | 3,971,357   | 2,712,370   | 319,641    |
| 05585000 | LA MOINE RIVER AT RIPLEY, IL                     | 7130010 | IL | 40.02384 | -90.6308 | 3,348.9   | 7/16/1975  | 12/14/1998 | 284 | 4.268 | 4.200  | 5,682,330   | 4,924,044   | 302,341    |
| 05586100 | ILLINOIS RIVER AT VALLEY CITY, IL                | 7130011 | IL | 39.70341 | -90.6462 | 69,267.0  | 12/12/1974 | 8/18/2005  | 371 | 5.452 | 5.500  | 121,688,706 | 113,278,137 | 3,126,464  |
| 05587000 | MACOUPIN CREEK NEAR KANE, IL                     | 7130012 | IL | 39.23422 | -90.3946 | 2,248.1   | 6/6/1978   | 8/7/1997   | 7   | 1.697 | 1.700  |             |             |            |
| 05587455 | MISSISSIPPI RIVER BELOW GRAFTON, IL              | 7110009 | IL | 38.95033 | -90.3715 | 443,667.0 | 5/4/1989   | 9/12/2005  | 183 | 3.897 | 3.875  | 479,811,492 | 532,032,940 | 16,028,600 |
| 05587900 | CAHOKIA CREEK AT EDWARDSVILLE, IL                | 7140101 | IL | 38.82447 | -89.975  | 549.1     | 6/12/1984  | 9/15/1998  | 6   | 1.644 | 1.250  |             |             |            |
| 05591200 | KASKASKIA RIVER AT COOKS MILLS, IL               | 7140201 | IL | 39.58315 | -88.4132 | 1,225.1   | 12/1/1977  | 12/3/1998  | 194 | 7.841 | 8.590  | 5,318,485   | 3,243,366   | 330,282    |
| 05591300 | KASKASKIA RIVER AT ALLENVILLE, IL                | 7140201 | IL | 39.57281 | -88.5322 | 1,310.5   | 1/16/1980  | 12/3/1998  | 174 | 7.793 | 9.300  | 5,719,742   | 3,380,958   | 366,809    |
| 05591400 | JONATHAN CREEK NEAR SULLIVAN, IL                 | 7140201 | IL | 39.60111 | -88.5461 | 141.7     | 3/3/1980   | 12/7/1998  | 154 | 8.902 | 10.000 | 612,134     | 356,300     | 59,225     |
| 05591700 | WEST OKAW RIVER NEAR LOVINGTON, IL               | 7140201 | IL | 39.73133 | -88.6623 | 290.1     | 4/7/1980   | 12/7/1998  | 153 | 9.576 | 10.300 | 1,390,984   | 693,300     | 82,398     |
| 05592000 | KASKASKIA RIVER AT SHELBYVILLE, IL               | 7140201 | IL | 39.39884 | -88.7881 | 2,729.9   | 10/31/1977 | 12/15/1998 | 197 | 4.898 | 4.480  | 4,246,542   | 4,500,772   | 187,891    |
| 05592100 | KASKASKIA RIVER NEAR COWDEN, IL                  | 7140201 | IL | 39.22962 | -88.8449 | 3,444.7   | 10/17/1977 | 12/21/1998 | 196 | 4.542 | 4.050  | 5,424,519   | 5,680,754   | 223,110    |
| 05592195 | BECK CREEK AT HERRICK, IL                        | 7140201 | IL | 39.21639 | -89.0206 | 251.2     | 7/25/1983  | 11/12/1998 | 4   | 2.223 | 1.835  |             |             |            |
| 05592500 | KASKASKIA RIVER AT VANDALIA, IL                  | 7140202 | IL | 38.95644 | -89.0877 | 5,024.6   | 12/12/1979 | 12/22/1998 | 178 | 3.915 | 2.950  | 7,330,351   | 7,662,662   | 363,124    |
| 05592600 | HICKORY CREEK NEAR BLUFF CITY, IL                | 7140202 | IL | 38.92525 | -89.0393 | 201.5     | 1/19/1989  | 12/22/1998 | 74  | 1.294 | 0.975  | 117,270     | 221,942     | 28,475     |
| 05592800 | HURRICANE CREEK NEAR MULBERRY GROVE, IL          | 7140202 | IL | 38.91851 | -89.2428 | 393.7     | 12/12/1979 | 12/22/1998 | 174 | 1.731 | 1.390  | 464,889     | 534,017     | 44,904     |
| 05592900 | EAST FORK KASKASKIA RIVER NEAR SANDOVAL, IL      | 7140202 | IL | 38.69236 | -89.0999 | 292.7     | 12/12/1979 | 12/17/1998 | 164 | 1.676 | 1.170  | 270,681     | 366,742     | 26,328     |
| 05592930 | NORTH FORK KASKASKIA RIVER NEAR PATOKA, IL       | 7140202 | IL | 38.77361 | -89.0861 | 101.3     | 1/19/1989  | 12/17/1998 | 74  | 2.039 | 1.590  | 75,800      | 107,353     | 14,291     |
| 05593010 | KASKASKIA RIVER BELOW CARLYLE, IL                | 7140202 | IL | 38.57449 | -89.3693 | 7,081.1   | 8/13/1979  | 12/15/1998 | 177 | 1.938 | 1.555  | 4,274,571   | 7,435,624   | 239,312    |
| 05593505 | CROOKED CREEK NEAR ODIN, IL                      | 7140202 | IL | 38.56389 | -89.0503 | 231.0     | 4/20/1982  | 11/14/1996 | 5   | 2.825 | 2.150  |             |             |            |
| 05594000 | SHOAL CREEK NEAR BREESE, IL                      | 7140203 | IL | 38.60959 | -89.4945 | 1,903.7   | 4/28/1982  | 11/21/1996 | 6   | 1.878 | 2.000  |             |             |            |
| 05594100 | KASKASKIA RIVER NEAR VENEDY STATION, IL          | 7140204 | IL | 38.44995 | -89.6298 | 11,377.9  | 11/12/1974 | 11/18/1998 | 232 | 2.191 | 1.850  | 8,983,397   | 13,617,597  | 427,609    |
| 05594450 | SILVER CREEK NEAR TROY, IL                       | 7140204 | IL | 38.7152  | -89.8304 | 398.9     | 4/21/1982  | 11/19/1996 | 5   | 2.870 | 3.100  |             |             |            |
| 05594800 | SILVER CREEK NEAR FREEBURG, IL                   | 7140204 | IL | 38.39653 | -89.873  | 1,201.8   | 4/27/1982  | 11/20/1996 | 6   | 3.500 | 3.300  |             |             |            |
| 05595200 | RICHLAND CREEK NEAR HECKER, IL                   | 7140204 | IL | 38.32375 | -89.9711 | 334.1     | 4/27/1982  | 11/20/1996 | 6   | 9.080 | 9.100  |             |             |            |

Table\_S2\_TN

|          |                                                   |         |    |          |          |           |            |            |     |        |        |             |             |           |
|----------|---------------------------------------------------|---------|----|----------|----------|-----------|------------|------------|-----|--------|--------|-------------|-------------|-----------|
| 05595700 | BIG MUDDY RIVER NEAR MT. VERNON, IL               | 7140106 | IL | 38.30935 | -88.9887 | 186.2     | 10/2/1985  | 12/2/1998  | 119 | 1.578  | 1.220  | 196,967     | 158,334     | 30,069    |
| 05595730 | RAYSE CREEK NEAR WALTONVILLE, IL                  | 7140106 | IL | 38.25381 | -89.0399 | 227.9     | 12/20/1979 | 12/2/1998  | 161 | 2.222  | 1.540  | 324,890     | 249,618     | 36,718    |
| 05595830 | CASEY FORK AT ROUTE 37 NEAR MT. VERNON, IL        | 7140106 | IL | 38.26947 | -88.8989 | 227.1     | 12/18/1979 | 12/2/1998  | 161 | 4.719  | 3.100  | 174,353     | 189,280     | 17,782    |
| 05597000 | BIG MUDDY RIVER AT PLUMFIELD, IL                  | 7140106 | IL | 37.90148 | -89.0143 | 2,056.5   | 11/17/1981 | 3/5/1996   | 6   | 1.294  | 1.200  |             |             |           |
| 05597500 | CRAB ORCHARD CREEK NEAR MARION, IL                | 7140106 | IL | 37.73092 | -88.8895 | 82.1      | 6/4/1979   | 3/6/1996   | 25  | 1.004  | 1.000  |             |             |           |
| 05599500 | BIG MUDDY RIVER AT MURPHYSBORO, IL                | 7140106 | IL | 37.74924 | -89.3471 | 5,617.7   | 11/11/1974 | 12/1/1998  | 229 | 1.491  | 1.400  | 2,797,891   | 4,995,011   | 155,676   |
| 07014500 | Meramec River near Sullivan, MO                   | 7140102 | MO | 38.15847 | -91.1086 | 3,820.3   | 10/22/1970 | 9/1/2005   | 200 | 0.427  | 0.389  | 777,228     | 1,957,528   | 79,384    |
| 07016400 | Bourbeuse River above Union, MO                   | 7140103 | MO | 38.432   | -91.0199 | 2,092.7   | 10/22/1970 | 9/7/2005   | 153 | 0.604  | 0.480  | 928,806     | 1,418,085   | 128,860   |
| 07018100 | Big River near Richwoods, MO                      | 7140104 | MO | 38.15988 | -90.7055 | 1,903.7   | 11/9/1992  | 9/1/2005   | 75  | 0.432  | 0.340  | 633,909     | 929,960     | 97,841    |
| 07019280 | Meramec River at Paulina Hills, MO                | 7140102 | MO | 38.46283 | -90.4148 | 10,152.8  | 10/22/1970 | 9/8/2005   | 198 | 0.776  | 0.755  | 3,354,755   | 5,952,507   | 201,955   |
| 090162   | SAGINAW R AT MIDLAND ST BR; BANGOR TWP, SEC 21    | 4080206 | MI | 43.60139 | -83.8919 | 15,845.6  | 1/29/1974  | 6/18/1996  | 113 | 2.942  | 2.700  | 11,228,510  | 16,254,027  | 549,546   |
| 093051   | CHIPPEWA R @ NSP HOLCOMBE DM TAILRACE             | 7050005 | WI | 45.22441 | -91.1281 | 11,923.6  | 2/10/1977  | 6/6/2001   | 148 | 0.805  | 0.770  | 2,876,410   | 2,808,313   | 115,700   |
| 10070001 | Beaver Creek near Cedar Falls                     | 7080205 | IA | 42.5732  | -92.5065 | 1,009.2   | 10/26/1998 | 9/4/2007   | 109 | 8.922  | 7.900  | 4,105,467   | 2,748,383   | 241,002   |
| 10070002 | Wolf Creek at La Porte City                       | 7080205 | IA | 42.3158  | -92.1936 | 847.6     | 6/5/2001   | 9/4/2007   | 86  | 9.438  | 8.700  | 1,938,002   | 1,690,519   | 150,421   |
| 10070004 | Black Hawk Creek at Waterloo                      | 7080205 | IA | 42.4695  | -92.4134 | 848.1     | 10/2/2001  | 9/4/2007   | 78  | 9.625  | 8.800  | 2,709,175   | 1,998,550   | 244,190   |
| 10090001 | Cedar River near Janesville                       | 7080201 | IA | 42.6496  | -92.4664 | 4,287.4   | 10/26/1998 | 9/10/2007  | 99  | 6.881  | 6.000  | 11,847,419  | 11,882,846  | 632,162   |
| 10120001 | Shell Rock River at Shell Rock                    | 7080202 | IA | 42.7116  | -92.5812 | 4,427.4   | 10/25/1999 | 9/10/2007  | 114 | 6.426  | 5.515  | 10,306,608  | 10,852,463  | 447,180   |
| 10160001 | Cedar River at Cedar Bluff                        | 7080206 | IA | 41.78801 | -91.3124 | 18,117.6  | 10/19/1999 | 7/5/2006   | 82  | 7.086  | 6.495  | 46,503,997  | 41,729,486  | 2,512,299 |
| 10170002 | Winnebago River Upstream of Mason City            | 7080203 | IA | 43.1929  | -93.2103 | 1,162.4   | 11/11/1999 | 9/10/2007  | 97  | 6.338  | 5.520  | 3,109,493   | 3,108,711   | 225,829   |
| 10170003 | Winnebago River Downstream of Mason City          | 7080203 | IA | 43.1257  | -93.1231 | 1,595.9   | 11/11/1999 | 9/10/2007  | 86  | 6.625  | 6.320  | 3,981,120   | 4,078,735   | 274,302   |
| 10220002 | Volga River near Elkport                          | 7060004 | IA | 42.7497  | -91.2766 | 1,042.7   | 10/7/1999  | 9/12/2007  | 100 | 6.062  | 5.210  | 1,836,345   | 1,662,577   | 100,396   |
| 10250001 | South Raccoon River near Redfield                 | 7100007 | IA | 41.5798  | -94.1827 | 2,512.2   | 10/20/1999 | 9/6/2007   | 100 | 6.144  | 4.760  | 5,695,934   | 5,179,142   | 661,608   |
| 103094   | BLACK RIVER                                       | 7040007 | WI | 44.57076 | -90.5952 | 1,717.2   | 3/30/1978  | 9/3/2003   | 148 | 1.457  | 1.245  | 995,962     | 1,817,754   | 87,277    |
| 10340001 | Cedar River near Charles City                     | 7080201 | IA | 43.00726 | -92.6029 | 2,833.8   | 1/12/1971  | 9/10/2007  | 317 | 6.940  | 6.470  | 8,424,711   | 7,854,614   | 386,326   |
| 10370001 | North Raccoon River near Jefferson                | 7100006 | IA | 42.0119  | -94.4286 | 4,091.6   | 10/20/1999 | 11/13/2006 | 90  | 10.234 | 9.760  | 19,416,412  | 11,407,053  | 1,917,760 |
| 10400001 | Boone River near Stratford                        | 7100005 | IA | 42.3411  | -93.892  | 2,286.1   | 10/18/1999 | 9/10/2007  | 90  | 9.661  | 9.550  | 13,029,519  | 5,776,260   | 2,072,635 |
| 10420001 | Iowa River near Gifford                           | 7080207 | IA | 42.3102  | -93.0755 | 2,039.0   | 10/7/1999  | 9/12/2007  | 92  | 7.838  | 7.015  | 6,042,843   | 5,785,759   | 591,338   |
| 10440001 | Cedar Creek near Oakland Mills                    | 7080107 | IA | 40.9254  | -91.6735 | 1,385.9   | 10/12/1998 | 9/4/2007   | 89  | 5.559  | 5.100  | 3,296,643   | 2,458,010   | 467,372   |
| 10460001 | West Fork Des Moines River near Humboldt          | 7100002 | IA | 42.6744  | -94.2069 | 5,926.7   | 6/5/1973   | 9/11/2007  | 119 | 6.123  | 6.100  | 15,309,076  | 9,189,744   | 1,015,373 |
| 10490001 | North Fork Maquoketa River near Hurstville        | 7060006 | IA | 42.09025 | -90.6723 | 1,527.3   | 10/13/1998 | 9/5/2007   | 107 | 7.950  | 7.500  | 3,674,899   | 2,696,566   | 151,866   |
| 10490002 | Maquoketa River near Maquoketa                    | 7060006 | IA | 42.0757  | -90.6823 | 2,470.8   | 10/19/1999 | 9/5/2007   | 95  | 7.505  | 7.090  | 6,186,821   | 5,117,451   | 309,609   |
| 10500001 | Indian Creek near Colfax                          | 7080105 | IA | 41.74621 | -93.2264 | 1,038.0   | 10/18/1999 | 9/12/2007  | 94  | 7.343  | 7.900  | 4,059,564   | 2,324,131   | 675,670   |
| 10520002 | Iowa River Upstream of Iowa City                  | 7080209 | IA | 41.6937  | -91.5466 | 8,122.5   | 11/30/1999 | 9/5/2007   | 86  | 6.508  | 6.470  | 13,762,050  | 17,899,139  | 1,362,674 |
| 10520003 | Iowa River Downstream of Iowa City                | 7080209 | IA | 41.5547  | -91.5186 | 8,565.0   | 11/30/1999 | 9/5/2007   | 86  | 6.699  | 6.495  | 16,065,670  | 18,574,352  | 1,470,360 |
| 10540001 | North Skunk River                                 | 7080106 | IA | 41.28387 | -92.2574 | 1,649.6   | 10/12/1998 | 9/11/2007  | 97  | 6.413  | 6.400  | 4,064,430   | 2,749,653   | 488,590   |
| 10550001 | East Fork of The Des Moines River near St. Joseph | 7100003 | IA | 42.95138 | -94.2335 | 2,432.9   | 10/12/1998 | 9/11/2007  | 107 | 8.274  | 8.700  | 12,351,056  | 4,995,018   | 1,047,974 |
| 10570002 | Cedar River Upstream of Cedar Rapids              | 7080205 | IA | 42.0692  | -91.7847 | 16,245.2  | 11/3/1999  | 9/5/2007   | 85  | 7.070  | 6.670  | 39,262,615  | 38,983,624  | 3,296,041 |
| 10630001 | Whitebreast Creek near Knoxville                  | 7100008 | IA | 41.3026  | -93.1713 | 917.6     | 10/26/1999 | 8/1/2007   | 77  | 2.260  | 1.800  | 720,382     | 804,404     | 125,820   |
| 10630002 | Cedar Creek near Bussey                           | 7100009 | IA | 41.2191  | -92.9077 | 965.0     | 10/25/1999 | 9/5/2007   | 97  | 2.224  | 1.115  | 871,687     | 931,172     | 129,987   |
| 10640002 | Iowa River Downstream of Marshalltown             | 7080208 | IA | 42.0508  | -92.8464 | 4,254.3   | 1/27/1976  | 9/12/2007  | 117 | 9.128  | 8.690  | 13,443,297  | 13,743,744  | 770,970   |
| 10640003 | Iowa River Upstream of Marshalltown               | 7080208 | IA | 42.0917  | -93.0002 | 3,817.6   | 10/11/1999 | 9/12/2007  | 84  | 9.040  | 8.050  | 12,173,955  | 12,962,473  | 1,103,467 |
| 10700001 | Cedar River near Conesville                       | 7080206 | IA | 41.4093  | -91.29   | 19,949.4  | 10/14/1999 | 9/4/2007   | 95  | 7.061  | 6.800  | 51,307,236  | 45,164,546  | 2,684,740 |
| 10770001 | Beaver Creek near Grimes                          | 7100004 | IA | 41.6883  | -93.7353 | 969.3     | 10/11/1999 | 9/6/2007   | 95  | 8.535  | 8.600  | 3,778,604   | 2,125,875   | 535,276   |
| 10770003 | Des Moines River Downstream of Des Moines         | 7100008 | IA | 41.4877  | -93.3384 | 29,882.3  | 11/15/1999 | 9/6/2007   | 86  | 7.926  | 7.850  | 55,980,259  | 59,988,418  | 4,092,720 |
| 10850003 | South Skunk River Upstream of Ames                | 7080105 | IA | 42.06631 | -93.6207 | 822.3     | 10/7/1999  | 9/12/2007  | 82  | 12.298 | 13.350 | 5,512,559   | 1,707,551   | 928,307   |
| 10900002 | Des Moines River Downstream of Ottumwa            | 7100009 | IA | 40.95677 | -92.34   | 34,441.8  | 11/2/1999  | 9/11/2007  | 86  | 6.555  | 6.450  | 54,153,986  | 60,820,395  | 3,767,212 |
| 10900003 | Des Moines River Upstream of Ottumwa              | 7100009 | IA | 41.0874  | -92.5258 | 33,982.4  | 11/2/1999  | 9/11/2007  | 84  | 6.639  | 6.600  | 53,926,040  | 60,400,495  | 3,677,836 |
| 10910001 | Middle River near Indianola                       | 7100008 | IA | 41.4247  | -93.5871 | 1,269.3   | 10/15/1998 | 9/6/2007   | 85  | 3.775  | 2.950  | 2,056,745   | 1,656,525   | 363,880   |
| 10940002 | Des Moines River Upstream of Fort Dodge           | 7100004 | IA | 42.5436  | -94.2163 | 9,531.0   | 10/19/1999 | 9/10/2007  | 85  | 7.451  | 7.400  | 33,487,955  | 17,211,299  | 3,012,123 |
| 123016   | Mississippi R. at LD 9                            | 7060001 | WI | 43.21167 | -91.1025 | 166,212.4 | 2/3/1977   | 9/4/2007   | 313 | 2.301  | 2.250  | 104,399,453 | 124,577,616 | 3,847,586 |
| 123017   | Kickapoo R. at Stueben                            | 7070006 | WI | 43.18214 | -90.8506 | 1,773.6   | 2/3/1977   | 9/20/2007  | 282 | 1.442  | 1.330  | 735,083     | 1,563,151   | 18,070    |
| 130001   | Maquoketa River                                   | 7060006 | IA | 42.18667 | -90.3106 | 4,818.0   | 5/5/1993   | 11/8/2005  | 279 | 7.006  | 6.551  | 11,086,312  | 9,057,292   | 464,063   |
| 130003   | APPLE RIVER NEAR HANOVER, IL                      | 7060005 | IL | 42.18718 | -90.236  | 657.4     | 5/3/1993   | 11/8/2005  | 237 | 4.247  | 4.182  | 1,123,465   | 819,109     | 75,618    |
| 130202   | BATTLE CREEK R @ 9 MILE RD; PENNFIELD TWP SEC 21  | 4050003 | MI | 42.36417 | -85.1222 | 536.5     | 10/8/1979  | 9/21/1993  | 149 | 1.886  | 1.640  | 368,217     | 527,743     | 12,120    |
| 133416   | SUGAR RIVER AT STH 69 DWNSTM BRIDGE               | 7090004 | WI | 42.94904 | -89.5445 | 212.4     | 5/27/1997  | 12/5/2000  | 48  | 6.478  | 6.440  | 635,266     | 272,682     | 52,815    |
| 133417   | SUGAR RIVER AT VALLEY RD.                         | 7090004 | WI | 42.9725  | -89.5667 | 120.7     | 5/27/1997  | 12/5/2000  | 49  | 6.103  | 5.980  | 217,023     | 149,973     | 10,515    |
| 140001   | Wapsipinicon River                                | 7080103 | IA | 41.7273  | -90.3646 | 6,524.4   | 8/8/1978   | 11/8/2005  | 281 | 5.867  | 5.801  | 17,370,872  | 16,343,047  | 840,109   |
| 160376   | E BR DUPAGE R .5 MI S NAPERVILLE T37N R10E NE7    | 7120004 | IL | 41.7111  | -88.1278 | 194.2     | 3/24/1983  | 9/17/1997  | 8   | 8.093  | 7.020  |             |             |           |
| 160383   | E BR DUPAGE R MAPLE AV LISLE T38N R10E SE10       | 7120004 | IL | 41.78571 | -88.0792 | 136.9     | 3/25/1983  | 9/17/1997  | 8   | 8.172  | 7.215  |             |             |           |
| 163001   | ST. LOUIS RIVER AT OLIVER                         | 4010201 | WI | 46.65669 | -92.2004 | 9,114.0   | 7/11/1972  | 7/17/1990  | 183 | 1.078  | 1.050  | 2,537,362   | 1,439,049   | 72,982    |

Table\_S2\_TN

|                 |                                                   |         |    |          |          |          |            |            |     |        |        |            |            |           |
|-----------------|---------------------------------------------------|---------|----|----------|----------|----------|------------|------------|-----|--------|--------|------------|------------|-----------|
| 163002          | BOIS BRULE RIVER                                  | 4010301 | WI | 46.67936 | -91.5949 | 466.6    | 7/31/1973  | 7/24/2007  | 53  | 0.402  | 0.361  | 82,641     | 118,720    | 10,298    |
| 171408          | MISSISSINEWA RIVER AT PERU MILE POINT 0.8         | 5120103 | IN | 40.75389 | -86.0231 | 2,107.3  | 10/14/1981 | 5/3/1995   | 10  | 4.485  | 4.725  |            |            |           |
| 171420          | ST. MARY'S RIVER NEAR FT WAYNE AT MI PT 10.83     | 4100004 | IN | 40.988   | -85.099  | 1,800.1  | 2/22/1977  | 12/10/1985 | 59  | 5.059  | 4.150  | 8,290,047  | 11,406,774 | 1,286,852 |
| 171433          | WABASH R AT US 27 BRIDGE N OF GENEVA, MI PT451.9  | 5120101 | IN | 40.61667 | -84.9542 | 1,211.3  | 3/4/1980   | 11/5/1987  | 70  | 5.136  | 3.900  | 4,047,143  | 6,749,526  | 649,484   |
| 173051          | RED CEDAR R @ CTH Y BRIDGE                        | 7050007 | WI | 44.71927 | -91.9034 | 4,852.4  | 8/5/1999   | 8/5/1999   | 1   | 1.290  | 1.290  |            |            |           |
| 173208          | Red Cedar R. at Menomonie                         | 7050007 | WI | 44.88336 | -91.9319 | 4,627.8  | 8/4/1987   | 9/5/2007   | 174 | 1.935  | 1.850  | 2,709,144  | 2,527,308  | 66,001    |
| 173993          | WABASH RIVER AT VINCENNES US 50 AT MI PT 129.8    | 5120111 | IN | 38.70722 | -87.5192 | 35,578.4 | 1/15/1980  | 12/27/1985 | 65  | 4.328  | 4.100  | 67,804,929 | 99,203,700 | 4,007,323 |
| 174000          | WABASH R NR HUNTINGTON IND AT MILE POINT 409.05   | 5120101 | IN | 40.85479 | -85.4983 | 1,993.2  | 1/10/1980  | 12/11/1985 | 59  | 5.526  | 5.250  | 4,292,240  | 10,252,786 | 666,878   |
| 174001          | WHITE RIVER NEAR HAZELTON.                        | 5120202 | IN | 38.49083 | -87.5653 | 29,382.0 | 7/23/1986  | 7/23/1986  | 1   | 3.100  | 3.100  |            |            |           |
| 174035          | WHITE R AT PERKINSVILLE MILE POINT 278.610        | 5120201 | IN | 40.14167 | -85.88   | 1,889.5  | 2/24/1977  | 8/19/1992  | 62  | 4.438  | 3.800  | 4,581,978  | 6,977,565  | 540,983   |
| 174303          | BLUE R ON INTERSTATE 70 AT MILE POINT 63.76       | 5120204 | IN | 39.85401 | -85.4773 | 242.3    | 2/8/1977   | 10/22/1985 | 25  | 5.088  | 4.500  |            |            |           |
| 174317          | WHITE RIVER AT EDWARDSPT, MILE POINT 80.98        | 5120202 | IN | 38.80696 | -87.2459 | 12,931.6 | 1/15/1980  | 12/27/1985 | 63  | 3.492  | 3.550  | 20,140,360 | 28,088,496 | 1,390,722 |
| 174319          | WHITE RIVER AT SPENCER MILE POINT 162.22          | 5120202 | IN | 39.28778 | -86.7458 | 7,751.8  | 2/10/1977  | 12/26/1985 | 68  | 4.889  | 4.600  | 14,625,722 | 20,294,749 | 768,536   |
| 174350          | TIPPECANOE R-ROCHESTER US 31 N OF TOWN MI PT 107  | 5120106 | IN | 41.10603 | -86.2204 | 1,485.7  | 7/22/1991  | 7/22/1991  | 1   | 3.700  | 3.700  |            |            |           |
| 174554          | WHITE R-W FORK-WAVERLY S.R. 144 BR MI PT 210      | 5120201 | IN | 39.55972 | -86.2744 | 5,275.6  | 1/21/1986  | 11/30/1995 | 113 | 5.384  | 4.900  | 9,830,469  | 16,991,373 | 509,558   |
| 1BBFW0001       | BEECH FORK LAKE                                   | 5090102 | WV | 38.29936 | -82.3967 | 146.3    | 8/17/1973  | 8/2/1995   | 49  | 0.772  | 0.550  | 50,390     | 65,587     | 10,557    |
| 1DEWW0001       | JOHNS CR OF LEVISA FORK KY                        | 5070203 | KY | 37.73908 | -82.7313 | 4,733.8  | 8/28/1974  | 7/30/1996  | 51  | 0.825  | 0.700  | 2,285,937  | 133,245    | 519,503   |
| 1DILW0003       | LICKING CK AT TOBOSO GAGING STA                   | 5040006 | OH | 40.05694 | -82.22   | 1,743.9  | 8/29/1973  | 8/27/1996  | 42  | 3.937  | 3.600  | 3,083,053  | 2,387,022  | 373,327   |
| 1ELTW0031       | East Fork Twelvepole Ck                           | 5090102 | WV | 38.05222 | -82.3081 | 127.9    | 6/15/1976  | 11/21/1997 | 68  | 0.373  | 0.250  | 17,731     | 43,729     | 5,017     |
| 1ELTW0032       | Kiah Creek                                        | 5090102 | WV | 38.06098 | -82.266  | 75.2     | 5/16/1977  | 11/21/1997 | 63  | 0.449  | 0.250  | 10,715     | 22,643     | 2,795     |
| 1FRLW0001       | LEVISA FORK KY                                    | 5070202 | KY | 37.42494 | -82.4121 | 1,019.3  | 6/25/1974  | 3/29/1994  | 72  | 0.655  | 0.600  | 299,957    | 287,132    | 28,872    |
| 1JWFW0001       | POUND RIVER VA                                    | 5070202 | VA | 37.23734 | -82.3433 | 574.7    | 6/26/1974  | 12/12/1995 | 74  | 0.878  | 0.700  | 174,947    | 153,495    | 25,954    |
| 1JWFW0002       | POUND RIVER VA                                    | 5070202 | VA | 37.16594 | -82.5233 | 215.4    | 6/26/1974  | 12/13/1995 | 72  | 1.237  | 0.625  | 176,273    | 63,074     | 45,952    |
| 1JWFW0003       | CRANES NEST R OF POUND RIVER VA                   | 5070202 | VA | 37.12397 | -82.4385 | 179.7    | 6/25/1974  | 12/12/1995 | 72  | 1.028  | 0.800  | 141,564    | 47,373     | 38,244    |
| 1PCSW0002       | Paint Creek, Main Inflow to Lake                  | 5060003 | OH | 39.32166 | -83.3866 | 706.7    | 7/26/1973  | 12/16/1996 | 60  | 5.399  | 4.500  | 1,939,414  | 2,563,202  | 204,138   |
| 1PESW0003       | STILLWATER CREEK ABOVE POOL                       | 5040001 | OH | 40.10192 | -81.1461 | 130.0    | 6/14/1983  | 10/14/1996 | 30  | 0.844  | 0.800  | 35,674     | 73,738     | 5,251     |
| 1PESW0008       | STILLWATER CREEK                                  | 5040001 | OH | 40.10259 | -81.1311 | 130.0    | 5/14/1987  | 12/19/1997 | 46  | 0.380  | 0.238  | 15,314     | 71,401     | 4,880     |
| 1RDBW0012       | Guyandot River                                    | 5070101 | WV | 37.61083 | -81.7342 | 1,291.5  | 1/29/1980  | 12/29/1997 | 52  | 0.517  | 0.290  | 283,353    | 464,651    | 52,430    |
| 1RDBW0015       | Clear Fork of Guyandot River                      | 5070101 | WV | 37.60917 | -81.7242 | 333.5    | 1/29/1980  | 12/29/1997 | 76  | 0.579  | 0.450  | 110,104    | 139,955    | 18,786    |
| 1SUMW0004       | MUDDLETY CREEK OF GAULEY RIVER                    | 5050005 | WV | 38.32675 | -80.8326 | 128.0    | 10/11/1979 | 5/27/1998  | 33  | 0.609  | 0.600  | 50,309     | 66,663     | 7,804     |
| 1SUTW0008       | RIGHT FK HOLLY RIVER WV                           | 5050007 | WV | 38.63576 | -80.4663 | 142.2    | 6/2/1976   | 5/27/1998  | 54  | 0.508  | 0.450  | 73,468     | 75,337     | 10,164    |
| 230028          | GRAND RIVER AT WEBSTER RD BR; DELTA TWP SEC 3     | 4050004 | MI | 42.76111 | -84.6496 | 3,251.8  | 4/3/1973   | 9/25/1993  | 319 | 3.425  | 3.200  | 3,071,756  | 2,807,405  | 59,119    |
| 233001          | Sugar R. at Broadhead                             | 7090004 | WI | 42.55023 | -89.3663 | 1,551.8  | 12/8/1970  | 9/18/2007  | 148 | 4.990  | 4.900  | 2,562,636  | 2,092,869  | 86,206    |
| 243020          | Fox R. at Berlin                                  | 4030201 | WI | 43.96667 | -88.9502 | 3,426.7  | 1/20/1977  | 7/10/2007  | 201 | 1.807  | 1.780  | 1,897,705  | 1,923,075  | 72,752    |
| 250098          | FLINT R AT CARPENTER RD BR; CITY OF FLINT         | 4080204 | MI | 43.07639 | -83.6542 | 1,591.4  | 9/18/1973  | 9/23/1996  | 212 | 1.580  | 1.480  | 775,492    | 948,378    | 24,001    |
| 260001          | Cuivre River                                      | 7110008 | MO | 38.92417 | -90.7489 | 3,177.5  | 5/3/1993   | 11/8/2005  | 201 | 1.850  | 1.691  | 2,646,675  | 3,801,231  | 245,513   |
| 263001          | MONTREAL RIVER NEAR SAXON, WI                     | 4010302 | WI | 46.55658 | -90.4141 | 689.3    | 4/16/1991  | 3/19/1998  | 10  | 0.926  | 0.850  |            |            |           |
| 273038          | BLACK RIVER AT BYPASS CHANNEL @ K                 | 7040007 | WI | 44.38942 | -90.7601 | 3,299.2  | 1/13/1994  | 6/5/2001   | 77  | 1.304  | 1.185  | 1,624,713  | 2,589,766  | 182,025   |
| 303066          | Fox (IL) R. near New Munster                      | 7120006 | WI | 42.61085 | -88.2254 | 2,040.9  | 3/13/1997  | 7/30/2007  | 42  | 3.179  | 2.855  | 1,665,557  | 1,780,533  | 130,630   |
| 313038          | KEWAUNEE RIVER NEAR KEWAUNEE, WI                  | 4030102 | WI | 44.45745 | -87.5557 | 343.4    | 6/28/1983  | 9/18/2007  | 120 | 3.926  | 3.650  | 380,809    | 536,957    | 27,031    |
| 320540          | Iowa River HWY 92 BR AT COLUMBUS JUNCTION         | 7080209 | IA | 41.27885 | -91.3447 | 31,516.5 | 9/22/1976  | 8/2/2006   | 221 | 6.402  | 6.300  | 64,358,174 | 69,520,224 | 2,325,102 |
| 324015          | CEDAR RIVER AT LEWIS ACCESS, 6.5 MI N OF PALO     | 7080205 | IA | 42.16135 | -91.8107 | 15,903.7 |            |            |     |        |        |            |            |           |
| 343033          | Wolf R. at Langlade                               | 4030202 | WI | 45.18998 | -88.7337 | 1,204.9  | 7/10/2001  | 9/20/2007  | 75  | 0.578  | 0.594  | 232,897    | 232,852    | 15,362    |
| 353068          | Wisconsin R. at Merrill                           | 7070002 | WI | 45.17822 | -89.6862 | 7,122.0  | 5/25/1978  | 9/20/2007  | 78  | 0.783  | 0.729  | 1,516,534  | 1,083,728  | 55,940    |
| 373001          | WISCONSIN RIVER AT WAUSAU                         | 7070002 | WI | 44.95773 | -89.6358 | 7,829.1  | 11/19/1970 | 6/19/2001  | 262 | 0.944  | 0.890  | 2,070,641  | 1,542,910  | 82,175    |
| 373325          | BIG EAU PLEINE RIVER AT STRATFORD, WI             | 7070002 | WI | 44.82076 | -90.0788 | 632.0    | 2/2/1976   | 9/12/2007  | 85  | 1.571  | 1.330  | 490,061    | 738,950    | 58,312    |
| 380031x         | GRAND R AT MAPLE GROVE RD; RIVES TWP, SEC 35      | 4050004 | MI | 42.34167 | -84.4016 | 932.4    | 8/30/1971  | 8/8/2001   | 126 | 2.860  | 2.620  | 734,481    | 547,050    | 140,369   |
| 380153          | SHEYENNE RIVER - BALHILL DAM                      | 9020204 | ND | 47.02735 | -98.0862 | 9,847.5  | 8/22/1995  | 11/7/2006  | 29  | 1.341  | 1.180  | 247,285    | 942,781    | 20,873    |
| 3822350602001   | HOCKING R. DST LANCASTER - 1ST U.S. RT 33 BRIDGE  | 5030204 | OH | 39.68595 | -82.5738 | 179.7    | 1/23/1976  | 1/8/1997   | 252 | 4.007  | 3.810  | 235,188    | 314,126    | 7,945     |
| 383001          | PESHIGO RIVER AT PESHTIGO, WI                     | 4030105 | WI | 45.05381 | -87.7471 | 2,794.6  | 12/9/1970  | 8/8/2007   | 293 | 0.827  | 0.750  | 614,286    | 849,885    | 23,572    |
| 390057          | KALAMAZOO R AT "G" AVE BRIDGE; CITY OF AUGUSTA    | 4050003 | MI | 42.33528 | -85.3453 | 2,356.1  | 8/30/1971  | 9/21/1993  | 191 | 1.832  | 1.830  | 1,366,131  | 2,327,871  | 22,509    |
| 390553          | South Skunk River CO RD BR E57                    | 7080105 | IA | 41.97322 | -93.5806 | 1,480.0  | 11/8/1979  | 11/9/1998  | 79  | 10.880 | 10.365 | 5,052,821  | 3,425,640  | 710,419   |
| 390566          | SOUTH SKUNK RIVER APPROX 3.5 MI NNW OF CAMBRIDGE  | 7080105 | IA | 41.95035 | -93.5511 | 1,523.8  | 10/8/1991  | 9/12/2007  | 184 | 11.327 | 11.250 | 5,272,574  | 3,482,294  | 295,997   |
| 391732085414401 | CLIFTY CREEK AT CO RD 1150 E NEAR HARTSVILLE, IN  | 5120206 | IN | 39.29227 | -85.6955 | 227.7    | 3/26/1993  | 8/10/2004  | 33  | 6.025  | 6.300  | 876,056    | 934,705    | 381,065   |
| 394340085524601 | SUGAR CREEK AT CO RD 400 S AT NEW PALESTINE, IN   | 5120204 | IN | 39.72782 | -85.8794 | 239.8    | 5/7/1992   | 8/30/2005  | 271 | 2.859  | 2.404  | 510,462    | 1,180,824  | 36,961    |
| 40007           | Cannon River                                      | 7040002 | MN | 44.58477 | -92.5628 | 3,835.2  | 10/1/1991  | 11/8/2005  | 249 | 4.886  | 4.748  | 5,301,861  | 6,202,996  | 206,843   |
| 410050          | GRAND RIVER AT KNAPP STREET; ADA TWP, SEC 7       | 4050006 | MI | 43.00611 | -85.5425 | 11,577.7 | 8/30/1971  | 9/22/1993  | 204 | 2.236  | 2.030  | 9,021,655  | 12,462,977 | 220,432   |
| 410052          | GRAND R AT M-11 BRIDGE; CITY OF GRANDVILLE        | 4050006 | MI | 42.91524 | -85.7667 | 12,790.2 | 8/30/1971  | 9/22/1993  | 240 | 2.465  | 2.260  | 9,964,717  | 14,403,151 | 187,894   |
| 413002          | MILWAUKEE RIVER @ BROWN DEER ROAD                 | 4040003 | WI | 43.17769 | -87.9561 | 1,632.4  | 12/16/1970 | 11/17/1976 | 41  | 2.053  | 1.910  | 910,911    | 1,869,721  | 64,684    |
| 423014          | North Raccoon River CO RD BR D46 SEC 13/24 AT SAC | 7100006 | IA | 42.33971 | -94.9859 | 1,834.5  | 10/9/1979  | 9/10/2007  | 350 | 11.751 | 11.200 | 6,882,868  | 5,098,036  | 263,435   |

Table\_S2\_TN

|           |                                                    |         |    |          |          |           |            |            |     |       |       |            |            |           |
|-----------|----------------------------------------------------|---------|----|----------|----------|-----------|------------|------------|-----|-------|-------|------------|------------|-----------|
| 426046    | South River BRIDGE HIWAY 92                        | 7100008 | IA | 41.37214 | -93.4309 | 1,230.8   | 11/6/1986  | 9/6/2007   | 93  | 1.776 | 1.300 | 1,121,505  | 1,148,392  | 186,981   |
| 430380    | Des Moines River CO RD E26 NW OF BOONE             | 7100004 | IA | 42.08029 | -93.9382 | 14,065.6  | 1/5/1971   | 10/27/1981 | 195 | 6.473 | 6.260 | 49,718,547 | 28,707,560 | 4,862,869 |
| 433002    | OCONTO RIVER NEAR OCONTO, WI                       | 4030104 | WI | 44.88271 | -87.8843 | 2,504.5   | 10/26/1988 | 7/11/2007  | 47  | 1.197 | 0.933 | 566,377    | 1,130,840  | 36,260    |
| 443001    | WISCONSIN RIVER AT RHINELANDER                     | 7070001 | WI | 45.64094 | -89.4205 | 2,221.8   | 4/17/1974  | 12/11/2001 | 115 | 0.603 | 0.610 | 341,760    | 193,818    | 13,731    |
| 443002    | WISCONSIN R AT HAT RAPIDS DAM                      | 7070001 | WI | 45.5742  | -89.4789 | 2,929.2   | 4/17/1974  | 6/30/1999  | 212 | 0.896 | 0.855 | 464,508    | 348,080    | 20,678    |
| 443003    | WISCONSIN RIVER BRIDGE AT MCNAUGHTON               | 7070001 | WI | 45.73376 | -89.5133 | 2,015.8   | 3/27/1979  | 11/29/2001 | 173 | 0.588 | 0.550 | 290,558    | 182,313    | 12,809    |
| 443015    | East Fk Des Moines River HWY 169 BR 1 MI N ST JOSE | 7100003 | IA | 42.93537 | -94.2271 | 2,439.4   | 1/19/1971  | 12/7/1998  | 151 | 8.038 | 7.900 | 8,414,842  | 5,028,205  | 687,647   |
| 443704    | Wapsipinicon River CO RD BR 0.5 MI W. OF D16 N. OF | 7080102 | IA | 42.51197 | -91.9746 | 2,386.1   | 10/30/1979 | 9/10/2007  | 142 | 6.441 | 5.900 | 7,534,303  | 6,708,912  | 429,053   |
| 444066    | Des Moines River CO RD BR P59 AT KALO S. OF FT DOD | 7100004 | IA | 42.43159 | -94.1325 | 10,842.0  | 11/16/1979 | 9/10/2007  | 113 | 7.988 | 7.990 | 33,278,353 | 20,714,904 | 2,092,063 |
| 46021     | DUPAGE R OLD RT 6 S CHANNAHON T34N R9E NW20        | 7120004 | IL | 41.41944 | -88.2278 | 954.2     | 3/23/1983  | 2/10/1984  | 4   | 7.605 | 7.960 |            |            |           |
| 47018     | W BR DUPAGE R 2 MI S NAPERVILLE T37N R10E NE6      | 7120004 | IL | 41.72    | -88.1322 | 319.9     | 3/25/1983  | 2/6/1984   | 4   | 5.465 | 4.430 |            |            |           |
| 47041     | HICKORY CR 1 MI NE NEW LENOX T35N R11E NE14        | 7120004 | IL | 41.51611 | -87.973  | 198.8     | 9/8/1983   | 4/5/1984   | 3   | 5.033 | 4.500 |            |            |           |
| 47087     | Kaskaskia River RT 133 BRIDGE IN CHESTERVILLE.     | 7140201 | IL | 39.70266 | -88.3871 | 931.1     | 4/27/1983  | 12/16/1997 | 5   | 7.516 | 8.370 |            |            |           |
| 48046     | FOX R AT WEDRON T34N R4E NE9                       | 7120007 | IL | 41.4319  | -88.7726 | 6,602.5   | 5/17/1982  | 8/30/1996  | 5   | 3.808 | 3.220 |            |            |           |
| 48246     | SALT CR YORK RD HINSDALE T39N R11E SE36            | 7120004 | IL | 41.82083 | -87.9271 | 306.0     | 4/13/1995  | 10/2/1995  | 8   | 6.205 | 4.300 |            |            |           |
| 48247     | SALT CR RT 51 ELMHURST T39N R11E SW14              | 7120004 | IL | 41.86592 | -87.9517 | 253.7     | 4/12/1995  | 10/2/1995  | 8   | 6.128 | 4.055 |            |            |           |
| 48278     | S BR KISHWAUKEE R 1.5 MI W SYCAMORE T41NR4ESE25    | 7090006 | IL | 41.99662 | -88.7222 | 240.5     | 8/12/1983  | 7/16/1984  | 4   | 9.648 | 9.065 |            |            |           |
| 483026    | MISS R.LOCK+DAM # 2 HASTINGS,MN.                   | 7010206 | MN | 44.76058 | -92.8674 | 90,233.2  | 9/16/1971  | 9/15/1994  | 288 | 3.890 | 3.400 | 68,389,635 | 84,207,592 | 1,976,074 |
| 483027    | Mississippi R. Above LD 3                          | 7040001 | WI | 44.61125 | -92.611  | 109,835.0 | 10/6/1970  | 12/1/1998  | 342 | 3.092 | 2.725 | 74,371,335 | 90,585,780 | 3,399,701 |
| 48343     | KICKAPOO CR 1 MI SSW CHARLESTON T12N R9E SW22      | 5120112 | IL | 39.46311 | -88.1934 | 253.8     |            |            |     |       |       |            |            |           |
| 48414     | KICKAPOO CR RT 136 BR 1 M W HEYWORTH T22NR2ESW32   | 7130009 | IL | 40.31209 | -89.0144 | 306.9     | 9/16/1981  | 9/24/1997  | 4   | 5.610 | 6.245 |            |            |           |
| 48494     | HURRICANE CR 4 MI WNW HERRIN T8SR1ESE16            | 7140106 | IL | 37.82277 | -89.095  | 62.0      | 7/25/1995  | 2/29/1996  | 2   | 1.445 | 1.445 |            |            |           |
| 48525     | PECATONICA R E EDGE WINSLOW T29N R6E SE22          | 7090003 | IL | 42.49312 | -89.7897 | 2,676.1   | 5/1/1984   | 11/18/1998 | 6   | 6.250 | 6.250 |            |            |           |
| 4CRR11005 | CHEAT RIVER RM 75.6                                | 5020004 | WV | 39.12125 | -79.6756 | 1,850.2   | 4/26/1973  | 3/12/1996  | 109 | 0.571 | 0.530 | 1,192,563  | 1,155,065  | 72,682    |
| 500233    | CLINTON R@ NO. BOUND GRATIOT AVE IN MT. CLEMENS    | 4090003 | MI | 42.58417 | -82.8828 | 1,951.2   | 1/17/1974  | 11/22/2005 | 362 | 3.250 | 3.130 | 1,057,180  | 1,576,475  | 30,875    |
| 501790    | ROCKY R. AT LAKEWOOD - PARK BLVD. (RM 3.0)         | 4110001 | OH | 41.46944 | -81.8317 | 746.3     | 11/19/1980 | 12/9/1998  | 228 | 4.691 | 4.260 | 946,884    | 1,006,616  | 36,347    |
| 501810    | ROCKY R. AT FAIRVIEW PARK - PURITAS RD (RM 8.18)   | 4110001 | OH | 41.43778 | -81.8456 | 728.6     | 5/22/1974  | 9/3/1997   | 28  | 4.323 | 3.880 | 700,959    | 1,000,712  | 84,169    |
| 502070    | CUYAHOGA R AT SHALERSVILLE - DIAGONAL RD-SR 303    | 4110002 | OH | 41.23806 | -81.3031 | 488.7     | 8/8/1973   | 12/10/1998 | 70  | 1.000 | 0.950 | 207,335    | 347,905    | 17,298    |
| 502080    | L. CUYAHOGA R AT AKRON - OTTO ST GAGE (RM 1.85)    | 4110002 | OH | 41.09444 | -81.5217 | 160.5     | 8/8/1973   | 9/4/1996   | 65  | 2.022 | 1.620 | 107,296    | 43,040     | 13,012    |
| 502130    | CUYAHOGA R. AT CLEVELAND - LOWER HARVARD AVE.      | 4110002 | OH | 41.44778 | -81.685  | 2,032.8   | 10/23/1991 | 12/10/1998 | 81  | 5.560 | 4.970 | 5,390,208  | 4,449,083  | 209,591   |
| 503003    | WISCONSIN RIVER ABOVE DUBAY DAM                    | 7070002 | WI | 44.6649  | -89.6505 | 12,483.3  | 8/17/1976  | 4/5/2001   | 193 | 1.329 | 1.265 | 4,667,486  | 5,090,275  | 244,080   |
| 503059    | WISCONSIN RIVER ABOVE STEVENS POINT DAM            | 7070003 | WI | 44.51641 | -89.5864 | 12,686.8  | 8/18/1976  | 6/19/2001  | 94  | 1.274 | 1.217 | 4,606,342  | 5,061,014  | 288,542   |
| 510017    | MANISTEE R. AT HIGH BR RD; DICKSON TWP, SEC 33     | 4060103 | MI | 44.2675  | -86.0139 | 3,621.4   | 4/8/1975   | 10/12/1982 | 104 | 0.505 | 0.480 | 758,157    | 1,043,704  | 22,868    |
| 523061    | Root River                                         | 4040002 | WI | 42.78528 | -87.8299 | 478.9     | 1/26/1977  | 9/18/2007  | 259 | 4.297 | 3.930 | 605,794    | 633,615    | 38,630    |
| 53210     | Fox R. at DePere                                   | 4030204 | WI | 44.46111 | -88.0591 | 16,171.5  | 10/17/1988 | 11/11/2005 | 143 | 1.670 | 1.596 | 7,452,501  | 5,765,558  | 298,009   |
| 543056    | YAHARA R AT CTH M AT FULTON                        | 7090001 | WI | 42.80806 | -89.1255 | 1,231.4   | 7/18/1977  | 10/26/1997 | 72  | 6.214 | 5.465 | 1,503,207  | 999,746    | 54,071    |
| 550353    | Tug Fork at Fort Gay, W. Va.                       | 5070201 | WV | 38.11694 | -82.5983 | 4,030.6   | 3/5/1985   | 8/19/2004  | 126 | 0.873 | 0.760 | 3,159,218  | 1,272,446  | 433,835   |
| 550446    | Monongahela River below Morgantown, W. Va.         | 5020003 | WV | 39.65806 | -79.9931 | 6,920.1   | 7/16/1974  | 9/15/2004  | 254 | 1.031 | 0.900 | 5,078,786  | 4,041,592  | 334,488   |
| 550476    | Coal River at Tornado, W. Va.                      | 5050009 | WV | 38.33889 | -81.8408 | 2,223.3   | 11/13/1973 | 8/16/2004  | 246 | 0.856 | 0.760 | 1,375,009  | 835,200    | 118,262   |
| 550500    | New River at C&O Railroad Bridge                   | 5050004 | WV | 38.15092 | -81.1799 | 17,993.3  | 11/19/1973 | 8/17/2004  | 247 | 0.979 | 0.900 | 8,208,787  | 10,849,961 | 582,723   |
| 550544    | Elk River at Coonskin Park, above Charleston, WV   | 5050007 | WV | 38.38531 | -81.586  | 3,917.8   | 11/13/1973 | 7/8/2004   | 205 | 0.689 | 0.630 | 1,844,456  | 1,919,168  | 190,935   |
| 573052    | Wisconsin R. at Wisconsin Del                      | 7070003 | WI | 43.62734 | -89.7808 | 20,668.3  | 2/28/1977  | 9/17/2007  | 243 | 1.345 | 1.296 | 8,085,332  | 18,381,401 | 209,965   |
| 573081    | BARABOO RIVER 1994 MILWAUKEE BRIDGE                | 7070004 | WI | 43.47032 | -89.7689 | 1,433.7   | 9/23/1997  | 12/3/2001  | 53  | 1.906 | 1.905 | 809,568    | 1,464,340  | 38,393    |
| 573082    | BARABOO RIVER AT HWY 113                           | 7070004 | WI | 43.45833 | -89.7165 | 1,455.5   | 9/23/1997  | 12/3/2001  | 53  | 1.904 | 1.911 | 825,258    | 1,514,486  | 35,993    |
| 580046    | RAISIN R. AT ERA DOCK NEAR MOUTH; CITY OF MONROE   | 4100002 | MI | 41.90056 | -83.3544 | 2,743.0   | 10/12/1970 | 10/3/2005  | 283 | 3.299 | 2.630 | 2,387,707  | 5,436,475  | 173,174   |
| 600150    | GREAT MIAMI R. AT MIAMISBURG - S.R. 725            | 5080002 | OH | 39.64444 | -84.2897 | 7,015.9   | 11/21/1994 | 12/17/1998 | 28  | 4.894 | 4.730 | 18,733,215 | 16,352,764 | 1,327,129 |
| 600810    | SCIOTO R. AT SHADEVILLE - S.R. 665                 | 5060001 | OH | 39.8325  | -83.0083 | 4,387.8   | 1/22/1976  | 10/7/1996  | 477 | 7.242 | 7.220 | 9,706,478  | 15,237,444 | 270,245   |
| 600850    | SCIOTO R. AT COLUMBUS - MOUND ST.                  | 5060001 | OH | 39.95222 | -83.0125 | 4,183.1   | 6/18/1980  | 10/7/1996  | 460 | 3.988 | 3.580 | 11,049,586 | 13,539,642 | 501,342   |
| 600870    | SCIOTO R. AT COLUMBUS - FRANK RD.                  | 5060001 | OH | 39.91667 | -83.0097 | 4,205.8   | 9/3/1980   | 10/7/1996  | 501 | 4.321 | 3.755 | 10,327,433 | 13,513,285 | 402,213   |
| 600880    | SCIOTO R. AT COLUMBUS - I-270 S.                   | 5060001 | OH | 39.88062 | -83.0179 | 4,232.5   | 6/17/1980  | 10/7/1996  | 484 | 7.319 | 7.325 | 8,707,759  | 15,175,126 | 217,635   |
| 600900    | SCIOTO R. NR COMMERCIAL POINT - S.R. 762           | 5060001 | OH | 39.77417 | -83.0075 | 5,879.7   | 10/18/1979 | 10/7/1996  | 509 | 6.457 | 6.365 | 11,440,366 | 18,595,067 | 233,406   |
| 600910    | SCIOTO R. NR SOUTH BLOOMFIELD - S.R. 316           | 5060001 | OH | 39.71944 | -83.0125 | 5,987.4   | 6/17/1980  | 10/7/1996  | 439 | 6.306 | 6.120 | 12,060,063 | 18,711,077 | 270,903   |
| 600920    | SCIOTO R. DST CHILLICOTHE - U.S. RT. 35            | 5060002 | OH | 39.30556 | -82.9203 | 10,010.7  | 8/15/1979  | 9/23/1997  | 17  | 3.219 | 3.210 |            |            |           |
| 600960    | SCIOTO R. AT CIRCLEVILLE - U.S. RT. 22             | 5060002 | OH | 39.60139 | -82.9553 | 8,331.7   | 1/22/1976  | 9/16/1996  | 73  | 4.716 | 4.850 | 14,353,106 | 24,681,683 | 1,182,014 |
| 601000    | SCIOTO R. AT PIKETON - U.S. RT. 23 (RM 34.50)      | 5060002 | OH | 39.07222 | -83.0056 | 15,114.5  | 8/1/1979   | 9/23/1997  | 6   | 2.863 | 2.860 |            |            |           |
| 601010    | SCIOTO R. AT JASPER - S.R. 124 (RM 30.08)          | 5060002 | OH | 39.04716 | -83.05   | 15,135.1  | 8/1/1979   | 9/23/1997  | 6   | 2.980 | 2.920 |            |            |           |
| 601290    | OLENTANGY R. NR WORTHINGTON - I-270 N.             | 5060001 | OH | 40.11091 | -83.0329 | 1,284.0   | 2/4/1976   | 1/23/1997  | 114 | 3.493 | 3.185 | 2,332,780  | 3,292,658  | 174,689   |
| 601340    | SCIOTO R. UPST CIRCLEVILLE - FLORENCE CHAPEL RD.   | 5060001 | OH | 39.63278 | -82.9625 | 6,830.3   | 10/25/1977 | 1/8/1997   | 246 | 5.189 | 5.120 | 11,509,977 | 20,148,935 | 346,187   |
| 601350    | MILL CREEK OFF WALDO ROAD - MARYSVILLE (RM 16.8)   | 5060001 | OH | 40.25583 | -83.3453 | 235.4     | 5/17/1977  | 1/23/1997  | 228 | 6.534 | 5.270 | 378,559    | 872,088    | 23,128    |
| 601400    | RACCOON CREEK AT ADAMSVILLE - U.S. RT. 35          | 5090101 | OH | 38.87361 | -82.3561 | 1,518.7   | 10/25/1977 | 12/14/1998 | 121 | 0.865 | 0.720 | 474,519    | 738,678    | 34,815    |

Table\_S2\_TN

|              |                                                    |         |    |          |          |           |            |            |     |       |       |            |             |           |
|--------------|----------------------------------------------------|---------|----|----------|----------|-----------|------------|------------|-----|-------|-------|------------|-------------|-----------|
| 601930       | TUSCARAWAS R. AT MASSILLON - WARMINGTON ST.        | 5040001 | OH | 40.75222 | -81.5292 | 1,343.7   | 1/29/1976  | 12/22/1998 | 266 | 5.559 | 4.800 | 2,014,277  | 1,512,635   | 65,904    |
| 601940       | NIMISHILLEN CRK DST N. INDUSTRY - HOWENSTINE RD.   | 5040001 | OH | 40.71718 | -81.3473 | 463.2     | 2/25/1976  | 12/22/1998 | 263 | 6.735 | 6.330 | 1,272,103  | 829,000     | 28,092    |
| 602280       | MAHONING R. AT LEAVITTSBURG - LEAVITT RD.          | 5030103 | OH | 41.23944 | -80.8811 | 1,487.5   | 10/16/1973 | 12/22/1998 | 297 | 1.294 | 1.200 | 826,047    | 1,173,554   | 50,313    |
| 603095       | Sheboygan R. at Esslingen Par                      | 4030101 | WI | 43.74053 | -87.7512 | 1,103.7   | 2/23/1977  | 9/10/2007  | 321 | 2.785 | 2.510 | 941,136    | 1,797,659   | 39,630    |
| 610060       | GREAT MIAMI R. AT DAYTON - MONUMENT AVE.           | 5080002 | OH | 39.76334 | -84.2021 | 6,491.1   | 10/12/1978 | 12/17/1998 | 220 | 4.456 | 4.070 | 15,481,231 | 14,605,178  | 560,082   |
| 610520       | L. MIAMI R. NR MORROW - STUBBS MILL RD.            | 5090202 | OH | 39.3634  | -84.1735 | 2,498.5   | 4/7/1976   | 9/1/1998   | 71  | 3.723 | 3.525 | 4,928,478  | 5,192,944   | 339,765   |
| 610530       | E FK L MIAMI R NR MILFORD - NR TERRACE PARK C.C.   | 5090202 | OH | 39.15526 | -84.2898 | 1,292.6   | 2/28/1978  | 9/8/1998   | 62  | 2.450 | 2.390 | 1,228,901  | 1,797,086   | 68,886    |
| 611740       | MUSKINGUM R. DST COSHOCTON - S.R. 83               | 5040004 | OH | 40.23547 | -81.8713 | 12,562.8  | 1/14/1976  | 12/16/1998 | 186 | 2.452 | 2.420 | 12,749,932 | 13,096,522  | 360,159   |
| 611790       | TUSCARAWAS R. AT NEWCOMERSTOWN - RIVER ST.         | 5040001 | OH | 40.26139 | -81.6092 | 6,322.3   | 10/28/1977 | 12/16/1998 | 208 | 2.530 | 2.400 | 6,161,408  | 6,091,545   | 162,840   |
| 63029        | Mississippi R. Above LD 4                          | 7040003 | WI | 44.32495 | -91.9227 | 141,590.8 | 1/24/1977  | 12/1/1998  | 264 | 1.956 | 1.880 | 58,590,582 | 106,389,496 | 1,190,091 |
| 643509       | Wis R Tailwater - Otter RPS Dam                    | 7070001 | WI | 45.90361 | -89.3214 | 1,427.1   | 8/10/1999  | 11/29/2001 | 26  | 0.645 | 0.564 |            |             |           |
| 683096       | Fox (IL) R. below Waukesha                         | 7120006 | WI | 42.93375 | -88.2928 | 475.2     | 1/26/1977  | 1/30/2007  | 220 | 4.419 | 4.330 | 606,878    | 539,428     | 16,037    |
| 693035       | Wolf R. at New London                              | 4030202 | WI | 44.3917  | -88.7496 | 6,123.2   | 1/19/1977  | 9/5/2007   | 286 | 1.547 | 1.370 | 2,847,773  | 3,428,775   | 104,356   |
| 6ACNR009.17  | Cranes Nest River N.E. FROM ROUTE 83               | 5070202 | VA | 37.15083 | -82.4108 | 198.6     | 4/13/1982  | 11/2/1998  | 124 | 0.825 | 0.785 | 77,297     | 50,042      | 3,916     |
| 6ADIS0001.24 | Dismal Creek, RT. 666 BRIDGE                       | 5070202 | VA | 37.24278 | -82.0275 | 223.0     | 7/27/1976  | 12/14/1998 | 177 | 0.423 | 0.385 | 55,244     | 69,393      | 4,222     |
| 6AKOX008.11  | Knox Creek RT. 697 AT STATE LINE                   | 5070201 | KY | 37.47064 | -82.0624 | 228.9     | 7/18/1974  | 12/14/1998 | 193 | 0.590 | 0.565 | 82,733     | 62,168      | 11,939    |
| 6ALEV131.52  | Levisa Fork WELLMORE COAL CO.DOCK #14 BR OFF 460 . | 5070202 | VA | 37.34833 | -82.2056 | 770.1     | 6/17/1992  | 12/14/1998 | 74  | 0.478 | 0.465 | 271,336    | 226,853     | 31,531    |
| 6ALEV143.86  | Levisa Fork TEEL BR.ON RAILROAD AVE OFF RT 83, .1  | 5070202 | VA | 37.27694 | -82.1008 | 505.9     | 6/17/1992  | 12/14/1998 | 73  | 0.496 | 0.490 | 157,035    | 145,071     | 18,639    |
| 6AMCR007.46  | McClure River RT. 63 BR N OF CLINCH                | 5070202 | VA | 37.16831 | -82.361  | 251.0     | 5/4/1973   | 12/7/1998  | 213 | 0.555 | 0.455 | 54,096     | 70,302      | 6,294     |
| 6ARSS026.98  | Russell Fork UPSTREAM OF LAZARUS BR & DOWNSTR RT 7 | 5070202 | VA | 37.1925  | -82.2878 | 389.9     | 5/14/1992  | 12/7/1998  | 42  | 0.456 | 0.383 | 142,054    | 111,785     | 23,557    |
| 6ASAT000.03  | Slate Creek RT. 460 BRIDGE IN GRUNDY               | 5070202 | VA | 37.27889 | -82.0994 | 106.2     | 7/27/1976  | 9/11/1986  | 102 | 0.637 | 0.585 | 58,678     | 30,242      | 9,096     |
| 70005        | BLACK RIVER NEAR GALESVILLE, WI                    | 7040007 | WI | 43.96192 | -91.3371 | 5,868.2   | 5/6/1993   | 11/9/2005  | 240 | 1.463 | 1.340 | 2,673,797  | 4,009,662   | 102,886   |
| 713001       | FOX RIVER AT OMRO                                  | 4030201 | WI | 44.04014 | -88.7446 | 3,829.4   | 12/15/1970 | 1/9/1996   | 65  | 1.746 | 1.660 | 2,038,287  | 2,422,316   | 92,338    |
| 713002       | Fox R. at Neenah and Menasha                       | 4030203 | WI | 44.18647 | -88.4565 | 15,567.1  | 7/17/1986  | 9/5/2007   | 210 | 1.310 | 1.306 | 5,328,966  | 3,911,163   | 134,440   |
| 723002       | Wisconsin R. at Biron                              | 7070003 | WI | 44.43405 | -89.7764 | 13,944.2  | 8/17/1976  | 9/19/2007  | 272 | 1.460 | 1.420 | 5,508,019  | 5,917,414   | 119,845   |
| 723020       | WISCONSIN RIVER AT STH 73 IN NEKOOSA               | 7070003 | WI | 44.31438 | -89.8884 | 14,230.6  | 2/8/1978   | 4/5/2001   | 98  | 1.655 | 1.580 | 5,755,872  | 6,686,464   | 314,279   |
| 730023       | SHIAWASSEE R@ FERGUS RD; ST. CHARLES TWP SEC 22    | 4080203 | MI | 43.25472 | -84.1056 | 1,576.2   | 8/31/1971  | 11/29/2005 | 93  | 1.720 | 1.411 | 1,008,888  | 1,273,111   | 75,891    |
| 730150       | SAGINAW R OFF CENTER ST BR; SAGINAW TWP, SEC 35    | 4080206 | MI | 43.40222 | -83.9661 | 15,322.4  | 1/29/1974  | 6/18/1996  | 96  | 2.789 | 2.580 | 10,444,976 | 14,123,032  | 578,891   |
| 740144       | BLACK R AT 10TH AVE. BRIDGE; CITY OF PORT HURON    | 4090001 | MI | 42.98083 | -82.4336 | 1,836.3   | 5/21/1973  | 6/18/1978  | 56  | 1.768 | 1.255 | 2,214,303  | 2,101,154   | 259,781   |
| 740153       | BLACK R AT WADHAMS RD BRIDGE; KIMBALL TWP, SEC 2   | 4090001 | MI | 42.98981 | -82.5378 | 1,759.8   | 5/22/1973  | 8/24/1993  | 214 | 2.892 | 2.210 | 2,061,062  | 2,085,291   | 147,046   |
| 784016       | ENGLISH RIVER AT BRIDGE CO RD W61 AT RIVERSIDE     | 7080209 | IA | 41.47548 | -91.5802 | 1,626.8   | 10/20/1986 | 9/11/2007  | 255 | 6.010 | 5.710 | 4,188,503  | 3,204,683   | 283,850   |
| 80001        | LaCrosse River                                     | 7040006 | WI | 43.81882 | -91.2535 | 1,234.4   | 10/4/1999  | 9/18/2007  | 125 | 1.938 | 1.852 | 584,872    | 881,207     | 11,262    |
| 810006       | SALINE R AT MAPLE RD BRIDGE; SALINE TWP, SEC 13    | 4100002 | MI | 42.113   | -83.7756 | 247.6     | 9/1/1971   | 10/8/1980  | 40  | 3.120 | 2.920 | 252,681    | 304,912     | 17,628    |
| 810042       | HURON R AT SUPERIOR RD BR; SUPERIOR TWP, SEC 32    | 4090005 | MI | 42.25954 | -83.6394 | 2,060.6   | 9/1/1971   | 8/25/1993  | 242 | 2.119 | 2.000 | 940,626    | 1,323,641   | 17,228    |
| 810242       | HURON R AT HURON BR PARK; ANN ARBOR TWP., SEC 17   | 4090005 | MI | 42.30333 | -83.7467 | 1,892.3   | 4/16/1975  | 9/14/2005  | 214 | 1.085 | 0.990 | 622,542    | 903,466     | 31,273    |
| 821004       | CEDAR CREEK AT BRIDGE 3 MI WNW OF OAKLAND MILLS    | 7080107 | IA | 40.94456 | -91.6783 | 1,383.1   | 10/20/1986 | 12/1/1998  | 147 | 5.489 | 5.000 | 3,522,281  | 2,469,064   | 396,916   |
| 9-CRK003.00  | Crooked Creek, RT. 635 BRIDGE AT INTERSECTION WITH | 5050001 | VA | 36.76861 | -80.9078 | 185.7     | 6/18/1992  | 11/30/1998 | 38  | 0.616 | 0.578 | 74,415     | 112,633     | 5,049     |
| 9-EKC003.78  | AT MT CARMEL CHURCH ON RT 650, 1.8 MI OFF RT 660   | 5050001 | VA | 36.69806 | -81.0575 | 164.4     | 5/21/1992  | 12/17/1998 | 40  | 1.017 | 0.975 | 108,825    | 97,970      | 8,159     |
| 9-FXC000.84  | LOW WATER BRIDGE OFF RT 711, APPROX .75 MI W. FOX  | 5050001 | VA | 36.61444 | -81.3056 | 197.9     | 5/21/1992  | 11/30/1998 | 38  | 0.466 | 0.465 | 66,670     | 95,084      | 9,742     |
| 9-LRV000.34  | Little River RT. 605 BRIDGE, S OF RADFORD          | 5050001 | VA | 37.07861 | -80.5753 | 910.7     | 11/2/1970  | 11/4/1998  | 95  | 0.700 | 0.647 | 426,779    | 525,965     | 105,024   |
| 9-NEW081.72  | New River RT. 11 BRIDGE AT RADFORD                 | 5050001 | VA | 37.13861 | -80.575  | 7,151.9   | 11/2/1970  | 12/8/1998  | 304 | 0.937 | 0.880 | 4,758,762  | 3,835,299   | 239,353   |
| 9-NEW107.51  | New River STA #25 ALLSONIA AT GAGE (PULASKI COUNTY | 5050001 | VA | 36.93639 | -80.7461 | 5,726.1   | 11/29/1993 | 12/7/1998  | 57  | 0.786 | 0.785 | 2,463,362  | 3,218,602   | 139,605   |
| 9-NEW187.46  | New River OFF RT. 58 AT MOUTH OF WILSON OR RT. 93  | 5050001 | VA | 36.58531 | -81.3142 | 1,744.4   | 11/3/1970  | 12/17/1998 | 291 | 0.776 | 0.755 | 813,207    | 945,001     | 40,996    |
| 9-WFC016.45  | Wolf Creek at PRIVATELY OWNED LOW WATER BR OFF RT  | 5050002 | VA | 37.25641 | -81.0143 | 505.6     | 6/15/1992  | 11/3/1998  | 32  | 0.661 | 0.655 | 166,781    | 192,474     | 13,017    |
| 9-WLK004.34  | Walker Creek RT. 622 BRIDGE, BELOW PEARISBURG      | 5050002 | VA | 37.29651 | -80.7063 | 791.9     | 11/2/1970  | 11/17/1998 | 90  | 0.625 | 0.567 | 170,354    | 277,774     | 35,695    |
| 9-WLS002.57  | Wilscon Creek, RT 721 BRIDGE OFF RT 56/16, APPROX  | 5050001 | VA | 36.59972 | -81.3547 | 75.6      | 6/10/1992  | 11/30/1998 | 38  | 0.564 | 0.555 | 26,448     | 46,709      | 1,695     |
| 90003        | Upper Iowa River                                   | 7060002 | IA | 43.47444 | -91.2944 | 2,568.5   | 10/26/1979 | 9/20/2004  | 397 | 4.767 | 4.532 | 5,301,980  | 4,116,261   | 207,534   |
| 93001        | Chippewa R. at Chippewa Falls                      | 7050005 | WI | 44.93001 | -91.397  | 14,346.7  | 10/6/1970  | 1/11/2005  | 137 | 0.905 | 0.868 | 3,794,112  | 4,254,691   | 114,346   |
| AR01         | Alligehny River at Aspinwall, PA (rmi -7.4)        | 5010009 | PA | 40.48684 | -79.9049 | 30,097.8  | 7/18/2002  | 7/5/2006   | 24  | 1.325 | 1.239 |            |             |           |
| ATH 02       | S Fork Saline R.                                   | 5140204 | IL | 37.67973 | -88.8037 | 212.7     | 6/9/1993   | 12/16/1993 | 4   | 1.475 | 0.850 |            |             |           |
| CAS0479      | CASSELMAN R. CROS. BY RIVER RD. AT USGS STA.       | 5020006 | MD | 39.70389 | -79.14   | 165.2     | 1/7/1985   | 8/4/1998   | 92  | 0.900 | 0.870 | 104,664    | 113,417     | 4,828     |
| GMW020-0001  | Greens Fk                                          | 5080003 | IN | 39.77167 | -85.1092 | 223.4     | 3/19/1997  | 9/23/2003  | 60  | 3.737 | 3.400 | 492,070    | 809,110     | 41,468    |
| GMW040-0005  | Whitewater River                                   | 5080003 | IN | 39.49806 | -85.1825 | 1,497.0   | 3/18/1997  | 3/1/2006   | 88  | 3.558 | 3.400 | 3,243,563  | 3,915,590   | 298,831   |
| GMW080-0001  | Whitewater River                                   | 5080003 | IN | 39.35333 | -84.9428 | 3,418.3   | 7/25/1996  | 3/1/2006   | 99  | 2.713 | 2.616 | 5,186,027  | 6,976,412   | 314,333   |
| K3250000     | S FORK NEW RIV AT NC 16 AND 88 NR JEFFERSON        | 5050001 | NC | 36.39473 | -81.4075 | 533.6     | 4/23/1981  | 8/22/2007  | 149 | 0.812 | 0.800 | 365,716    | 323,839     | 13,836    |
| K4500000     | S FORK NEW RIV AT NC 221 NR SCOTTVILLE             | 5050001 | NC | 36.4738  | -81.3365 | 778.2     | 10/2/1974  | 8/22/2007  | 171 | 0.793 | 0.770 | 560,656    | 487,202     | 24,317    |
| K7900000     | NEW RIV AT SR 1345 AT AMELIA                       | 5050001 | NC | 36.5519  | -81.1817 | 2,141.8   | 3/15/1976  | 9/26/2007  | 236 | 0.816 | 0.780 | 1,196,112  | 1,160,056   | 49,273    |
| LEJ050-0006  | Fish Cr                                            | 4100003 | IN | 41.55861 | -84.8356 | 105.7     | 4/6/1999   | 2/6/2006   | 70  | 2.017 | 1.800 | 155,359    | 163,799     | 19,136    |
| LEJ050-0007  | Fish Cr                                            | 4100003 | IN | 41.465   | -84.8142 | 174.9     | 4/6/1999   | 2/6/2006   | 81  | 1.984 | 1.607 | 204,208    | 267,134     | 20,189    |
| LEJ060-0006  | ST Joseph River                                    | 4100003 | IN | 41.3475  | -84.8439 | 1,571.2   | 4/6/1999   | 2/6/2006   | 76  | 2.526 | 1.900 | 2,278,720  | 3,168,928   | 201,541   |

Table\_S2\_TN

|                 |                                                  |         |    |          |          |           |            |            |     |       |       |             |             |            |
|-----------------|--------------------------------------------------|---------|----|----------|----------|-----------|------------|------------|-----|-------|-------|-------------|-------------|------------|
| LEJ090-0008     | Cedar Cr                                         | 4100003 | IN | 41.21889 | -85.0767 | 785.3     | 4/6/1999   | 7/9/2001   | 28  | 3.504 | 2.500 | 2,502,687   | 1,797,858   | 461,735    |
| LEJ090-0026     | Cedar Cr                                         | 4100003 | IN | 41.215   | -85.0514 | 787.7     | 8/27/2001  | 1/23/2006  | 49  | 3.142 | 2.500 | 1,524,502   | 1,805,711   | 177,454    |
| LEJ100-0003     | ST Joseph River                                  | 4100003 | IN | 41.08917 | -85.1292 | 2,808.5   | 11/15/1983 | 1/23/2006  | 237 | 3.121 | 2.650 | 3,652,656   | 5,962,107   | 237,081    |
| LEM010-0012     | Maumee River                                     | 4100005 | IN | 41.08194 | -85.1147 | 4,855.0   | 2/22/1977  | 1/23/2006  | 107 | 3.911 | 3.400 | 11,068,160  | 17,847,825  | 1,084,898  |
| LEM010-0013     | Maumee River                                     | 4100005 | IN | 41.16906 | -84.8493 | 5,223.8   | 4/7/1971   | 1/23/2006  | 299 | 4.771 | 4.100 | 10,968,103  | 19,938,835  | 520,726    |
| LEM010-0014     | Maumee River                                     | 4100005 | IN | 41.08444 | -85.0206 | 4,962.3   | 2/22/1977  | 1/23/2006  | 304 | 4.956 | 4.500 | 10,297,824  | 19,273,125  | 488,628    |
| LES040-0007     | St. Mary's River                                 | 4100004 | IN | 40.77917 | -84.8422 | 1,305.6   | 1/9/1980   | 2/7/2006   | 161 | 5.644 | 5.000 | 6,100,027   | 8,709,466   | 512,783    |
| LES060-0004     | ST Mary's River                                  | 4100004 | IN | 41.08389 | -85.1358 | 2,042.1   | 1/7/1986   | 1/23/2006  | 219 | 5.535 | 4.900 | 7,189,170   | 11,883,735  | 556,088    |
| LES060-0005     | ST Mary's River                                  | 4100004 | IN | 40.99111 | -85.1169 | 1,847.3   | 4/6/1999   | 1/23/2006  | 70  | 5.412 | 4.800 | 7,518,948   | 11,589,412  | 832,341    |
| LMG050-0006     | Salt Cr                                          | 4040001 | IN | 41.59972 | -87.1464 | 192.5     | 6/29/1999  | 1/30/2006  | 72  | 3.161 | 3.000 | 228,521     | 269,890     | 12,326     |
| LMG050-0007     | Salt Cr                                          | 4040001 | IN | 41.49861 | -87.1417 | 92.1      | 9/9/1976   | 9/4/2003   | 107 | 3.686 | 3.500 | 130,334     | 164,361     | 8,148      |
| LMG060-0008     | E Br Little Calumet River                        | 4040001 | IN | 41.61694 | -87.1261 | 179.7     | 10/6/1976  | 1/30/2006  | 137 | 1.896 | 1.700 | 169,105     | 194,201     | 9,417      |
| LMJ120-0009     | Pigeon River                                     | 4050001 | IN | 41.74    | -85.5569 | 875.4     | 4/15/1999  | 2/8/2006   | 82  | 2.241 | 2.100 | 904,596     | 1,284,123   | 36,575     |
| LMJ150-0004     | ST Joseph River                                  | 4050001 | IN | 41.72278 | -85.8147 | 6,387.9   | 1/5/1977   | 2/8/2006   | 291 | 2.626 | 2.400 | 6,258,606   | 7,300,182   | 159,624    |
| LMJ190-0006     | Elkhart River                                    | 4050001 | IN | 41.50778 | -85.7594 | 867.9     | 4/14/1999  | 2/8/2006   | 79  | 2.545 | 2.300 | 960,007     | 1,558,999   | 41,813     |
| LMJ210-0008     | Elkhart River                                    | 4050001 | IN | 41.68778 | -85.9722 | 1,792.2   | 1/5/1977   | 2/8/2006   | 259 | 3.053 | 2.500 | 2,270,760   | 3,084,407   | 75,752     |
| LMJ240-0008     | ST Joseph River                                  | 4050001 | IN | 41.74444 | -86.2728 | 9,395.8   | 1/5/1977   | 12/19/2002 | 255 | 3.032 | 2.700 | 10,926,583  | 12,277,355  | 436,153    |
| LMJ240-0009     | ST Joseph River                                  | 4050001 | IN | 41.67111 | -86.1536 | 9,151.7   | 9/21/1989  | 5/9/2002   | 36  | 2.399 | 2.300 | 8,184,896   | 11,879,627  | 270,058    |
| LMJ240-0026     | ST Joseph River                                  | 4050001 | IN | 41.66639 | -86.1678 | 9,155.3   | 6/19/2002  | 2/8/2006   | 44  | 2.457 | 2.250 | 9,754,804   | 11,880,025  | 482,316    |
| LRFB-.5-BB14A71 | BIG FORK RIVER BRIDGE ON MN-11, 4 MI E OF LOMAN  | 9030006 | MN | 48.5125  | -93.71   | 3,884.3   | 9/22/1971  | 9/9/1992   | 71  | 1.230 | 1.120 | 997,109     | 737,181     | 50,052     |
| LRLF7.5-BB14A71 | LITTLE FORK R MN-11 BRIDGE, 0.5 MI W OF PELLAND  | 9030005 | MN | 48.52132 | -93.5866 | 4,718.2   | 9/22/1971  | 9/9/1992   | 65  | 1.270 | 1.180 | 1,585,562   | 796,609     | 97,805     |
| LSSL-52-BC15E53 | ST. LOUIS R BRIDGE ON US-2, 2 MI SE OF BROOKSTON | 4010201 | MN | 46.84944 | -92.5758 | 8,425.6   | 10/19/1970 | 9/13/1994  | 217 | 1.184 | 0.995 | 2,483,704   | 1,270,233   | 106,646    |
| LY00004         | LIT. YOUGH. R. OLD FOOT BR. 0.4M. AB. MOUTH      | 5020006 | MD | 39.41831 | -79.4192 | 105.7     | 5/7/1981   | 12/5/1995  | 87  | 1.676 | 1.695 | 114,086     | 97,841      | 7,397      |
| M03P19          | E FK TODD FORK AT CLARKSVILLE - SR 133/132       | 5090202 | OH | 39.39861 | -83.9831 | 98.8      | 12/10/1981 | 9/10/1998  | 55  | 3.938 | 3.660 | 268,896     | 299,888     | 49,500     |
| MNCO-.5-B-14A67 | COTTONWOOD R AT MN-15, 0.5 MI SE OF NEW ULM      | 7020008 | MN | 44.28237 | -94.4356 | 3,372.6   | 10/6/1970  | 9/26/1994  | 183 | 4.816 | 3.680 | 9,989,724   | 5,276,080   | 876,432    |
| MNMN-91-BB15E71 | MINNESOTA RIVER AT BRIDGE ON MN-22 AT ST. PETER  | 7020007 | MN | 44.30742 | -93.9596 | 36,896.9  | 9/13/1971  | 9/26/1994  | 214 | 6.208 | 5.620 | 65,168,696  | 50,489,494  | 3,748,247  |
| MR01            | Monongahela River near South Pittsburgh, PA      | 5020005 | PA | 40.41026 | -79.953  | 19,078.0  | 7/6/1976   | 9/7/2004   | 264 | 1.540 | 1.420 | 11,876,182  | 11,920,373  | 769,775    |
| MS216           | PRAIRIE CR AT 310TH ST .2 MI UPSTM OF L BYLLESBY | 7040002 | MN | 44.50056 | -92.9925 | 196.5     | 9/7/1989   | 9/15/1994  | 47  | 6.032 | 5.730 | 355,208     | 381,431     | 27,022     |
| MSCW-.2-B-14A53 | CROW RIVER AT BRIDGE ON CSAH-36 AT DAYTON        | 7010203 | MN | 45.24471 | -93.522  | 6,685.9   | 11/3/1970  | 6/25/1998  | 121 | 3.244 | 2.945 | 5,869,744   | 8,779,526   | 559,050    |
| MSRM-.6-BB14A53 | RUM RIVER AT BRIDGE ON PLEASANT STREET IN ANOKA  | 7010207 | MN | 45.2066  | -93.3867 | 4,055.4   | 10/5/1970  | 9/7/1994   | 90  | 1.374 | 1.300 | 1,049,025   | 1,630,066   | 52,603     |
| MSRM-34-BB14A55 | RUM RIVER BRIDGE ON CSAH-5, 0.5 MI W OF ISANTI   | 7010207 | MN | 45.49333 | -93.2669 | 3,314.8   | 6/7/1974   | 9/7/1994   | 198 | 1.367 | 1.300 | 846,490     | 1,275,048   | 26,529     |
| MSU--68CBB15E53 | MISSISSIPPI R UPSTREM OF MN-15 BR AT SAUK RAPIDS | 7010201 | MN | 45.59813 | -94.1879 | 30,255.0  | 9/21/1988  | 9/7/1994   | 54  | 1.072 | 1.020 | 5,400,424   | 6,804,474   | 223,592    |
| MSU-859--01E53  | MISSISSIPPI R MPLS WATERWORKS INTAKE AT FRIDLEY  | 7010206 | MN | 45.04917 | -93.2792 | 47,566.3  | 10/5/1970  | 9/7/1994   | 218 | 1.481 | 1.410 | 13,563,552  | 21,347,034  | 294,006    |
| MSU-982CBB15E67 | MISSISSIPPI RIVER AT BR ON MN-115 AT CAMP RIPLEY | 7010104 | MN | 46.07472 | -94.3344 | 26,472.7  | 11/4/1970  | 9/29/1994  | 206 | 0.995 | 0.940 | 5,110,469   | 4,326,499   | 140,796    |
| MSU1186-BB15E67 | MISSISSIPPI R AT MN-6 BRIDGE 8 MI SW OF COHASSET | 7010101 | MN | 47.22955 | -93.7572 | 7,549.5   | 10/19/1970 | 9/27/1994  | 195 | 0.855 | 0.815 | 1,003,338   | 246,279     | 32,665     |
| MSU1292-BB15E67 | MISSISSIPPI R AT BR ON CSAH-8 7 MI E OF BEMIDJI  | 7010101 | MN | 47.45333 | -94.7122 | 1,639.3   | 9/22/1987  | 9/27/1994  | 53  | 0.731 | 0.670 | 122,856     | 164,332     | 9,939      |
| MU01            | Muskingum River near Devola, OH                  | 5040004 | OH | 39.47028 | -81.4911 | 20,773.8  | 7/8/1976   | 9/18/2007  | 221 | 2.290 | 2.210 | 22,296,615  | 19,092,812  | 1,314,496  |
| NF01            | Ohio River near Stratton, OH                     | 5030101 | WV | 40.52754 | -80.6259 | 61,752.2  | 7/16/2002  | 9/17/2007  | 31  | 1.507 | 1.425 | 57,083,730  | 47,995,385  | 4,620,017  |
| NF03            | Great Miami River near Elizabethtown, OH         | 5080002 | OH | 39.15326 | -84.7952 | 13,864.7  | 6/19/1975  | 9/14/2007  | 267 | 4.404 | 4.280 | 19,695,327  | 30,889,325  | 1,251,190  |
| NF04            | Green River near Quinn Landing, KY               | 5110005 | KY | 37.6473  | -87.4956 | 21,392.3  | 10/11/1976 | 9/13/2007  | 255 | 1.585 | 1.480 | 19,471,305  | 27,027,433  | 999,984    |
| OBS140-0004     | Blue River                                       | 5140104 | IN | 38.43389 | -86.1917 | 724.9     | 10/16/1985 | 3/2/2006   | 103 | 2.616 | 2.530 | 1,380,881   | 1,014,142   | 107,347    |
| OBS150-0008     | Blue River                                       | 5140104 | IN | 38.22056 | -86.2983 | 1,286.6   | 4/7/1999   | 2/8/2006   | 81  | 2.372 | 2.400 | 2,062,040   | 1,530,947   | 118,786    |
| OR15            | Ohio River near Louisville, KY                   | 5140101 | KY | 38.28244 | -85.7039 | 235,672.3 | 10/12/1976 | 9/18/2007  | 268 | 1.804 | 1.720 | 204,007,764 | 218,099,355 | 7,693,802  |
| OR21            | Ohio River near Smithland, KY                    | 5140203 | KY | 37.14613 | -88.4116 | 371,652.1 | 1/19/1982  | 9/20/2007  | 110 | 1.871 | 1.790 | 479,188,761 | 473,974,896 | 34,738,541 |
| P06S08          | MAUMEE R. AT EATER RD. (RM 91.48)                | 4100005 | OH | 41.22194 | -84.6697 | 5,469.3   | 7/24/1984  | 9/30/1997  | 55  | 3.952 | 3.700 | 9,152,250   | 20,697,423  | 748,099    |
| PR1002          | TUG FORK AT KERMIT, W. VA.                       | 5070201 | WV | 37.838   | -82.4096 | 3,309.5   | 2/19/1985  | 9/21/2006  | 193 | 0.820 | 0.762 | 1,620,251   | 1,013,985   | 132,872    |
| PR1003          | TUG FORK AT STATE LINE                           | 5070201 | WV | 37.56611 | -82.1439 | 2,127.2   | 3/27/1979  | 9/21/2006  | 102 | 0.592 | 0.552 | 852,954     | 580,808     | 125,934    |
| PR1008          | SOUTH FORK CUMBERLAND RIVER AT BLUE HERON        | 5130104 | KY | 36.67028 | -84.5489 | 2,463.2   | 10/12/1983 | 8/22/2006  | 74  | 0.353 | 0.319 | 785,125     | 1,637,637   | 200,719    |
| PR1010          | ROCKCASTLE RIVER AT BILLOWS                      | 5130102 | KY | 37.17139 | -84.2967 | 1,558.2   | 3/20/1979  | 6/19/2006  | 254 | 0.603 | 0.573 | 574,875     | 946,572     | 39,949     |
| PR1014          | ROUGH RIVER NEAR DUNDEE                          | 5110004 | KY | 37.56278 | -86.7708 | 1,991.8   | 6/20/1979  | 12/12/2006 | 176 | 1.211 | 1.124 | 1,148,940   | 1,710,301   | 63,099     |
| PR1021          | NOLIN RIVER AT WHITE MILLS                       | 5110001 | KY | 37.55502 | -86.0319 | 919.4     | 3/25/1980  | 10/18/2006 | 257 | 3.100 | 3.102 | 1,507,351   | 1,753,355   | 57,232     |
| PR1024          | KENTUCKY RIVER AT FRANKFORT                      | 5100205 | KY | 38.21286 | -84.8726 | 14,045.3  | 3/13/1979  | 1/19/2006  | 269 | 1.117 | 1.041 | 7,457,412   | 8,870,432   | 406,157    |
| PR1025          | KENTUCKY RIVER AT CAMP NELSON                    | 5100205 | KY | 37.76917 | -84.6172 | 11,732.2  | 1/23/1980  | 2/20/1997  | 194 | 1.001 | 0.895 | 5,513,831   | 6,372,141   | 263,628    |
| PR1030          | POND CREEK NEAR LOUISVILLE                       | 5140102 | KY | 38.11998 | -85.796  | 166.9     | 1/18/1979  | 4/9/1998   | 218 | 3.853 | 3.340 | 253,631     | 168,649     | 15,365     |
| PR1031          | NORTH FORK KENTUCKY RIVER AT JACKSON             | 5100201 | KY | 37.55111 | -83.3844 | 2,853.8   | 4/19/1984  | 9/19/2006  | 204 | 0.698 | 0.661 | 1,104,778   | 918,228     | 76,317     |
| PR1034          | SOUTH ELKHORN CREEK NEAR MIDWAY                  | 5100205 | KY | 38.14139 | -84.6453 | 272.0     | 4/12/1984  | 5/19/1999  | 162 | 7.349 | 6.612 | 980,162     | 532,547     | 62,835     |
| PR1043          | LITTLE RIVER NEAR CADIZ                          | 5130205 | KY | 36.84056 | -87.7775 | 697.5     | 10/15/1985 | 8/9/2006   | 185 | 3.404 | 3.396 | 1,505,147   | 1,238,485   | 77,634     |
| PR1046          | RED RIVER AT CLAY CITY                           | 5100204 | KY | 37.86528 | -83.9333 | 938.4     | 10/17/1985 | 5/12/2006  | 175 | 0.590 | 0.499 | 318,035     | 541,738     | 31,554     |
| PR1048          | TYGARTS CREEK NEAR LYNN                          | 5090103 | KY | 38.59997 | -82.9524 | 714.8     | 11/14/1985 | 7/18/2006  | 190 | 0.719 | 0.638 | 259,566     | 397,194     | 18,814     |
| PR1049          | LITTLE SANDY RIVER NEAR ARGILLITE                | 5090104 | KY | 38.49056 | -82.8342 | 1,397.8   | 11/14/1985 | 7/18/2006  | 192 | 0.846 | 0.784 | 509,374     | 719,741     | 27,813     |

Table\_S2\_TN

|                 |                                                    |         |    |          |          |           |            |            |     |       |       |             |             |           |
|-----------------|----------------------------------------------------|---------|----|----------|----------|-----------|------------|------------|-----|-------|-------|-------------|-------------|-----------|
| PRI051          | HORSE LICK CREEK NEAR LAMERO                       | 5130102 | KY | 37.32012 | -84.1385 | 159.7     | 10/20/1992 | 6/19/2006  | 98  | 0.357 | 0.305 | 35,733      | 84,843      | 5,459     |
| PRI052          | SALT RIVER NEAR GLENSBORO                          | 5140102 | KY | 38.00222 | -85.0597 | 445.5     | 5/16/1989  | 12/19/2006 | 177 | 2.147 | 2.116 | 833,689     | 627,795     | 74,080    |
| PRI055          | GREEN RIVER NEAR LIVERMORE                         | 5110003 | KY | 37.4782  | -87.1269 | 15,743.0  | 7/10/1991  | 12/12/2006 | 137 | 1.540 | 1.453 | 13,685,309  | 20,198,834  | 661,863   |
| PRI058          | KENTUCKY RIVER NEAR TRAPP                          | 5100204 | KY | 37.84667 | -84.0811 | 8,383.3   | 2/13/1991  | 11/20/2006 | 128 | 0.544 | 0.518 | 2,665,876   | 3,367,537   | 196,939   |
| PRI060          | NORTH FORK LICKING RIVER NEAR MILFORD              | 5100101 | KY | 38.5812  | -84.1656 | 738.5     | 7/15/1991  | 11/30/2006 | 125 | 1.550 | 1.374 | 904,457     | 856,263     | 98,300    |
| PRI061          | LICKING RIVER AT CLAYSVILLE                        | 5100101 | KY | 38.52056 | -84.1833 | 5,097.3   | 2/21/1991  | 9/27/2006  | 78  | 0.828 | 0.727 | 2,628,117   | 3,620,546   | 207,469   |
| PRI064          | LEVISA FORK AT LOUISA                              | 5070203 | KY | 38.08056 | -82.6003 | 6,001.1   | 6/26/1991  | 11/16/2006 | 122 | 0.681 | 0.660 | 1,902,744   | 1,810,692   | 120,419   |
| PRI067          | KENTUCKY RIVER AT HIGH BRIDGE                      | 5100205 | KY | 37.81914 | -84.7065 | 11,888.7  | 11/18/1997 | 9/18/2006  | 53  | 0.943 | 0.929 | 4,708,948   | 6,576,879   | 270,111   |
| PRI069          | RED RIVER NEAR KEYSBURG                            | 5130206 | TN | 36.64081 | -86.9791 | 1,226.3   | 6/10/1998  | 9/19/2006  | 44  | 4.395 | 4.558 | 2,834,143   | 2,790,711   | 203,672   |
| PRI077          | RUSSELL CREEK NEAR GRESHAM                         | 5110001 | KY | 37.16781 | -85.4702 | 685.4     | 6/8/1998   | 9/19/2006  | 55  | 1.334 | 1.153 | 1,512,938   | 1,174,890   | 471,347   |
| PRI086          | CUMBERLAND RIVER AT CALVIN                         | 5130101 | KY | 36.72214 | -83.6255 | 1,345.6   | 7/23/1998  | 9/19/2005  | 37  | 0.506 | 0.426 | 683,689     | 587,347     | 114,235   |
| PRI087          | CLEAR FORK NEAR WILLIAMSBURG                       | 5130101 | KY | 36.72589 | -84.1424 | 918.6     | 7/8/1998   | 8/18/2004  | 34  | 0.346 | 0.309 | 172,017     | 419,522     | 49,319    |
| PRI092          | GOOSE CREEK NEAR ONEIDA                            | 5100203 | KY | 37.23703 | -83.671  | 663.0     | 6/10/1998  | 9/19/2006  | 38  | 0.580 | 0.581 | 265,767     | 280,762     | 80,442    |
| PRI100          | FLOYDS FORK NEAR SHEPHERDSVILLE                    | 5140102 | KY | 38.035   | -85.6594 | 673.7     | 6/16/1998  | 12/19/2006 | 57  | 1.820 | 1.668 | 738,023     | 720,420     | 87,605    |
| PRI102          | HINKSTON CREEK AT RUDDLES MILLS                    | 5100102 | KY | 38.30461 | -84.2379 | 671.3     | 7/28/1998  | 9/27/2006  | 52  | 1.819 | 1.545 | 1,020,327   | 746,858     | 167,796   |
| PRI105          | BRASHEARS CREEK AT TAYLORSVILLE                    | 5140102 | KY | 38.03722 | -85.3406 | 672.8     | 8/11/1998  | 12/19/2006 | 48  | 1.765 | 1.455 | 2,141,090   | 1,037,048   | 343,141   |
| PRI111          | LICKING RIVER AT BUTLER                            | 5100101 | KY | 38.78969 | -84.3675 | 8,767.4   | 4/20/1999  | 9/27/2006  | 47  | 1.132 | 0.992 | 6,425,148   | 7,518,928   | 1,148,093 |
| R12P02          | KOKOSING R AT TILDEN AVE GAGE - MT. VERNON         | 5040003 | OH | 40.40556 | -82.4997 | 522.3     | 8/15/1974  | 1/17/1997  | 84  | 1.853 | 1.630 | 563,133     | 862,486     | 35,462    |
| RR0T--1---10A53 | OTTER TAIL R BRIDGE ON 4TH ST N AT BRECKENRIDGE    | 9020103 | MN | 46.26722 | -96.5897 | 4,417.0   | 10/20/1970 | 9/29/1994  | 221 | 1.369 | 1.205 | 747,107     | 1,557,144   | 35,410    |
| RRRR296---10E53 | RED RIVER AT ALMONTE AVE S IN GRAND FORKS, ND      | 9020301 | ND | 47.90778 | -97.0256 | 47,603.4  | 10/20/1970 | 9/29/1994  | 219 | 1.879 | 1.700 | 7,619,824   | 21,680,023  | 383,295   |
| RRRR403---10E67 | RED RIVER AT BRIDGE ON CSAH-39, 1 MI W OF PERLEY   | 9020107 | MN | 47.17979 | -96.8247 | 35,883.6  | 10/20/1970 | 9/29/1994  | 218 | 2.200 | 1.990 | 4,957,298   | 15,138,777  | 272,861   |
| RRRR452---10E71 | RED RIVER BR ON MAIN AVE AT 3RD ST., IN MOORHEAD   | 9020104 | ND | 46.87397 | -96.7763 | 14,792.9  | 9/20/1971  | 9/29/1994  | 211 | 1.498 | 1.330 | 2,466,560   | 7,120,476   | 113,056   |
| S000-040        | MINNESOTA RIVER AT MN-19 BRIDGE AT HENDERSON       | 7020012 | MN | 44.52942 | -93.9008 | 38,613.0  | 10/6/1970  | 9/26/1994  | 222 | 6.187 | 5.405 | 71,172,140  | 55,649,337  | 4,280,542 |
| S000-047        | STRAIGHT R NEAR CSAH-1 1 MI SE OF CLINTON FALLS    | 7040002 | MN | 44.12414 | -93.229  | 654.5     | 8/11/1977  | 8/23/2005  | 155 | 6.590 | 6.425 | 1,531,794   | 1,773,172   | 151,475   |
| S000-054        | MINNESOTA R CSAH-24 BRIDGE, 1 MI S OF COURTLAND    | 7020007 | MN | 44.25444 | -94.3414 | 26,385.1  | 10/6/1970  | 9/26/1994  | 220 | 3.939 | 3.100 | 27,191,539  | 25,678,105  | 1,349,338 |
| S000-055        | MINNESOTA R BRIDGE ON CSAH-21, 3 MI NE OF DELHI    | 7020004 | MN | 44.6195  | -95.1779 | 18,904.8  | 7/17/2001  | 8/8/2001   | 2   | 3.196 | 2.980 |             |             |           |
| S000-056        | ST. CROIX R AT MN-48 BR, 3.5 MI W OF DANBURY, WI   | 7030001 | MN | 46.01253 | -92.444  | 5,917.6   | 10/23/1970 | 9/20/2007  | 201 | 0.712 | 0.650 | 1,076,354   | 1,206,737   | 67,084    |
| S000-095        | MISSISSIPPI R LOCK & DAM #6 AT TREMPALEAU, WIS     | 7040006 | WI | 43.99828 | -91.4391 | 149,360.1 | 10/7/1970  | 9/21/1994  | 136 | 2.466 | 2.290 | 86,771,170  | 113,217,513 | 2,785,693 |
| S000-111        | OTTER TAIL R BR ON CSAH-15 WEST OF FERGUS FALLS    | 9020103 | MN | 46.27542 | -96.1344 | 4,032.5   | 10/18/1982 | 12/9/2002  | 54  | 0.997 | 0.930 | 508,464     | 834,133     | 30,542    |
| S000-121        | KETTLE R BRIDGE ON MN-48, 4.5 MI E OF HINCKLEY     | 7030003 | MN | 46.01086 | -92.8398 | 2,556.8   | 10/23/1970 | 9/7/2007   | 220 | 0.987 | 0.950 | 714,582     | 703,492     | 38,105    |
| S000-136        | CEDAR RIVER AT CSAH-4, 3 MILES SOUTH OF AUSTIN     | 7080201 | MN | 43.60522 | -92.9845 | 1,230.6   | 10/27/1970 | 9/8/1994   | 218 | 6.803 | 6.400 | 3,538,609   | 3,410,124   | 161,770   |
| S000-156        | W FK DES MOINES R CSAH-23 BRIDGE S OF PETERSBURG   | 7100002 | MN | 43.52617 | -94.9192 | 3,291.0   | 10/14/1970 | 10/9/2002  | 130 | 4.821 | 4.650 | 6,457,899   | 3,931,525   | 459,634   |
| S000-159        | YELLOW MEDICINE R MN-67 BR 7 MI SE GRANITE FALLS   | 7020004 | MN | 44.72881 | -95.4438 | 1,616.1   | 10/15/1970 | 7/17/2001  | 129 | 2.541 | 1.728 | 1,742,734   | 1,708,914   | 202,619   |
| S000-186        | TWO RIVERS ON US-75, 1 MI N OF HALLOCK             | 9020312 | MN | 48.78925 | -96.9555 | 1,544.0   | 9/21/1971  | 6/12/2002  | 47  | 2.098 | 1.630 | 469,507     | 777,946     | 135,113   |
| S000-268        | ZUMBRO R S FORK AT CSAH-14, 3 MI N OF ROCHESTER    | 7040004 | MN | 44.1108  | -92.4475 | 871.4     | 4/6/1981   | 9/8/1994   | 127 | 6.579 | 6.420 | 1,459,374   | 1,181,187   | 38,439    |
| S000-287        | MISSISSIPPI R LOCK & DAM #5 3 MI SE OF MINNEISKA   | 7040003 | MN | 44.16011 | -91.8116 | 146,351.0 | 5/21/1974  | 9/21/1994  | 187 | 2.656 | 2.350 | 100,684,212 | 111,970,052 | 3,504,905 |
| S000-299        | REDWOOD R AT BRIDGE ON CSAH-101 AT N REDWOOD       | 7020006 | MN | 44.56572 | -95.0998 | 1,760.2   | 6/4/1974   | 9/4/2001   | 167 | 5.296 | 5.080 | 2,956,121   | 1,963,174   | 408,669   |
| S001-131        | LOST R AT CSAH-5 AT OKLEE                          | 9020305 | MN | 47.84397 | -95.8585 | 570.8     | 8/27/1987  | 7/9/2007   | 41  | 1.630 | 1.290 | 172,922     | 162,118     | 33,460    |
| S002-088        | THIEF R ON CSAH-7 BRG IN AGASSIZ NWR, 6 MI E OF HO | 9020304 | MN | 48.30045 | -96.0708 | 1,438.5   | 2/23/1993  | 10/11/2006 | 25  | 2.103 | 1.833 |             |             |           |
| S002-118        | CLEARWATER R AT KLONDIKE BRIDGE/BOTTINEAU AVE RED  | 9020305 | MN | 47.88607 | -96.2769 | 3,155.6   | 1/19/1992  | 5/2/2006   | 82  | 1.643 | 1.340 | 841,373     | 963,862     | 127,020   |
| S002-124        | CLEARWATER R AT RD IN T151R42S45W 1 MI N PLUMMER   | 9020305 | MN | 47.9233  | -96.0459 | 1,325.4   | 4/27/1992  | 9/4/2007   | 94  | 1.601 | 1.360 | 293,312     | 396,943     | 28,171    |
| S002-283        | MISSISSIPPI R AT FOREST ROUTE 2171, 9 MI NE OF CAS | 7010101 | MN | 47.44445 | -94.4252 | 2,762.7   | 3/31/2004  | 11/2/2004  | 16  | 1.281 | 1.110 |             |             |           |
| S002-365        | TWO RIVERS, S BR AT US-59 AT LAKE BRONSON          | 9020312 | MN | 48.7326  | -96.6675 | 1,210.3   | 4/8/1993   | 6/12/2002  | 4   | 1.576 | 1.436 |             |             |           |
| S002-963        | RED LK R AT 2ND AVE NE (MURRAY BRIDGE) IN EAST GRA | 9020303 | MN | 47.92372 | -97.016  | 13,535.3  | 10/20/1970 | 11/3/2004  | 247 | 1.398 | 1.260 | 2,115,828   | 3,001,687   | 120,168   |
| SL 191          | ST. LOUIS RIVER AT SH-23 BRIDGE                    | 4010201 | MN | 46.65882 | -92.2842 | 9,027.3   | 10/23/1970 | 9/12/1994  | 380 | 1.061 | 1.040 | 2,473,429   | 1,408,906   | 53,263    |
| SL 261          | ST. LOUIS R.-N.THOMSON RESERVIOR                   | 4010201 | MN | 46.66417 | -92.4049 | 8,862.7   | 6/4/1974   | 7/17/1990  | 158 | 1.053 | 1.040 | 2,350,435   | 1,376,283   | 54,769    |
| SL 303          | ST. LOUIS R. AT SCANLON HYDO DAM                   | 4010201 | MN | 46.70969 | -92.4201 | 8,661.6   | 1/29/1974  | 7/17/1990  | 179 | 1.075 | 1.035 | 2,395,905   | 1,333,860   | 55,050    |
| SL 500          | ST. LOUIS RIVER AT COUNTY RD. 31                   | 4010201 | MN | 46.86972 | -92.6028 | 6,014.7   | 6/4/1974   | 7/17/1990  | 159 | 1.181 | 1.190 | 1,823,974   | 1,045,553   | 54,020    |
| SR01            | Scioto River at Lucasville, OH                     | 5060002 | OH | 38.88111 | -83.0175 | 15,984.7  | 9/7/1976   | 9/18/2007  | 198 | 3.811 | 3.330 | 19,798,858  | 37,118,724  | 1,606,364 |
| UMI050-0006     | Iroquois River                                     | 7120002 | IN | 40.82028 | -87.4642 | 1,411.1   | 3/16/1999  | 2/15/2006  | 75  | 6.622 | 7.100 | 5,239,842   | 5,495,377   | 482,718   |
| UMK030-0002     | Kankakee River                                     | 7120001 | IN | 41.47722 | -86.6044 | 966.5     | 1/30/1980  | 11/30/2000 | 226 | 2.392 | 1.900 | 756,565     | 1,957,857   | 42,901    |
| UMK030-0020     | Kankakee River                                     | 7120001 | IN | 41.46139 | -86.6139 | 980.3     | 1/25/2001  | 2/15/2006  | 62  | 2.097 | 1.800 | 775,817     | 2,042,725   | 56,939    |
| UMK060-0001     | Yellow River                                       | 7120001 | IN | 41.3025  | -86.6014 | 1,063.8   | 3/16/1999  | 2/15/2006  | 82  | 4.772 | 4.150 | 2,810,797   | 2,665,997   | 319,715   |
| UMK080-0001     | Kankakee River                                     | 7120001 | IN | 41.21974 | -86.9687 | 3,441.1   | 3/16/1999  | 2/15/2006  | 80  | 2.779 | 2.200 | 4,515,538   | 6,741,157   | 360,818   |
| UMK090-0001     | Crooked Cr                                         | 7120001 | IN | 41.28222 | -87.0258 | 224.8     | 3/16/1999  | 2/15/2006  | 76  | 1.008 | 0.800 | 112,689     | 452,310     | 11,878    |
| V02P16          | SCIOTO R. AT WARRENSBURG - OSTRANDER RD.           | 5060001 | OH | 40.30583 | -83.1681 | 1,968.4   | 9/4/1979   | 10/2/1995  | 30  | 4.679 | 3.970 | 4,909,162   | 8,445,667   | 992,934   |
| WAE050-0001     | Eel River                                          | 5120104 | IN | 40.94806 | -85.8911 | 1,284.0   | 1/16/1985  | 2/22/2006  | 109 | 3.813 | 3.000 | 3,219,541   | 3,039,958   | 287,899   |
| WAW010-0063     | Wildcat Cr                                         | 5120107 | IN | 40.48611 | -86.1075 | 509.4     | 4/24/1974  | 2/14/2006  | 201 | 5.521 | 5.700 | 1,917,315   | 1,896,466   | 164,681   |
| WAW020-0004     | Wildcat Cr                                         | 5120107 | IN | 40.47361 | -86.1842 | 646.7     | 4/24/1974  | 2/14/2006  | 211 | 6.726 | 6.600 | 1,646,307   | 2,463,890   | 87,962    |
| WAW020-0039     | Wildcat Cr                                         | 5120107 | IN | 40.48167 | -86.53   | 981.2     | 9/23/1998  | 2/22/2006  | 89  | 4.811 | 4.200 | 2,624,308   | 3,960,416   | 193,589   |



Table\_S2\_TN

|             |                           |         |    |          |          |          |            |            |     |       |       |            |            |           |
|-------------|---------------------------|---------|----|----------|----------|----------|------------|------------|-----|-------|-------|------------|------------|-----------|
| WAW050-0005 | Wildcat Cr                | 5120107 | IN | 40.45361 | -86.8514 | 2,077.1  | 3/13/1980  | 2/22/2006  | 118 | 4.648 | 4.100 | 6,120,870  | 8,459,749  | 507,535   |
| WBU100-0001 | Wabash River              | 5120111 | IN | 39.22722 | -87.5742 | 33,226.7 | 1/16/1980  | 2/1/2006   | 297 | 4.718 | 4.600 | 70,235,610 | 95,416,759 | 2,468,853 |
| WBU160-0002 | Busseron Cr               | 5120111 | IN | 38.97389 | -87.4258 | 591.6    | 3/10/1999  | 11/12/2003 | 63  | 1.823 | 1.700 | 488,987    | 776,281    | 41,439    |
| WBU200-0003 | Wabash River              | 5120111 | IN | 38.68125 | -87.5347 | 35,672.3 | 4/2/1996   | 2/13/2006  | 96  | 4.526 | 4.600 | 76,985,736 | 99,216,087 | 3,843,579 |
| WDE010-0007 | Wabash River              | 5120105 | IN | 40.73667 | -86.505  | 9,981.3  | 1/17/1980  | 2/22/2006  | 165 | 4.560 | 4.000 | 21,540,956 | 37,667,803 | 940,423   |
| WDE060-0001 | Wabash River              | 5120105 | IN | 40.52861 | -86.7603 | 11,496.6 | 2/21/2001  | 2/22/2006  | 61  | 5.203 | 4.600 | 26,984,748 | 43,309,191 | 1,904,487 |
| WDE070-0006 | Wabash River              | 5120105 | IN | 40.49556 | -86.8233 | 16,696.8 | 1/22/1991  | 12/5/2000  | 112 | 4.863 | 4.800 | 37,973,592 | 55,202,087 | 2,236,938 |
| WED010-0005 | Big Blue River            | 5120204 | IN | 39.87361 | -85.4389 | 149.4    | 5/29/1996  | 9/23/2003  | 76  | 8.105 | 7.400 | 390,427    | 300,043    | 22,218    |
| WED050-0001 | Big Blue River            | 5120204 | IN | 39.355   | -85.9839 | 1,511.6  | 3/26/1980  | 2/9/2006   | 121 | 4.506 | 4.300 | 3,713,662  | 5,036,236  | 169,529   |
| WEF050-0002 | Flatrock River            | 5120205 | IN | 39.36361 | -85.8553 | 1,056.8  | 4/15/1999  | 3/2/2006   | 83  | 4.708 | 5.200 | 4,521,454  | 4,142,345  | 647,816   |
| WEF060-0003 | E Fk White River          | 5120205 | IN | 39.20028 | -85.9264 | 4,070.1  | 4/18/1996  | 2/8/2006   | 122 | 3.924 | 3.800 | 9,338,737  | 13,208,072 | 363,833   |
| WEL040-0003 | E Fk White River          | 5120208 | IN | 38.82583 | -86.5133 | 10,459.6 | 5/12/1980  | 2/21/2006  | 114 | 2.863 | 2.800 | 20,601,967 | 23,494,902 | 1,105,173 |
| WEL100-0002 | E Fk White River          | 5120208 | IN | 38.80194 | -86.645  | 12,221.4 | 2/10/1977  | 2/21/2006  | 304 | 2.725 | 2.500 | 18,617,367 | 24,525,655 | 737,391   |
| WEL170-0001 | E Fk White River          | 5120208 | IN | 38.53917 | -87.2231 | 14,877.0 | 1/15/1980  | 2/28/2006  | 193 | 2.595 | 2.500 | 22,205,470 | 28,056,803 | 892,823   |
| WEM070-0001 | Vernon Fk Muscatatuck Riv | 5120207 | IN | 38.97639 | -85.62   | 516.4    | 7/9/1998   | 3/1/2006   | 103 | 2.192 | 2.100 | 564,897    | 904,941    | 57,775    |
| WEU040-0001 | E Fk White River          | 5120206 | IN | 38.98722 | -85.8989 | 6,043.9  | 2/9/1977   | 2/9/2006   | 198 | 4.075 | 4.100 | 15,551,643 | 17,732,545 | 595,663   |
| WLV030-0003 | Wabash River              | 5120108 | IN | 40.41194 | -87.0364 | 19,508.1 | 2/2/1977   | 2/2/2006   | 296 | 4.858 | 4.800 | 46,089,461 | 65,689,218 | 1,589,961 |
| WLV080-0003 | Wabash River              | 5120108 | IN | 40.255   | -87.2997 | 21,085.4 | 3/15/1999  | 2/2/2006   | 81  | 5.008 | 4.900 | 51,238,125 | 68,698,002 | 2,632,564 |
| WLV140-0001 | Wabash River              | 5120108 | IN | 39.95167 | -87.4192 | 25,311.8 | 1/16/1980  | 2/1/2006   | 148 | 4.959 | 4.900 | 60,391,776 | 78,471,763 | 2,378,972 |
| WLV150-0001 | Wabash River              | 5120108 | IN | 39.79222 | -87.3744 | 28,903.1 | 6/29/1982  | 2/1/2006   | 90  | 5.135 | 4.950 | 68,626,594 | 87,258,697 | 3,275,212 |
| WLV160-0001 | Big Raccoon Cr            | 5120108 | IN | 39.79028 | -86.9586 | 456.5    | 3/29/1999  | 2/1/2006   | 82  | 4.122 | 3.750 | 1,960,552  | 1,374,930  | 226,888   |
| WLV190-0012 | Big Raccoon Cr            | 5120108 | IN | 39.72917 | -87.325  | 1,229.2  | 4/28/1999  | 2/1/2006   | 82  | 2.581 | 2.350 | 1,594,946  | 2,263,060  | 99,038    |
| WLV200-0001 | Wabash River              | 5120108 | IN | 39.65639 | -87.3956 | 30,428.1 | 2/3/1977   | 2/1/2006   | 154 | 4.828 | 4.800 | 70,637,862 | 90,009,391 | 2,989,675 |
| WMI060-0004 | Mississinewa River        | 5120103 | IN | 40.62806 | -85.7358 | 1,838.7  | 2/22/1977  | 2/14/2006  | 157 | 4.407 | 3.900 | 4,166,465  | 7,738,103  | 279,980   |
| WMI060-0005 | Mississinewa River        | 5120103 | IN | 40.57611 | -85.6597 | 1,751.4  | 2/22/1977  | 2/14/2006  | 258 | 4.115 | 3.746 | 4,585,766  | 7,324,321  | 322,001   |
| WMI060-0006 | Mississinewa River        | 5120103 | IN | 40.74917 | -86.0119 | 2,103.8  | 5/3/1995   | 2/22/2006  | 97  | 4.159 | 4.072 | 4,549,023  | 8,544,423  | 384,416   |
| WPA040-0003 | Patoka River              | 5120209 | IN | 38.32972 | -86.9664 | 1,126.3  | 3/2/1977   | 2/27/2006  | 146 | 3.030 | 2.700 | 1,784,928  | 1,597,360  | 152,161   |
| WPA060-0002 | Patoka River              | 5120209 | IN | 38.3825  | -87.3333 | 1,688.0  | 6/26/1996  | 2/27/2006  | 99  | 2.782 | 2.400 | 3,117,123  | 2,595,523  | 282,401   |
| WQN0001     | GENESEE RIVER             | 4130002 | PA | 41.9942  | -77.8703 | 222.1    |            |            |     |       |       |            |            |           |
| WQN0643     | CONNEAUT CREEK            | 4120101 | PA | 41.918   | -80.4692 | 398.2    |            |            |     |       |       |            |            |           |
| WQN0702     | MONONGAHELA RIVER         | 5020005 | PA | 40.1519  | -79.9042 | 13,502.5 | 10/26/1978 | 10/5/1987  | 42  | 1.173 | 1.066 | 10,074,225 | 7,674,910  | 738,509   |
| WQN0726     | CASSELLMAN RIVER          | 5020006 | PA | 39.7325  | -79.1009 | 193.7    |            |            |     |       |       |            |            |           |
| WQN0801     | ALLEGHENY RIVER           | 5010009 | PA | 40.52745 | -79.846  | 29,846.8 |            |            |     |       |       |            |            |           |
| WQN0802     | ALLEGHENY RIVER           | 5010006 | PA | 40.7611  | -79.5458 | 23,274.4 | 10/31/1978 | 5/6/1993   | 102 | 0.986 | 0.906 | 15,118,525 | 15,088,033 | 750,193   |
| WQN0807     | ALLEGHENY RIVER           | 5010001 | PA | 41.965   | -78.3861 | 1,422.6  |            |            |     |       |       |            |            |           |
| WQN0843     | CLARION RIVER             | 5010005 | PA | 41.1296  | -79.5548 | 3,003.1  |            |            |     |       |       |            |            |           |
| WQN0845     | FRENCH CREEK              | 5010004 | PA | 41.402   | -79.8316 | 3,187.4  |            |            |     |       |       |            |            |           |
| WQN0846     | FRENCH CREEK              | 5010004 | PA | 41.5893  | -80.1502 | 2,094.4  |            |            |     |       |       |            |            |           |
| WQN0861     | MAHONING CREEK            | 5010006 | PA | 40.9221  | -79.0064 | 411.4    |            |            |     |       |       |            |            |           |
| WQN0867     | ALLEGHENY RIVER           | 5010003 | PA | 41.2638  | -79.8415 | 16,226.1 |            |            |     |       |       |            |            |           |
| WQN0869     | FRENCH CREEK              | 5010004 | PA | 41.7717  | -80.1076 | 1,542.2  |            |            |     |       |       |            |            |           |
| WQN0901     | OHIO RIVER                | 5030101 | OH | 40.62058 | -80.5589 | 60,905.2 | 8/20/1975  | 9/9/1986   | 2   | 1.828 | 1.828 |            |            |           |
| WQN0902     | OHIO RIVER                | 5030101 | PA | 40.533   | -80.1881 | 50,462.4 |            |            |     |       |       |            |            |           |
| WSA020-0002 | Salamonie River           | 5120102 | IN | 40.55917 | -85.2786 | 657.7    | 7/28/1998  | 2/13/2006  | 83  | 4.403 | 3.900 | 1,925,210  | 2,622,052  | 252,130   |
| WSA040-0001 | Salamonie River           | 5120102 | IN | 40.82972 | -85.7189 | 1,452.7  | 6/5/1980   | 2/22/2006  | 114 | 4.483 | 4.200 | 2,895,907  | 5,010,103  | 245,307   |
| WSA040-0005 | Salamonie River           | 5120102 | IN | 40.74167 | -85.5089 | 1,154.5  | 10/4/1971  | 2/13/2006  | 178 | 4.141 | 3.500 | 3,678,800  | 4,779,341  | 482,994   |
| WSU020-0003 | Sugar Cr                  | 5120110 | IN | 40.14333 | -86.6958 | 749.7    | 3/15/1999  | 2/2/2006   | 81  | 5.919 | 5.625 | 3,527,420  | 2,103,134  | 394,200   |
| WSU050-0002 | Sugar Cr                  | 5120110 | IN | 40.05    | -86.9225 | 1,338.7  | 3/15/1999  | 2/2/2006   | 83  | 5.757 | 5.300 | 4,710,264  | 4,208,369  | 445,826   |
| WSU050-0005 | Sugar Cr                  | 5120110 | IN | 39.94611 | -87.0586 | 1,721.4  | 6/29/1982  | 2/1/2006   | 83  | 4.811 | 4.400 | 6,306,744  | 5,075,866  | 634,509   |
| WTI050-0009 | Tippecanoe River          | 5120106 | IN | 41.09417 | -86.2403 | 1,629.7  | 7/22/1991  | 2/8/2006   | 97  | 2.978 | 2.800 | 2,687,596  | 2,898,706  | 141,341   |
| WTI080-0001 | Tippecanoe River          | 5120106 | IN | 41.00667 | -86.6028 | 2,695.6  | 3/25/1998  | 2/15/2006  | 94  | 3.149 | 2.735 | 5,020,604  | 5,460,680  | 414,391   |
| WTI150-0011 | Tippecanoe River          | 5120106 | IN | 40.59389 | -86.7708 | 4,868.3  | 1/20/1998  | 2/22/2006  | 99  | 3.610 | 3.100 | 9,314,723  | 10,795,175 | 636,575   |
| WUW060-0002 | Wabash River              | 5120101 | IN | 40.61667 | -84.965  | 1,233.8  | 1/27/1998  | 12/2/2002  | 60  | 7.333 | 6.500 | 6,689,760  | 6,814,731  | 981,376   |
| WUW070-0002 | Wabash River              | 5120101 | IN | 40.81944 | -85.3425 | 1,661.0  | 8/19/1992  | 1/21/2003  | 62  | 7.906 | 7.100 | 6,923,129  | 8,931,989  | 1,319,584 |
| WUW090-0001 | Wabash River              | 5120101 | IN | 40.85833 | -85.5075 | 2,000.7  | 1/28/1998  | 1/21/2003  | 60  | 7.080 | 6.350 | 8,118,956  | 10,257,774 | 1,657,804 |
| WUW120-0002 | Little River              | 5120101 | IN | 40.89861 | -85.4133 | 702.6    | 2/25/1998  | 2/6/2006   | 91  | 4.262 | 3.550 | 2,022,914  | 2,395,413  | 217,519   |
| WUW140-0001 | Wabash River              | 5120101 | IN | 40.86889 | -85.6019 | 2,987.6  | 1/10/1980  | 1/21/2003  | 120 | 6.020 | 5.150 | 7,655,810  | 13,551,179 | 818,623   |
| WUW160-0006 | Wabash River              | 5120101 | IN | 40.74222 | -86.0967 | 7,083.3  | 1/16/1973  | 2/22/2006  | 110 | 5.135 | 4.850 | 15,394,352 | 28,905,588 | 877,603   |
| WUW170-0002 | Pipe Cr                   | 5120101 | IN | 40.72167 | -86.1983 | 452.3    | 3/25/1998  | 9/9/2003   | 63  | 4.895 | 4.150 | 1,295,615  | 2,229,012  | 133,640   |
| WVE100-0001 | Vermillion River          | 5120109 | IN | 39.96139 | -87.4519 | 3,705.7  | 1/16/1980  | 2/1/2006   | 149 | 6.761 | 6.900 | 10,191,536 | 8,727,539  | 543,579   |

Table\_S2\_TN

|             |                                               |         |    |          |          |          |           |           |     |       |       |            |            |           |
|-------------|-----------------------------------------------|---------|----|----------|----------|----------|-----------|-----------|-----|-------|-------|------------|------------|-----------|
| WWE060-0004 | Mill Cr                                       | 5120203 | IN | 39.63667 | -86.6406 | 144.4    | 10/1/1974 | 9/24/2003 | 131 | 2.857 | 2.600 | 363,105    | 241,069    | 37,709    |
| WWE080-0001 | Eel River                                     | 5120203 | IN | 39.35056 | -87.0725 | 2,256.0  | 3/17/1999 | 2/1/2006  | 83  | 2.741 | 2.800 | 4,194,455  | 3,739,200  | 247,126   |
| WWE090-0001 | Eel River                                     | 5120203 | IN | 39.12423 | -86.9702 | 3,124.8  | 6/26/1996 | 2/14/2006 | 98  | 2.550 | 2.600 | 5,705,147  | 5,070,776  | 352,706   |
| WWL020-0003 | W Fk White River                              | 5120202 | IN | 39.28028 | -86.7619 | 7,765.8  | 4/2/1996  | 2/14/2006 | 119 | 4.094 | 3.800 | 12,367,978 | 20,319,289 | 524,782   |
| WWL030-0003 | W Fk White River                              | 5120202 | IN | 39.11194 | -86.9625 | 11,405.4 | 4/20/1999 | 2/14/2006 | 82  | 3.716 | 3.550 | 17,665,952 | 25,731,293 | 875,082   |
| WWL070-0003 | W Fk White River                              | 5120202 | IN | 38.795   | -87.2417 | 12,919.1 | 4/2/1996  | 2/13/2006 | 119 | 3.122 | 3.100 | 18,911,163 | 28,091,212 | 724,006   |
| WWL100-0005 | White River                                   | 5120202 | IN | 38.51167 | -87.2886 | 28,823.8 | 2/9/1977  | 2/28/2006 | 301 | 3.079 | 2.900 | 43,997,556 | 59,096,741 | 1,497,644 |
| WWU010-0001 | W Fk White River                              | 5120201 | IN | 40.17833 | -85.3422 | 581.5    | 2/24/1977 | 2/15/2006 | 175 | 2.859 | 2.300 | 1,349,240  | 2,246,696  | 118,727   |
| WWU010-0006 | W Fk White River                              | 5120201 | IN | 40.18222 | -84.9689 | 88.4     | 4/9/1980  | 9/23/2003 | 260 | 3.788 | 3.300 | 264,873    | 342,066    | 33,107    |
| WWU020-0005 | W Fk White River                              | 5120201 | IN | 40.17889 | -85.495  | 655.3    | 1/9/1980  | 2/15/2006 | 260 | 4.278 | 4.000 | 1,228,181  | 2,788,056  | 61,131    |
| WWU030-0003 | W Fk White River                              | 5120201 | IN | 40.10667 | -85.6728 | 1,059.2  | 2/24/1977 | 2/15/2006 | 264 | 3.372 | 3.000 | 1,885,798  | 3,738,397  | 84,799    |
| WWU040-0004 | W Fk White River                              | 5120201 | IN | 40.14222 | -85.8628 | 1,480.1  | 8/19/1992 | 2/13/2006 | 119 | 3.438 | 3.200 | 2,218,866  | 5,423,902  | 85,792    |
| WWU090-0002 | W Fk White River                              | 5120201 | IN | 39.91    | -86.105  | 3,182.6  | 1/22/1980 | 2/15/2006 | 185 | 4.200 | 3.900 | 6,761,876  | 11,249,214 | 275,997   |
| WWU110-0001 | Fall Cr                                       | 5120201 | IN | 39.78194 | -86.1767 | 861.3    | 12/8/1988 | 2/15/2006 | 195 | 2.532 | 2.400 | 945,300    | 1,634,962  | 47,131    |
| WWU110-0002 | Fall Cr                                       | 5120201 | IN | 39.83444 | -86.1219 | 803.5    | 1/22/1980 | 2/15/2006 | 180 | 2.185 | 1.900 | 974,227    | 1,595,261  | 57,115    |
| WWU120-0001 | Eagle Cr                                      | 5120201 | IN | 39.735   | -86.1967 | 539.3    | 1/22/1980 | 2/15/2006 | 306 | 4.461 | 4.100 | 492,796    | 725,967    | 25,542    |
| WWU120-0002 | Eagle Cr                                      | 5120201 | IN | 39.77833 | -86.2506 | 449.2    | 3/16/1989 | 2/15/2006 | 197 | 2.253 | 2.000 | 473,811    | 621,501    | 28,755    |
| WWU140-0003 | W Fk White River                              | 5120201 | IN | 39.56694 | -86.2558 | 5,259.9  | 10/6/1992 | 2/21/2006 | 153 | 5.552 | 5.117 | 9,394,952  | 16,971,854 | 441,202   |
| WWU150-0007 | White Lick Cr                                 | 5120201 | IN | 39.51361 | -86.3803 | 746.8    | 3/18/1999 | 2/21/2006 | 79  | 2.761 | 2.500 | 1,589,920  | 1,774,337  | 158,533   |
| WWU160-0004 | W Fk White River                              | 5120201 | IN | 39.43389 | -86.4494 | 6,462.6  | 2/10/1977 | 2/21/2006 | 117 | 4.464 | 4.300 | 11,083,301 | 19,265,713 | 410,612   |
| YOU925      | YOUGH. R. GA. 0.7M. UPST.FR.BR.ON RT 42 AT FD | 5020006 | MD | 39.65335 | -79.4079 | 763.6    | 1/7/1985  | 12/5/1995 | 82  | 0.918 | 0.883 | 587,470    | 458,531    | 34,499    |
| YOU1139     | YOUGH. R. N OF RT 20 BR.DOWNST.FR. LT. YOUGH. | 5020006 | MD | 39.42472 | -79.4208 | 349.7    | 9/16/1980 | 12/5/1995 | 89  | 1.303 | 1.205 | 355,562    | 276,964    | 22,092    |

Table S5\_TP. Total annual nitrogen and phosphorus loads and yields, with confidence intervals, for HUC8 watersheds of Major River Basin 3 (MRB3). Accumulated nondelivered loads and yields from each individual HUC8 (based on sum of incremental loads), and does not include loads from upstream HUC8s. Direct results from the SPARROW models: not corrected for any spatial biases.

Supplemental Material to Robertson and Saad, 2011, *Journal of the American Water Resources Association*, *Nutrient Inputs to the Laurentian Great Lakes By Source and River Basin Estimated Using SPARROW Watershed Models*.

The total load for each HUC8 watershed was calculated by summing the simulated incremental loads from each SPARROW reach within a HUC8 watershed.

Yield is load per unit area of the HUC8 watershed.  
[% , percent; CI, Confidence interval; kg, kilogram; ha, hectare]

HUC8's are based on Seaber, P.R., F.P. Kapinos, and G.L. Knapp, 1987. Hydrologic Unit maps: U.S. Geol. Surv. Water-Supply Paper 2294, 63 p. Available online at: <http://water.usgs.gov/GIS/huc.html>

| HUC8     | HUC8 NAME             | Great Lake/Basin | Phosphorus                 |                                         |                                         |                                              |                                                           |                                                           | Percent Contribution by Source |               |                      |                    |                   |                     |
|----------|-----------------------|------------------|----------------------------|-----------------------------------------|-----------------------------------------|----------------------------------------------|-----------------------------------------------------------|-----------------------------------------------------------|--------------------------------|---------------|----------------------|--------------------|-------------------|---------------------|
|          |                       |                  | Total Phosphorus Load (kg) | Lower 95% CI Total Phosphorus Load (kg) | Upper 95% CI Total Phosphorus Load (kg) | Total Phosphorus Yield (kg/km <sup>2</sup> ) | Lower 95% CI Total Phosphorus Yield (kg/km <sup>2</sup> ) | Upper 95% CI Total Phosphorus Yield (kg/km <sup>2</sup> ) | Forest, wetland, shrub         | Point sources | Urban and open areas | Fertilizers (farm) | Manure (confined) | Manure (unconfined) |
| 04010101 | Baptism-Brule         | Lake Superior    | 49,426                     | 20,259                                  | 92,171                                  | 8.46                                         | 3.47                                                      | 15.78                                                     | 96.6                           | 0.5           | 2.8                  | 0.0                | 0.0               | 0.1                 |
| 04010102 | Beaver-Lester         | Lake Superior    | 67,504                     | 26,878                                  | 116,634                                 | 39.50                                        | 15.73                                                     | 68.25                                                     | 37.1                           | 53.6          | 8.1                  | 0.2                | 0.5               | 0.5                 |
| 04010201 | St. Louis             | Lake Superior    | 116,759                    | 42,725                                  | 208,191                                 | 15.73                                        | 5.76                                                      | 28.04                                                     | 66.2                           | 14.7          | 12.5                 | 1.0                | 2.7               | 2.8                 |
| 04010202 | Cloquet               | Lake Superior    | 12,540                     | 5,158                                   | 26,323                                  | 6.32                                         | 2.60                                                      | 13.26                                                     | 91.6                           | 0.0           | 5.9                  | 0.4                | 0.9               | 1.3                 |
| 04010301 | Beartrap-Nemadji      | Lake Superior    | 101,507                    | 43,228                                  | 186,681                                 | 20.98                                        | 8.94                                                      | 38.59                                                     | 60.4                           | 12.2          | 10.6                 | 1.6                | 10.3              | 4.9                 |
| 04010302 | Bad-Montreal          | Lake Superior    | 72,580                     | 30,212                                  | 156,511                                 | 21.74                                        | 9.05                                                      | 46.88                                                     | 72.8                           | 5.9           | 8.7                  | 1.6                | 7.7               | 3.3                 |
| 04020101 | Black-Presque Isle    | Lake Superior    | 49,723                     | 20,107                                  | 110,848                                 | 18.87                                        | 7.63                                                      | 42.07                                                     | 85.0                           | 6.6           | 8.0                  | 0.0                | 0.2               | 0.2                 |
| 04020102 | Ontonagon             | Lake Superior    | 44,586                     | 17,576                                  | 86,723                                  | 12.32                                        | 4.86                                                      | 23.96                                                     | 84.7                           | 1.4           | 9.4                  | 0.4                | 2.3               | 1.8                 |
| 04020103 | Keweenaw Peninsula    | Lake Superior    | 57,880                     | 22,548                                  | 96,710                                  | 20.20                                        | 7.87                                                      | 33.75                                                     | 51.4                           | 36.4          | 10.6                 | 0.3                | 0.8               | 0.5                 |
| 04020104 | Sturgeon              | Lake Superior    | 23,496                     | 8,185                                   | 56,745                                  | 12.71                                        | 4.43                                                      | 30.70                                                     | 85.0                           | 0.0           | 9.7                  | 0.8                | 3.0               | 1.4                 |
| 04020105 | Dead-Kelsey           | Lake Superior    | 29,758                     | 10,188                                  | 63,409                                  | 12.55                                        | 4.30                                                      | 26.74                                                     | 58.6                           | 21.0          | 19.1                 | 0.1                | 0.3               | 0.9                 |
| 04020201 | Betsy-Chocolay        | Lake Superior    | 37,752                     | 13,981                                  | 65,526                                  | 12.62                                        | 4.67                                                      | 21.90                                                     | 49.4                           | 36.1          | 13.0                 | 0.2                | 0.5               | 0.7                 |
| 04020202 | Tahquamenon           | Lake Superior    | 19,148                     | 7,772                                   | 34,174                                  | 8.96                                         | 3.64                                                      | 15.99                                                     | 77.6                           | 5.8           | 15.3                 | 0.3                | 0.4               | 0.6                 |
| 04020203 | Waiska                | Lake Superior    | 13,452                     | 5,168                                   | 26,335                                  | 17.11                                        | 6.57                                                      | 33.49                                                     | 34.7                           | 44.7          | 13.2                 | 0.5                | 3.8               | 3.0                 |
| 04030101 | Manitowoc-Sheboygan   | Lake Michigan    | 347,506                    | 127,046                                 | 682,374                                 | 81.46                                        | 29.78                                                     | 159.95                                                    | 3.7                            | 21.1          | 5.6                  | 12.4               | 50.2              | 6.9                 |
| 04030102 | Door-Kewaunee         | Lake Michigan    | 123,774                    | 45,933                                  | 236,297                                 | 62.56                                        | 23.22                                                     | 119.43                                                    | 7.6                            | 18.7          | 6.5                  | 13.7               | 46.9              | 6.4                 |
| 04030103 | Duck-Pensaukee        | Lake Michigan    | 63,133                     | 23,333                                  | 113,640                                 | 48.91                                        | 18.08                                                     | 88.03                                                     | 7.0                            | 3.7           | 9.9                  | 16.2               | 54.7              | 8.5                 |
| 04030104 | Oconto                | Lake Michigan    | 59,836                     | 22,082                                  | 114,506                                 | 22.16                                        | 8.18                                                      | 42.40                                                     | 28.0                           | 4.8           | 14.0                 | 12.1               | 34.6              | 6.4                 |
| 04030105 | Peshigo               | Lake Michigan    | 41,394                     | 16,270                                  | 68,539                                  | 13.85                                        | 5.44                                                      | 22.93                                                     | 41.3                           | 6.2           | 17.5                 | 7.9                | 21.8              | 5.1                 |
| 04030106 | Brule                 | Lake Michigan    | 38,983                     | 14,245                                  | 69,146                                  | 14.33                                        | 5.24                                                      | 25.42                                                     | 78.3                           | 3.5           | 13.9                 | 1.5                | 1.6               | 1.2                 |
| 04030107 | Michigamme            | Lake Michigan    | 15,393                     | 6,640                                   | 27,885                                  | 8.40                                         | 3.63                                                      | 15.22                                                     | 84.1                           | 2.6           | 12.3                 | 0.2                | 0.2               | 0.6                 |
| 04030108 | Menominee             | Lake Michigan    | 108,862                    | 45,561                                  | 196,117                                 | 18.22                                        | 7.63                                                      | 32.83                                                     | 41.8                           | 32.7          | 14.5                 | 2.4                | 6.6               | 2.0                 |
| 04030109 | Cedar-Ford            | Lake Michigan    | 49,031                     | 16,593                                  | 96,520                                  | 18.44                                        | 6.24                                                      | 36.30                                                     | 55.0                           | 17.7          | 13.4                 | 3.0                | 8.2               | 2.8                 |
| 04030110 | Escanaba              | Lake Michigan    | 32,045                     | 13,008                                  | 59,152                                  | 13.41                                        | 5.45                                                      | 24.76                                                     | 58.5                           | 18.0          | 17.3                 | 1.6                | 3.1               | 1.5                 |
| 04030111 | Tacoosh-Whitefish     | Lake Michigan    | 21,640                     | 8,406                                   | 38,609                                  | 13.02                                        | 5.06                                                      | 23.22                                                     | 64.2                           | 8.9           | 21.6                 | 1.3                | 2.4               | 1.6                 |
| 04030112 | Fishdam-Sturgeon      | Lake Michigan    | 14,383                     | 5,758                                   | 26,302                                  | 9.56                                         | 3.83                                                      | 17.49                                                     | 68.2                           | 0.0           | 21.3                 | 2.9                | 4.8               | 2.7                 |
| 04030201 | Upper Fox             | Lake Michigan    | 122,967                    | 42,516                                  | 215,393                                 | 28.39                                        | 9.82                                                      | 49.74                                                     | 10.0                           | 15.5          | 11.6                 | 23.8               | 33.2              | 5.8                 |
| 04030202 | Wolf                  | Lake Michigan    | 239,207                    | 112,646                                 | 476,824                                 | 24.88                                        | 11.72                                                     | 49.59                                                     | 18.4                           | 7.1           | 10.2                 | 16.7               | 41.3              | 6.4                 |
| 04030203 | Lake Winnebago        | Lake Michigan    | 57,378                     | 17,766                                  | 107,721                                 | 43.06                                        | 13.33                                                     | 80.83                                                     | 4.7                            | 9.6           | 5.5                  | 19.2               | 53.4              | 7.7                 |
| 04030204 | Lower Fox             | Lake Michigan    | 221,418                    | 79,835                                  | 440,280                                 | 187.53                                       | 67.62                                                     | 372.90                                                    | 1.2                            | 44.5          | 8.2                  | 8.3                | 32.9              | 5.0                 |
| 04040001 | Little Calumet-Galien | Lake Michigan    | 130,350                    | 51,635                                  | 295,437                                 | 71.14                                        | 28.18                                                     | 161.23                                                    | 5.1                            | 55.5          | 22.5                 | 12.5               | 3.4               | 1.0                 |
| 04040002 | Pike-Root             | Lake Michigan    | 260,895                    | 95,797                                  | 528,655                                 | 247.56                                       | 90.90                                                     | 501.63                                                    | 1.3                            | 79.4          | 10.7                 | 4.7                | 3.4               | 0.6                 |
| 04040003 | Milwaukee             | Lake Michigan    | 187,023                    | 70,288                                  | 292,976                                 | 82.76                                        | 31.10                                                     | 129.65                                                    | 3.7                            | 48.4          | 19.2                 | 7.2                | 18.8              | 2.7                 |
| 04050001 | St. Joseph            | Lake Michigan    | 535,271                    | 209,721                                 | 1,118,905                               | 43.54                                        | 17.06                                                     | 91.00                                                     | 4.5                            | 23.8          | 18.5                 | 22.8               | 26.1              | 4.2                 |
| 04050002 | Black-Macatawa        | Lake Michigan    | 79,306                     | 31,079                                  | 141,461                                 | 53.87                                        | 21.11                                                     | 96.09                                                     | 4.6                            | 21.7          | 19.4                 | 11.0               | 41.3              | 1.9                 |
| 04050003 | Kalamazoo             | Lake Michigan    | 276,671                    | 130,342                                 | 620,411                                 | 52.71                                        | 24.83                                                     | 118.20                                                    | 5.0                            | 37.8          | 14.8                 | 12.4               | 27.5              | 2.4                 |

|          |                       |               |         |         |           |        |        |        |      |      |      |      |      |     |
|----------|-----------------------|---------------|---------|---------|-----------|--------|--------|--------|------|------|------|------|------|-----|
| 04050004 | Upper Grand           | Lake Michigan | 199,930 | 76,842  | 373,628   | 44.03  | 16.92  | 82.29  | 7.9  | 30.1 | 19.3 | 21.3 | 17.4 | 3.9 |
| 04050005 | Maple                 | Lake Michigan | 92,858  | 37,737  | 188,464   | 37.68  | 15.31  | 76.48  | 5.2  | 7.4  | 9.8  | 37.3 | 35.5 | 4.9 |
| 04050006 | Lower Grand           | Lake Michigan | 290,578 | 113,175 | 596,004   | 58.44  | 22.76  | 119.87 | 4.9  | 32.1 | 18.8 | 14.3 | 27.6 | 2.3 |
| 04050007 | Thornapple            | Lake Michigan | 84,944  | 26,929  | 178,079   | 38.12  | 12.08  | 79.91  | 10.3 | 5.1  | 14.4 | 32.9 | 31.6 | 5.8 |
| 04060101 | Pere Marquette-White  | Lake Michigan | 115,201 | 44,975  | 245,709   | 20.60  | 8.04   | 43.94  | 19.1 | 38.5 | 21.5 | 9.6  | 9.4  | 1.8 |
| 04060102 | Muskegon              | Lake Michigan | 105,162 | 37,402  | 198,052   | 14.92  | 5.31   | 28.10  | 23.1 | 13.1 | 29.9 | 9.2  | 20.0 | 4.7 |
| 04060103 | Manistee              | Lake Michigan | 84,277  | 29,590  | 166,036   | 16.70  | 5.86   | 32.91  | 25.4 | 47.4 | 20.4 | 2.2  | 2.8  | 1.8 |
| 04060104 | Betsie-Platte         | Lake Michigan | 27,005  | 10,545  | 66,615    | 13.08  | 5.11   | 32.27  | 26.9 | 31.1 | 30.0 | 6.5  | 3.7  | 1.8 |
| 04060105 | Boardman-Charlevoix   | Lake Michigan | 54,541  | 21,254  | 85,547    | 12.44  | 4.85   | 19.51  | 28.4 | 21.5 | 35.5 | 6.1  | 5.6  | 2.8 |
| 04060106 | Manistique            | Lake Michigan | 31,346  | 14,407  | 57,725    | 8.30   | 3.81   | 15.28  | 62.0 | 19.9 | 16.3 | 0.5  | 0.6  | 0.7 |
| 04060107 | Brevoort-Millecoquins | Lake Michigan | 12,585  | 4,837   | 22,004    | 8.20   | 3.15   | 14.34  | 68.6 | 1.2  | 25.2 | 0.5  | 3.1  | 1.4 |
| 04070001 | St. Marys             | Lake Huron    | 22,579  | 8,143   | 44,351    | 17.96  | 6.48   | 35.28  | 41.1 | 27.1 | 18.2 | 1.0  | 7.9  | 4.7 |
| 04070002 | Carp-Pine             | Lake Huron    | 25,230  | 9,650   | 52,082    | 14.91  | 5.70   | 30.78  | 48.2 | 33.5 | 14.9 | 0.2  | 1.6  | 1.6 |
| 04070003 | Lone Lake-Ocqueoc     | Lake Huron    | 67,125  | 26,658  | 134,252   | 32.86  | 13.05  | 65.73  | 19.7 | 62.2 | 11.6 | 2.5  | 2.6  | 1.5 |
| 04070004 | Cheboygan             | Lake Huron    | 11,788  | 4,048   | 20,630    | 5.04   | 1.73   | 8.83   | 43.2 | 8.6  | 36.5 | 2.6  | 5.7  | 3.4 |
| 04070005 | Black                 | Lake Huron    | 7,616   | 3,073   | 15,409    | 4.88   | 1.97   | 9.86   | 56.9 | 0.0  | 32.0 | 3.2  | 4.4  | 3.5 |
| 04070006 | Thunder Bay           | Lake Huron    | 45,048  | 15,831  | 76,992    | 13.63  | 4.79   | 23.29  | 36.7 | 21.6 | 22.5 | 5.4  | 9.4  | 4.4 |
| 04070007 | Au Sable              | Lake Huron    | 48,942  | 16,149  | 81,816    | 9.30   | 3.07   | 15.54  | 45.0 | 1.9  | 47.5 | 1.0  | 2.6  | 2.1 |
| 04080101 | Au Gres-Rifle         | Lake Huron    | 48,790  | 17,242  | 93,393    | 18.26  | 6.45   | 34.96  | 26.7 | 15.0 | 25.8 | 10.2 | 17.5 | 4.9 |
| 04080102 | Kawkawlin-Pine        | Lake Huron    | 18,906  | 6,779   | 35,940    | 14.90  | 5.34   | 28.32  | 11.5 | 4.1  | 41.1 | 35.7 | 6.0  | 1.7 |
| 04080103 | Pigeon-Wiscoggin      | Lake Huron    | 109,787 | 43,399  | 195,415   | 50.58  | 19.99  | 90.03  | 1.8  | 27.9 | 8.1  | 31.3 | 28.5 | 2.4 |
| 04080104 | Birch-Willow          | Lake Huron    | 75,269  | 28,497  | 165,545   | 51.63  | 19.55  | 113.55 | 4.0  | 14.8 | 8.1  | 34.9 | 34.7 | 3.5 |
| 04080201 | Tittabawassee         | Lake Huron    | 75,020  | 29,882  | 151,020   | 20.34  | 8.10   | 40.95  | 15.9 | 35.8 | 25.8 | 9.6  | 9.3  | 3.6 |
| 04080202 | Pine                  | Lake Huron    | 56,428  | 21,485  | 124,539   | 20.43  | 7.78   | 45.10  | 11.7 | 19.5 | 22.0 | 21.9 | 20.6 | 4.4 |
| 04080203 | Shiawassee            | Lake Huron    | 68,392  | 28,105  | 125,100   | 23.78  | 9.77   | 43.49  | 9.9  | 15.0 | 24.6 | 33.4 | 13.8 | 3.3 |
| 04080204 | Flint                 | Lake Huron    | 163,686 | 62,623  | 293,494   | 42.36  | 16.21  | 75.95  | 8.0  | 41.4 | 25.5 | 15.7 | 7.2  | 2.1 |
| 04080205 | Cass                  | Lake Huron    | 59,887  | 22,472  | 110,373   | 24.95  | 9.36   | 45.97  | 8.8  | 10.6 | 17.8 | 37.3 | 21.6 | 3.9 |
| 04080206 | Saginaw               | Lake Huron    | 135,956 | 47,928  | 294,628   | 203.99 | 71.91  | 442.07 | 0.2  | 83.7 | 8.5  | 6.2  | 1.2  | 0.2 |
| 04090001 | St. Clair             | Lake Erie     | 139,583 | 51,498  | 231,744   | 41.78  | 15.42  | 69.37  | 8.9  | 30.3 | 12.6 | 27.6 | 16.5 | 4.1 |
| 04090002 | Lake St. Clair        | Lake Erie     | 14,502  | 5,942   | 25,212    | 29.14  | 11.94  | 50.67  | 2.9  | 41.9 | 54.0 | 0.7  | 0.3  | 0.2 |
| 04090003 | Clinton               | Lake Erie     | 177,188 | 74,267  | 283,622   | 68.95  | 28.90  | 110.37 | 3.6  | 49.5 | 39.2 | 5.3  | 1.8  | 0.6 |
| 04090004 | Detroit               | Lake Erie     | 947,079 | 370,718 | 1,879,417 | 377.96 | 147.95 | 750.04 | 0.2  | 91.6 | 8.0  | 0.2  | 0.1  | 0.0 |
| 04090005 | Huron                 | Lake Erie     | 97,108  | 34,313  | 190,794   | 40.63  | 14.36  | 79.83  | 6.8  | 37.6 | 42.5 | 7.9  | 4.2  | 1.0 |
| 04100001 | Ottawa-Stony          | Lake Erie     | 60,276  | 21,157  | 98,002    | 35.98  | 12.63  | 58.49  | 3.0  | 22.9 | 40.9 | 25.7 | 6.6  | 0.9 |
| 04100002 | Raisin                | Lake Erie     | 116,104 | 47,718  | 248,181   | 40.84  | 16.78  | 87.29  | 4.4  | 33.5 | 15.7 | 29.2 | 14.8 | 2.5 |
| 04100003 | St. Joseph            | Lake Erie     | 138,424 | 53,932  | 288,736   | 49.26  | 19.19  | 102.74 | 5.4  | 14.9 | 11.1 | 41.5 | 22.5 | 4.7 |
| 04100004 | St. Marys             | Lake Erie     | 278,488 | 96,661  | 520,651   | 135.25 | 46.95  | 252.86 | 0.7  | 8.1  | 5.9  | 24.8 | 57.8 | 2.7 |
| 04100005 | Upper Maumee          | Lake Erie     | 97,959  | 30,702  | 238,873   | 109.90 | 34.44  | 267.98 | 0.9  | 57.7 | 7.9  | 23.1 | 8.8  | 1.5 |
| 04100006 | Tiffin                | Lake Erie     | 83,910  | 30,815  | 178,536   | 40.67  | 14.94  | 86.54  | 4.2  | 9.9  | 10.7 | 47.4 | 24.8 | 3.1 |
| 04100007 | Auglaize              | Lake Erie     | 309,622 | 126,052 | 499,052   | 69.17  | 28.16  | 111.48 | 1.1  | 19.6 | 8.1  | 47.2 | 22.6 | 1.5 |
| 04100008 | Blanchard             | Lake Erie     | 114,672 | 48,075  | 210,781   | 59.76  | 25.05  | 109.85 | 1.3  | 16.5 | 10.2 | 49.9 | 20.8 | 1.2 |
| 04100009 | Lower Maumee          | Lake Erie     | 269,222 | 99,686  | 579,134   | 98.66  | 36.53  | 212.24 | 0.6  | 62.2 | 9.3  | 22.4 | 5.2  | 0.4 |
| 04100010 | Cedar-Portage         | Lake Erie     | 139,994 | 52,185  | 264,804   | 56.06  | 20.90  | 106.04 | 2.1  | 21.5 | 12.7 | 56.4 | 6.7  | 0.6 |
| 04100011 | Sandusky              | Lake Erie     | 317,763 | 125,188 | 655,727   | 66.29  | 26.12  | 136.80 | 2.2  | 15.8 | 9.0  | 52.6 | 18.4 | 2.0 |
| 04100012 | Huron-Vermilion       | Lake Erie     | 184,967 | 59,161  | 392,747   | 93.74  | 29.98  | 199.05 | 5.9  | 10.9 | 5.6  | 56.7 | 17.7 | 3.1 |
| 04110001 | Black-Rocky           | Lake Erie     | 232,917 | 80,190  | 402,141   | 99.30  | 34.19  | 171.45 | 6.7  | 46.7 | 17.8 | 17.4 | 9.3  | 2.0 |
| 04110002 | Cuyahoga              | Lake Erie     | 324,274 | 123,867 | 742,931   | 155.10 | 59.24  | 355.33 | 4.3  | 73.4 | 16.6 | 3.1  | 1.8  | 0.8 |
| 04110003 | Ashtabula-Chagrin     | Lake Erie     | 210,631 | 79,878  | 374,752   | 130.70 | 49.56  | 232.53 | 6.3  | 64.8 | 18.7 | 5.6  | 3.4  | 1.1 |
| 04110004 | Grand                 | Lake Erie     | 104,162 | 36,701  | 167,823   | 56.64  | 19.96  | 91.26  | 24.9 | 4.5  | 11.1 | 31.9 | 21.0 | 6.6 |
| 04120101 | Chautauqua-Conneaut   | Lake Erie     | 167,609 | 63,963  | 321,052   | 74.76  | 28.53  | 143.20 | 11.4 | 52.9 | 11.5 | 7.9  | 13.0 | 3.3 |
| 04120102 | Cattaraugus           | Lake Erie     | 52,305  | 17,748  | 95,344    | 36.09  | 12.25  | 65.78  | 26.1 | 6.7  | 7.5  | 14.9 | 37.4 | 7.3 |
| 04120103 | Buffalo-Eighteenmile  | Lake Erie     | 146,941 | 55,394  | 285,859   | 78.91  | 29.75  | 153.50 | 12.3 | 40.5 | 13.3 | 9.5  | 21.2 | 3.2 |
| 04120104 | Niagara               | Lake Ontario  | 518,390 | 190,483 | 1,107,598 | 205.27 | 75.43  | 438.59 | 3.1  | 78.4 | 5.5  | 4.5  | 7.2  | 1.3 |

|          |                                |              |         |         |           |        |       |        |      |      |      |      |      |      |
|----------|--------------------------------|--------------|---------|---------|-----------|--------|-------|--------|------|------|------|------|------|------|
| 04130001 | Oak Orchard-Twelvemile         | Lake Ontario | 158,734 | 75,045  | 318,243   | 47.61  | 22.51 | 95.46  | 8.5  | 45.0 | 7.2  | 22.4 | 13.4 | 3.5  |
| 04130002 | Upper Genesee                  | Lake Ontario | 152,743 | 52,958  | 281,132   | 41.58  | 14.41 | 76.52  | 26.2 | 9.1  | 5.4  | 14.6 | 36.6 | 8.2  |
| 04130003 | Lower Genesee                  | Lake Ontario | 201,650 | 68,694  | 341,134   | 73.13  | 24.91 | 123.71 | 8.3  | 21.2 | 8.6  | 22.5 | 33.0 | 6.4  |
| 04140101 | Irondequoit-Ninemile           | Lake Ontario | 206,172 | 85,160  | 437,939   | 112.96 | 46.66 | 239.95 | 6.4  | 70.3 | 7.5  | 7.1  | 7.5  | 1.2  |
| 04140102 | Salmon-Sandy                   | Lake Ontario | 75,141  | 23,119  | 147,503   | 30.28  | 9.32  | 59.43  | 39.0 | 24.3 | 6.0  | 6.2  | 20.2 | 4.4  |
| 04140201 | Seneca                         | Lake Ontario | 436,812 | 148,071 | 802,922   | 48.98  | 16.60 | 90.04  | 9.9  | 32.0 | 8.1  | 17.8 | 27.3 | 4.9  |
| 04140202 | Oneida                         | Lake Ontario | 95,050  | 34,525  | 150,921   | 24.45  | 8.88  | 38.82  | 27.3 | 16.0 | 11.5 | 11.7 | 28.4 | 5.0  |
| 04140203 | Oswego                         | Lake Ontario | 13,081  | 5,172   | 24,765    | 34.70  | 13.72 | 65.69  | 26.6 | 27.3 | 15.1 | 10.2 | 16.9 | 3.8  |
| 04150101 | Black                          | Lake Ontario | 144,610 | 50,020  | 273,349   | 29.16  | 10.09 | 55.13  | 31.2 | 31.2 | 3.6  | 5.8  | 24.3 | 4.0  |
| 04150102 | Chaumont-Perch                 | Lake Ontario | 56,686  | 17,954  | 92,314    | 61.84  | 19.58 | 100.70 | 18.6 | 5.0  | 4.8  | 11.0 | 50.8 | 9.7  |
| 04150301 | Upper St. Lawrence             | Lake Ontario | 55,458  | 20,789  | 86,452    | 23.47  | 8.80  | 36.59  | 22.2 | 12.0 | 6.6  | 9.5  | 41.1 | 8.6  |
| 04150302 | Oswegatchie                    | St.Lawrence  | 54,482  | 19,691  | 97,588    | 20.84  | 7.53  | 37.33  | 42.8 | 8.1  | 5.2  | 7.2  | 30.5 | 6.2  |
| 04150303 | Indian                         | St.Lawrence  | 28,223  | 10,813  | 54,279    | 19.56  | 7.50  | 37.63  | 39.0 | 3.0  | 9.8  | 7.6  | 33.4 | 7.2  |
| 04150304 | Grass                          | St.Lawrence  | 42,991  | 15,460  | 80,921    | 23.75  | 8.54  | 44.71  | 42.2 | 12.4 | 6.4  | 6.5  | 27.1 | 5.4  |
| 04150305 | Raquette                       | St.Lawrence  | 44,089  | 17,933  | 86,221    | 13.65  | 5.55  | 26.70  | 67.2 | 10.6 | 7.2  | 2.5  | 10.3 | 2.3  |
| 04150306 | St. Regis                      | St.Lawrence  | 31,078  | 12,333  | 60,588    | 13.94  | 5.53  | 27.17  | 60.8 | 12.5 | 5.4  | 3.6  | 14.7 | 3.0  |
| 04150307 | English-Salmon                 | St.Lawrence  | 35,042  | 11,419  | 77,310    | 20.81  | 6.78  | 45.91  | 41.1 | 5.6  | 7.6  | 8.3  | 31.8 | 5.7  |
| 05010001 | Upper Allegheny                | Ohio River   | 164,803 | 51,360  | 279,885   | 24.73  | 7.71  | 42.01  | 51.9 | 18.3 | 7.8  | 4.8  | 13.3 | 3.9  |
| 05010002 | Conewango                      | Ohio River   | 84,627  | 32,875  | 159,920   | 35.74  | 13.88 | 67.54  | 28.8 | 12.1 | 8.8  | 12.0 | 31.0 | 7.3  |
| 05010003 | Middle Allegheny-Tionesta      | Ohio River   | 90,476  | 41,841  | 164,105   | 20.74  | 9.59  | 37.61  | 53.9 | 10.1 | 12.1 | 6.0  | 12.9 | 5.1  |
| 05010004 | French                         | Ohio River   | 108,316 | 37,847  | 197,640   | 34.03  | 11.89 | 62.09  | 28.9 | 7.4  | 12.7 | 15.5 | 27.7 | 7.8  |
| 05010005 | Clarion                        | Ohio River   | 74,447  | 38,088  | 139,626   | 23.06  | 11.80 | 43.24  | 43.2 | 29.7 | 12.0 | 4.1  | 7.0  | 4.0  |
| 05010006 | Middle Allegheny-Redbank       | Ohio River   | 121,427 | 50,700  | 249,909   | 27.88  | 11.64 | 57.38  | 37.4 | 11.1 | 17.7 | 11.8 | 14.2 | 7.7  |
| 05010007 | Conemaugh                      | Ohio River   | 116,111 | 43,266  | 204,941   | 32.68  | 12.18 | 57.68  | 28.1 | 16.3 | 17.0 | 13.0 | 18.6 | 7.0  |
| 05010008 | Kiskiminetas                   | Ohio River   | 48,600  | 23,153  | 84,762    | 36.41  | 17.35 | 63.51  | 32.5 | 17.9 | 18.9 | 8.3  | 14.8 | 7.5  |
| 05010009 | Lower Allegheny                | Ohio River   | 75,970  | 28,928  | 131,835   | 58.99  | 22.46 | 102.37 | 17.1 | 38.3 | 30.5 | 4.6  | 5.6  | 3.8  |
| 05020001 | Tygart Valley                  | Ohio River   | 93,152  | 37,277  | 171,767   | 26.22  | 10.49 | 48.34  | 50.1 | 10.3 | 14.7 | 4.2  | 2.1  | 18.6 |
| 05020002 | West Fork                      | Ohio River   | 84,050  | 35,098  | 162,494   | 36.65  | 15.30 | 70.85  | 45.3 | 16.8 | 14.4 | 2.9  | 1.0  | 19.6 |
| 05020003 | Upper Monongahela              | Ohio River   | 57,102  | 18,391  | 105,524   | 47.85  | 15.41 | 88.42  | 30.3 | 43.2 | 14.7 | 1.2  | 1.4  | 9.1  |
| 05020004 | Cheat                          | Ohio River   | 68,298  | 26,752  | 130,147   | 18.37  | 7.20  | 35.00  | 60.7 | 5.5  | 15.9 | 2.9  | 3.3  | 11.7 |
| 05020005 | Lower Monongahela              | Ohio River   | 185,751 | 84,075  | 323,192   | 48.70  | 22.04 | 84.74  | 23.6 | 30.2 | 22.7 | 3.9  | 7.7  | 11.9 |
| 05020006 | Youghiogheny                   | Ohio River   | 149,306 | 68,250  | 283,853   | 32.94  | 15.06 | 62.63  | 26.9 | 13.3 | 17.4 | 10.6 | 21.5 | 10.4 |
| 05030101 | Upper Ohio                     | Ohio River   | 486,333 | 179,422 | 903,346   | 93.96  | 34.66 | 174.52 | 11.2 | 60.6 | 12.4 | 4.5  | 7.0  | 4.2  |
| 05030102 | Shenango                       | Ohio River   | 118,416 | 42,912  | 216,784   | 42.89  | 15.54 | 78.52  | 16.3 | 17.8 | 16.0 | 16.1 | 24.2 | 9.6  |
| 05030103 | Mahoning                       | Ohio River   | 242,963 | 77,032  | 457,656   | 83.56  | 26.49 | 157.40 | 8.5  | 50.6 | 15.5 | 12.5 | 10.1 | 2.9  |
| 05030104 | Beaver                         | Ohio River   | 19,276  | 7,050   | 34,199    | 61.47  | 22.48 | 109.06 | 18.3 | 33.5 | 25.4 | 5.4  | 12.0 | 5.5  |
| 05030105 | Connoquenessing                | Ohio River   | 216,438 | 82,094  | 439,629   | 99.80  | 37.85 | 202.71 | 8.5  | 68.9 | 9.0  | 4.2  | 6.2  | 3.3  |
| 05030106 | Upper Ohio-Wheeling            | Ohio River   | 166,454 | 63,214  | 319,622   | 42.41  | 16.11 | 81.44  | 33.2 | 22.3 | 12.5 | 4.9  | 10.0 | 17.1 |
| 05030201 | Little Muskingum-Middle Island | Ohio River   | 214,533 | 88,514  | 388,710   | 45.93  | 18.95 | 83.23  | 46.6 | 24.2 | 8.5  | 4.1  | 5.2  | 11.4 |
| 05030202 | Upper Ohio-Shade               | Ohio River   | 183,273 | 74,682  | 316,079   | 50.74  | 20.67 | 87.50  | 39.3 | 17.4 | 9.7  | 9.3  | 6.5  | 17.8 |
| 05030203 | Little Kanawha                 | Ohio River   | 216,832 | 79,155  | 456,483   | 36.30  | 13.25 | 76.42  | 68.7 | 1.7  | 8.8  | 3.0  | 0.6  | 17.2 |
| 05030204 | Hocking                        | Ohio River   | 120,410 | 47,007  | 222,553   | 38.67  | 15.10 | 71.48  | 32.7 | 19.1 | 12.5 | 17.6 | 8.6  | 9.6  |
| 05040001 | Tuscarawas                     | Ohio River   | 611,862 | 216,179 | 1,097,263 | 91.00  | 32.15 | 163.20 | 7.6  | 38.4 | 9.9  | 12.2 | 25.8 | 6.1  |
| 05040002 | Mohican                        | Ohio River   | 208,312 | 78,361  | 372,511   | 80.82  | 30.40 | 144.53 | 8.5  | 17.6 | 7.8  | 26.8 | 32.3 | 7.0  |
| 05040003 | Walhonding                     | Ohio River   | 287,930 | 111,205 | 488,861   | 89.60  | 34.61 | 152.13 | 8.1  | 12.1 | 5.9  | 21.2 | 43.8 | 8.9  |
| 05040004 | Muskingum                      | Ohio River   | 220,568 | 82,123  | 396,626   | 54.03  | 20.12 | 97.16  | 27.3 | 8.9  | 8.6  | 20.2 | 18.6 | 16.4 |
| 05040005 | Wills                          | Ohio River   | 87,714  | 41,970  | 146,027   | 39.74  | 19.01 | 66.15  | 34.0 | 6.5  | 10.4 | 11.7 | 15.4 | 22.0 |
| 05040006 | Licking                        | Ohio River   | 128,868 | 43,943  | 224,878   | 63.81  | 21.76 | 111.36 | 10.6 | 13.5 | 9.4  | 31.0 | 31.0 | 4.5  |
| 05050001 | Upper New                      | Ohio River   | 287,506 | 105,661 | 536,811   | 37.61  | 13.82 | 70.22  | 21.0 | 7.3  | 10.5 | 18.2 | 13.2 | 29.8 |
| 05050002 | Middle New                     | Ohio River   | 109,822 | 41,972  | 205,902   | 26.11  | 9.98  | 48.96  | 39.6 | 6.7  | 14.9 | 8.9  | 6.1  | 23.8 |
| 05050003 | Greenbrier                     | Ohio River   | 100,896 | 36,350  | 159,826   | 23.44  | 8.44  | 37.12  | 45.2 | 4.0  | 11.7 | 6.5  | 11.0 | 21.6 |
| 05050004 | Lower New                      | Ohio River   | 42,439  | 13,035  | 89,582    | 23.58  | 7.24  | 49.77  | 38.9 | 30.4 | 24.0 | 2.2  | 0.2  | 4.3  |
| 05050005 | Gauley                         | Ohio River   | 60,182  | 23,873  | 115,309   | 16.18  | 6.42  | 30.99  | 69.1 | 5.2  | 15.3 | 1.9  | 2.2  | 6.3  |

|          |                                |            |         |         |           |        |       |        |      |      |      |      |      |      |
|----------|--------------------------------|------------|---------|---------|-----------|--------|-------|--------|------|------|------|------|------|------|
| 05050006 | Upper Kanawha                  | Ohio River | 44,992  | 18,957  | 88,988    | 33.43  | 14.09 | 66.13  | 26.7 | 58.5 | 13.2 | 0.2  | 0.0  | 1.3  |
| 05050007 | Elk                            | Ohio River | 80,341  | 34,736  | 137,423   | 20.32  | 8.79  | 34.77  | 74.4 | 4.1  | 14.7 | 0.9  | 0.1  | 5.9  |
| 05050008 | Lower Kanawha                  | Ohio River | 125,011 | 44,393  | 238,628   | 56.10  | 19.92 | 107.08 | 41.8 | 28.8 | 11.1 | 4.2  | 2.2  | 11.9 |
| 05050009 | Coal                           | Ohio River | 28,933  | 10,634  | 58,012    | 12.58  | 4.62  | 25.22  | 72.0 | 4.7  | 20.3 | 0.7  | 0.0  | 2.2  |
| 05060001 | Upper Scioto                   | Ohio River | 868,584 | 351,019 | 1,704,808 | 103.00 | 41.63 | 202.17 | 2.2  | 42.4 | 9.9  | 31.2 | 12.1 | 2.2  |
| 05060002 | Lower Scioto                   | Ohio River | 241,220 | 109,576 | 527,589   | 43.01  | 19.54 | 94.07  | 20.1 | 18.0 | 7.5  | 38.3 | 9.6  | 6.5  |
| 05060003 | Paint                          | Ohio River | 176,663 | 65,550  | 327,173   | 59.76  | 22.17 | 110.67 | 6.2  | 32.0 | 5.3  | 44.0 | 7.0  | 5.4  |
| 05070101 | Upper Guyandotte               | Ohio River | 33,995  | 15,186  | 65,174    | 14.01  | 6.26  | 26.85  | 67.4 | 8.7  | 22.9 | 0.3  | 0.0  | 0.8  |
| 05070102 | Lower Guyandotte               | Ohio River | 59,726  | 21,977  | 117,494   | 29.42  | 10.83 | 57.88  | 60.6 | 13.5 | 17.6 | 2.2  | 0.2  | 5.9  |
| 05070201 | Tug                            | Ohio River | 62,656  | 24,154  | 111,680   | 15.54  | 5.99  | 27.70  | 68.0 | 7.9  | 21.7 | 0.4  | 0.3  | 1.6  |
| 05070202 | Upper Levisa                   | Ohio River | 45,856  | 16,889  | 90,773    | 14.60  | 5.38  | 28.90  | 66.6 | 5.5  | 23.0 | 1.3  | 0.4  | 3.1  |
| 05070203 | Lower Levisa                   | Ohio River | 43,534  | 16,288  | 80,188    | 15.11  | 5.65  | 27.83  | 53.0 | 17.7 | 25.0 | 1.9  | 0.2  | 2.2  |
| 05070204 | Big Sandy                      | Ohio River | 31,670  | 12,720  | 59,912    | 29.73  | 11.94 | 56.24  | 54.9 | 16.7 | 13.7 | 4.3  | 1.5  | 8.7  |
| 05080001 | Upper Great Miami              | Ohio River | 526,515 | 193,600 | 970,639   | 82.55  | 30.35 | 152.19 | 1.1  | 27.8 | 7.9  | 25.3 | 35.9 | 2.0  |
| 05080002 | Lower Great Miami              | Ohio River | 572,881 | 235,803 | 1,142,796 | 161.17 | 66.34 | 321.51 | 2.3  | 60.4 | 8.2  | 16.1 | 10.7 | 2.3  |
| 05080003 | Whitewater                     | Ohio River | 257,584 | 87,769  | 513,779   | 67.11  | 22.87 | 133.86 | 10.0 | 10.9 | 6.4  | 38.1 | 26.5 | 8.1  |
| 05090101 | Raccoon-Symmes                 | Ohio River | 159,914 | 70,764  | 294,769   | 40.99  | 18.14 | 75.56  | 38.5 | 16.9 | 11.4 | 10.4 | 7.4  | 15.5 |
| 05090102 | Twelvepole                     | Ohio River | 24,671  | 9,501   | 42,802    | 21.76  | 8.38  | 37.76  | 74.3 | 1.8  | 16.2 | 1.4  | 0.4  | 5.9  |
| 05090103 | Little Scioto-Tygarts          | Ohio River | 123,355 | 50,414  | 261,934   | 47.39  | 19.37 | 100.62 | 27.1 | 29.8 | 13.4 | 12.9 | 6.9  | 9.9  |
| 05090104 | Little Sandy                   | Ohio River | 77,494  | 34,385  | 142,941   | 41.52  | 18.42 | 76.59  | 43.8 | 11.4 | 9.8  | 13.1 | 3.9  | 18.1 |
| 05090201 | Ohio Brush-Whiteoak            | Ohio River | 390,292 | 137,780 | 706,743   | 71.91  | 25.39 | 130.22 | 21.3 | 10.7 | 4.8  | 35.9 | 10.7 | 16.6 |
| 05090202 | Little Miami                   | Ohio River | 478,419 | 180,256 | 1,066,353 | 104.38 | 39.33 | 232.65 | 5.8  | 49.2 | 9.5  | 26.9 | 4.9  | 3.8  |
| 05090203 | Middle Ohio-Laughery           | Ohio River | 516,933 | 171,372 | 993,507   | 141.95 | 47.06 | 272.81 | 11.4 | 55.7 | 8.1  | 11.0 | 6.0  | 7.8  |
| 05100101 | Licking                        | Ohio River | 541,015 | 223,770 | 1,084,983 | 75.16  | 31.09 | 150.73 | 23.5 | 2.7  | 4.9  | 21.6 | 13.9 | 33.4 |
| 05100102 | South Fork Licking             | Ohio River | 298,331 | 103,901 | 623,969   | 123.98 | 43.18 | 259.31 | 7.3  | 8.2  | 3.4  | 25.0 | 12.7 | 43.4 |
| 05100201 | North Fork Kentucky            | Ohio River | 134,417 | 54,591  | 243,983   | 38.94  | 15.81 | 70.68  | 33.0 | 54.3 | 10.1 | 1.1  | 0.2  | 1.2  |
| 05100202 | Middle Fork Kentucky           | Ohio River | 25,499  | 10,628  | 52,497    | 17.55  | 7.31  | 36.13  | 78.5 | 1.9  | 16.6 | 1.7  | 0.3  | 1.0  |
| 05100203 | South Fork Kentucky            | Ohio River | 40,955  | 16,550  | 67,261    | 21.14  | 8.54  | 34.72  | 65.7 | 4.5  | 16.4 | 6.6  | 1.1  | 5.7  |
| 05100204 | Upper Kentucky                 | Ohio River | 115,431 | 42,158  | 225,544   | 41.11  | 15.01 | 80.33  | 38.4 | 3.0  | 9.3  | 16.8 | 5.7  | 26.8 |
| 05100205 | Lower Kentucky                 | Ohio River | 985,263 | 357,124 | 2,335,273 | 117.70 | 42.66 | 278.98 | 11.8 | 21.5 | 4.6  | 20.6 | 9.9  | 31.7 |
| 05110001 | Upper Green                    | Ohio River | 646,809 | 295,571 | 1,194,380 | 79.59  | 36.37 | 146.96 | 13.2 | 4.4  | 3.7  | 30.0 | 17.9 | 30.8 |
| 05110002 | Barren                         | Ohio River | 601,082 | 194,467 | 1,058,845 | 102.75 | 33.24 | 181.00 | 8.1  | 5.5  | 4.1  | 29.6 | 19.1 | 33.6 |
| 05110003 | Middle Green                   | Ohio River | 171,909 | 62,899  | 321,788   | 64.72  | 23.68 | 121.15 | 18.5 | 8.2  | 4.4  | 27.8 | 27.3 | 13.8 |
| 05110004 | Rough                          | Ohio River | 196,282 | 71,323  | 341,945   | 69.79  | 25.36 | 121.59 | 17.3 | 1.8  | 3.3  | 27.5 | 26.7 | 23.4 |
| 05110005 | Lower Green                    | Ohio River | 284,153 | 101,167 | 558,770   | 121.36 | 43.21 | 238.64 | 7.0  | 2.4  | 3.2  | 42.4 | 31.3 | 13.7 |
| 05110006 | Pond                           | Ohio River | 180,314 | 74,715  | 451,698   | 87.91  | 36.43 | 220.22 | 16.4 | 2.3  | 3.1  | 31.9 | 36.3 | 10.0 |
| 05120101 | Upper Wabash                   | Ohio River | 417,608 | 143,698 | 737,729   | 99.20  | 34.14 | 175.25 | 1.3  | 7.0  | 5.7  | 31.4 | 51.9 | 2.8  |
| 05120102 | Salamonie                      | Ohio River | 125,106 | 50,307  | 270,245   | 87.80  | 35.30 | 189.65 | 1.9  | 2.2  | 4.2  | 36.0 | 52.9 | 2.9  |
| 05120103 | Mississinewa                   | Ohio River | 159,158 | 62,833  | 330,499   | 76.87  | 30.35 | 159.62 | 1.9  | 12.3 | 7.0  | 37.6 | 38.6 | 2.6  |
| 05120104 | Eel                            | Ohio River | 134,907 | 51,972  | 206,239   | 64.08  | 24.68 | 97.96  | 2.1  | 17.9 | 7.2  | 35.3 | 33.5 | 4.0  |
| 05120105 | Middle Wabash-Deer             | Ohio River | 128,269 | 51,446  | 274,494   | 74.69  | 29.95 | 159.83 | 1.2  | 2.7  | 5.2  | 35.3 | 52.1 | 3.5  |
| 05120106 | Tippecanoe                     | Ohio River | 190,403 | 71,915  | 413,057   | 36.94  | 13.95 | 80.14  | 2.1  | 15.3 | 10.8 | 39.9 | 29.4 | 2.5  |
| 05120107 | Wildcat                        | Ohio River | 207,617 | 68,785  | 381,628   | 95.67  | 31.70 | 175.85 | 1.0  | 11.4 | 6.5  | 34.8 | 44.7 | 1.7  |
| 05120108 | Middle Wabash-Little Vermilion | Ohio River | 372,225 | 139,954 | 655,187   | 63.59  | 23.91 | 111.93 | 3.9  | 29.9 | 6.7  | 43.5 | 13.0 | 2.9  |
| 05120109 | Vermilion                      | Ohio River | 297,145 | 117,257 | 657,843   | 80.48  | 31.76 | 178.17 | 1.8  | 12.4 | 7.2  | 69.9 | 6.8  | 1.9  |
| 05120110 | Sugar                          | Ohio River | 148,382 | 56,771  | 312,029   | 72.70  | 27.82 | 152.88 | 2.9  | 4.6  | 6.2  | 46.1 | 36.8 | 3.4  |
| 05120111 | Middle Wabash-Busseron         | Ohio River | 348,563 | 111,188 | 599,981   | 66.57  | 21.24 | 114.59 | 7.0  | 15.5 | 7.6  | 55.1 | 12.7 | 2.1  |
| 05120112 | Embarras                       | Ohio River | 676,081 | 212,096 | 1,405,133 | 105.94 | 33.24 | 220.19 | 4.0  | 2.5  | 4.4  | 59.7 | 26.7 | 2.7  |
| 05120113 | Lower Wabash                   | Ohio River | 295,531 | 102,123 | 588,331   | 83.71  | 28.93 | 166.64 | 4.5  | 2.5  | 5.2  | 65.4 | 19.5 | 3.0  |
| 05120114 | Little Wabash                  | Ohio River | 818,755 | 295,718 | 1,560,285 | 148.44 | 53.61 | 282.88 | 4.5  | 2.0  | 3.3  | 53.0 | 30.8 | 6.6  |
| 05120115 | Skillet                        | Ohio River | 269,104 | 114,284 | 544,266   | 97.25  | 41.30 | 196.70 | 6.8  | 0.5  | 3.9  | 63.1 | 17.9 | 7.8  |
| 05120201 | Upper White                    | Ohio River | 801,844 | 336,639 | 1,748,726 | 113.09 | 47.48 | 246.64 | 2.2  | 57.3 | 12.0 | 19.8 | 6.8  | 1.9  |
| 05120202 | Lower White                    | Ohio River | 297,078 | 108,736 | 619,593   | 70.93  | 25.96 | 147.94 | 11.0 | 9.3  | 4.6  | 33.2 | 37.1 | 4.9  |

|          |                                   |               |           |         |           |        |        |        |      |      |      |      |      |      |
|----------|-----------------------------------|---------------|-----------|---------|-----------|--------|--------|--------|------|------|------|------|------|------|
| 05120203 | Eel                               | Ohio River    | 190,468   | 76,353  | 335,184   | 60.92  | 24.42  | 107.20 | 10.3 | 5.4  | 5.5  | 50.6 | 21.2 | 6.9  |
| 05120204 | Driftwood                         | Ohio River    | 197,930   | 79,257  | 400,375   | 65.07  | 26.06  | 131.62 | 3.3  | 19.1 | 10.2 | 40.3 | 21.7 | 5.3  |
| 05120205 | Flatrock-Haw                      | Ohio River    | 83,242    | 29,370  | 167,568   | 60.96  | 21.51  | 122.71 | 1.7  | 4.0  | 7.3  | 48.1 | 33.9 | 5.0  |
| 05120206 | Upper East Fork White             | Ohio River    | 207,178   | 83,793  | 328,062   | 91.46  | 36.99  | 144.82 | 4.8  | 10.9 | 5.1  | 37.6 | 37.1 | 4.6  |
| 05120207 | Muscatatuck                       | Ohio River    | 227,511   | 96,937  | 411,865   | 76.90  | 32.76  | 139.21 | 17.2 | 4.5  | 4.1  | 43.8 | 22.7 | 7.7  |
| 05120208 | Lower East Fork White             | Ohio River    | 306,634   | 117,218 | 545,420   | 58.11  | 22.21  | 103.36 | 18.9 | 8.3  | 5.2  | 22.2 | 35.8 | 9.6  |
| 05120209 | Patoka                            | Ohio River    | 218,768   | 87,252  | 403,161   | 97.79  | 39.00  | 180.21 | 8.1  | 7.9  | 3.3  | 22.9 | 55.1 | 2.8  |
| 05130101 | Upper Cumberland                  | Cumberland    | 163,702   | 65,929  | 283,418   | 27.12  | 10.92  | 46.96  | 39.7 | 25.3 | 16.0 | 6.6  | 2.2  | 10.2 |
| 05130102 | Rockcastle                        | Cumberland    | 68,115    | 24,124  | 110,762   | 34.45  | 12.20  | 56.02  | 37.5 | 1.7  | 12.0 | 15.8 | 7.6  | 25.4 |
| 05130103 | Upper Cumberland-Lake Cumberland  | Cumberland    | 271,347   | 89,943  | 552,657   | 55.72  | 18.47  | 113.48 | 19.7 | 2.3  | 5.5  | 25.7 | 16.4 | 30.4 |
| 05130104 | South Fork Cumberland             | Cumberland    | 81,548    | 30,410  | 179,990   | 22.74  | 8.48   | 50.19  | 47.1 | 2.7  | 14.5 | 6.9  | 15.7 | 13.1 |
| 05130105 | Obey                              | Cumberland    | 99,087    | 35,849  | 172,433   | 40.37  | 14.61  | 70.26  | 20.9 | 15.6 | 6.1  | 11.8 | 16.1 | 29.5 |
| 05130106 | Upper Cumberland-Cordell Hull     | Cumberland    | 86,665    | 32,548  | 161,319   | 41.91  | 15.74  | 78.01  | 28.4 | 2.8  | 9.8  | 15.3 | 9.6  | 34.0 |
| 05130107 | Collins                           | Cumberland    | 148,074   | 56,506  | 277,200   | 72.28  | 27.58  | 135.32 | 11.9 | 2.4  | 4.7  | 29.4 | 21.8 | 29.8 |
| 05130108 | Caney                             | Cumberland    | 212,911   | 74,834  | 439,634   | 45.96  | 16.15  | 94.90  | 20.8 | 7.6  | 8.3  | 19.7 | 12.1 | 31.5 |
| 05130201 | Lower Cumberland-Old Hickory Lake | Cumberland    | 184,414   | 75,363  | 346,550   | 71.98  | 29.41  | 135.26 | 17.6 | 6.3  | 7.1  | 17.1 | 11.9 | 40.0 |
| 05130202 | Lower Cumberland-Sycamore         | Cumberland    | 340,172   | 135,295 | 627,960   | 202.29 | 80.46  | 373.43 | 5.0  | 81.4 | 7.9  | 2.0  | 0.8  | 2.9  |
| 05130203 | Stones                            | Cumberland    | 335,841   | 132,419 | 591,354   | 140.15 | 55.26  | 246.78 | 7.7  | 64.2 | 5.4  | 5.3  | 4.9  | 12.6 |
| 05130204 | Harpeth                           | Cumberland    | 125,145   | 45,315  | 214,386   | 55.78  | 20.20  | 95.55  | 20.5 | 22.3 | 10.2 | 12.1 | 8.7  | 26.0 |
| 05130205 | Lower Cumberland                  | Cumberland    | 342,936   | 131,316 | 755,232   | 56.55  | 21.65  | 124.53 | 20.6 | 7.2  | 4.5  | 36.2 | 10.9 | 20.5 |
| 05130206 | Red                               | Cumberland    | 404,980   | 159,165 | 744,544   | 107.61 | 42.29  | 197.84 | 6.2  | 8.4  | 4.8  | 45.7 | 15.9 | 19.0 |
| 05140101 | Silver-Little Kentucky            | Ohio River    | 420,991   | 171,372 | 845,181   | 128.27 | 52.21  | 257.51 | 11.5 | 54.9 | 7.7  | 12.2 | 4.3  | 9.4  |
| 05140102 | Salt                              | Ohio River    | 429,487   | 170,027 | 750,343   | 111.40 | 44.10  | 194.62 | 12.7 | 19.2 | 6.1  | 23.1 | 16.1 | 22.8 |
| 05140103 | Rolling Fork                      | Ohio River    | 411,974   | 170,696 | 849,846   | 109.81 | 45.50  | 226.53 | 17.0 | 2.8  | 2.3  | 27.1 | 19.0 | 31.8 |
| 05140104 | Blue-Sinking                      | Ohio River    | 310,745   | 119,967 | 541,275   | 63.65  | 24.57  | 110.86 | 19.3 | 5.5  | 4.5  | 29.6 | 20.1 | 21.0 |
| 05140201 | Lower Ohio-Little Pigeon          | Ohio River    | 299,903   | 105,650 | 616,061   | 81.99  | 28.88  | 168.43 | 12.3 | 24.5 | 4.5  | 29.3 | 21.1 | 8.4  |
| 05140202 | Highland-Pigeon                   | Ohio River    | 262,802   | 106,918 | 518,489   | 101.40 | 41.25  | 200.05 | 4.5  | 36.8 | 6.9  | 39.2 | 7.8  | 4.8  |
| 05140203 | Lower Ohio-Bay                    | Ohio River    | 131,801   | 49,818  | 242,353   | 46.99  | 17.76  | 86.40  | 27.9 | 2.5  | 4.8  | 35.6 | 10.2 | 18.8 |
| 05140204 | Saline                            | Ohio River    | 224,652   | 80,098  | 357,938   | 74.15  | 26.44  | 118.14 | 12.2 | 3.4  | 5.6  | 58.5 | 13.3 | 7.0  |
| 05140205 | Tradewater                        | Ohio River    | 180,927   | 75,488  | 348,008   | 74.24  | 30.98  | 142.80 | 16.0 | 13.7 | 2.8  | 31.1 | 20.0 | 16.4 |
| 05140206 | Lower Ohio                        | Lower Ohio    | 186,928   | 78,601  | 408,302   | 70.41  | 29.61  | 153.80 | 11.5 | 11.6 | 6.8  | 38.0 | 18.3 | 13.9 |
| 07010101 | Mississippi Headwaters            | Upper Miss. R | 15,646    | 5,988   | 29,678    | 3.30   | 1.26   | 6.27   | 75.4 | 1.7  | 11.2 | 3.0  | 4.1  | 4.5  |
| 07010102 | Leech Lake                        | Upper Miss. R | 7,222     | 2,303   | 11,930    | 2.21   | 0.71   | 3.66   | 81.9 | 0.4  | 6.6  | 3.3  | 4.5  | 3.3  |
| 07010103 | Prairie-Willow                    | Upper Miss. R | 78,276    | 28,459  | 143,476   | 13.20  | 4.80   | 24.20  | 59.1 | 22.4 | 9.5  | 2.2  | 3.9  | 2.9  |
| 07010104 | Elk-Nokasippi                     | Upper Miss. R | 105,815   | 40,033  | 205,482   | 22.71  | 8.59   | 44.10  | 23.1 | 16.8 | 10.4 | 10.5 | 33.8 | 5.4  |
| 07010105 | Pine                              | Upper Miss. R | 6,044     | 2,410   | 9,477     | 3.04   | 1.21   | 4.77   | 75.8 | 1.9  | 10.3 | 2.4  | 5.6  | 4.0  |
| 07010106 | Crow Wing                         | Upper Miss. R | 53,850    | 19,245  | 117,859   | 10.72  | 3.83   | 23.45  | 32.2 | 9.9  | 13.8 | 15.3 | 22.7 | 6.2  |
| 07010107 | Redeye                            | Upper Miss. R | 39,843    | 14,272  | 74,786    | 19.11  | 6.84   | 35.87  | 16.7 | 6.7  | 9.6  | 25.3 | 37.5 | 4.1  |
| 07010108 | Long Prairie                      | Upper Miss. R | 51,144    | 19,707  | 93,827    | 20.35  | 7.84   | 37.33  | 10.7 | 14.4 | 9.0  | 17.0 | 40.1 | 8.8  |
| 07010201 | Platte-Spunk                      | Upper Miss. R | 119,016   | 42,980  | 227,894   | 46.44  | 16.77  | 88.93  | 4.1  | 19.4 | 5.1  | 15.3 | 51.6 | 4.5  |
| 07010202 | Sauk                              | Upper Miss. R | 145,427   | 49,519  | 261,840   | 56.77  | 19.33  | 102.22 | 1.7  | 9.5  | 5.4  | 20.3 | 58.0 | 5.1  |
| 07010203 | Clearwater-Elk                    | Upper Miss. R | 113,601   | 43,580  | 184,069   | 39.72  | 15.24  | 64.37  | 3.7  | 44.9 | 9.6  | 15.3 | 23.8 | 2.6  |
| 07010204 | Crow                              | Upper Miss. R | 196,098   | 67,305  | 387,926   | 51.18  | 17.57  | 101.25 | 3.0  | 23.7 | 5.6  | 26.6 | 38.5 | 2.6  |
| 07010205 | South Fork Crow                   | Upper Miss. R | 335,714   | 136,739 | 561,096   | 102.15 | 41.60  | 170.72 | 1.3  | 27.1 | 3.2  | 32.0 | 34.4 | 2.0  |
| 07010206 | Twin Cities                       | Upper Miss. R | 1,199,174 | 413,455 | 2,298,260 | 513.69 | 177.11 | 984.51 | 0.4  | 92.9 | 5.6  | 0.7  | 0.5  | 0.1  |
| 07010207 | Rum                               | Upper Miss. R | 99,998    | 37,645  | 208,606   | 24.01  | 9.04   | 50.08  | 20.5 | 15.5 | 12.2 | 17.3 | 28.4 | 6.2  |
| 07020001 | Upper Minnesota                   | Upper Miss. R | 82,157    | 29,500  | 151,908   | 15.27  | 5.48   | 28.24  | 4.3  | 1.0  | 4.9  | 48.8 | 29.3 | 11.7 |
| 07020002 | Pomme De Terre                    | Upper Miss. R | 136,929   | 53,913  | 258,472   | 57.60  | 22.68  | 108.73 | 2.3  | 3.4  | 4.3  | 41.1 | 45.1 | 3.8  |
| 07020003 | Lac Qui Parle                     | Upper Miss. R | 199,488   | 74,203  | 368,656   | 68.55  | 25.50  | 126.68 | 1.9  | 27.3 | 2.9  | 32.2 | 27.5 | 8.2  |
| 07020004 | Hawk-Yellow Medicine              | Upper Miss. R | 402,079   | 158,017 | 753,977   | 77.84  | 30.59  | 145.97 | 1.3  | 7.2  | 3.9  | 37.4 | 47.0 | 3.2  |
| 07020005 | Chippewa                          | Upper Miss. R | 226,300   | 84,769  | 437,344   | 42.05  | 15.75  | 81.27  | 2.8  | 2.9  | 5.6  | 45.6 | 39.5 | 3.7  |
| 07020006 | Redwood                           | Upper Miss. R | 196,418   | 84,781  | 322,906   | 104.05 | 44.91  | 171.06 | 0.7  | 25.3 | 3.1  | 26.0 | 40.6 | 4.4  |
| 07020007 | Middle Minnesota                  | Upper Miss. R | 307,052   | 105,224 | 592,801   | 84.62  | 29.00  | 163.37 | 1.3  | 18.7 | 4.2  | 26.4 | 47.8 | 1.7  |

|          |                        |               |         |         |           |        |       |        |      |      |      |      |      |      |
|----------|------------------------|---------------|---------|---------|-----------|--------|-------|--------|------|------|------|------|------|------|
| 07020008 | Cottonwood             | Upper Miss. R | 264,597 | 114,319 | 558,104   | 81.68  | 35.29 | 172.29 | 0.7  | 4.5  | 3.5  | 34.4 | 53.1 | 3.7  |
| 07020009 | Blue Earth             | Upper Miss. R | 501,353 | 206,834 | 959,148   | 127.15 | 52.46 | 243.26 | 0.4  | 12.3 | 2.8  | 27.1 | 55.2 | 2.0  |
| 07020010 | Watonwan               | Upper Miss. R | 221,336 | 87,036  | 464,275   | 96.55  | 37.97 | 202.53 | 0.4  | 28.0 | 2.9  | 22.6 | 41.6 | 4.5  |
| 07020011 | Le Sueur               | Upper Miss. R | 352,508 | 119,203 | 698,500   | 121.79 | 41.18 | 241.32 | 0.7  | 3.0  | 2.8  | 32.4 | 55.9 | 5.2  |
| 07020012 | Lower Minnesota        | Upper Miss. R | 382,254 | 149,346 | 757,109   | 75.42  | 29.47 | 149.37 | 2.2  | 40.9 | 10.4 | 19.9 | 24.6 | 2.0  |
| 07030001 | Upper St. Croix        | Upper Miss. R | 62,747  | 22,064  | 118,555   | 11.74  | 4.13  | 22.18  | 60.6 | 1.9  | 13.9 | 5.7  | 12.9 | 5.0  |
| 07030002 | Namekagon              | Upper Miss. R | 22,601  | 9,306   | 43,647    | 8.53   | 3.51  | 16.48  | 65.8 | 0.0  | 21.1 | 2.9  | 7.0  | 3.3  |
| 07030003 | Kettle                 | Upper Miss. R | 52,428  | 18,531  | 109,139   | 19.02  | 6.72  | 39.59  | 47.6 | 13.2 | 9.9  | 6.8  | 15.9 | 6.4  |
| 07030004 | Snake                  | Upper Miss. R | 64,144  | 20,902  | 118,802   | 25.12  | 8.19  | 46.53  | 31.7 | 6.8  | 8.2  | 18.2 | 23.6 | 11.6 |
| 07030005 | Lower St. Croix        | Upper Miss. R | 179,671 | 65,985  | 334,749   | 26.89  | 9.87  | 50.09  | 12.4 | 18.7 | 13.9 | 17.6 | 30.5 | 6.9  |
| 07040001 | Rush-Vermillion        | Upper Miss. R | 190,644 | 75,523  | 332,851   | 65.89  | 26.10 | 115.05 | 4.6  | 37.4 | 7.8  | 16.7 | 28.2 | 5.4  |
| 07040002 | Cannon                 | Upper Miss. R | 262,804 | 100,150 | 522,782   | 68.73  | 26.19 | 136.71 | 2.0  | 22.7 | 5.8  | 26.6 | 39.0 | 3.9  |
| 07040003 | Buffalo-Whitewater     | Upper Miss. R | 223,802 | 81,345  | 354,510   | 64.66  | 23.50 | 102.42 | 7.7  | 20.8 | 4.6  | 17.0 | 43.2 | 6.6  |
| 07040004 | Zumbro                 | Upper Miss. R | 317,261 | 107,354 | 579,551   | 85.08  | 28.79 | 155.41 | 2.1  | 11.1 | 5.2  | 29.2 | 47.0 | 5.4  |
| 07040005 | Trempealeau            | Upper Miss. R | 85,158  | 27,994  | 138,002   | 44.87  | 14.75 | 72.72  | 10.4 | 12.6 | 6.2  | 12.4 | 51.3 | 7.1  |
| 07040006 | La Crosse-Pine         | Upper Miss. R | 78,317  | 30,149  | 145,733   | 46.01  | 17.71 | 85.62  | 12.6 | 19.9 | 11.6 | 11.8 | 36.9 | 7.3  |
| 07040007 | Black                  | Upper Miss. R | 227,231 | 93,520  | 427,647   | 38.81  | 15.97 | 73.03  | 15.3 | 4.6  | 7.0  | 12.3 | 52.5 | 8.3  |
| 07040008 | Root                   | Upper Miss. R | 383,669 | 143,604 | 696,435   | 88.46  | 33.11 | 160.58 | 4.1  | 21.0 | 3.2  | 24.6 | 39.3 | 7.8  |
| 07050001 | Upper Chippewa         | Upper Miss. R | 73,587  | 31,451  | 143,400   | 14.71  | 6.29  | 28.66  | 64.8 | 0.6  | 10.7 | 3.5  | 16.4 | 4.0  |
| 07050002 | Flambeau               | Upper Miss. R | 42,915  | 15,079  | 88,134    | 14.20  | 4.99  | 29.15  | 45.0 | 34.7 | 11.0 | 1.2  | 6.3  | 1.8  |
| 07050003 | South Fork Flambeau    | Upper Miss. R | 19,290  | 9,075   | 38,467    | 10.04  | 4.72  | 20.02  | 66.3 | 8.0  | 13.9 | 1.6  | 7.7  | 2.5  |
| 07050004 | Jump                   | Upper Miss. R | 49,216  | 17,555  | 92,376    | 22.60  | 8.06  | 42.42  | 51.0 | 2.6  | 8.3  | 5.3  | 26.2 | 6.6  |
| 07050005 | Lower Chippewa         | Upper Miss. R | 163,620 | 59,458  | 243,195   | 30.68  | 11.15 | 45.61  | 15.3 | 12.0 | 10.2 | 13.3 | 42.5 | 6.7  |
| 07050006 | Eau Claire             | Upper Miss. R | 70,099  | 26,551  | 132,220   | 29.79  | 11.28 | 56.19  | 16.4 | 10.3 | 9.1  | 11.9 | 45.0 | 7.2  |
| 07050007 | Red Cedar              | Upper Miss. R | 140,392 | 50,469  | 244,594   | 28.92  | 10.40 | 50.38  | 11.5 | 13.3 | 8.7  | 13.6 | 48.2 | 4.6  |
| 07060001 | Coon-Yellow            | Upper Miss. R | 253,992 | 101,104 | 482,259   | 69.03  | 27.48 | 131.06 | 10.2 | 4.1  | 4.2  | 19.2 | 47.8 | 14.5 |
| 07060002 | Upper Iowa             | Upper Miss. R | 240,256 | 91,201  | 447,013   | 92.68  | 35.18 | 172.44 | 3.6  | 1.4  | 3.2  | 29.5 | 49.2 | 13.0 |
| 07060003 | Grant-Little Maquoketa | Upper Miss. R | 326,646 | 125,620 | 501,020   | 112.82 | 43.39 | 173.05 | 4.7  | 2.1  | 2.7  | 17.8 | 58.5 | 14.2 |
| 07060004 | Turkey                 | Upper Miss. R | 445,574 | 171,915 | 768,766   | 101.54 | 39.18 | 175.20 | 2.6  | 2.2  | 3.1  | 26.6 | 55.8 | 9.7  |
| 07060005 | Apple-Plum             | Upper Miss. R | 345,332 | 146,263 | 675,912   | 90.00  | 38.12 | 176.16 | 5.0  | 7.4  | 4.3  | 30.8 | 38.6 | 13.9 |
| 07060006 | Maquoketa              | Upper Miss. R | 465,408 | 162,106 | 937,593   | 95.78  | 33.36 | 192.95 | 1.9  | 1.5  | 3.3  | 24.2 | 56.6 | 12.6 |
| 07070001 | Upper Wisconsin        | Upper Miss. R | 85,295  | 33,716  | 190,120   | 14.99  | 5.93  | 33.41  | 33.2 | 52.1 | 11.7 | 1.1  | 1.4  | 0.5  |
| 07070002 | Lake Dubay             | Upper Miss. R | 329,311 | 135,806 | 576,966   | 46.84  | 19.32 | 82.07  | 14.5 | 28.5 | 6.6  | 9.4  | 35.3 | 5.7  |
| 07070003 | Castle Rock            | Upper Miss. R | 716,198 | 284,426 | 1,406,013 | 83.72  | 33.25 | 164.36 | 4.0  | 77.6 | 4.3  | 4.8  | 7.7  | 1.5  |
| 07070004 | Baraboo                | Upper Miss. R | 91,599  | 36,110  | 139,678   | 54.30  | 21.40 | 82.80  | 8.7  | 7.5  | 6.3  | 15.6 | 51.4 | 10.4 |
| 07070005 | Lower Wisconsin        | Upper Miss. R | 255,953 | 96,051  | 473,773   | 42.00  | 15.76 | 77.74  | 15.4 | 4.6  | 7.0  | 15.9 | 46.1 | 11.0 |
| 07070006 | Kickapoo               | Upper Miss. R | 107,562 | 41,150  | 206,702   | 53.71  | 20.55 | 103.21 | 16.2 | 3.2  | 5.3  | 13.4 | 48.7 | 13.1 |
| 07080101 | Copperas-Duck          | Upper Miss. R | 279,258 | 105,273 | 477,630   | 108.32 | 40.83 | 185.27 | 2.6  | 47.2 | 8.1  | 23.0 | 15.2 | 3.8  |
| 07080102 | Upper Wapsipinicon     | Upper Miss. R | 228,129 | 87,596  | 419,295   | 56.31  | 21.62 | 103.49 | 1.1  | 6.0  | 7.5  | 28.8 | 49.2 | 7.5  |
| 07080103 | Lower Wapsipinicon     | Upper Miss. R | 169,459 | 65,443  | 321,798   | 66.63  | 25.73 | 126.53 | 1.5  | 2.2  | 6.0  | 39.4 | 41.2 | 9.7  |
| 07080104 | Flint-Henderson        | Upper Miss. R | 555,712 | 181,509 | 966,224   | 89.89  | 29.36 | 156.29 | 3.8  | 6.5  | 4.8  | 48.5 | 27.5 | 8.9  |
| 07080105 | South Skunk            | Upper Miss. R | 494,697 | 167,244 | 976,257   | 103.11 | 34.86 | 203.49 | 1.1  | 2.5  | 4.5  | 30.8 | 54.6 | 6.6  |
| 07080106 | North Skunk            | Upper Miss. R | 233,706 | 81,567  | 420,824   | 103.52 | 36.13 | 186.41 | 1.3  | 1.6  | 3.2  | 32.5 | 49.3 | 12.1 |
| 07080107 | Skunk                  | Upper Miss. R | 585,199 | 251,686 | 1,328,517 | 136.76 | 58.82 | 310.46 | 3.2  | 1.4  | 2.8  | 29.0 | 52.8 | 10.8 |
| 07080201 | Upper Cedar            | Upper Miss. R | 287,961 | 132,616 | 571,010   | 66.06  | 30.42 | 130.99 | 0.6  | 12.0 | 7.0  | 27.1 | 49.0 | 4.3  |
| 07080202 | Shell Rock             | Upper Miss. R | 170,917 | 61,984  | 308,602   | 60.96  | 22.11 | 110.07 | 0.6  | 27.1 | 7.0  | 26.1 | 35.1 | 4.1  |
| 07080203 | Winnebago              | Upper Miss. R | 104,951 | 40,488  | 204,515   | 59.09  | 22.79 | 115.14 | 0.8  | 7.9  | 8.9  | 38.1 | 40.1 | 4.2  |
| 07080204 | West Fork Cedar        | Upper Miss. R | 158,392 | 60,852  | 317,232   | 71.54  | 27.49 | 143.29 | 0.4  | 1.7  | 5.4  | 28.0 | 60.6 | 3.8  |
| 07080205 | Middle Cedar           | Upper Miss. R | 514,861 | 194,642 | 993,206   | 82.29  | 31.11 | 158.74 | 0.7  | 7.0  | 7.1  | 33.8 | 45.1 | 6.4  |
| 07080206 | Lower Cedar            | Upper Miss. R | 211,686 | 83,999  | 412,395   | 75.29  | 29.88 | 146.68 | 2.0  | 10.3 | 6.2  | 36.1 | 36.8 | 8.7  |
| 07080207 | Upper Iowa             | Upper Miss. R | 485,643 | 181,473 | 891,759   | 128.25 | 47.92 | 235.49 | 0.3  | 1.0  | 3.0  | 19.3 | 72.8 | 3.6  |
| 07080208 | Middle Iowa            | Upper Miss. R | 317,145 | 107,610 | 655,179   | 74.12  | 25.15 | 153.12 | 2.2  | 4.9  | 5.2  | 40.5 | 36.0 | 11.1 |
| 07080209 | Lower Iowa             | Upper Miss. R | 569,099 | 205,317 | 1,094,025 | 128.84 | 46.48 | 247.69 | 1.3  | 3.2  | 3.5  | 27.0 | 55.0 | 9.9  |



|          |                                  |               |           |         |           |        |        |        |      |      |      |      |      |      |
|----------|----------------------------------|---------------|-----------|---------|-----------|--------|--------|--------|------|------|------|------|------|------|
| 07090001 | Upper Rock                       | Upper Miss. R | 444,555   | 151,266 | 795,825   | 58.21  | 19.81  | 104.20 | 2.9  | 43.2 | 7.7  | 13.1 | 29.2 | 3.9  |
| 07090002 | Crawfish                         | Upper Miss. R | 107,431   | 38,993  | 196,709   | 52.51  | 19.06  | 96.14  | 3.5  | 7.7  | 6.1  | 22.2 | 52.9 | 7.7  |
| 07090003 | Pecatonica                       | Upper Miss. R | 511,878   | 195,793 | 875,066   | 105.22 | 40.25  | 179.87 | 2.3  | 6.4  | 3.1  | 33.1 | 45.3 | 9.9  |
| 07090004 | Sugar                            | Upper Miss. R | 120,489   | 46,793  | 176,116   | 61.87  | 24.03  | 90.43  | 3.5  | 10.3 | 5.7  | 27.5 | 45.1 | 8.0  |
| 07090005 | Lower Rock                       | Upper Miss. R | 466,726   | 184,065 | 781,186   | 83.48  | 32.92  | 139.72 | 1.9  | 16.9 | 8.7  | 45.8 | 21.8 | 4.9  |
| 07090006 | Kishwaukee                       | Upper Miss. R | 271,535   | 92,089  | 477,157   | 82.42  | 27.95  | 144.83 | 1.0  | 9.0  | 8.3  | 45.4 | 32.8 | 3.4  |
| 07090007 | Green                            | Upper Miss. R | 170,816   | 69,318  | 360,567   | 59.48  | 24.14  | 125.56 | 1.2  | 3.4  | 6.2  | 56.8 | 28.2 | 4.2  |
| 07100001 | Des Moines Headwaters            | Upper Miss. R | 224,313   | 76,252  | 454,229   | 70.25  | 23.88  | 142.25 | 0.7  | 11.4 | 3.2  | 30.7 | 49.5 | 4.4  |
| 07100002 | Upper Des Moines                 | Upper Miss. R | 249,044   | 91,825  | 467,501   | 87.94  | 32.42  | 165.07 | 0.4  | 2.5  | 3.7  | 23.7 | 65.3 | 4.3  |
| 07100003 | East Fork Des Moines             | Upper Miss. R | 291,690   | 117,629 | 526,775   | 85.44  | 34.46  | 154.30 | 0.3  | 1.3  | 3.6  | 30.7 | 59.8 | 4.2  |
| 07100004 | Middle Des Moines                | Upper Miss. R | 219,142   | 74,752  | 408,063   | 49.71  | 16.96  | 92.57  | 2.0  | 5.3  | 9.7  | 41.0 | 38.1 | 4.0  |
| 07100005 | Boone                            | Upper Miss. R | 252,511   | 99,744  | 480,082   | 109.41 | 43.22  | 208.02 | 0.4  | 3.6  | 3.1  | 24.4 | 66.9 | 1.6  |
| 07100006 | North Raccoon                    | Upper Miss. R | 531,265   | 194,640 | 979,380   | 81.06  | 29.70  | 149.44 | 0.6  | 2.1  | 5.7  | 29.1 | 57.6 | 4.9  |
| 07100007 | South Raccoon                    | Upper Miss. R | 252,398   | 99,295  | 524,759   | 86.03  | 33.84  | 178.86 | 2.1  | 1.4  | 3.6  | 25.6 | 56.5 | 10.7 |
| 07100008 | Lake Red Rock                    | Upper Miss. R | 542,153   | 211,976 | 987,865   | 85.75  | 33.53  | 156.24 | 5.6  | 11.1 | 4.3  | 30.6 | 29.4 | 19.0 |
| 07100009 | Lower Des Moines                 | Upper Miss. R | 591,820   | 257,895 | 1,140,157 | 106.14 | 46.25  | 204.47 | 9.4  | 2.1  | 2.8  | 28.8 | 35.3 | 21.6 |
| 07110001 | Bear-Wyaconda                    | Upper Miss. R | 559,429   | 245,137 | 1,054,237 | 126.97 | 55.64  | 239.27 | 5.4  | 15.7 | 2.7  | 38.3 | 22.3 | 15.6 |
| 07110002 | North Fabius                     | Upper Miss. R | 212,906   | 77,139  | 469,093   | 89.54  | 32.44  | 197.29 | 9.0  | 0.0  | 2.6  | 41.7 | 21.5 | 25.2 |
| 07110003 | South Fabius                     | Upper Miss. R | 166,756   | 62,244  | 286,140   | 102.52 | 38.27  | 175.92 | 7.3  | 0.0  | 2.0  | 50.2 | 18.9 | 21.7 |
| 07110004 | The Sny                          | Upper Miss. R | 466,060   | 174,767 | 1,023,476 | 90.30  | 33.86  | 198.31 | 9.5  | 2.6  | 3.6  | 43.5 | 27.3 | 13.5 |
| 07110005 | North Fork Salt                  | Upper Miss. R | 284,696   | 112,738 | 568,540   | 123.15 | 48.77  | 245.94 | 5.7  | 0.0  | 2.3  | 40.6 | 28.1 | 23.3 |
| 07110006 | South Fork Salt                  | Upper Miss. R | 419,627   | 169,185 | 838,619   | 134.33 | 54.16  | 268.46 | 5.8  | 1.6  | 2.2  | 45.7 | 24.3 | 20.5 |
| 07110007 | Salt                             | Upper Miss. R | 224,574   | 94,873  | 422,405   | 109.40 | 46.22  | 205.78 | 8.8  | 0.0  | 2.2  | 50.7 | 20.8 | 17.5 |
| 07110008 | Cuivre                           | Upper Miss. R | 425,195   | 154,947 | 815,502   | 131.66 | 47.98  | 252.52 | 8.8  | 1.1  | 2.5  | 45.2 | 25.6 | 16.8 |
| 07110009 | Peruque-Piasa                    | Upper Miss. R | 163,444   | 62,337  | 307,878   | 94.01  | 35.85  | 177.08 | 10.2 | 25.9 | 13.5 | 33.2 | 11.3 | 5.8  |
| 07120001 | Kankakee                         | Upper Miss. R | 334,591   | 124,019 | 654,864   | 42.64  | 15.80  | 83.45  | 2.0  | 28.2 | 12.6 | 44.5 | 10.8 | 1.9  |
| 07120002 | Iroquois                         | Upper Miss. R | 325,678   | 134,193 | 657,508   | 58.82  | 24.24  | 118.75 | 0.6  | 3.6  | 6.6  | 69.5 | 18.2 | 1.5  |
| 07120003 | Chicago                          | Upper Miss. R | 536,548   | 192,074 | 1,024,839 | 340.83 | 122.01 | 651.01 | 0.3  | 89.3 | 9.8  | 0.5  | 0.1  | 0.0  |
| 07120004 | Des Plaines                      | Upper Miss. R | 1,332,596 | 496,454 | 2,309,855 | 341.19 | 127.11 | 591.41 | 0.9  | 83.7 | 10.6 | 3.6  | 0.9  | 0.2  |
| 07120005 | Upper Illinois                   | Upper Miss. R | 192,935   | 92,137  | 429,357   | 75.30  | 35.96  | 167.58 | 1.5  | 7.5  | 6.4  | 68.3 | 14.5 | 1.8  |
| 07120006 | Upper Fox                        | Upper Miss. R | 249,232   | 104,578 | 441,349   | 63.39  | 26.60  | 112.26 | 3.1  | 58.7 | 19.7 | 10.3 | 7.0  | 1.2  |
| 07120007 | Lower Fox                        | Upper Miss. R | 258,345   | 96,286  | 496,090   | 90.39  | 33.69  | 173.57 | 0.9  | 31.7 | 12.0 | 35.3 | 18.4 | 1.7  |
| 07130001 | Lower Illinois-Senachwine Lake   | Upper Miss. R | 266,483   | 105,680 | 557,779   | 52.11  | 20.66  | 109.06 | 3.1  | 16.2 | 8.0  | 57.8 | 11.9 | 3.0  |
| 07130002 | Vermilion                        | Upper Miss. R | 297,021   | 116,420 | 704,713   | 86.23  | 33.80  | 204.59 | 0.5  | 4.6  | 4.8  | 66.2 | 22.4 | 1.4  |
| 07130003 | Lower Illinois-Lake Chautauqua   | Upper Miss. R | 289,840   | 122,525 | 588,298   | 74.29  | 31.40  | 150.78 | 7.3  | 22.3 | 8.2  | 44.9 | 10.8 | 6.5  |
| 07130004 | Mackinaw                         | Upper Miss. R | 313,497   | 114,948 | 508,170   | 105.00 | 38.50  | 170.20 | 1.3  | 2.8  | 4.6  | 64.0 | 23.9 | 3.3  |
| 07130005 | Spoon                            | Upper Miss. R | 429,236   | 163,576 | 871,861   | 88.62  | 33.77  | 180.01 | 4.5  | 3.6  | 4.0  | 55.4 | 23.0 | 9.5  |
| 07130006 | Upper Sangamon                   | Upper Miss. R | 358,682   | 153,294 | 733,521   | 95.45  | 40.79  | 195.20 | 0.9  | 25.8 | 6.0  | 60.1 | 5.8  | 1.3  |
| 07130007 | South Fork Sangamon              | Upper Miss. R | 243,235   | 84,420  | 372,376   | 81.37  | 28.24  | 124.57 | 1.4  | 10.2 | 5.5  | 68.2 | 11.5 | 3.2  |
| 07130008 | Lower Sangamon                   | Upper Miss. R | 171,866   | 66,537  | 330,344   | 70.05  | 27.12  | 134.64 | 3.7  | 14.2 | 7.4  | 53.6 | 17.8 | 3.4  |
| 07130009 | Salt                             | Upper Miss. R | 422,124   | 181,796 | 799,721   | 86.63  | 37.31  | 164.12 | 0.9  | 7.7  | 5.4  | 65.4 | 17.9 | 2.7  |
| 07130010 | La Moine                         | Upper Miss. R | 289,076   | 117,447 | 535,423   | 79.69  | 32.38  | 147.61 | 7.1  | 2.7  | 3.8  | 54.6 | 20.5 | 11.2 |
| 07130011 | Lower Illinois                   | Upper Miss. R | 545,077   | 221,199 | 991,279   | 91.71  | 37.22  | 166.78 | 7.6  | 7.3  | 4.0  | 46.7 | 26.6 | 7.7  |
| 07130012 | Macoupin                         | Upper Miss. R | 278,338   | 97,622  | 474,839   | 112.73 | 39.54  | 192.32 | 5.1  | 1.8  | 3.5  | 55.4 | 25.9 | 8.2  |
| 07140101 | Cahokia-Joachim                  | Mississippi R | 1,825,273 | 704,559 | 3,356,550 | 425.40 | 164.20 | 782.27 | 2.2  | 86.0 | 3.5  | 5.0  | 2.2  | 1.1  |
| 07140102 | Meramec                          | Meramec       | 255,734   | 88,770  | 444,578   | 45.89  | 15.93  | 79.78  | 29.1 | 24.5 | 10.7 | 11.6 | 7.5  | 16.5 |
| 07140103 | Bourbeuse                        | Meramec       | 116,953   | 44,046  | 265,969   | 53.72  | 20.23  | 122.16 | 20.1 | 2.0  | 7.0  | 21.1 | 21.0 | 28.8 |
| 07140104 | Big                              | Meramec       | 100,894   | 33,626  | 200,016   | 40.13  | 13.37  | 79.55  | 42.3 | 2.1  | 9.1  | 9.3  | 14.6 | 22.6 |
| 07140105 | Upper Mississippi-Cape Girardeau | Mississippi R | 238,850   | 76,559  | 407,974   | 55.13  | 17.67  | 94.17  | 16.7 | 5.5  | 6.9  | 36.1 | 16.1 | 18.6 |
| 07140106 | Big Muddy                        | Big Muddy     | 463,803   | 189,845 | 809,437   | 74.11  | 30.33  | 129.33 | 11.1 | 7.0  | 6.3  | 49.2 | 16.1 | 10.4 |
| 07140107 | Whitewater                       | Whitewater    | 165,862   | 62,455  | 339,027   | 49.69  | 18.71  | 101.56 | 21.3 | 4.8  | 5.5  | 29.3 | 16.3 | 22.7 |
| 07140108 | Cache                            | Cashe         | 43,389    | 16,160  | 100,547   | 48.78  | 18.17  | 113.03 | 19.6 | 2.3  | 8.0  | 49.5 | 7.6  | 13.0 |
| 07140201 | Upper Kaskaskia                  | Kaskaskia     | 277,113   | 95,240  | 524,683   | 68.43  | 23.52  | 129.57 | 3.9  | 5.6  | 5.4  | 66.4 | 14.4 | 4.3  |

|          |                   |              |         |         |           |        |       |        |      |      |      |      |      |      |
|----------|-------------------|--------------|---------|---------|-----------|--------|-------|--------|------|------|------|------|------|------|
| 07140202 | Middle Kaskaskia  | Kaskaskia    | 569,103 | 234,337 | 1,102,134 | 128.57 | 52.94 | 248.98 | 5.8  | 2.4  | 3.5  | 50.5 | 30.7 | 7.1  |
| 07140203 | Shoal             | Kaskaskia    | 317,054 | 145,111 | 640,800   | 133.12 | 60.93 | 269.05 | 5.1  | 3.6  | 3.4  | 49.7 | 32.1 | 6.2  |
| 07140204 | Lower Kaskaskia   | Kaskaskia    | 517,581 | 219,611 | 1,107,224 | 125.06 | 53.06 | 267.54 | 4.3  | 9.2  | 5.0  | 49.7 | 25.6 | 6.1  |
| 09010001 | Upper Souris      | Souris River | 173,579 | 60,232  | 319,070   | 30.50  | 10.58 | 56.07  | 4.0  | 3.8  | 8.8  | 68.6 | 1.1  | 13.7 |
| 09010002 | Des Lacs          | Souris River | 19,692  | 7,717   | 34,644    | 7.53   | 2.95  | 13.25  | 2.3  | 0.0  | 7.8  | 71.8 | 2.3  | 15.7 |
| 09010003 | Lower Souris      | Souris River | 47,377  | 15,238  | 91,401    | 8.03   | 2.58  | 15.49  | 5.9  | 0.0  | 10.0 | 67.3 | 0.6  | 16.2 |
| 09010004 | Willow            | Souris River | 31,510  | 13,955  | 60,394    | 6.52   | 2.89  | 12.49  | 9.8  | 0.0  | 15.2 | 53.0 | 2.2  | 19.8 |
| 09010005 | Deep              | Souris River | 19,842  | 5,128   | 43,783    | 4.33   | 1.12  | 9.56   | 3.0  | 0.6  | 12.3 | 63.5 | 1.1  | 19.6 |
| 09020101 | Bois De Sioux     | Red River    | 64,675  | 23,021  | 119,006   | 31.96  | 11.38 | 58.81  | 2.7  | 0.7  | 4.6  | 69.2 | 17.1 | 5.7  |
| 09020102 | Mustinka          | Red River    | 155,264 | 65,544  | 276,860   | 57.55  | 24.29 | 102.62 | 1.9  | 1.3  | 3.9  | 68.5 | 21.5 | 2.9  |
| 09020103 | Otter Tail        | Red River    | 117,885 | 46,926  | 262,956   | 21.72  | 8.64  | 48.44  | 6.7  | 10.8 | 8.8  | 37.4 | 31.5 | 4.8  |
| 09020104 | Upper Red         | Red River    | 144,332 | 56,154  | 305,564   | 135.89 | 52.87 | 287.70 | 1.6  | 35.6 | 6.1  | 46.2 | 8.7  | 1.8  |
| 09020105 | Western Wild Rice | Red River    | 243,164 | 82,044  | 438,406   | 41.09  | 13.86 | 74.08  | 2.7  | 0.0  | 5.5  | 68.2 | 14.4 | 9.1  |
| 09020106 | Buffalo           | Red River    | 98,961  | 37,785  | 165,542   | 29.09  | 11.11 | 48.67  | 5.6  | 3.1  | 8.6  | 55.3 | 24.4 | 3.1  |
| 09020107 | Elm-Marsh         | Red River    | 128,149 | 45,088  | 241,707   | 58.50  | 20.58 | 110.34 | 1.2  | 1.3  | 4.2  | 88.3 | 2.7  | 2.3  |
| 09020108 | Eastern Wild Rice | Red River    | 104,216 | 41,127  | 223,219   | 24.23  | 9.56  | 51.89  | 13.1 | 2.0  | 6.8  | 57.7 | 15.2 | 5.2  |
| 09020109 | Goose             | Red River    | 69,934  | 27,346  | 145,034   | 20.47  | 8.00  | 42.45  | 3.8  | 0.9  | 7.6  | 84.0 | 0.6  | 3.1  |
| 09020201 | Devils Lake       | Red River    | 9,706   | 3,554   | 20,080    | 1.05   | 0.38  | 2.17   | 13.0 | 0.0  | 10.9 | 65.9 | 1.9  | 8.3  |
| 09020202 | Upper Sheyenne    | Red River    | 19,171  | 5,961   | 43,093    | 3.71   | 1.15  | 8.33   | 4.5  | 0.0  | 10.2 | 63.2 | 1.7  | 20.5 |
| 09020203 | Middle Sheyenne   | Red River    | 50,599  | 19,507  | 91,933    | 9.58   | 3.69  | 17.41  | 6.9  | 0.0  | 10.2 | 64.8 | 1.7  | 16.3 |
| 09020204 | Lower Sheyenne    | Red River    | 207,980 | 79,606  | 403,315   | 42.89  | 16.42 | 83.17  | 3.2  | 1.7  | 6.7  | 73.5 | 5.3  | 9.6  |
| 09020205 | Maple             | Red River    | 67,666  | 28,192  | 142,284   | 17.40  | 7.25  | 36.58  | 1.7  | 0.0  | 6.0  | 84.5 | 3.3  | 4.5  |
| 09020301 | Sandhill-Wilson   | Red River    | 85,225  | 34,363  | 167,161   | 28.38  | 11.44 | 55.66  | 2.5  | 6.2  | 10.6 | 75.1 | 3.0  | 2.6  |
| 09020302 | Red Lakes         | Red River    | 2,373   | 750     | 5,346     | 0.50   | 0.16  | 1.12   | 81.1 | 0.1  | 6.0  | 2.3  | 4.8  | 5.7  |
| 09020303 | Red Lake          | Red River    | 91,450  | 32,380  | 179,641   | 28.21  | 9.99  | 55.42  | 11.6 | 19.4 | 10.1 | 48.4 | 6.2  | 4.5  |
| 09020304 | Thief             | Red River    | 14,285  | 5,819   | 27,480    | 5.05   | 2.06  | 9.72   | 23.4 | 0.2  | 9.9  | 54.7 | 7.0  | 4.7  |
| 09020305 | Clearwater        | Red River    | 51,313  | 17,661  | 103,002   | 14.85  | 5.11  | 29.80  | 23.0 | 5.9  | 11.6 | 35.8 | 13.6 | 10.0 |
| 09020306 | Grand Marais-Red  | Red River    | 53,001  | 20,825  | 108,776   | 43.67  | 17.16 | 89.63  | 1.8  | 5.1  | 7.3  | 76.8 | 4.9  | 4.1  |
| 09020307 | Turtle            | Red River    | 58,995  | 24,049  | 129,403   | 33.35  | 13.59 | 73.14  | 1.5  | 36.9 | 5.2  | 52.8 | 1.5  | 2.1  |
| 09020308 | Forest            | Red River    | 42,681  | 17,463  | 71,402    | 15.93  | 6.52  | 26.65  | 2.8  | 0.0  | 5.7  | 86.4 | 0.9  | 4.2  |
| 09020309 | Snake             | Red River    | 42,960  | 17,047  | 78,123    | 15.72  | 6.24  | 28.59  | 3.7  | 2.8  | 9.5  | 73.7 | 6.4  | 4.0  |
| 09020310 | Park              | Red River    | 83,619  | 30,653  | 152,201   | 27.41  | 10.05 | 49.90  | 2.1  | 1.8  | 5.9  | 86.3 | 0.0  | 3.9  |
| 09020311 | Lower Red         | Red River    | 63,646  | 21,925  | 131,609   | 31.94  | 11.00 | 66.05  | 4.3  | 1.1  | 8.7  | 78.2 | 2.9  | 4.8  |
| 09020312 | Two Rivers        | Red River    | 78,334  | 29,695  | 159,174   | 26.66  | 10.11 | 54.17  | 9.2  | 1.7  | 9.4  | 65.5 | 7.5  | 6.7  |
| 09020313 | Pembina           | Red River    | 83,515  | 33,281  | 142,936   | 24.06  | 9.59  | 41.19  | 5.1  | 0.0  | 6.0  | 86.1 | 0.0  | 2.8  |
| 09020314 | Roseau            | Rainy River  | 53,679  | 19,621  | 93,686    | 12.71  | 4.64  | 22.17  | 27.7 | 7.1  | 9.6  | 37.5 | 14.0 | 4.2  |
| 09030001 | Rainy Headwaters  | Rainy River  | 6,746   | 2,886   | 12,885    | 0.88   | 0.38  | 1.68   | 99.2 | 0.0  | 0.8  | 0.0  | 0.0  | 0.1  |
| 09030002 | Vermilion         | Rainy River  | 15,283  | 5,840   | 30,219    | 5.71   | 2.18  | 11.29  | 91.4 | 3.7  | 3.7  | 0.1  | 0.3  | 0.8  |
| 09030003 | Rainy Lake        | Rainy River  | 21,281  | 6,914   | 40,883    | 7.49   | 2.43  | 14.38  | 94.5 | 0.0  | 2.4  | 0.8  | 0.6  | 1.7  |
| 09030004 | Upper Rainy       | Rainy River  | 11,024  | 4,126   | 22,611    | 3.66   | 1.37  | 7.50   | 97.1 | 0.0  | 1.5  | 0.4  | 0.3  | 0.8  |
| 09030005 | Little Fork       | Rainy River  | 57,231  | 27,658  | 99,695    | 11.68  | 5.64  | 20.34  | 88.7 | 0.8  | 6.3  | 0.9  | 1.2  | 2.1  |
| 09030006 | Big Fork          | Rainy River  | 56,139  | 21,516  | 128,584   | 10.26  | 3.93  | 23.50  | 90.2 | 1.2  | 4.8  | 1.0  | 0.8  | 1.9  |
| 09030007 | Rapid             | Rainy River  | 30,902  | 11,078  | 60,592    | 11.27  | 4.04  | 22.10  | 92.1 | 0.0  | 2.6  | 2.9  | 0.9  | 1.6  |
| 09030008 | Lower Rainy       | Rainy River  | 5,452   | 2,146   | 11,007    | 4.36   | 1.71  | 8.79   | 67.0 | 0.0  | 11.3 | 13.3 | 3.4  | 5.0  |
| 09030009 | Lake of the Woods | Rainy River  | 14,728  | 4,954   | 29,837    | 6.87   | 2.31  | 13.92  | 49.5 | 0.6  | 12.0 | 24.7 | 8.8  | 4.4  |

Table S5\_TN. Total annual nitrogen and phosphorus loads and yields, with confidence intervals, for HUC8 watersheds of Major River Basin 3 (MRB3). Accumulated nondelivered loads and yields from each individual HUC8 (based on sum of incremental loads), and does not include loads from upstream HUC8s. Direct results from the SPARROW models: not corrected for any spatial biases.

Supplemental Material to Robertson and Saad, 2011, *Journal of the American Water Resources Association, Nutrient Inputs to the Laurentian Great Lakes By Source and River Basin Estimated Using SPARROW Watershed Models.*

The total load for each HUC8 watershed was calculated by summing the simulated incremental loads from each SPARROW reach within a HUC8 watershed. Yield is load per unit area of the HUC8 watershed.

[%; percent; CI, Confidence interval; kg, kilogram; ha, hectare]

HUC8's are based on Seaber, P.R., F.P. Kapinos, and G.L. Knapp, 1987. Hydrologic Unit maps: U.S. Geol. Surv. Water-Supply Paper 2294, 63 p. Available online at: <http://water.usgs.gov/GIS/huc.html>

| HUC8     | HUC8 NAME             | Great Lake/Basin | Total Nitrogen Load (kg) | Lower 95% CI Total Nitrogen Load (kg) | Upper 95% CI Total Nitrogen Load (kg) | Total Nitrogen Yield (kg/km <sup>2</sup> ) | Lower 95% CI Total Nitrogen Yield (kg/km <sup>2</sup> ) | Upper 95% CI Total Nitrogen Yield (kg/km <sup>2</sup> ) | Percent Contribution by Source |               |                                 |                  |                   |
|----------|-----------------------|------------------|--------------------------|---------------------------------------|---------------------------------------|--------------------------------------------|---------------------------------------------------------|---------------------------------------------------------|--------------------------------|---------------|---------------------------------|------------------|-------------------|
|          |                       |                  |                          |                                       |                                       |                                            |                                                         |                                                         | Atmosphere                     | Point sources | Additional agricultural sources | Farm fertilizers | Manure (confined) |
| 04010101 | Baptism-Brule         | Lake Superior    | 700,720                  | 309,197                               | 1,248,652                             | 119.94                                     | 52.92                                                   | 213.73                                                  | 98.3                           | 1.4           | 0.3                             | 0.0              | 0.0               |
| 04010102 | Beaver-Lester         | Lake Superior    | 988,551                  | 487,648                               | 1,806,756                             | 578.45                                     | 285.35                                                  | 1,057.23                                                | 33.1                           | 66.0          | 0.1                             | 0.3              | 0.4               |
| 04010201 | St. Louis             | Lake Superior    | 1,361,701                | 734,263                               | 2,210,806                             | 183.42                                     | 98.91                                                   | 297.80                                                  | 84.0                           | 10.0          | 1.1                             | 1.8              | 3.1               |
| 04010202 | Cloquet               | Lake Superior    | 158,148                  | 78,606                                | 320,659                               | 79.67                                      | 39.60                                                   | 161.54                                                  | 97.8                           | 0.0           | 0.4                             | 0.7              | 1.1               |
| 04010301 | Beartrap-Nemadji      | Lake Superior    | 1,863,229                | 915,066                               | 3,164,297                             | 385.19                                     | 189.17                                                  | 654.17                                                  | 72.3                           | 16.1          | 1.7                             | 2.0              | 7.9               |
| 04010302 | Bad-Montreal          | Lake Superior    | 895,149                  | 404,910                               | 1,747,682                             | 268.12                                     | 121.28                                                  | 523.47                                                  | 81.3                           | 5.1           | 4.6                             | 2.2              | 6.8               |
| 04020101 | Black-Presque Isle    | Lake Superior    | 552,804                  | 270,361                               | 890,174                               | 209.80                                     | 102.61                                                  | 337.84                                                  | 91.8                           | 6.1           | 1.8                             | 0.1              | 0.2               |
| 04020102 | Ontonagon             | Lake Superior    | 677,576                  | 280,177                               | 1,071,461                             | 187.17                                     | 77.39                                                   | 295.98                                                  | 86.7                           | 0.9           | 8.9                             | 0.7              | 2.8               |
| 04020103 | Keweenaw Peninsula    | Lake Superior    | 524,460                  | 245,489                               | 793,161                               | 183.03                                     | 85.67                                                   | 276.81                                                  | 83.3                           | 11.6          | 3.1                             | 0.7              | 1.3               |
| 04020104 | Sturgeon              | Lake Superior    | 367,030                  | 179,834                               | 567,178                               | 198.58                                     | 97.30                                                   | 306.86                                                  | 87.8                           | 0.0           | 7.7                             | 1.5              | 3.0               |
| 04020105 | Dead-Kelsey           | Lake Superior    | 437,294                  | 245,208                               | 703,593                               | 184.38                                     | 103.39                                                  | 296.66                                                  | 81.4                           | 16.8          | 1.2                             | 0.2              | 0.4               |
| 04020201 | Betsy-Chocolay        | Lake Superior    | 549,281                  | 279,169                               | 1,015,276                             | 183.55                                     | 93.29                                                   | 339.27                                                  | 92.4                           | 5.6           | 0.7                             | 0.5              | 0.8               |
| 04020202 | Tahquamenon           | Lake Superior    | 404,031                  | 226,119                               | 747,649                               | 189.00                                     | 105.78                                                  | 349.74                                                  | 94.9                           | 3.7           | 0.5                             | 0.6              | 0.3               |
| 04020203 | Waiska                | Lake Superior    | 225,128                  | 104,767                               | 396,769                               | 286.28                                     | 133.23                                                  | 504.55                                                  | 74.6                           | 5.5           | 14.8                            | 1.0              | 4.2               |
| 04030101 | Manitowoc-Sheboygan   | Lake Michigan    | 6,820,879                | 3,503,702                             | 12,295,333                            | 1,598.87                                   | 821.30                                                  | 2,882.14                                                | 18.6                           | 9.1           | 14.3                            | 16.6             | 41.5              |
| 04030102 | Door-Kewaunee         | Lake Michigan    | 2,384,751                | 1,164,183                             | 4,242,311                             | 1,205.33                                   | 588.42                                                  | 2,144.21                                                | 20.4                           | 22.1          | 7.0                             | 15.5             | 34.9              |
| 04030103 | Duck-Pensaukee        | Lake Michigan    | 1,156,920                | 529,154                               | 1,944,539                             | 896.24                                     | 409.92                                                  | 1,506.39                                                | 21.4                           | 1.7           | 18.0                            | 18.5             | 40.4              |
| 04030104 | Oconto                | Lake Michigan    | 1,223,624                | 603,757                               | 1,918,827                             | 453.12                                     | 223.58                                                  | 710.56                                                  | 43.4                           | 3.6           | 14.0                            | 14.0             | 25.0              |
| 04030105 | Peshigo               | Lake Michigan    | 900,597                  | 485,684                               | 1,719,912                             | 301.24                                     | 162.46                                                  | 575.29                                                  | 52.2                           | 4.4           | 13.8                            | 10.6             | 19.0              |
| 04030106 | Brule                 | Lake Michigan    | 506,234                  | 254,559                               | 803,068                               | 186.14                                     | 93.60                                                   | 295.28                                                  | 85.5                           | 3.5           | 6.2                             | 2.9              | 1.8               |
| 04030107 | Michigamme            | Lake Michigan    | 188,878                  | 89,043                                | 307,510                               | 103.12                                     | 48.61                                                   | 167.89                                                  | 97.0                           | 1.4           | 0.9                             | 0.4              | 0.2               |
| 04030108 | Menominee             | Lake Michigan    | 1,512,318                | 705,524                               | 2,554,776                             | 253.17                                     | 118.11                                                  | 427.69                                                  | 65.8                           | 11.8          | 8.2                             | 5.0              | 9.2               |
| 04030109 | Cedar-Ford            | Lake Michigan    | 673,234                  | 272,064                               | 971,717                               | 253.17                                     | 102.31                                                  | 365.41                                                  | 72.6                           | 3.5           | 7.9                             | 5.7              | 10.3              |
| 04030110 | Escanaba              | Lake Michigan    | 463,985                  | 258,981                               | 789,513                               | 194.23                                     | 108.41                                                  | 330.50                                                  | 83.1                           | 5.4           | 4.7                             | 3.0              | 3.8               |
| 04030111 | Tacoosh-Whitefish     | Lake Michigan    | 360,218                  | 154,368                               | 527,475                               | 216.67                                     | 92.85                                                   | 317.28                                                  | 84.3                           | 6.1           | 4.3                             | 2.4              | 3.0               |
| 04030112 | Fishdam-Sturgeon      | Lake Michigan    | 335,007                  | 149,231                               | 591,677                               | 222.78                                     | 99.24                                                   | 393.47                                                  | 82.0                           | 0.0           | 8.5                             | 4.7              | 4.8               |
| 04030201 | Upper Fox             | Lake Michigan    | 2,911,491                | 1,700,298                             | 5,262,546                             | 672.28                                     | 392.61                                                  | 1,215.15                                                | 26.2                           | 8.7           | 21.4                            | 24.3             | 19.3              |
| 04030202 | Wolf                  | Lake Michigan    | 5,052,305                | 2,732,733                             | 7,481,839                             | 525.48                                     | 284.23                                                  | 778.17                                                  | 29.2                           | 3.5           | 17.7                            | 20.0             | 29.7              |
| 04030203 | Lake Winnebago        | Lake Michigan    | 501,293                  | 235,687                               | 891,363                               | 376.17                                     | 176.86                                                  | 668.88                                                  | 24.0                           | 10.3          | 15.8                            | 18.7             | 31.2              |
| 04030204 | Lower Fox             | Lake Michigan    | 2,775,680                | 1,590,514                             | 5,132,524                             | 2,350.88                                   | 1,347.09                                                | 4,347.02                                                | 10.6                           | 47.6          | 8.2                             | 9.4              | 24.1              |
| 04040001 | Little Calumet-Galien | Lake Michigan    | 2,784,993                | 1,678,699                             | 4,579,040                             | 1,519.84                                   | 916.11                                                  | 2,498.89                                                | 22.9                           | 49.2          | 9.7                             | 16.1             | 2.1               |
| 04040002 | Pike-Root             | Lake Michigan    | 4,508,049                | 2,244,893                             | 7,820,173                             | 4,277.61                                   | 2,130.14                                                | 7,420.43                                                | 9.4                            | 77.6          | 5.2                             | 5.4              | 2.3               |
| 04040003 | Milwaukee             | Lake Michigan    | 2,295,809                | 1,033,554                             | 3,979,893                             | 1,015.96                                   | 457.38                                                  | 1,761.22                                                | 25.4                           | 18.9          | 14.5                            | 15.1             | 26.0              |

|          |                       |               |            |            |            |          |          |           |      |      |      |      |      |
|----------|-----------------------|---------------|------------|------------|------------|----------|----------|-----------|------|------|------|------|------|
| 04050001 | St. Joseph            | Lake Michigan | 15,088,761 | 7,038,707  | 24,137,831 | 1,227.22 | 572.48   | 1,963.20  | 24.3 | 9.3  | 19.0 | 31.2 | 16.2 |
| 04050002 | Black-Macatawa        | Lake Michigan | 1,797,611  | 886,474    | 2,889,680  | 1,221.06 | 602.15   | 1,962.87  | 23.8 | 15.3 | 13.9 | 20.0 | 27.0 |
| 04050003 | Kalamazoo             | Lake Michigan | 5,739,352  | 2,735,719  | 9,265,705  | 1,093.41 | 521.19   | 1,765.23  | 25.3 | 17.1 | 13.8 | 22.6 | 21.3 |
| 04050004 | Upper Grand           | Lake Michigan | 4,211,819  | 2,315,294  | 6,909,532  | 927.62   | 509.92   | 1,521.77  | 28.0 | 21.3 | 15.6 | 23.9 | 11.2 |
| 04050005 | Maple                 | Lake Michigan | 3,804,576  | 1,886,363  | 6,430,752  | 1,543.92 | 765.50   | 2,609.64  | 22.6 | 1.9  | 21.0 | 35.5 | 18.9 |
| 04050006 | Lower Grand           | Lake Michigan | 6,105,806  | 3,202,811  | 10,349,679 | 1,228.04 | 644.17   | 2,081.59  | 23.7 | 19.7 | 12.9 | 22.6 | 21.0 |
| 04050007 | Thornapple            | Lake Michigan | 2,144,735  | 1,192,891  | 3,690,093  | 962.47   | 535.32   | 1,655.96  | 31.7 | 3.2  | 19.8 | 30.1 | 15.3 |
| 04060101 | Pere Marquette-White  | Lake Michigan | 2,889,841  | 1,269,227  | 4,234,558  | 516.76   | 226.96   | 757.22    | 44.8 | 16.3 | 12.4 | 16.6 | 9.9  |
| 04060102 | Muskegon              | Lake Michigan | 2,714,116  | 1,261,471  | 5,203,536  | 385.15   | 179.01   | 738.41    | 51.5 | 2.9  | 12.3 | 14.7 | 18.6 |
| 04060103 | Manistee              | Lake Michigan | 1,545,539  | 721,556    | 2,995,434  | 306.30   | 143.00   | 593.64    | 67.3 | 15.3 | 8.7  | 4.9  | 3.8  |
| 04060104 | Betsie-Platte         | Lake Michigan | 572,094    | 266,578    | 981,718    | 277.13   | 129.14   | 475.56    | 70.4 | 2.4  | 12.7 | 11.1 | 3.4  |
| 04060105 | Boardman-Charlevoix   | Lake Michigan | 1,097,596  | 576,107    | 2,206,576  | 250.30   | 131.38   | 503.20    | 59.0 | 9.8  | 15.3 | 10.5 | 5.4  |
| 04060106 | Manistique            | Lake Michigan | 575,183    | 255,548    | 981,440    | 152.25   | 67.64    | 259.78    | 91.6 | 5.3  | 1.5  | 0.9  | 0.7  |
| 04060107 | Brevoort-Millecoquins | Lake Michigan | 275,966    | 119,827    | 596,646    | 179.91   | 78.12    | 388.97    | 91.6 | 0.0  | 3.9  | 1.0  | 3.5  |
| 04070001 | St. Marys             | Lake Huron    | 510,910    | 278,947    | 856,347    | 406.43   | 221.90   | 681.22    | 60.8 | 12.0 | 19.1 | 1.4  | 6.6  |
| 04070002 | Carp-Pine             | Lake Huron    | 410,795    | 206,654    | 774,853    | 242.74   | 122.11   | 457.87    | 81.4 | 9.4  | 6.6  | 0.5  | 2.2  |
| 04070003 | Lone Lake-Ocqueoc     | Lake Huron    | 524,600    | 274,685    | 877,062    | 256.84   | 134.48   | 429.40    | 69.3 | 10.2 | 6.1  | 8.7  | 5.7  |
| 04070004 | Cheboygan             | Lake Huron    | 191,377    | 86,216     | 320,479    | 81.87    | 36.88    | 137.10    | 76.7 | 0.9  | 11.7 | 4.6  | 6.1  |
| 04070005 | Black                 | Lake Huron    | 124,744    | 56,803     | 213,380    | 79.86    | 36.36    | 136.60    | 83.8 | 0.0  | 6.6  | 5.1  | 4.5  |
| 04070006 | Thunder Bay           | Lake Huron    | 673,503    | 368,302    | 1,145,223  | 203.74   | 111.42   | 346.44    | 65.6 | 6.9  | 7.9  | 9.3  | 10.3 |
| 04070007 | Au Sable              | Lake Huron    | 868,160    | 427,581    | 1,661,686  | 164.91   | 81.22    | 315.64    | 90.7 | 1.2  | 2.9  | 2.0  | 3.2  |
| 04080101 | Au Gres-Rifle         | Lake Huron    | 1,128,943  | 494,239    | 2,021,715  | 422.59   | 185.01   | 756.77    | 51.1 | 5.9  | 9.8  | 17.5 | 15.6 |
| 04080102 | Kawkawlin-Pine        | Lake Huron    | 1,624,239  | 772,693    | 3,113,373  | 1,280.11 | 608.98   | 2,453.74  | 29.1 | 0.6  | 23.0 | 42.8 | 4.5  |
| 04080103 | Pigeon-Wiscoggin      | Lake Huron    | 5,460,093  | 2,256,371  | 9,801,255  | 2,515.58 | 1,039.56 | 4,515.65  | 17.2 | 1.5  | 23.5 | 41.4 | 16.3 |
| 04080104 | Birch-Willow          | Lake Huron    | 2,612,370  | 1,430,649  | 4,723,372  | 1,791.87 | 981.31   | 3,239.85  | 19.0 | 2.3  | 20.7 | 38.1 | 19.9 |
| 04080201 | Tittabawassee         | Lake Huron    | 1,816,493  | 901,835    | 3,309,424  | 492.51   | 244.52   | 897.29    | 43.6 | 13.2 | 14.0 | 19.4 | 9.7  |
| 04080202 | Pine                  | Lake Huron    | 2,681,004  | 1,297,738  | 3,985,737  | 970.88   | 469.95   | 1,443.37  | 31.4 | 4.8  | 20.0 | 29.5 | 14.3 |
| 04080203 | Shiawassee            | Lake Huron    | 3,361,079  | 1,683,145  | 5,287,558  | 1,168.45 | 585.13   | 1,838.17  | 28.0 | 4.4  | 23.1 | 36.5 | 8.1  |
| 04080204 | Flint                 | Lake Huron    | 3,394,194  | 1,690,544  | 5,141,172  | 878.33   | 437.47   | 1,330.40  | 28.7 | 27.5 | 14.9 | 23.2 | 5.7  |
| 04080205 | Cass                  | Lake Huron    | 2,864,282  | 1,339,000  | 4,466,686  | 1,193.07 | 557.74   | 1,860.52  | 26.9 | 2.6  | 20.2 | 38.7 | 11.6 |
| 04080206 | Saginaw               | Lake Huron    | 2,848,255  | 1,386,081  | 4,922,129  | 4,273.64 | 2,079.73 | 7,385.37  | 10.4 | 59.0 | 10.6 | 18.1 | 1.9  |
| 04090001 | St. Clair             | Lake Erie     | 3,407,801  | 1,358,946  | 5,572,562  | 1,020.10 | 406.79   | 1,668.10  | 29.0 | 11.0 | 21.2 | 28.5 | 10.3 |
| 04090002 | Lake St. Clair        | Lake Erie     | 253,689    | 123,551    | 487,096    | 509.79   | 248.28   | 978.83    | 56.5 | 42.0 | 0.7  | 0.6  | 0.1  |
| 04090003 | Clinton               | Lake Erie     | 1,990,381  | 844,137    | 3,110,462  | 774.56   | 328.50   | 1,210.45  | 29.0 | 53.8 | 6.3  | 8.8  | 2.0  |
| 04090004 | Detroit               | Lake Erie     | 13,919,875 | 6,419,893  | 27,913,197 | 5,555.17 | 2,562.06 | 11,139.66 | 4.5  | 95.0 | 0.1  | 0.3  | 0.1  |
| 04090005 | Huron                 | Lake Erie     | 1,807,380  | 820,459    | 3,527,973  | 756.23   | 343.29   | 1,476.14  | 28.5 | 45.6 | 6.9  | 14.7 | 4.3  |
| 04100001 | Ottawa-Stony          | Lake Erie     | 2,773,681  | 1,470,831  | 4,124,611  | 1,655.44 | 877.85   | 2,461.73  | 26.6 | 6.8  | 21.1 | 40.2 | 5.3  |
| 04100002 | Raisin                | Lake Erie     | 5,437,430  | 2,919,945  | 8,067,315  | 1,912.51 | 1,027.04 | 2,837.53  | 23.9 | 8.5  | 22.1 | 35.6 | 9.8  |
| 04100003 | St. Joseph            | Lake Erie     | 5,963,017  | 2,661,307  | 10,638,990 | 2,121.86 | 946.99   | 3,785.74  | 24.9 | 2.2  | 23.2 | 39.4 | 10.3 |
| 04100004 | St. Marys             | Lake Erie     | 11,884,023 | 5,671,338  | 19,528,331 | 5,771.69 | 2,754.39 | 9,484.28  | 13.4 | 1.3  | 18.0 | 33.7 | 33.5 |
| 04100005 | Upper Maumee          | Lake Erie     | 4,334,829  | 2,094,288  | 7,129,389  | 4,863.00 | 2,349.46 | 7,998.06  | 16.4 | 29.8 | 20.8 | 28.0 | 5.1  |
| 04100006 | Tiffin                | Lake Erie     | 6,448,329  | 3,060,166  | 9,929,018  | 3,125.52 | 1,483.27 | 4,812.62  | 21.3 | 1.5  | 25.9 | 41.0 | 10.3 |
| 04100007 | Auglaize              | Lake Erie     | 23,202,188 | 10,253,721 | 44,190,524 | 5,183.06 | 2,290.55 | 9,871.58  | 18.1 | 3.0  | 25.1 | 44.8 | 9.0  |
| 04100008 | Blanchard             | Lake Erie     | 8,188,925  | 3,837,818  | 12,501,518 | 4,267.69 | 2,000.09 | 6,515.21  | 19.3 | 2.8  | 26.3 | 43.6 | 8.1  |
| 04100009 | Lower Maumee          | Lake Erie     | 11,824,611 | 6,733,553  | 19,633,256 | 4,333.44 | 2,467.69 | 7,195.12  | 16.8 | 14.7 | 21.9 | 41.9 | 4.8  |
| 04100010 | Cedar-Portage         | Lake Erie     | 10,447,629 | 5,276,705  | 17,441,996 | 4,183.89 | 2,113.12 | 6,984.87  | 20.4 | 2.5  | 27.4 | 46.8 | 2.8  |
| 04100011 | Sandusky              | Lake Erie     | 19,259,894 | 9,629,829  | 30,515,467 | 4,017.98 | 2,008.96 | 6,366.10  | 19.2 | 2.1  | 25.1 | 46.9 | 6.7  |
| 04100012 | Huron-Vermilion       | Lake Erie     | 3,833,563  | 1,839,649  | 8,207,346  | 1,942.87 | 932.35   | 4,159.54  | 19.9 | 5.5  | 24.0 | 42.9 | 7.7  |
| 04110001 | Black-Rocky           | Lake Erie     | 4,148,902  | 1,975,842  | 7,186,809  | 1,768.85 | 842.39   | 3,064.04  | 20.9 | 40.7 | 10.4 | 20.8 | 7.2  |

|          |                                |              |           |           |            |          |          |          |      |      |      |      |      |
|----------|--------------------------------|--------------|-----------|-----------|------------|----------|----------|----------|------|------|------|------|------|
| 04110002 | Cuyahoga                       | Lake Erie    | 4,468,976 | 2,268,143 | 6,563,351  | 2,137.44 | 1,084.82 | 3,139.14 | 13.4 | 78.6 | 2.0  | 4.1  | 1.7  |
| 04110003 | Ashtabula-Chagrin              | Lake Erie    | 3,621,720 | 1,565,383 | 5,800,159  | 2,247.27 | 971.32   | 3,598.98 | 17.3 | 69.3 | 3.4  | 7.5  | 2.6  |
| 04110004 | Grand                          | Lake Erie    | 1,896,581 | 897,803   | 3,392,822  | 1,031.34 | 488.21   | 1,844.98 | 40.2 | 1.8  | 17.7 | 27.3 | 13.1 |
| 04120101 | Chautauqua-Conneaut            | Lake Erie    | 3,382,203 | 1,466,694 | 5,099,897  | 1,508.57 | 654.19   | 2,274.71 | 30.5 | 38.7 | 9.9  | 8.6  | 12.3 |
| 04120102 | Cattaraugus                    | Lake Erie    | 1,415,283 | 652,251   | 2,537,783  | 976.47   | 450.02   | 1,750.93 | 42.5 | 3.7  | 14.3 | 10.6 | 28.9 |
| 04120103 | Buffalo-Eighteenmile           | Lake Erie    | 2,592,539 | 1,306,281 | 4,465,456  | 1,392.18 | 701.46   | 2,397.92 | 30.4 | 33.3 | 6.9  | 8.6  | 20.8 |
| 04120104 | Niagara                        | Lake Ontario | 6,787,416 | 3,212,136 | 11,932,202 | 2,687.69 | 1,271.95 | 4,724.93 | 12.6 | 71.2 | 3.2  | 4.4  | 8.6  |
| 04130001 | Oak Orchard-Twelvevile         | Lake Ontario | 2,391,829 | 1,272,141 | 3,690,735  | 717.45   | 381.59   | 1,107.06 | 33.4 | 22.6 | 16.3 | 17.0 | 10.6 |
| 04130002 | Upper Genesee                  | Lake Ontario | 2,407,792 | 1,237,369 | 4,863,548  | 655.39   | 336.81   | 1,323.84 | 36.7 | 4.3  | 11.5 | 12.6 | 34.9 |
| 04130003 | Lower Genesee                  | Lake Ontario | 2,891,557 | 1,298,600 | 5,433,498  | 1,048.63 | 470.94   | 1,970.47 | 26.3 | 9.2  | 14.8 | 18.4 | 31.3 |
| 04140101 | Irondequoit-Ninemile           | Lake Ontario | 2,813,941 | 1,134,424 | 5,266,751  | 1,541.78 | 621.56   | 2,885.69 | 18.1 | 65.5 | 3.7  | 6.1  | 6.5  |
| 04140102 | Salmon-Sandy                   | Lake Ontario | 2,335,437 | 1,116,846 | 3,836,089  | 941.04   | 450.02   | 1,545.71 | 70.7 | 3.2  | 6.0  | 4.4  | 15.8 |
| 04140201 | Seneca                         | Lake Ontario | 6,767,219 | 3,728,817 | 11,418,857 | 758.86   | 418.14   | 1,280.48 | 26.4 | 29.1 | 10.9 | 13.4 | 20.1 |
| 04140202 | Oneida                         | Lake Ontario | 2,389,674 | 1,374,465 | 4,684,693  | 614.68   | 353.54   | 1,205.01 | 55.7 | 9.4  | 7.1  | 7.5  | 20.3 |
| 04140203 | Oswego                         | Lake Ontario | 289,615   | 159,680   | 465,419    | 768.19   | 423.54   | 1,234.50 | 54.2 | 16.8 | 7.1  | 7.9  | 13.9 |
| 04150101 | Black                          | Lake Ontario | 4,014,087 | 1,753,892 | 7,231,202  | 809.51   | 353.70   | 1,458.30 | 63.0 | 4.4  | 4.0  | 5.1  | 23.5 |
| 04150102 | Chaumont-Perch                 | Lake Ontario | 1,386,664 | 611,705   | 2,253,270  | 1,512.64 | 667.28   | 2,457.97 | 50.0 | 2.1  | 6.8  | 6.8  | 34.4 |
| 04150301 | Upper St. Lawrence             | Lake Ontario | 1,205,381 | 610,246   | 2,353,180  | 510.18   | 258.29   | 996.00   | 58.7 | 8.1  | 5.1  | 4.9  | 23.2 |
| 04150302 | Oswegatchie                    | St.Lawrence  | 1,319,452 | 610,002   | 2,120,240  | 504.73   | 233.34   | 811.05   | 67.3 | 2.6  | 2.6  | 4.9  | 22.5 |
| 04150303 | Indian                         | St.Lawrence  | 749,627   | 399,309   | 1,262,627  | 519.64   | 276.80   | 875.25   | 67.1 | 0.8  | 3.1  | 5.0  | 24.0 |
| 04150304 | Grass                          | St.Lawrence  | 916,110   | 523,688   | 1,801,989  | 506.14   | 289.33   | 995.58   | 58.0 | 10.0 | 3.6  | 5.1  | 23.2 |
| 04150305 | Raquette                       | St.Lawrence  | 864,457   | 480,324   | 1,615,614  | 267.66   | 148.72   | 500.23   | 79.4 | 5.7  | 1.6  | 2.4  | 11.0 |
| 04150306 | St. Regis                      | St.Lawrence  | 771,595   | 423,138   | 1,358,314  | 346.01   | 189.75   | 609.11   | 75.4 | 3.8  | 2.8  | 3.3  | 14.7 |
| 04150307 | English-Salmon                 | St.Lawrence  | 760,408   | 419,688   | 1,244,494  | 451.53   | 249.21   | 738.98   | 49.6 | 2.9  | 5.5  | 7.9  | 34.0 |
| 05010001 | Upper Allegheny                | Ohio River   | 3,528,988 | 1,541,738 | 5,732,988  | 529.64   | 231.39   | 860.42   | 72.4 | 7.9  | 4.3  | 4.2  | 11.2 |
| 05010002 | Conewango                      | Ohio River   | 2,092,966 | 1,037,038 | 3,608,936  | 883.95   | 437.98   | 1,524.20 | 49.6 | 6.7  | 10.3 | 8.9  | 24.5 |
| 05010003 | Middle Allegheny-Tionesta      | Ohio River   | 2,500,964 | 1,178,251 | 4,474,868  | 573.17   | 270.03   | 1,025.55 | 76.7 | 4.4  | 5.5  | 5.0  | 8.4  |
| 05010004 | French                         | Ohio River   | 2,821,004 | 1,454,494 | 5,816,571  | 886.30   | 456.97   | 1,827.44 | 51.1 | 3.1  | 13.0 | 13.5 | 19.2 |
| 05010005 | Clarion                        | Ohio River   | 1,850,469 | 888,829   | 3,064,467  | 573.11   | 275.28   | 949.10   | 77.4 | 5.0  | 5.8  | 4.9  | 6.9  |
| 05010006 | Middle Allegheny-Redbank       | Ohio River   | 2,906,298 | 1,426,421 | 5,015,541  | 667.29   | 327.51   | 1,151.58 | 64.7 | 4.4  | 7.2  | 12.1 | 11.7 |
| 05010007 | Conemaugh                      | Ohio River   | 2,766,902 | 1,338,535 | 4,244,206  | 778.79   | 376.75   | 1,194.60 | 56.3 | 9.6  | 4.8  | 14.1 | 15.2 |
| 05010008 | Kiskiminetas                   | Ohio River   | 896,616   | 422,203   | 1,436,405  | 671.77   | 316.33   | 1,076.20 | 61.6 | 13.9 | 4.3  | 8.4  | 11.8 |
| 05010009 | Lower Allegheny                | Ohio River   | 1,019,691 | 574,775   | 1,565,568  | 791.81   | 446.32   | 1,215.69 | 42.9 | 38.9 | 6.3  | 6.0  | 5.9  |
| 05020001 | Tygart Valley                  | Ohio River   | 2,119,982 | 1,042,194 | 3,761,187  | 596.66   | 293.32   | 1,058.56 | 82.5 | 4.8  | 5.2  | 5.3  | 2.2  |
| 05020002 | West Fork                      | Ohio River   | 1,193,687 | 615,399   | 1,871,255  | 520.49   | 268.34   | 815.94   | 75.7 | 15.0 | 3.2  | 4.3  | 1.8  |
| 05020003 | Upper Monongahela              | Ohio River   | 802,383   | 376,657   | 1,543,430  | 672.34   | 315.61   | 1,293.29 | 57.2 | 34.7 | 3.4  | 2.3  | 2.3  |
| 05020004 | Cheat                          | Ohio River   | 2,193,106 | 1,042,945 | 3,888,050  | 589.86   | 280.51   | 1,045.73 | 88.6 | 1.9  | 2.8  | 3.7  | 3.1  |
| 05020005 | Lower Monongahela              | Ohio River   | 2,474,748 | 1,094,204 | 3,934,784  | 648.85   | 286.89   | 1,031.66 | 52.6 | 30.8 | 3.6  | 5.0  | 8.0  |
| 05020006 | Youghiogheny                   | Ohio River   | 3,312,912 | 1,711,150 | 5,712,489  | 730.92   | 377.53   | 1,260.33 | 55.3 | 7.8  | 4.9  | 12.5 | 19.5 |
| 05030101 | Upper Ohio                     | Ohio River   | 6,568,610 | 3,362,411 | 10,208,614 | 1,269.01 | 649.60   | 1,972.24 | 23.0 | 61.4 | 3.8  | 5.6  | 6.2  |
| 05030102 | Shenango                       | Ohio River   | 2,007,203 | 1,059,444 | 3,719,833  | 727.05   | 383.75   | 1,347.39 | 38.2 | 13.2 | 15.4 | 15.9 | 17.3 |
| 05030103 | Mahoning                       | Ohio River   | 3,144,531 | 1,403,591 | 5,138,732  | 1,081.51 | 482.74   | 1,767.38 | 24.7 | 44.1 | 8.0  | 14.7 | 8.4  |
| 05030104 | Beaver                         | Ohio River   | 225,203   | 114,840   | 432,853    | 718.15   | 366.21   | 1,380.32 | 41.6 | 36.3 | 5.1  | 6.3  | 10.6 |
| 05030105 | Connoquenessing                | Ohio River   | 4,612,417 | 2,117,796 | 8,783,811  | 2,126.79 | 976.52   | 4,050.23 | 16.7 | 70.7 | 4.2  | 3.9  | 4.5  |
| 05030106 | Upper Ohio-Wheeling            | Ohio River   | 2,332,305 | 1,242,264 | 4,304,878  | 594.25   | 316.52   | 1,096.85 | 61.2 | 18.3 | 5.1  | 6.1  | 9.2  |
| 05030201 | Little Muskingum-Middle Island | Ohio River   | 2,703,089 | 1,408,023 | 5,615,481  | 578.77   | 301.48   | 1,202.36 | 68.6 | 19.1 | 3.0  | 5.2  | 4.1  |
| 05030202 | Upper Ohio-Shade               | Ohio River   | 4,022,889 | 1,831,311 | 6,867,983  | 1,113.65 | 506.96   | 1,901.25 | 32.2 | 57.0 | 1.8  | 6.0  | 3.0  |
| 05030203 | Little Kanawha                 | Ohio River   | 2,617,430 | 1,375,060 | 3,965,352  | 438.19   | 230.20   | 663.85   | 92.1 | 1.4  | 2.3  | 3.6  | 0.6  |
| 05030204 | Hocking                        | Ohio River   | 2,300,749 | 1,006,137 | 3,884,368  | 738.96   | 323.15   | 1,247.58 | 48.7 | 9.9  | 12.0 | 23.2 | 6.1  |

|          |                       |            |            |            |            |          |          |          |      |      |      |      |      |
|----------|-----------------------|------------|------------|------------|------------|----------|----------|----------|------|------|------|------|------|
| 05040001 | Tuscarawas            | Ohio River | 6,463,652  | 3,048,709  | 12,849,525 | 961.34   | 453.43   | 1,911.11 | 27.9 | 12.5 | 11.9 | 20.7 | 27.1 |
| 05040002 | Mohican               | Ohio River | 3,275,973  | 1,650,561  | 5,317,052  | 1,271.07 | 640.42   | 2,063.01 | 22.9 | 13.5 | 15.7 | 27.7 | 20.1 |
| 05040003 | Walhonding            | Ohio River | 3,787,188  | 2,043,438  | 5,665,537  | 1,178.56 | 635.91   | 1,763.10 | 24.9 | 2.8  | 14.4 | 27.0 | 30.9 |
| 05040004 | Muskingum             | Ohio River | 2,710,571  | 1,178,574  | 4,323,993  | 664.00   | 288.71   | 1,059.23 | 51.0 | 2.9  | 8.5  | 24.5 | 13.0 |
| 05040005 | Wills                 | Ohio River | 1,101,397  | 584,042    | 2,036,581  | 498.96   | 264.58   | 922.62   | 59.0 | 5.9  | 10.2 | 13.9 | 11.0 |
| 05040006 | Licking               | Ohio River | 2,429,921  | 1,237,823  | 4,682,567  | 1,203.26 | 612.95   | 2,318.73 | 29.8 | 8.2  | 18.3 | 28.7 | 14.9 |
| 05050001 | Upper New             | Ohio River | 4,198,165  | 2,280,846  | 8,636,687  | 549.16   | 298.36   | 1,129.76 | 51.1 | 5.7  | 0.7  | 26.3 | 16.2 |
| 05050002 | Middle New            | Ohio River | 4,088,147  | 1,918,692  | 6,874,688  | 972.08   | 456.23   | 1,634.66 | 22.6 | 69.2 | 0.4  | 5.0  | 2.8  |
| 05050003 | Greenbrier            | Ohio River | 1,791,574  | 788,944    | 2,747,886  | 416.15   | 183.26   | 638.28   | 78.4 | 2.5  | 2.0  | 9.9  | 7.2  |
| 05050004 | Lower New             | Ohio River | 827,786    | 489,337    | 1,177,984  | 459.92   | 271.88   | 654.50   | 75.3 | 20.2 | 0.6  | 3.5  | 0.3  |
| 05050005 | Gauley                | Ohio River | 2,050,248  | 972,612    | 3,487,562  | 551.05   | 261.41   | 937.37   | 93.1 | 2.0  | 1.8  | 2.1  | 1.0  |
| 05050006 | Upper Kanawha         | Ohio River | 721,538    | 418,643    | 1,275,572  | 536.20   | 311.11   | 947.92   | 61.6 | 37.7 | 0.2  | 0.5  | 0.0  |
| 05050007 | Elk                   | Ohio River | 1,935,838  | 824,538    | 3,406,674  | 489.73   | 208.59   | 861.82   | 96.0 | 1.8  | 1.1  | 1.0  | 0.1  |
| 05050008 | Lower Kanawha         | Ohio River | 1,368,680  | 664,049    | 2,588,637  | 614.18   | 297.98   | 1,161.62 | 57.7 | 33.5 | 2.6  | 4.5  | 1.7  |
| 05050009 | Coal                  | Ohio River | 861,821    | 406,984    | 1,543,014  | 374.68   | 176.94   | 670.83   | 96.6 | 1.8  | 0.7  | 0.9  | 0.1  |
| 05060001 | Upper Scioto          | Ohio River | 24,660,303 | 13,394,785 | 39,027,319 | 2,924.39 | 1,588.45 | 4,628.14 | 19.8 | 15.9 | 20.9 | 36.2 | 7.1  |
| 05060002 | Lower Scioto          | Ohio River | 6,121,722  | 3,140,405  | 9,776,703  | 1,091.54 | 559.95   | 1,743.25 | 32.7 | 6.3  | 18.8 | 37.6 | 4.6  |
| 05060003 | Paint                 | Ohio River | 6,809,943  | 2,965,766  | 10,125,935 | 2,303.48 | 1,003.18 | 3,425.12 | 22.1 | 1.9  | 25.1 | 47.0 | 3.8  |
| 05070101 | Upper Guyandotte      | Ohio River | 837,148    | 375,936    | 1,495,070  | 344.93   | 154.89   | 616.01   | 94.7 | 4.5  | 0.2  | 0.4  | 0.1  |
| 05070102 | Lower Guyandotte      | Ohio River | 885,372    | 436,599    | 1,590,702  | 436.18   | 215.09   | 783.67   | 85.4 | 10.1 | 1.7  | 2.5  | 0.3  |
| 05070201 | Tug                   | Ohio River | 1,272,812  | 612,302    | 2,098,577  | 315.68   | 151.86   | 520.48   | 94.8 | 3.7  | 0.7  | 0.5  | 0.3  |
| 05070202 | Upper Levisa          | Ohio River | 879,752    | 471,476    | 1,614,696  | 280.08   | 150.10   | 514.05   | 95.0 | 3.0  | 0.2  | 1.5  | 0.4  |
| 05070203 | Lower Levisa          | Ohio River | 932,377    | 453,549    | 1,875,794  | 323.62   | 157.42   | 651.07   | 90.1 | 6.9  | 0.5  | 2.4  | 0.2  |
| 05070204 | Big Sandy             | Ohio River | 465,834    | 218,323    | 884,281    | 437.26   | 204.93   | 830.04   | 84.1 | 10.4 | 0.4  | 4.0  | 1.1  |
| 05080001 | Upper Great Miami     | Ohio River | 14,601,517 | 7,893,476  | 26,049,254 | 2,289.36 | 1,237.61 | 4,084.24 | 16.9 | 6.2  | 19.9 | 34.6 | 22.4 |
| 05080002 | Lower Great Miami     | Ohio River | 8,793,246  | 3,718,257  | 13,236,699 | 2,473.84 | 1,046.07 | 3,723.94 | 18.5 | 27.6 | 15.1 | 28.9 | 10.0 |
| 05080003 | Whitewater            | Ohio River | 7,567,155  | 3,976,509  | 11,169,785 | 1,971.56 | 1,036.05 | 2,910.19 | 23.9 | 3.8  | 21.1 | 40.2 | 11.1 |
| 05090101 | Raccoon-Symmes        | Ohio River | 2,227,059  | 1,094,158  | 3,446,901  | 570.86   | 280.46   | 883.54   | 63.1 | 15.0 | 5.4  | 11.4 | 5.2  |
| 05090102 | Twelvepole            | Ohio River | 420,593    | 218,957    | 688,467    | 371.04   | 193.16   | 607.35   | 96.5 | 0.8  | 0.8  | 1.4  | 0.4  |
| 05090103 | Little Scioto-Tygarts | Ohio River | 2,149,238  | 1,063,902  | 3,363,211  | 825.61   | 408.69   | 1,291.95 | 46.5 | 35.9 | 2.8  | 11.5 | 3.4  |
| 05090104 | Little Sandy          | Ohio River | 967,419    | 432,523    | 1,476,548  | 518.36   | 231.76   | 791.17   | 80.8 | 2.2  | 0.8  | 13.4 | 2.8  |
| 05090201 | Ohio Brush-Whiteoak   | Ohio River | 5,170,571  | 2,425,181  | 9,124,300  | 952.69   | 446.85   | 1,681.17 | 45.9 | 2.5  | 10.7 | 34.2 | 6.7  |
| 05090202 | Little Miami          | Ohio River | 8,016,858  | 4,064,813  | 14,527,726 | 1,749.05 | 886.83   | 3,169.54 | 24.3 | 13.9 | 19.6 | 38.0 | 4.2  |
| 05090203 | Middle Ohio-Laughery  | Ohio River | 7,145,697  | 3,634,847  | 11,286,198 | 1,962.19 | 998.12   | 3,099.16 | 22.4 | 60.6 | 4.5  | 9.8  | 2.8  |
| 05100101 | Licking               | Ohio River | 5,496,385  | 2,724,320  | 9,405,312  | 763.56   | 378.46   | 1,306.59 | 62.3 | 2.6  | 2.1  | 21.6 | 11.3 |
| 05100102 | South Fork Licking    | Ohio River | 2,617,492  | 1,367,332  | 4,460,123  | 1,087.78 | 568.24   | 1,853.54 | 47.5 | 4.1  | 2.9  | 32.9 | 12.6 |
| 05100201 | North Fork Kentucky   | Ohio River | 1,212,726  | 541,515    | 2,058,841  | 351.29   | 156.86   | 596.39   | 92.8 | 4.2  | 0.1  | 2.5  | 0.3  |
| 05100202 | Middle Fork Kentucky  | Ohio River | 493,218    | 252,899    | 843,469    | 339.42   | 174.04   | 580.46   | 97.3 | 0.4  | 0.3  | 1.7  | 0.3  |
| 05100203 | South Fork Kentucky   | Ohio River | 781,869    | 377,936    | 1,322,689  | 403.58   | 195.08   | 682.74   | 89.7 | 2.2  | 0.2  | 7.1  | 0.9  |
| 05100204 | Upper Kentucky        | Ohio River | 1,693,937  | 893,500    | 2,812,525  | 603.28   | 318.21   | 1,001.66 | 78.3 | 2.3  | 0.7  | 15.4 | 3.4  |
| 05100205 | Lower Kentucky        | Ohio River | 8,692,647  | 4,116,210  | 17,228,151 | 1,038.46 | 491.74   | 2,058.14 | 44.6 | 13.1 | 2.3  | 29.4 | 10.6 |
| 05110001 | Upper Green           | Ohio River | 10,008,072 | 5,104,055  | 18,721,247 | 1,231.46 | 628.04   | 2,303.59 | 36.9 | 2.0  | 5.3  | 37.3 | 18.4 |
| 05110002 | Barren                | Ohio River | 7,655,307  | 4,039,470  | 16,317,748 | 1,308.58 | 690.50   | 2,789.31 | 30.8 | 3.0  | 7.7  | 39.8 | 18.8 |
| 05110003 | Middle Green          | Ohio River | 2,672,245  | 1,310,105  | 3,897,604  | 1,006.10 | 493.26   | 1,467.45 | 35.9 | 2.6  | 10.5 | 32.7 | 18.3 |
| 05110004 | Rough                 | Ohio River | 2,691,662  | 1,252,031  | 4,321,749  | 957.11   | 445.20   | 1,536.75 | 38.2 | 1.0  | 9.5  | 31.3 | 20.1 |
| 05110005 | Lower Green           | Ohio River | 4,097,362  | 2,247,067  | 7,192,296  | 1,749.90 | 959.68   | 3,071.69 | 21.0 | 1.9  | 20.9 | 38.8 | 17.4 |
| 05110006 | Pond                  | Ohio River | 2,626,283  | 1,447,168  | 6,000,405  | 1,280.42 | 705.55   | 2,925.44 | 26.2 | 1.6  | 17.3 | 32.4 | 22.5 |
| 05120101 | Upper Wabash          | Ohio River | 18,202,145 | 10,230,276 | 31,235,474 | 4,323.93 | 2,430.21 | 7,420.00 | 16.4 | 2.2  | 21.7 | 36.4 | 23.3 |
| 05120102 | Salamonie             | Ohio River | 5,010,804  | 2,596,089  | 9,753,547  | 3,516.43 | 1,821.85 | 6,844.74 | 18.2 | 0.6  | 25.0 | 37.2 | 18.9 |

|          |                                   |               |            |           |            |          |          |          |      |      |      |      |      |
|----------|-----------------------------------|---------------|------------|-----------|------------|----------|----------|----------|------|------|------|------|------|
| 05120103 | Mississinewa                      | Ohio River    | 8,553,821  | 4,209,172 | 17,909,616 | 4,131.18 | 2,032.88 | 8,649.69 | 18.9 | 3.3  | 25.0 | 38.5 | 14.3 |
| 05120104 | Eel                               | Ohio River    | 5,762,763  | 2,360,631 | 9,030,795  | 2,737.08 | 1,121.21 | 4,289.27 | 19.4 | 3.1  | 25.3 | 37.5 | 14.7 |
| 05120105 | Middle Wabash-Deer                | Ohio River    | 6,119,428  | 2,967,898 | 10,443,651 | 3,563.09 | 1,728.08 | 6,080.91 | 15.4 | 0.5  | 23.2 | 40.0 | 20.9 |
| 05120106 | Tipppecanoe                       | Ohio River    | 11,600,734 | 6,160,389 | 19,208,853 | 2,250.65 | 1,195.17 | 3,726.70 | 18.1 | 1.6  | 25.5 | 43.2 | 11.6 |
| 05120107 | Wildcat                           | Ohio River    | 8,465,134  | 4,234,693 | 13,460,649 | 3,900.70 | 1,951.33 | 6,202.61 | 15.6 | 3.1  | 23.3 | 41.0 | 16.9 |
| 05120108 | Middle Wabash-Little Vermilion    | Ohio River    | 11,966,107 | 5,813,175 | 20,773,688 | 2,044.24 | 993.10   | 3,548.89 | 20.2 | 5.0  | 26.7 | 42.5 | 5.7  |
| 05120109 | Vermilion                         | Ohio River    | 8,729,164  | 4,719,820 | 13,896,983 | 2,364.22 | 1,278.32 | 3,763.88 | 17.6 | 5.8  | 27.9 | 46.7 | 2.0  |
| 05120110 | Sugar                             | Ohio River    | 5,640,723  | 2,814,300 | 10,448,876 | 2,763.76 | 1,378.91 | 5,119.59 | 17.7 | 1.2  | 25.9 | 42.7 | 12.5 |
| 05120111 | Middle Wabash-Busseron            | Ohio River    | 9,291,888  | 5,018,387 | 17,516,378 | 1,774.69 | 958.48   | 3,345.51 | 22.2 | 9.2  | 24.0 | 40.6 | 3.9  |
| 05120112 | Embarras                          | Ohio River    | 12,820,933 | 6,867,402 | 21,788,133 | 2,009.06 | 1,076.13 | 3,414.23 | 19.6 | 1.3  | 27.0 | 45.0 | 7.0  |
| 05120113 | Lower Wabash                      | Ohio River    | 6,768,940  | 3,142,324 | 12,651,648 | 1,917.22 | 890.03   | 3,583.43 | 21.2 | 0.9  | 24.9 | 47.6 | 5.4  |
| 05120114 | Little Wabash                     | Ohio River    | 8,846,040  | 4,508,090 | 13,336,241 | 1,603.79 | 817.32   | 2,417.87 | 22.1 | 1.7  | 23.5 | 41.6 | 11.1 |
| 05120115 | Skillet                           | Ohio River    | 3,330,344  | 1,710,588 | 6,343,973  | 1,203.59 | 618.21   | 2,292.73 | 27.3 | 0.3  | 24.3 | 42.0 | 6.2  |
| 05120201 | Upper White                       | Ohio River    | 19,842,956 | 9,665,965 | 36,286,879 | 2,798.64 | 1,363.28 | 5,117.88 | 18.3 | 25.8 | 20.2 | 31.1 | 4.7  |
| 05120202 | Lower White                       | Ohio River    | 6,959,915  | 4,250,779 | 14,987,105 | 1,661.83 | 1,014.96 | 3,578.49 | 25.4 | 7.8  | 18.1 | 33.2 | 15.5 |
| 05120203 | Eel                               | Ohio River    | 5,071,831  | 2,529,204 | 9,627,193  | 1,622.13 | 808.92   | 3,079.09 | 26.0 | 2.5  | 25.2 | 39.3 | 7.0  |
| 05120204 | Driftwood                         | Ohio River    | 8,791,500  | 4,606,803 | 17,060,026 | 2,890.21 | 1,514.49 | 5,608.49 | 20.6 | 3.9  | 26.9 | 40.1 | 8.4  |
| 05120205 | Flatrock-Haw                      | Ohio River    | 4,416,572  | 2,284,759 | 7,069,712  | 3,234.23 | 1,673.12 | 5,177.11 | 18.9 | 0.7  | 27.7 | 41.5 | 11.1 |
| 05120206 | Upper East Fork White             | Ohio River    | 5,550,486  | 2,255,073 | 10,057,294 | 2,450.23 | 995.49   | 4,439.74 | 19.3 | 4.2  | 22.3 | 38.0 | 16.1 |
| 05120207 | Muscatatuck                       | Ohio River    | 3,835,750  | 1,915,123 | 5,461,082  | 1,296.47 | 647.31   | 1,845.83 | 30.1 | 2.4  | 20.1 | 37.9 | 9.5  |
| 05120208 | Lower East Fork White             | Ohio River    | 5,479,437  | 2,871,799 | 9,105,099  | 1,038.43 | 544.24   | 1,725.54 | 39.1 | 5.6  | 13.4 | 25.2 | 16.6 |
| 05120209 | Patoka                            | Ohio River    | 3,612,543  | 1,684,766 | 6,685,839  | 1,614.77 | 753.07   | 2,988.50 | 23.2 | 7.2  | 14.9 | 28.9 | 25.8 |
| 05130101 | Upper Cumberland                  | Cumberland    | 2,891,409  | 1,656,264 | 5,784,358  | 479.04   | 274.40   | 958.33   | 81.8 | 8.6  | 0.1  | 7.6  | 1.8  |
| 05130102 | Rockcastle                        | Cumberland    | 1,158,783  | 568,635   | 1,955,658  | 586.03   | 287.58   | 989.04   | 73.1 | 0.6  | 0.1  | 19.2 | 7.0  |
| 05130103 | Upper Cumberland-Lake Cumberland  | Cumberland    | 4,595,256  | 2,543,824 | 7,704,048  | 943.55   | 522.33   | 1,581.88 | 46.7 | 1.4  | 3.6  | 32.9 | 15.4 |
| 05130104 | South Fork Cumberland             | Cumberland    | 2,276,855  | 1,067,953 | 3,928,226  | 634.84   | 297.77   | 1,095.28 | 76.2 | 1.1  | 0.1  | 7.8  | 14.7 |
| 05130105 | Obey                              | Cumberland    | 1,414,120  | 679,392   | 2,449,980  | 576.17   | 276.81   | 998.22   | 55.2 | 1.9  | 6.2  | 18.0 | 18.7 |
| 05130106 | Upper Cumberland-Cordell Hull     | Cumberland    | 1,751,786  | 834,333   | 2,764,627  | 847.08   | 403.44   | 1,336.84 | 59.8 | 1.7  | 12.0 | 18.0 | 8.5  |
| 05130107 | Collins                           | Cumberland    | 3,188,557  | 1,367,359 | 5,315,834  | 1,556.55 | 667.50   | 2,595.01 | 46.3 | 1.1  | 7.5  | 27.1 | 18.1 |
| 05130108 | Caney                             | Cumberland    | 4,410,150  | 2,369,863 | 9,185,919  | 951.98   | 511.56   | 1,982.88 | 56.0 | 3.4  | 6.5  | 22.7 | 11.4 |
| 05130201 | Lower Cumberland-Old Hickory Lake | Cumberland    | 2,295,640  | 1,067,044 | 4,242,092  | 895.98   | 416.46   | 1,655.67 | 56.8 | 6.9  | 4.8  | 21.1 | 10.5 |
| 05130202 | Lower Cumberland-Sycamore         | Cumberland    | 3,650,635  | 1,853,460 | 6,730,649  | 2,170.92 | 1,102.19 | 4,002.50 | 18.7 | 75.5 | 0.9  | 3.8  | 1.2  |
| 05130203 | Stones                            | Cumberland    | 1,822,036  | 887,599   | 3,617,458  | 760.37   | 370.41   | 1,509.63 | 63.5 | 4.2  | 5.5  | 15.8 | 11.0 |
| 05130204 | Harpeth                           | Cumberland    | 1,725,057  | 819,686   | 2,431,601  | 768.88   | 365.34   | 1,083.79 | 62.3 | 5.9  | 3.7  | 18.2 | 9.9  |
| 05130205 | Lower Cumberland                  | Cumberland    | 5,128,629  | 2,819,105 | 7,818,734  | 845.64   | 464.83   | 1,289.21 | 35.7 | 2.8  | 15.8 | 38.1 | 7.6  |
| 05130206 | Red                               | Cumberland    | 6,878,592  | 3,391,812 | 13,431,457 | 1,827.78 | 901.27   | 3,569.01 | 19.9 | 4.4  | 21.6 | 43.4 | 10.6 |
| 05140101 | Silver-Little Kentucky            | Ohio River    | 5,313,050  | 2,678,767 | 8,616,441  | 1,618.80 | 816.17   | 2,625.28 | 25.0 | 54.2 | 5.3  | 12.5 | 2.9  |
| 05140102 | Salt                              | Ohio River    | 4,792,570  | 2,159,649 | 8,639,544  | 1,243.05 | 560.15   | 2,240.84 | 35.7 | 20.4 | 5.2  | 25.1 | 13.6 |
| 05140103 | Rolling Fork                      | Ohio River    | 4,455,453  | 2,074,106 | 7,949,349  | 1,187.61 | 552.86   | 2,118.91 | 41.1 | 3.4  | 5.9  | 32.6 | 16.9 |
| 05140104 | Blue-Sinking                      | Ohio River    | 4,750,680  | 1,910,484 | 7,216,515  | 973.04   | 391.31   | 1,478.09 | 43.2 | 1.3  | 9.5  | 33.7 | 12.3 |
| 05140201 | Lower Ohio-Little Pigeon          | Ohio River    | 4,816,030  | 1,916,535 | 8,775,912  | 1,316.66 | 523.96   | 2,399.26 | 30.8 | 9.5  | 17.7 | 31.2 | 10.7 |
| 05140202 | Highland-Pigeon                   | Ohio River    | 5,728,707  | 2,790,410 | 10,698,021 | 2,210.28 | 1,076.61 | 4,127.56 | 18.3 | 28.2 | 19.5 | 30.8 | 3.2  |
| 05140203 | Lower Ohio-Bay                    | Ohio River    | 2,261,892  | 915,042   | 4,332,109  | 806.40   | 326.23   | 1,544.47 | 47.0 | 1.2  | 17.3 | 29.3 | 5.2  |
| 05140204 | Saline                            | Ohio River    | 3,660,641  | 1,733,217 | 6,733,979  | 1,208.18 | 572.04   | 2,222.52 | 30.7 | 2.0  | 21.7 | 41.1 | 4.5  |
| 05140205 | Tradewater                        | Ohio River    | 2,335,754  | 1,265,657 | 4,183,322  | 958.43   | 519.34   | 1,716.54 | 30.4 | 4.1  | 18.7 | 33.6 | 13.2 |
| 05140206 | Lower Ohio                        | Lower Ohio    | 2,903,158  | 1,513,616 | 4,755,142  | 1,093.58 | 570.16   | 1,791.20 | 33.5 | 8.2  | 18.2 | 30.9 | 9.2  |
| 07010101 | Mississippi Headwaters            | Upper Miss. R | 178,665    | 85,032    | 312,401    | 37.73    | 17.96    | 65.98    | 89.6 | 0.8  | 2.1  | 4.3  | 3.3  |
| 07010102 | Leech Lake                        | Upper Miss. R | 79,338     | 31,977    | 130,230    | 24.32    | 9.80     | 39.93    | 91.0 | 0.2  | 1.7  | 3.8  | 3.3  |
| 07010103 | Prairie-Willow                    | Upper Miss. R | 938,931    | 447,996   | 1,332,296  | 158.34   | 75.55    | 224.68   | 70.1 | 21.4 | 2.1  | 3.5  | 2.9  |

|          |                        |               |           |           |            |          |          |          |      |      |      |      |      |
|----------|------------------------|---------------|-----------|-----------|------------|----------|----------|----------|------|------|------|------|------|
| 07010104 | Elk-Nokasippi          | Upper Miss. R | 1,484,605 | 652,415   | 2,315,370  | 318.66   | 140.04   | 496.97   | 43.2 | 5.1  | 10.0 | 15.6 | 26.0 |
| 07010105 | Pine                   | Upper Miss. R | 88,269    | 43,733    | 160,484    | 44.43    | 22.01    | 80.79    | 90.9 | 0.4  | 2.1  | 3.0  | 3.6  |
| 07010106 | Crow Wing              | Upper Miss. R | 908,438   | 419,466   | 1,570,647  | 180.78   | 83.47    | 312.56   | 50.2 | 2.0  | 13.3 | 19.3 | 15.1 |
| 07010107 | Redeye                 | Upper Miss. R | 804,105   | 407,742   | 1,336,834  | 385.64   | 195.55   | 641.13   | 29.2 | 1.9  | 17.2 | 27.6 | 24.0 |
| 07010108 | Long Prairie           | Upper Miss. R | 740,254   | 362,033   | 1,226,579  | 294.49   | 144.03   | 487.96   | 29.9 | 4.5  | 18.7 | 20.7 | 26.2 |
| 07010201 | Platte-Spunk           | Upper Miss. R | 1,755,340 | 860,733   | 2,954,622  | 684.99   | 335.89   | 1,152.99 | 19.2 | 2.4  | 12.3 | 23.9 | 42.3 |
| 07010202 | Sauk                   | Upper Miss. R | 2,063,406 | 936,801   | 3,377,488  | 805.50   | 365.70   | 1,318.49 | 15.4 | 3.9  | 17.1 | 24.3 | 39.3 |
| 07010203 | Clearwater-Elk         | Upper Miss. R | 1,716,895 | 879,545   | 3,509,134  | 600.38   | 307.57   | 1,227.10 | 19.7 | 21.2 | 15.8 | 23.2 | 20.1 |
| 07010204 | Crow                   | Upper Miss. R | 2,989,831 | 1,276,260 | 5,217,322  | 780.39   | 333.12   | 1,361.80 | 20.4 | 3.3  | 22.0 | 30.1 | 24.2 |
| 07010205 | South Fork Crow        | Upper Miss. R | 5,789,970 | 2,377,504 | 9,739,083  | 1,761.69 | 723.39   | 2,963.27 | 17.6 | 2.4  | 23.6 | 37.7 | 18.7 |
| 07010206 | Twin Cities            | Upper Miss. R | 4,541,305 | 2,160,843 | 6,382,835  | 1,945.36 | 925.64   | 2,734.22 | 8.7  | 85.8 | 1.5  | 2.9  | 1.2  |
| 07010207 | Rum                    | Upper Miss. R | 1,657,220 | 840,212   | 2,396,364  | 397.86   | 201.71   | 575.31   | 37.9 | 5.9  | 17.7 | 22.0 | 16.5 |
| 07020001 | Upper Minnesota        | Upper Miss. R | 894,153   | 400,894   | 1,517,902  | 166.24   | 74.53    | 282.20   | 25.7 | 0.7  | 27.0 | 35.7 | 10.9 |
| 07020002 | Pomme De Terre         | Upper Miss. R | 1,649,269 | 774,850   | 2,645,903  | 693.80   | 325.95   | 1,113.05 | 18.7 | 1.3  | 27.4 | 37.4 | 15.2 |
| 07020003 | Lac Qui Parle          | Upper Miss. R | 2,044,003 | 848,758   | 3,940,421  | 702.37   | 291.65   | 1,354.02 | 21.4 | 5.5  | 27.7 | 33.2 | 12.2 |
| 07020004 | Hawk-Yellow Medicine   | Upper Miss. R | 6,878,621 | 3,320,612 | 13,812,556 | 1,331.73 | 642.89   | 2,674.18 | 18.4 | 1.8  | 25.5 | 36.6 | 17.7 |
| 07020005 | Chippewa               | Upper Miss. R | 3,875,477 | 2,140,612 | 5,720,489  | 720.13   | 397.76   | 1,062.96 | 20.3 | 1.0  | 27.9 | 36.2 | 14.6 |
| 07020006 | Redwood                | Upper Miss. R | 1,963,746 | 827,802   | 3,880,524  | 1,040.27 | 438.52   | 2,055.67 | 18.6 | 4.2  | 24.9 | 32.3 | 20.1 |
| 07020007 | Middle Minnesota       | Upper Miss. R | 8,276,777 | 3,384,525 | 13,100,387 | 2,281.05 | 932.76   | 3,610.42 | 16.3 | 3.3  | 21.4 | 33.9 | 25.0 |
| 07020008 | Cottonwood             | Upper Miss. R | 5,323,437 | 3,128,613 | 8,984,438  | 1,643.37 | 965.81   | 2,773.53 | 17.0 | 1.2  | 24.4 | 34.7 | 22.6 |
| 07020009 | Blue Earth             | Upper Miss. R | 9,823,085 | 4,912,717 | 16,440,576 | 2,491.35 | 1,245.97 | 4,169.70 | 14.8 | 1.3  | 21.5 | 36.3 | 26.2 |
| 07020010 | Watonwan               | Upper Miss. R | 4,180,988 | 2,370,847 | 7,533,213  | 1,823.90 | 1,034.25 | 3,286.25 | 15.8 | 1.1  | 23.4 | 35.7 | 24.0 |
| 07020011 | Le Sueur               | Upper Miss. R | 7,058,298 | 3,096,430 | 12,885,627 | 2,438.53 | 1,069.77 | 4,451.78 | 16.7 | 0.7  | 24.3 | 36.5 | 21.7 |
| 07020012 | Lower Minnesota        | Upper Miss. R | 9,049,993 | 4,016,152 | 15,357,911 | 1,785.53 | 792.37   | 3,030.06 | 17.0 | 14.2 | 18.8 | 31.0 | 19.0 |
| 07030001 | Upper St. Croix        | Upper Miss. R | 1,271,528 | 653,594   | 2,336,371  | 237.90   | 122.29   | 437.14   | 78.1 | 0.8  | 4.1  | 7.3  | 9.7  |
| 07030002 | Namekagon              | Upper Miss. R | 538,401   | 247,960   | 860,711    | 203.28   | 93.62    | 324.98   | 87.7 | 0.0  | 2.7  | 4.0  | 5.6  |
| 07030003 | Kettle                 | Upper Miss. R | 747,900   | 346,047   | 1,611,936  | 271.33   | 125.54   | 584.78   | 69.1 | 5.4  | 2.9  | 9.3  | 13.3 |
| 07030004 | Snake                  | Upper Miss. R | 921,110   | 495,598   | 1,565,604  | 360.79   | 194.12   | 613.23   | 49.5 | 2.4  | 9.6  | 21.3 | 17.2 |
| 07030005 | Lower St. Croix        | Upper Miss. R | 3,654,605 | 1,859,685 | 5,208,245  | 546.88   | 278.28   | 779.36   | 35.8 | 5.2  | 15.5 | 21.0 | 22.4 |
| 07040001 | Rush-Vermillion        | Upper Miss. R | 2,803,287 | 1,323,691 | 4,471,686  | 968.92   | 457.52   | 1,545.58 | 23.4 | 8.4  | 19.3 | 25.6 | 23.3 |
| 07040002 | Cannon                 | Upper Miss. R | 6,203,191 | 3,130,441 | 10,955,128 | 1,622.19 | 818.64   | 2,864.86 | 18.3 | 2.1  | 20.6 | 35.9 | 23.0 |
| 07040003 | Buffalo-Whitewater     | Upper Miss. R | 3,239,390 | 1,529,545 | 5,288,097  | 935.89   | 441.90   | 1,527.79 | 24.8 | 3.9  | 13.6 | 22.0 | 35.7 |
| 07040004 | Zumbro                 | Upper Miss. R | 5,622,571 | 2,717,691 | 10,119,074 | 1,507.73 | 728.77   | 2,713.49 | 17.8 | 6.1  | 18.1 | 32.2 | 25.8 |
| 07040005 | Trempealeau            | Upper Miss. R | 1,768,575 | 799,820   | 3,327,826  | 931.89   | 421.44   | 1,753.49 | 25.3 | 2.2  | 16.9 | 17.4 | 38.2 |
| 07040006 | La Crosse-Pine         | Upper Miss. R | 1,370,616 | 702,253   | 2,388,193  | 805.27   | 412.59   | 1,403.12 | 30.3 | 16.4 | 11.5 | 14.4 | 27.5 |
| 07040007 | Black                  | Upper Miss. R | 4,083,755 | 2,217,549 | 7,847,187  | 697.42   | 378.71   | 1,340.13 | 29.5 | 1.9  | 20.5 | 13.7 | 34.5 |
| 07040008 | Root                   | Upper Miss. R | 5,777,620 | 2,861,047 | 10,689,371 | 1,332.18 | 659.69   | 2,464.71 | 21.7 | 1.0  | 16.2 | 34.2 | 26.8 |
| 07050001 | Upper Chippewa         | Upper Miss. R | 1,268,233 | 688,463   | 1,937,259  | 253.45   | 137.59   | 387.15   | 73.0 | 0.4  | 8.3  | 4.7  | 13.6 |
| 07050002 | Flambeau               | Upper Miss. R | 513,585   | 251,255   | 1,066,280  | 169.89   | 83.11    | 352.72   | 73.7 | 9.4  | 6.1  | 2.6  | 8.2  |
| 07050003 | South Fork Flambeau    | Upper Miss. R | 351,099   | 186,387   | 523,598    | 182.77   | 97.03    | 272.57   | 80.6 | 1.4  | 7.0  | 2.8  | 8.3  |
| 07050004 | Jump                   | Upper Miss. R | 764,555   | 440,168   | 1,332,923  | 351.08   | 202.13   | 612.08   | 55.7 | 0.8  | 14.4 | 7.1  | 22.0 |
| 07050005 | Lower Chippewa         | Upper Miss. R | 3,687,043 | 1,721,416 | 7,035,030  | 691.45   | 322.82   | 1,319.31 | 27.3 | 5.0  | 21.3 | 16.2 | 30.3 |
| 07050006 | Eau Claire             | Upper Miss. R | 1,476,897 | 777,233   | 2,690,259  | 627.64   | 330.30   | 1,143.29 | 29.8 | 1.4  | 21.7 | 14.4 | 32.6 |
| 07050007 | Red Cedar              | Upper Miss. R | 2,738,080 | 1,461,279 | 3,870,945  | 564.02   | 301.01   | 797.38   | 29.0 | 2.7  | 16.3 | 18.4 | 33.5 |
| 07060001 | Coon-Yellow            | Upper Miss. R | 3,471,933 | 1,899,352 | 6,617,948  | 943.55   | 516.18   | 1,798.53 | 29.1 | 1.8  | 14.4 | 24.1 | 30.6 |
| 07060002 | Upper Iowa             | Upper Miss. R | 4,117,194 | 2,039,610 | 6,663,427  | 1,588.25 | 786.80   | 2,570.48 | 19.9 | 0.8  | 15.7 | 37.8 | 25.8 |
| 07060003 | Grant-Little Maquoketa | Upper Miss. R | 3,841,915 | 1,839,892 | 6,267,409  | 1,327.01 | 635.51   | 2,164.79 | 21.7 | 3.1  | 15.6 | 22.5 | 37.0 |
| 07060004 | Turkey                 | Upper Miss. R | 8,119,859 | 4,574,837 | 13,945,016 | 1,850.45 | 1,042.57 | 3,177.96 | 17.9 | 0.5  | 17.2 | 37.3 | 27.1 |
| 07060005 | Apple-Plum             | Upper Miss. R | 4,658,255 | 1,977,784 | 8,233,112  | 1,214.07 | 515.47   | 2,145.78 | 23.2 | 5.0  | 16.5 | 32.6 | 22.6 |



|          |                       |               |            |           |            |          |          |          |      |      |      |      |      |
|----------|-----------------------|---------------|------------|-----------|------------|----------|----------|----------|------|------|------|------|------|
| 07060006 | Maquoketa             | Upper Miss. R | 9,057,444  | 4,884,837 | 15,592,635 | 1,863.99 | 1,005.28 | 3,208.92 | 16.7 | 0.7  | 17.5 | 34.5 | 30.5 |
| 07070001 | Upper Wisconsin       | Upper Miss. R | 681,330    | 348,963   | 1,050,432  | 119.74   | 61.33    | 184.61   | 76.0 | 13.8 | 3.9  | 3.6  | 2.7  |
| 07070002 | Lake Dubay            | Upper Miss. R | 4,489,887  | 2,120,412 | 8,386,502  | 638.69   | 301.63   | 1,192.98 | 27.1 | 6.0  | 22.1 | 13.9 | 30.9 |
| 07070003 | Castle Rock           | Upper Miss. R | 14,843,050 | 8,077,187 | 25,483,435 | 1,735.13 | 944.21   | 2,978.98 | 9.2  | 71.6 | 5.9  | 7.1  | 6.2  |
| 07070004 | Baraboo               | Upper Miss. R | 1,693,683  | 925,593   | 3,122,424  | 1,003.96 | 548.66   | 1,850.86 | 24.8 | 3.1  | 19.9 | 18.4 | 33.8 |
| 07070005 | Lower Wisconsin       | Upper Miss. R | 4,978,846  | 2,739,689 | 9,011,932  | 816.99   | 449.56   | 1,478.79 | 31.7 | 1.6  | 17.7 | 18.5 | 30.5 |
| 07070006 | Kickapoo              | Upper Miss. R | 1,753,525  | 795,296   | 3,297,234  | 875.58   | 397.11   | 1,646.39 | 32.4 | 0.5  | 18.3 | 15.2 | 33.6 |
| 07080101 | Copperas-Duck         | Upper Miss. R | 5,217,816  | 2,257,732 | 8,091,850  | 2,023.97 | 875.77   | 3,138.80 | 14.3 | 37.1 | 13.4 | 27.6 | 7.6  |
| 07080102 | Upper Wapsipinicon    | Upper Miss. R | 10,465,919 | 4,308,063 | 15,308,742 | 2,583.28 | 1,063.35 | 3,778.62 | 17.2 | 0.8  | 22.2 | 38.3 | 21.4 |
| 07080103 | Lower Wapsipinicon    | Upper Miss. R | 5,888,791  | 3,376,037 | 10,127,518 | 2,315.51 | 1,327.48 | 3,982.21 | 16.1 | 0.6  | 21.9 | 45.2 | 16.2 |
| 07080104 | Flint-Henderson       | Upper Miss. R | 9,900,613  | 4,867,970 | 20,452,109 | 1,601.42 | 787.39   | 3,308.12 | 18.3 | 4.6  | 23.4 | 43.3 | 10.4 |
| 07080105 | South Skunk           | Upper Miss. R | 9,618,580  | 5,109,884 | 16,521,082 | 2,004.89 | 1,065.10 | 3,443.64 | 18.1 | 1.0  | 22.0 | 39.4 | 19.5 |
| 07080106 | North Skunk           | Upper Miss. R | 3,472,885  | 1,884,705 | 5,953,894  | 1,538.36 | 834.86   | 2,637.36 | 20.6 | 1.0  | 19.9 | 39.4 | 19.1 |
| 07080107 | Skunk                 | Upper Miss. R | 7,120,603  | 3,266,716 | 12,024,071 | 1,664.01 | 763.40   | 2,809.91 | 19.4 | 1.1  | 21.2 | 36.8 | 21.5 |
| 07080201 | Upper Cedar           | Upper Miss. R | 11,948,697 | 6,069,647 | 18,325,000 | 2,741.05 | 1,392.39 | 4,203.79 | 16.4 | 1.5  | 21.9 | 37.5 | 22.8 |
| 07080202 | Shell Rock            | Upper Miss. R | 6,781,951  | 2,789,468 | 10,954,675 | 2,418.83 | 994.88   | 3,907.07 | 17.7 | 1.2  | 24.0 | 40.5 | 16.6 |
| 07080203 | Winnebago             | Upper Miss. R | 4,362,849  | 2,000,424 | 6,585,816  | 2,456.25 | 1,126.23 | 3,707.77 | 18.0 | 2.7  | 23.5 | 42.6 | 13.3 |
| 07080204 | West Fork Cedar       | Upper Miss. R | 5,419,357  | 2,523,177 | 8,467,235  | 2,447.89 | 1,139.70 | 3,824.60 | 16.0 | 0.4  | 22.6 | 38.1 | 22.9 |
| 07080205 | Middle Cedar          | Upper Miss. R | 12,242,433 | 6,608,055 | 18,803,944 | 1,956.67 | 1,056.14 | 3,005.38 | 17.4 | 3.7  | 23.2 | 38.2 | 17.4 |
| 07080206 | Lower Cedar           | Upper Miss. R | 5,264,704  | 2,535,952 | 8,481,080  | 1,872.59 | 902.01   | 3,016.61 | 17.6 | 6.7  | 21.6 | 40.8 | 13.5 |
| 07080207 | Upper Iowa            | Upper Miss. R | 12,932,968 | 6,819,695 | 20,737,994 | 3,415.29 | 1,800.92 | 5,476.42 | 13.5 | 0.5  | 19.2 | 30.1 | 36.7 |
| 07080208 | Middle Iowa           | Upper Miss. R | 5,922,828  | 2,996,221 | 10,610,549 | 1,384.20 | 700.24   | 2,479.76 | 20.7 | 2.2  | 21.6 | 42.2 | 13.4 |
| 07080209 | Lower Iowa            | Upper Miss. R | 8,059,824  | 4,117,389 | 13,324,046 | 1,824.75 | 932.18   | 3,016.58 | 18.1 | 3.1  | 19.7 | 37.1 | 22.1 |
| 07090001 | Upper Rock            | Upper Miss. R | 7,485,987  | 4,110,520 | 14,768,761 | 980.17   | 538.21   | 1,933.73 | 20.2 | 14.6 | 18.9 | 21.6 | 24.7 |
| 07090002 | Crawfish              | Upper Miss. R | 2,450,335  | 1,007,757 | 4,728,342  | 1,197.62 | 492.55   | 2,311.02 | 19.4 | 2.6  | 21.9 | 23.9 | 32.1 |
| 07090003 | Pecatonica            | Upper Miss. R | 7,438,895  | 3,596,265 | 15,028,250 | 1,529.06 | 739.21   | 3,089.05 | 19.5 | 2.5  | 18.8 | 31.9 | 27.4 |
| 07090004 | Sugar                 | Upper Miss. R | 2,571,629  | 1,318,860 | 3,824,298  | 1,320.46 | 677.20   | 1,963.67 | 20.6 | 3.0  | 18.0 | 28.7 | 29.7 |
| 07090005 | Lower Rock            | Upper Miss. R | 9,520,867  | 4,489,613 | 18,566,766 | 1,702.83 | 802.98   | 3,320.71 | 18.0 | 9.1  | 23.1 | 40.0 | 9.8  |
| 07090006 | Kishwaukee            | Upper Miss. R | 6,508,092  | 3,084,800 | 9,771,912  | 1,975.33 | 936.30   | 2,965.97 | 17.5 | 4.6  | 23.2 | 41.0 | 13.7 |
| 07090007 | Green                 | Upper Miss. R | 6,450,222  | 3,294,025 | 10,325,917 | 2,246.14 | 1,147.07 | 3,595.76 | 16.5 | 0.9  | 25.1 | 46.8 | 10.7 |
| 07100001 | Des Moines Headwaters | Upper Miss. R | 3,680,352  | 1,829,257 | 6,418,076  | 1,152.58 | 572.87   | 2,009.95 | 18.6 | 1.5  | 25.5 | 33.8 | 20.6 |
| 07100002 | Upper Des Moines      | Upper Miss. R | 5,528,322  | 2,421,781 | 7,654,277  | 1,952.04 | 855.13   | 2,702.71 | 15.7 | 1.0  | 22.7 | 33.5 | 27.1 |
| 07100003 | East Fork Des Moines  | Upper Miss. R | 7,160,162  | 3,599,895 | 11,685,787 | 2,097.31 | 1,054.46 | 3,422.93 | 15.5 | 0.5  | 23.2 | 39.6 | 21.1 |
| 07100004 | Middle Des Moines     | Upper Miss. R | 9,406,134  | 5,220,943 | 14,498,262 | 2,133.83 | 1,184.40 | 3,289.01 | 18.4 | 0.9  | 24.3 | 43.3 | 13.0 |
| 07100005 | Boone                 | Upper Miss. R | 5,900,104  | 2,838,197 | 9,103,860  | 2,556.48 | 1,229.77 | 3,944.65 | 14.9 | 1.3  | 22.3 | 36.2 | 25.4 |
| 07100006 | North Raccoon         | Upper Miss. R | 17,486,568 | 8,748,447 | 31,299,034 | 2,668.15 | 1,334.86 | 4,775.69 | 16.0 | 0.6  | 23.4 | 39.3 | 20.7 |
| 07100007 | South Raccoon         | Upper Miss. R | 5,746,240  | 2,477,459 | 9,909,712  | 1,958.53 | 844.41   | 3,377.60 | 18.1 | 0.6  | 21.5 | 32.8 | 27.0 |
| 07100008 | Lake Red Rock         | Upper Miss. R | 7,411,914  | 3,138,119 | 13,848,773 | 1,172.25 | 496.32   | 2,190.29 | 26.8 | 11.7 | 18.5 | 32.1 | 10.9 |
| 07100009 | Lower Des Moines      | Upper Miss. R | 6,355,521  | 3,244,562 | 9,572,308  | 1,139.79 | 581.87   | 1,716.68 | 28.8 | 7.4  | 15.0 | 33.8 | 15.1 |
| 07110001 | Bear-Wyaconda         | Upper Miss. R | 5,504,334  | 3,055,031 | 11,270,430 | 1,249.27 | 693.37   | 2,557.96 | 24.5 | 5.9  | 20.4 | 38.3 | 10.8 |
| 07110002 | North Fabius          | Upper Miss. R | 2,225,495  | 1,151,313 | 3,653,730  | 935.98   | 484.21   | 1,536.66 | 34.0 | 0.0  | 17.2 | 38.8 | 9.9  |
| 07110003 | South Fabius          | Upper Miss. R | 1,758,953  | 899,607   | 3,125,048  | 1,081.39 | 553.07   | 1,921.26 | 29.4 | 0.0  | 18.7 | 43.8 | 8.2  |
| 07110004 | The Sny               | Upper Miss. R | 5,042,250  | 2,444,437 | 9,719,675  | 976.97   | 473.63   | 1,883.25 | 26.3 | 1.7  | 19.1 | 41.2 | 11.7 |
| 07110005 | North Fork Salt       | Upper Miss. R | 2,695,394  | 1,305,168 | 5,380,085  | 1,165.96 | 564.58   | 2,327.29 | 28.6 | 0.0  | 21.4 | 38.5 | 11.5 |
| 07110006 | South Fork Salt       | Upper Miss. R | 3,907,996  | 1,796,388 | 7,033,304  | 1,251.04 | 575.06   | 2,251.52 | 25.4 | 2.0  | 20.2 | 41.8 | 10.6 |
| 07110007 | Salt                  | Upper Miss. R | 2,358,800  | 1,305,788 | 3,913,123  | 1,149.10 | 636.12   | 1,906.30 | 25.4 | 0.0  | 21.9 | 44.1 | 8.6  |
| 07110008 | Cuivre                | Upper Miss. R | 3,858,857  | 1,802,109 | 6,167,830  | 1,194.87 | 558.01   | 1,909.83 | 25.8 | 1.5  | 21.0 | 41.0 | 10.8 |
| 07110009 | Peruque-Piasa         | Upper Miss. R | 2,005,686  | 974,460   | 3,388,854  | 1,153.60 | 560.48   | 1,949.15 | 25.3 | 28.2 | 14.4 | 27.5 | 4.6  |
| 07120001 | Kankakee              | Upper Miss. R | 16,726,834 | 6,960,580 | 24,820,337 | 2,131.54 | 887.00   | 3,162.91 | 21.3 | 6.7  | 24.8 | 40.9 | 6.3  |

|          |                                  |               |            |            |            |          |          |          |      |      |      |      |      |
|----------|----------------------------------|---------------|------------|------------|------------|----------|----------|----------|------|------|------|------|------|
| 07120002 | Iroquois                         | Upper Miss. R | 15,364,160 | 8,663,649  | 23,667,073 | 2,774.81 | 1,564.68 | 4,274.34 | 16.8 | 0.6  | 26.2 | 46.6 | 9.7  |
| 07120003 | Chicago                          | Upper Miss. R | 6,522,917  | 3,159,767  | 12,977,836 | 4,143.53 | 2,007.17 | 8,243.87 | 5.8  | 93.0 | 0.4  | 0.8  | 0.1  |
| 07120004 | Des Plaines                      | Upper Miss. R | 19,335,826 | 10,169,930 | 33,276,562 | 4,950.67 | 2,603.87 | 8,520.00 | 9.3  | 83.7 | 2.5  | 3.9  | 0.7  |
| 07120005 | Upper Illinois                   | Upper Miss. R | 5,920,960  | 3,217,017  | 11,704,672 | 2,311.01 | 1,255.63 | 4,568.44 | 20.6 | 7.8  | 25.4 | 42.5 | 3.8  |
| 07120006 | Upper Fox                        | Upper Miss. R | 3,389,797  | 1,658,831  | 6,809,636  | 862.20   | 421.93   | 1,732.04 | 26.3 | 28.1 | 15.5 | 20.8 | 9.3  |
| 07120007 | Lower Fox                        | Upper Miss. R | 7,710,903  | 3,592,817  | 14,009,369 | 2,697.90 | 1,257.06 | 4,901.62 | 18.5 | 13.5 | 21.1 | 38.8 | 8.1  |
| 07130001 | Lower Illinois-Senachwine Lake   | Upper Miss. R | 8,313,487  | 4,541,624  | 14,434,747 | 1,625.56 | 888.04   | 2,822.47 | 19.2 | 2.9  | 24.6 | 49.0 | 4.2  |
| 07130002 | Vermilion                        | Upper Miss. R | 8,586,113  | 3,998,294  | 14,128,099 | 2,492.70 | 1,160.78 | 4,101.64 | 18.7 | 1.6  | 28.1 | 45.8 | 5.8  |
| 07130003 | Lower Illinois-Lake Chautauqua   | Upper Miss. R | 5,971,231  | 3,196,000  | 12,016,998 | 1,530.41 | 819.13   | 3,079.93 | 20.3 | 15.5 | 19.9 | 39.3 | 5.0  |
| 07130004 | Mackinaw                         | Upper Miss. R | 5,247,582  | 2,735,797  | 9,520,327  | 1,757.61 | 916.32   | 3,188.71 | 17.3 | 1.6  | 26.1 | 47.3 | 7.7  |
| 07130005 | Spoon                            | Upper Miss. R | 8,833,883  | 3,975,579  | 15,021,504 | 1,823.91 | 820.83   | 3,101.46 | 19.5 | 1.6  | 25.1 | 45.8 | 8.0  |
| 07130006 | Upper Sangamon                   | Upper Miss. R | 7,615,421  | 3,959,168  | 12,684,422 | 2,026.59 | 1,053.60 | 3,375.54 | 15.6 | 9.7  | 25.2 | 47.1 | 2.4  |
| 07130007 | South Fork Sangamon              | Upper Miss. R | 5,751,739  | 2,657,502  | 9,065,299  | 1,924.12 | 889.01   | 3,032.59 | 16.7 | 5.2  | 25.7 | 48.1 | 4.3  |
| 07130008 | Lower Sangamon                   | Upper Miss. R | 4,464,691  | 2,234,322  | 7,857,100  | 1,819.71 | 910.66   | 3,202.38 | 17.6 | 8.3  | 22.8 | 45.1 | 6.2  |
| 07130009 | Salt                             | Upper Miss. R | 9,477,724  | 4,513,878  | 17,046,604 | 1,945.09 | 926.37   | 3,498.43 | 16.1 | 4.7  | 26.2 | 47.2 | 5.8  |
| 07130010 | La Moine                         | Upper Miss. R | 5,209,083  | 2,059,812  | 9,207,302  | 1,436.07 | 567.86   | 2,538.32 | 21.9 | 1.5  | 25.1 | 43.8 | 7.6  |
| 07130011 | Lower Illinois                   | Upper Miss. R | 8,106,820  | 4,076,554  | 16,034,725 | 1,363.92 | 685.85   | 2,697.73 | 21.8 | 2.8  | 23.1 | 41.5 | 10.8 |
| 07130012 | Macoupin                         | Upper Miss. R | 3,613,690  | 1,856,060  | 5,898,749  | 1,463.65 | 751.76   | 2,389.16 | 20.5 | 1.5  | 25.1 | 43.0 | 9.8  |
| 07140101 | Cahokia-Joachim                  | Mississippi R | 7,195,506  | 2,736,017  | 13,715,133 | 1,676.97 | 637.65   | 3,196.43 | 17.2 | 59.6 | 6.7  | 13.4 | 3.1  |
| 07140102 | Meramec                          | Meramec       | 3,374,910  | 1,808,594  | 5,459,530  | 605.61   | 324.54   | 979.68   | 57.5 | 19.3 | 0.8  | 17.1 | 5.3  |
| 07140103 | Bourbeuse                        | Meramec       | 1,559,422  | 792,529    | 2,987,010  | 716.25   | 364.01   | 1,371.95 | 47.9 | 2.0  | 2.7  | 32.2 | 15.2 |
| 07140104 | Big                              | Meramec       | 1,231,782  | 520,213    | 2,079,061  | 489.92   | 206.91   | 826.91   | 73.2 | 1.8  | 1.5  | 13.5 | 10.0 |
| 07140105 | Upper Mississippi-Cape Girardeau | Mississippi R | 4,117,023  | 2,056,523  | 7,033,724  | 950.30   | 474.69   | 1,623.55 | 38.0 | 4.1  | 15.0 | 34.6 | 8.3  |
| 07140106 | Big Muddy                        | Big Muddy     | 5,473,645  | 2,720,451  | 9,778,070  | 874.57   | 434.67   | 1,562.33 | 32.3 | 6.7  | 18.2 | 36.3 | 6.4  |
| 07140107 | Whitewater                       | Whitewater    | 2,735,979  | 1,308,600  | 5,416,429  | 819.59   | 392.01   | 1,622.55 | 45.7 | 0.0  | 10.3 | 34.1 | 9.9  |
| 07140108 | Cache                            | Cashe         | 869,290    | 398,776    | 1,583,585  | 977.22   | 448.29   | 1,780.21 | 40.0 | 0.7  | 18.1 | 37.4 | 3.8  |
| 07140201 | Upper Kaskaskia                  | Kaskaskia     | 6,367,594  | 3,129,135  | 11,094,218 | 1,572.42 | 772.71   | 2,739.61 | 18.8 | 2.5  | 27.8 | 46.2 | 4.7  |
| 07140202 | Middle Kaskaskia                 | Kaskaskia     | 4,883,184  | 2,252,682  | 7,392,692  | 1,103.16 | 508.90   | 1,670.09 | 22.9 | 2.8  | 20.7 | 40.7 | 12.9 |
| 07140203 | Shoal                            | Kaskaskia     | 3,053,296  | 1,648,439  | 5,358,078  | 1,281.98 | 692.13   | 2,249.69 | 21.4 | 3.2  | 21.4 | 40.3 | 13.6 |
| 07140204 | Lower Kaskaskia                  | Kaskaskia     | 6,055,893  | 2,494,506  | 11,514,787 | 1,463.27 | 602.74   | 2,782.28 | 20.9 | 9.4  | 19.4 | 39.8 | 10.5 |
| 09010001 | Upper Souris                     | Souris River  | 2,367,756  | 1,118,363  | 4,530,225  | 416.10   | 196.53   | 796.12   | 20.0 | 2.4  | 38.4 | 38.8 | 0.4  |
| 09010002 | Des Lacs                         | Souris River  | 159,650    | 75,306     | 284,072    | 61.06    | 28.80    | 108.64   | 18.6 | 0.0  | 38.2 | 42.3 | 0.9  |
| 09010003 | Lower Souris                     | Souris River  | 503,798    | 246,100    | 902,453    | 85.36    | 41.70    | 152.91   | 23.2 | 0.0  | 33.6 | 42.9 | 0.3  |
| 09010004 | Willow                           | Souris River  | 407,258    | 197,576    | 845,659    | 84.22    | 40.86    | 174.89   | 26.3 | 0.0  | 35.5 | 37.1 | 1.1  |
| 09010005 | Deep                             | Souris River  | 201,378    | 84,996     | 405,621    | 43.97    | 18.56    | 88.57    | 20.9 | 0.0  | 37.5 | 40.9 | 0.7  |
| 09020101 | Bois De Sioux                    | Red River     | 912,675    | 480,114    | 1,822,644  | 450.99   | 237.24   | 900.64   | 18.6 | 0.2  | 32.6 | 43.6 | 5.0  |
| 09020102 | Mustinka                         | Red River     | 1,658,739  | 747,113    | 2,878,453  | 614.81   | 276.92   | 1,066.89 | 18.2 | 1.0  | 32.5 | 42.9 | 5.4  |
| 09020103 | Otter Tail                       | Red River     | 1,557,558  | 881,227    | 3,098,342  | 286.94   | 162.34   | 570.79   | 24.8 | 4.2  | 25.2 | 30.3 | 15.5 |
| 09020104 | Upper Red                        | Red River     | 1,165,165  | 625,978    | 1,903,682  | 1,097.05 | 589.38   | 1,792.39 | 13.6 | 25.8 | 24.7 | 33.1 | 2.7  |
| 09020105 | Western Wild Rice                | Red River     | 3,650,955  | 1,746,936  | 5,049,596  | 616.88   | 295.17   | 853.21   | 16.9 | 0.0  | 27.3 | 51.5 | 4.3  |
| 09020106 | Buffalo                          | Red River     | 1,689,662  | 894,642    | 3,428,563  | 496.77   | 263.03   | 1,008.01 | 20.5 | 0.9  | 34.3 | 35.9 | 8.5  |
| 09020107 | Elm-Marsh                        | Red River     | 1,946,756  | 989,441    | 3,630,063  | 888.66   | 451.66   | 1,657.06 | 14.0 | 0.3  | 35.6 | 48.9 | 1.2  |
| 09020108 | Eastern Wild Rice                | Red River     | 2,212,028  | 1,108,857  | 3,827,960  | 514.25   | 257.79   | 889.92   | 22.6 | 1.2  | 35.6 | 34.4 | 6.2  |
| 09020109 | Goose                            | Red River     | 1,019,383  | 526,606    | 1,743,117  | 298.40   | 154.15   | 510.25   | 13.7 | 0.0  | 33.3 | 52.7 | 0.3  |
| 09020201 | Devils Lake                      | Red River     | 95,162     | 43,810     | 178,992    | 10.29    | 4.74     | 19.36    | 23.2 | 0.0  | 31.9 | 44.1 | 0.8  |
| 09020202 | Upper Sheyenne                   | Red River     | 333,547    | 118,423    | 750,435    | 64.47    | 22.89    | 145.05   | 23.3 | 0.0  | 32.7 | 42.9 | 1.1  |
| 09020203 | Middle Sheyenne                  | Red River     | 672,198    | 305,126    | 1,064,074  | 127.28   | 57.78    | 201.49   | 24.8 | 0.0  | 32.4 | 41.7 | 1.1  |
| 09020204 | Lower Sheyenne                   | Red River     | 2,936,218  | 1,272,539  | 5,229,634  | 605.53   | 262.43   | 1,078.49 | 18.3 | 1.4  | 31.1 | 47.3 | 1.9  |
| 09020205 | Maple                            | Red River     | 1,873,445  | 830,617    | 3,132,112  | 481.62   | 213.53   | 805.19   | 15.4 | 0.0  | 34.5 | 48.8 | 1.2  |

|          |                   |             |           |         |           |        |        |          |       |      |      |      |     |
|----------|-------------------|-------------|-----------|---------|-----------|--------|--------|----------|-------|------|------|------|-----|
| 09020301 | Sandhill-Wilson   | Red River   | 1,707,449 | 863,774 | 2,982,831 | 568.58 | 287.64 | 993.28   | 15.4  | 0.1  | 36.9 | 46.1 | 1.5 |
| 09020302 | Red Lakes         | Red River   | 21,604    | 10,119  | 45,689    | 4.52   | 2.12   | 9.55     | 91.3  | 0.0  | 1.8  | 3.0  | 3.9 |
| 09020303 | Red Lake          | Red River   | 1,760,501 | 857,531 | 2,906,949 | 543.15 | 264.56 | 896.85   | 21.0  | 6.5  | 38.1 | 31.8 | 2.7 |
| 09020304 | Thief             | Red River   | 255,296   | 115,422 | 395,957   | 90.30  | 40.82  | 140.05   | 24.8  | 0.0  | 38.5 | 34.1 | 2.6 |
| 09020305 | Clearwater        | Red River   | 965,816   | 459,471 | 1,448,377 | 279.44 | 132.94 | 419.06   | 32.0  | 1.4  | 28.6 | 31.1 | 7.0 |
| 09020306 | Grand Marais-Red  | Red River   | 903,479   | 366,683 | 1,467,599 | 744.46 | 302.14 | 1,209.28 | 13.6  | 6.1  | 37.8 | 40.7 | 1.7 |
| 09020307 | Turtle            | Red River   | 829,093   | 353,572 | 1,456,134 | 468.64 | 199.86 | 823.07   | 9.6   | 25.7 | 26.1 | 38.1 | 0.5 |
| 09020308 | Forest            | Red River   | 545,386   | 261,543 | 990,825   | 203.59 | 97.63  | 369.88   | 12.1  | 0.0  | 32.6 | 54.9 | 0.4 |
| 09020309 | Snake             | Red River   | 1,081,603 | 451,389 | 1,999,140 | 395.81 | 165.18 | 731.58   | 16.0  | 1.6  | 43.0 | 37.3 | 2.1 |
| 09020310 | Park              | Red River   | 1,422,671 | 689,516 | 2,722,398 | 466.39 | 226.04 | 892.48   | 11.7  | 1.6  | 30.9 | 55.5 | 0.2 |
| 09020311 | Lower Red         | Red River   | 1,420,144 | 597,111 | 2,402,888 | 712.73 | 299.67 | 1,205.94 | 15.2  | 0.2  | 41.8 | 41.3 | 1.6 |
| 09020312 | Two Rivers        | Red River   | 1,531,192 | 748,649 | 2,778,037 | 521.09 | 254.78 | 945.41   | 18.3  | 0.6  | 41.7 | 35.9 | 3.5 |
| 09020313 | Pembina           | Red River   | 1,556,799 | 661,167 | 2,734,295 | 448.58 | 190.51 | 787.86   | 13.9  | 0.0  | 32.6 | 53.1 | 0.3 |
| 09020314 | Roseau            | Rainy River | 1,036,267 | 541,603 | 1,945,456 | 245.28 | 128.19 | 460.47   | 35.5  | 1.3  | 30.2 | 27.4 | 5.6 |
| 09030001 | Rainy Headwaters  | Rainy River | 60,677    | 32,529  | 109,544   | 7.90   | 4.23   | 14.26    | 100.0 | 0.0  | 0.0  | 0.0  | 0.0 |
| 09030002 | Vermilion         | Rainy River | 143,055   | 66,712  | 257,415   | 53.46  | 24.93  | 96.20    | 95.8  | 3.2  | 0.4  | 0.2  | 0.4 |
| 09030003 | Rainy Lake        | Rainy River | 230,103   | 85,356  | 375,465   | 80.96  | 30.03  | 132.10   | 96.6  | 0.0  | 1.5  | 1.3  | 0.6 |
| 09030004 | Upper Rainy       | Rainy River | 145,047   | 73,289  | 276,218   | 48.11  | 24.31  | 91.61    | 98.3  | 0.0  | 0.8  | 0.6  | 0.3 |
| 09030005 | Little Fork       | Rainy River | 796,609   | 359,280 | 1,592,027 | 162.54 | 73.31  | 324.84   | 94.7  | 0.5  | 2.0  | 1.5  | 1.4 |
| 09030006 | Big Fork          | Rainy River | 737,181   | 347,566 | 1,265,074 | 134.73 | 63.52  | 231.20   | 96.4  | 0.3  | 0.9  | 1.7  | 0.7 |
| 09030007 | Rapid             | Rainy River | 370,904   | 169,234 | 646,509   | 135.28 | 61.72  | 235.80   | 91.0  | 0.0  | 3.9  | 4.3  | 0.8 |
| 09030008 | Lower Rainy       | Rainy River | 85,541    | 40,360  | 139,502   | 68.33  | 32.24  | 111.44   | 66.1  | 0.0  | 14.1 | 17.1 | 2.7 |
| 09030009 | Lake of the Woods | Rainy River | 224,601   | 119,978 | 352,367   | 104.82 | 55.99  | 164.44   | 55.0  | 0.1  | 19.0 | 21.6 | 4.3 |

Table S6\_TP. Total annual phosphorus and nitrogen loads and yields, with confidence intervals, for all tributaries to each lake with a drainage area greater than 150 square kilometers.

Tributaries to each Great Lake are ranked based on their relative loads and yields. A value of 1 indicates it has the largest load or relatively largest yield.

All loads and yields are adjusted to remove known spatial biases by only predicting areas that are not monitored. This results in very small standard errors and confidence intervals for basins for which a large percentage is monitored.

Supplemental Material to Robertson and Saad, 2011, *Journal of the American Water Resources Association, Nutrient Inputs to the Laurentian Great Lakes By Source and River Basin Estimated Using SPARROW Watershed Models.*

Yield is load per unit area of the HUC8 watershed.

[%, percent; CI, Confidence interval; kg, kilogram; km<sup>2</sup>, square kilometer]

| Great Lake/River Basin | River Name      | MRB Identification Number | Area (km <sup>2</sup> ) | Total Phosphorus           |                            |                                                 |                                         |                                         |                                              |                             | Percent Contribution by Source |               |                |                    |                   |                     |
|------------------------|-----------------|---------------------------|-------------------------|----------------------------|----------------------------|-------------------------------------------------|-----------------------------------------|-----------------------------------------|----------------------------------------------|-----------------------------|--------------------------------|---------------|----------------|--------------------|-------------------|---------------------|
|                        |                 |                           |                         | Total Phosphorus Load (kg) | Total Phosphorus Load Rank | Standard Error in Phosphorus Load Estimate (kg) | Lower 95% CI Total Phosphorus Load (kg) | Upper 95% CI Total Phosphorus Load (kg) | Total Phosphorus Yield (kg/km <sup>2</sup> ) | Total Phosphorus Yield Rank | Forest, wetland, shrub         | Point sources | Urban and open | Fertilizers (farm) | Manure (confined) | Manure (unconfined) |
| Erie                   | MAUMEE R        | 11873                     | 16,948                  | 1,653,319                  | 1                          | 103,727                                         | 1,547,561                               | 1,845,445                               | 97.6                                         | 8                           | 1.7                            | 26.1          | 9.0            | 36.8               | 24.4              | 2.0                 |
| Erie                   | RIVER ROUGE     | 11782                     | 1,208                   | 711,507                    | 2                          | 437,646                                         | 234,141                                 | 1,300,085                               | 589.1                                        | 1                           | 0.1                            | 92.4          | 7.2            | 0.2                | 0.1               | 0.0                 |
| Erie                   | SANDUSKY R      | 11898                     | 3,462                   | 366,155                    | 3                          | 3,992                                           | 362,242                                 | 372,639                                 | 105.8                                        | 6                           | 2.1                            | 9.3           | 7.3            | 56.4               | 22.5              | 2.3                 |
| Erie                   | CUYAHOGA R      | 11920                     | 2,091                   | 267,787                    | 4                          | 3,422                                           | 264,956                                 | 271,980                                 | 128.1                                        | 4                           | 4.1                            | 71.3          | 18.7           | 3.3                | 1.8               | 0.7                 |
| Erie                   | CATTARAUGUS CR  | 11946                     | 1,449                   | 146,757                    | 5                          | 5,777                                           | 140,338                                 | 155,017                                 | 101.3                                        | 7                           | 26.7                           | 5.9           | 7.1            | 14.6               | 38.0              | 7.6                 |
| Erie                   | CLINTON R       | 12280                     | 2,570                   | 140,416                    | 6                          | 13,432                                          | 127,145                                 | 152,497                                 | 54.6                                         | 15                          | 3.3                            | 51.2          | 37.2           | 5.6                | 1.9               | 0.6                 |
| Erie                   | HURON R         | 11910                     | 1,078                   | 115,679                    | 7                          | 4,607                                           | 110,543                                 | 121,226                                 | 107.3                                        | 5                           | 4.2                            | 11.8          | 6.0            | 59.4               | 16.2              | 2.4                 |
| Erie                   | BLACK R         | 11753                     | 1,853                   | 107,066                    | 8                          | 473                                             | 106,505                                 | 107,703                                 | 57.8                                         | 12                          | 8.6                            | 4.6           | 11.3           | 42.2               | 27.2              | 6.0                 |
| Erie                   | ROCKY R         | 11917                     | 756                     | 98,123                     | 9                          | 6,713                                           | 91,210                                  | 106,283                                 | 129.8                                        | 3                           | 8.9                            | 48.7          | 23.5           | 10.5               | 6.6               | 1.8                 |
| Erie                   | VERMILLION R    | 11913                     | 678                     | 97,247                     | 10                         | 551                                             | 96,619                                  | 98,369                                  | 143.5                                        | 2                           | 8.0                            | 8.9           | 4.0            | 53.3               | 21.5              | 4.2                 |
| Erie                   | GRAND R         | 11931                     | 1,839                   | 94,147                     | 11                         | 2,410                                           | 92,007                                  | 96,301                                  | 51.2                                         | 16                          | 24.8                           | 4.5           | 11.4           | 31.8               | 20.9              | 6.6                 |
| Erie                   | BUFFALO CR      | 11961                     | 1,167                   | 84,732                     | 12                         | 35,095                                          | 46,265                                  | 128,505                                 | 72.6                                         | 9                           | 13.4                           | 28.3          | 13.9           | 11.7               | 28.3              | 4.4                 |
| Erie                   | PORTAGE R       | 11892                     | 1,477                   | 81,813                     | 13                         | 47,501                                          | 33,766                                  | 171,518                                 | 55.4                                         | 13                          | 1.7                            | 14.7          | 10.2           | 64.7               | 7.9               | 0.9                 |
| Erie                   | HURON R         | 12520                     | 2,390                   | 65,567                     | 14                         | 16,970                                          | 46,555                                  | 94,030                                  | 27.4                                         | 26                          | 4.5                            | 49.4          | 35.1           | 6.9                | 3.3               | 0.7                 |
| Erie                   | BLACK R         | 11914                     | 1,230                   | 54,786                     | 15                         | 12,509                                          | 40,452                                  | 69,020                                  | 44.5                                         | 18                          | 7.6                            | 28.8          | 17.8           | 28.1               | 14.6              | 3.0                 |
| Erie                   | RIVER RAISIN    | 11795                     | 2,843                   | 39,435                     | 16                         | 47                                              | 39,397                                  | 39,502                                  | 13.9                                         | 29                          | 4.1                            | 32.5          | 15.9           | 29.9               | 15.1              | 2.5                 |
| Erie                   | CHAGRIN R       | 11927                     | 673                     | 36,809                     | 17                         | 6,273                                           | 30,220                                  | 45,400                                  | 54.7                                         | 14                          | 13.8                           | 40.8          | 32.3           | 8.2                | 3.1               | 1.9                 |
| Erie                   | BELLE R         | 11763                     | 577                     | 34,561                     | 18                         | 20,267                                          | 13,792                                  | 63,067                                  | 59.8                                         | 10                          | 7.4                            | 53.5          | 9.6            | 17.9               | 8.7               | 2.9                 |
| Erie                   | TOUSSAINT CR    | 11891                     | 594                     | 23,227                     | 19                         | 13,502                                          | 9,770                                   | 38,553                                  | 39.1                                         | 22                          | 1.2                            | 27.4          | 17.0           | 49.8               | 4.1               | 0.5                 |
| Erie                   | ASHTABULA R     | 11930                     | 361                     | 21,094                     | 20                         | 12,046                                          | 8,035                                   | 39,399                                  | 58.4                                         | 11                          | 24.5                           | 9.1           | 11.6           | 24.3               | 24.2              | 6.3                 |
| Erie                   | CONNEAUT CR     | 11936                     | 487                     | 19,755                     | 21                         | 1,826                                           | 17,705                                  | 23,298                                  | 40.5                                         | 21                          | 27.7                           | 7.4           | 12.1           | 16.8               | 28.6              | 7.5                 |
| Erie                   | OTTAWA CR       | 11794                     | 440                     | 19,264                     | 22                         | 12,492                                          | 6,637                                   | 36,674                                  | 43.8                                         | 19                          | 1.4                            | 7.5           | 51.1           | 27.5               | 11.4              | 1.2                 |
| Erie                   | EIGHTEENMILE CR | 11959                     | 305                     | 13,825                     | 23                         | 7,938                                           | 5,377                                   | 28,103                                  | 45.4                                         | 17                          | 27.4                           | 0.0           | 10.7           | 19.8               | 36.9              | 5.2                 |
| Erie                   | MUDDY CR        | 11897                     | 300                     | 12,527                     | 24                         | 7,349                                           | 5,676                                   | 25,231                                  | 41.8                                         | 20                          | 2.6                            | 2.1           | 10.6           | 74.3               | 8.4               | 2.0                 |
| Erie                   | PINE R          | 11762                     | 470                     | 11,743                     | 25                         | 6,778                                           | 4,589                                   | 23,101                                  | 25.0                                         | 28                          | 25.4                           | 1.4           | 22.7           | 31.5               | 13.4              | 5.6                 |
| Erie                   | STONY CR        | 11793                     | 359                     | 9,906                      | 26                         | 5,896                                           | 3,851                                   | 20,172                                  | 27.6                                         | 25                          | 3.8                            | 36.8          | 30.5           | 21.6               | 6.3               | 1.1                 |
| Erie                   | GREEN CR        | 11909                     | 284                     | 9,692                      | 27                         | 5,691                                           | 3,507                                   | 18,133                                  | 34.1                                         | 23                          | 2.4                            | 0.1           | 13.5           | 70.5               | 11.3              | 2.2                 |
| Erie                   | ELK CR          | 11937                     | 251                     | 8,431                      | 28                         | 4,840                                           | 3,459                                   | 16,446                                  | 33.6                                         | 24                          | 27.5                           | 0.4           | 16.1           | 24.7               | 23.6              | 7.7                 |
| Erie                   | SWAN CR         | 11790                     | 281                     | 7,524                      | 29                         | 4,492                                           | 2,755                                   | 14,285                                  | 26.8                                         | 27                          | 6.6                            | 4.8           | 34.3           | 46.0               | 6.6               | 1.7                 |
| Huron                  | SAGINAW R       | 11747                     | 16,258                  | 487,521                    | 1                          | 25,944                                          | 459,427                                 | 533,504                                 | 30.0                                         | 4                           | 7.2                            | 46.1          | 19.1           | 16.5               | 8.9               | 2.2                 |
| Huron                  | THUNDER BAY R   | 11606                     | 3,306                   | 45,048                     | 2                          | 26,046                                          | 15,831                                  | 76,992                                  | 13.6                                         | 13                          | 36.7                           | 21.6          | 22.5           | 5.4                | 9.4               | 4.4                 |
| Huron                  | PINNEBOG R      | 11661                     | 462                     | 30,382                     | 3                          | 17,695                                          | 9,975                                   | 55,357                                  | 65.7                                         | 1                           | 2.2                            | 19.5          | 6.9            | 31.6               | 37.2              | 2.6                 |
| Huron                  | AU SABLE R      | 11619                     | 5,265                   | 22,540                     | 4                          | 4,800                                           | 17,086                                  | 27,098                                  | 4.3                                          | 20                          | 44.1                           | 3.1           | 45.0           | 1.4                | 3.4               | 3.1                 |
| Huron                  | RIFLE R         | 11652                     | 972                     | 19,352                     | 5                          | 11,259                                          | 7,232                                   | 33,941                                  | 19.9                                         | 7                           | 24.6                           | 22.7          | 27.4           | 7.5                | 14.5              | 3.3                 |
| Huron                  | CHEBOYGAN R     | 11593                     | 3,900                   | 17,740                     | 6                          | 11,405                                          | 5,797                                   | 31,750                                  | 4.5                                          | 19                          | 47.8                           | 5.7           | 35.0           | 2.8                | 5.3               | 3.5                 |
| Huron                  | AU GRES R       | 11647                     | 745                     | 16,751                     | 7                          | 9,676                                           | 7,587                                   | 37,208                                  | 22.5                                         | 5                           | 24.9                           | 7.1           | 18.2           | 16.4               | 26.6              | 6.9                 |
| Huron                  | PIGEON R        | 11660                     | 399                     | 16,517                     | 8                          | 9,746                                           | 6,890                                   | 31,368                                  | 41.4                                         | 3                           | 2.4                            | 3.5           | 6.6            | 39.2               | 45.1              | 3.2                 |
| Huron                  | WILLOW R        | 11664                     | 263                     | 14,372                     | 9                          | 8,410                                           | 4,810                                   | 21,951                                  | 54.6                                         | 2                           | 4.0                            | 0.0           | 5.4            | 40.1               | 47.2              | 3.3                 |
| Huron                  | PINE R          | 11578                     | 739                     | 13,639                     | 10                         | 8,007                                           | 4,985                                   | 26,174                                  | 18.5                                         | 9                           | 38.6                           | 44.4          | 11.9           | 0.3                | 2.5               | 2.3                 |
| Huron                  | MUNUSCONG R     | 12285                     | 633                     | 10,437                     | 11                         | 6,024                                           | 4,030                                   | 20,034                                  | 16.5                                         | 10                          | 47.1                           | 19.4          | 19.2           | 1.1                | 8.6               | 4.7                 |
| Huron                  | KAWKAWLIN R     | 11654                     | 576                     | 8,220                      | 12                         | 5,105                                           | 2,718                                   | 17,103                                  | 14.3                                         | 12                          | 12.3                           | 1.9           | 42.1           | 37.0               | 4.8               | 1.9                 |

|          |                  |       |         |         |    |         |         |         |      |    |      |      |      |      |      |      |
|----------|------------------|-------|---------|---------|----|---------|---------|---------|------|----|------|------|------|------|------|------|
| Huron    | WHITNEY DRAIN    | 11643 | 374     | 5,021   | 13 | 2,922   | 1,916   | 10,392  | 13.4 | 15 | 38.6 | 2.9  | 25.9 | 9.8  | 16.0 | 6.9  |
| Huron    | SILVER CR        | 11640 | 385     | 4,564   | 14 | 2,688   | 1,802   | 9,795   | 11.9 | 16 | 27.6 | 25.9 | 31.8 | 3.5  | 7.6  | 3.6  |
| Huron    | PINE R, N BR     | 11658 | 255     | 3,827   | 15 | 2,361   | 1,630   | 7,310   | 15.0 | 11 | 12.9 | 3.8  | 44.5 | 26.9 | 9.9  | 1.9  |
| Huron    | OCQUEOC R        | 11584 | 361     | 3,633   | 16 | 2,117   | 1,462   | 6,836   | 10.1 | 17 | 55.8 | 0.0  | 28.7 | 6.8  | 5.1  | 3.6  |
| Huron    | CARP R           | 11583 | 396     | 3,420   | 17 | 2,007   | 1,284   | 6,836   | 8.6  | 18 | 80.9 | 0.0  | 17.1 | 0.1  | 1.0  | 0.9  |
| Huron    | WISCOGGIN DRAIN  | 11659 | 167     | 3,161   | 18 | 1,869   | 1,360   | 5,551   | 18.9 | 8  | 1.3  | 0.0  | 16.9 | 56.3 | 21.6 | 3.9  |
| Huron    | CHARLOTTE R      | 12284 | 152     | 3,050   | 19 | 1,767   | 1,123   | 5,922   | 20.1 | 6  | 50.0 | 0.0  | 17.6 | 2.6  | 18.6 | 11.2 |
| Huron    | LONG L CR        | 11588 | 176     | 2,388   | 20 | 1,385   | 781     | 5,590   | 13.6 | 14 | 47.6 | 0.0  | 24.0 | 12.6 | 10.5 | 5.3  |
| Michigan | FOX R            | 11232 | 16,459  | 634,948 | 1  | 0       | 634,948 | 634,948 | 38.6 | 16 | 7.6  | 23.3 | 9.1  | 15.7 | 38.3 | 6.0  |
| Michigan | GRAND R          | 11412 | 14,205  | 483,160 | 2  | 26,514  | 454,717 | 527,518 | 34.0 | 18 | 6.2  | 26.4 | 17.4 | 20.4 | 26.3 | 3.4  |
| Michigan | ST JOSEPH R      | 11271 | 12,196  | 385,329 | 3  | 1       | 385,328 | 385,330 | 31.6 | 20 | 4.4  | 26.8 | 21.2 | 20.3 | 23.9 | 3.5  |
| Michigan | KALAMAZOO R      | 11343 | 5,249   | 253,971 | 4  | 111,413 | 156,065 | 492,685 | 48.4 | 9  | 4.7  | 38.6 | 14.5 | 11.6 | 28.3 | 2.2  |
| Michigan | MUSKEGON R       | 11488 | 7,047   | 105,162 | 5  | 61,776  | 37,402  | 198,052 | 14.9 | 32 | 23.1 | 13.1 | 29.9 | 9.2  | 20.0 | 4.7  |
| Michigan | MENOMINEE R      | 11104 | 10,525  | 87,273  | 6  | 8,160   | 78,472  | 98,520  | 8.3  | 46 | 50.8 | 25.8 | 14.2 | 2.1  | 5.3  | 1.8  |
| Michigan | MANISTEE R       | 11515 | 5,046   | 79,451  | 7  | 30,897  | 46,115  | 130,357 | 15.7 | 28 | 24.2 | 50.0 | 19.5 | 2.1  | 2.6  | 1.7  |
| Michigan | MANITOWOC R      | 11019 | 1,395   | 64,767  | 8  | 8,435   | 55,710  | 75,828  | 46.4 | 13 | 3.8  | 20.7 | 4.4  | 11.9 | 52.0 | 7.1  |
| Michigan | SHEBOYGAN R      | 11027 | 1,112   | 48,911  | 9  | 1,704   | 47,074  | 51,650  | 44.0 | 15 | 3.6  | 41.3 | 6.4  | 10.7 | 33.2 | 4.8  |
| Michigan | MILWAUKEE R      | 11260 | 2,260   | 47,313  | 10 | 43      | 47,283  | 47,345  | 20.9 | 24 | 3.1  | 53.5 | 20.3 | 5.8  | 15.1 | 2.2  |
| Michigan | W TWIN R         | 11016 | 444     | 43,641  | 11 | 25,464  | 17,144  | 74,656  | 98.4 | 1  | 4.0  | 2.8  | 4.4  | 13.4 | 65.9 | 9.5  |
| Michigan | PORTAGE R        | 11247 | 904.4   | 41,916  | 12 | 15,311  | 27,041  | 63,954  | 46.3 | 14 | 7.6  | 24.7 | 38.1 | 24.3 | 3.9  | 1.4  |
| Michigan | MANISTIQUE R     | 11543 | 3,778   | 41,298  | 13 | 11      | 41,289  | 41,308  | 10.9 | 39 | 62.0 | 19.9 | 16.3 | 0.5  | 0.6  | 0.7  |
| Michigan | BLACK CR         | 11467 | 387     | 37,257  | 14 | 23,048  | 15,435  | 75,989  | 96.2 | 2  | 1.9  | 81.9 | 9.7  | 1.9  | 4.3  | 0.3  |
| Michigan | PERE MARQUETTE R | 11477 | 2,002   | 35,337  | 15 | 4,639   | 30,159  | 40,711  | 17.7 | 27 | 39.6 | 12.1 | 27.3 | 9.1  | 9.4  | 2.5  |
| Michigan | ESCANABA R       | 11141 | 2,389   | 32,045  | 16 | 18,596  | 13,008  | 59,152  | 13.4 | 33 | 58.5 | 18.0 | 17.3 | 1.6  | 3.1  | 1.5  |
| Michigan | OCONTO R         | 11051 | 2,558   | 30,662  | 17 | 329     | 30,316  | 31,213  | 12.0 | 36 | 21.6 | 5.7  | 11.6 | 13.9 | 39.7 | 7.3  |
| Michigan | ROOT R           | 11258 | 506     | 23,526  | 18 | 4,770   | 18,707  | 30,119  | 46.5 | 12 | 4.9  | 32.6 | 23.6 | 20.8 | 15.4 | 2.7  |
| Michigan | WHITE R          | 90615 | 1,373   | 21,542  | 19 | 12,543  | 7,689   | 42,198  | 15.7 | 29 | 24.4 | 21.2 | 25.0 | 12.5 | 14.5 | 2.5  |
| Michigan | BLACK R          | 11332 | 666     | 21,263  | 20 | 12,453  | 8,028   | 41,652  | 31.9 | 19 | 9.7  | 10.4 | 15.4 | 18.4 | 43.2 | 2.9  |
| Michigan | PESHTIGO R       | 11061 | 2,937   | 20,322  | 21 | 1,001   | 19,229  | 21,964  | 6.9  | 49 | 40.4 | 8.9  | 17.0 | 7.7  | 21.2 | 5.0  |
| Michigan | KEWAUNEE R       | 11040 | 357     | 20,196  | 22 | 2,385   | 17,803  | 23,689  | 56.6 | 6  | 3.0  | 2.6  | 3.3  | 15.4 | 66.9 | 8.8  |
| Michigan | DUCK CR          | 11050 | 391     | 18,822  | 23 | 2,740   | 15,665  | 23,085  | 48.1 | 10 | 4.9  | 1.1  | 14.8 | 16.4 | 54.5 | 8.3  |
| Michigan | FORD R           | 11131 | 1,232   | 18,821  | 24 | 11,001  | 7,473   | 35,591  | 15.3 | 30 | 76.1 | 2.8  | 11.6 | 2.3  | 4.8  | 2.4  |
| Michigan | AHNAPEE R        | 11037 | 302     | 18,676  | 25 | 10,894  | 7,627   | 31,354  | 61.8 | 5  | 6.7  | 3.7  | 5.0  | 17.5 | 59.5 | 7.6  |
| Michigan | PENSAUKEE R      | 11045 | 379     | 17,662  | 26 | 10,337  | 6,777   | 33,830  | 46.6 | 11 | 9.0  | 0.8  | 7.1  | 16.3 | 57.8 | 8.9  |
| Michigan | CEDAR R          | 11137 | 973     | 17,494  | 27 | 10,132  | 7,006   | 29,929  | 18.0 | 26 | 55.2 | 7.6  | 14.0 | 4.5  | 14.6 | 4.1  |
| Michigan | MACATAWA R       | 11337 | 218     | 16,755  | 28 | 10,017  | 6,061   | 33,302  | 76.9 | 3  | 1.0  | 3.7  | 17.3 | 13.8 | 61.9 | 2.4  |
| Michigan | E TWIN R         | 11015 | 345     | 16,717  | 29 | 9,824   | 7,241   | 32,244  | 48.5 | 8  | 4.5  | 23.1 | 7.5  | 10.9 | 47.8 | 6.2  |
| Michigan | GALIEN R         | 11253 | 464     | 16,006  | 30 | 9,309   | 6,505   | 31,438  | 34.5 | 17 | 13.1 | 26.4 | 11.6 | 30.4 | 15.4 | 3.1  |
| Michigan | PIGEON R         | 11026 | 216     | 15,462  | 31 | 9,055   | 6,055   | 27,545  | 71.6 | 4  | 3.9  | 1.9  | 7.1  | 16.3 | 62.3 | 8.6  |
| Michigan | BOARDMAN R       | 11533 | 730     | 13,464  | 32 | 7,954   | 5,086   | 29,296  | 18.4 | 25 | 21.8 | 36.9 | 34.4 | 3.0  | 2.3  | 1.6  |
| Michigan | PENTWATER R      | 11472 | 414     | 11,788  | 33 | 6,854   | 4,566   | 21,621  | 28.5 | 22 | 11.2 | 42.6 | 15.8 | 18.5 | 9.7  | 2.1  |
| Michigan | PLATTE R         | 12403 | 494     | 11,049  | 34 | 6,795   | 4,741   | 24,734  | 22.4 | 23 | 13.0 | 70.9 | 12.4 | 1.6  | 1.3  | 0.8  |
| Michigan | JORDAN/BOYNE R   | 11538 | 904.8   | 10,722  | 35 | 6,403   | 3,766   | 18,532  | 11.9 | 37 | 27.7 | 33.9 | 25.0 | 4.5  | 6.1  | 2.8  |
| Michigan | SAUMICO R        | 11049 | 211     | 10,358  | 36 | 6,113   | 3,200   | 20,082  | 49.1 | 7  | 5.1  | 15.1 | 8.4  | 11.8 | 51.6 | 8.1  |
| Michigan | WHITEFISH R      | 11152 | 818     | 8,447   | 37 | 4,970   | 3,357   | 14,837  | 10.3 | 40 | 81.7 | 0.0  | 13.0 | 1.2  | 2.6  | 1.5  |
| Michigan | ELK R            | 12398 | 1,297.4 | 7,302   | 38 | 4,461   | 2,749   | 15,594  | 5.6  | 51 | 34.5 | 6.6  | 40.0 | 10.3 | 6.1  | 2.5  |
| Michigan | BETSIIE R        | 11526 | 610     | 6,030   | 39 | 3,765   | 2,211   | 12,062  | 9.9  | 41 | 42.3 | 0.2  | 48.5 | 3.1  | 3.4  | 2.5  |
| Michigan | LITTLE SUAMICO R | 11048 | 186     | 5,576   | 40 | 3,299   | 2,106   | 9,286   | 30.0 | 21 | 8.5  | 0.5  | 12.8 | 15.9 | 53.3 | 9.1  |
| Michigan | STURGEON R       | 11164 | 572     | 4,576   | 41 | 2,684   | 1,696   | 8,869   | 8.0  | 47 | 80.4 | 0.0  | 18.6 | 0.2  | 0.3  | 0.6  |
| Michigan | RAPID R          | 11159 | 347     | 4,499   | 42 | 2,636   | 2,084   | 8,364   | 13.0 | 34 | 80.5 | 0.0  | 13.3 | 1.6  | 2.9  | 1.7  |
| Michigan | LINCOLN R        | 11484 | 278     | 4,220   | 43 | 2,481   | 1,360   | 7,866   | 15.2 | 31 | 27.5 | 0.0  | 29.3 | 19.4 | 19.2 | 4.6  |
| Michigan | BEAR R           | 11541 | 295     | 3,589   | 44 | 2,122   | 1,442   | 6,838   | 12.2 | 35 | 49.8 | 0.0  | 34.2 | 3.6  | 7.8  | 4.5  |
| Michigan | CEDAR R          | 12396 | 331.3   | 3,252   | 45 | 1,945   | 1,374   | 6,152   | 9.8  | 42 | 29.2 | 0.0  | 33.7 | 23.4 | 10.7 | 3.0  |
| Michigan | BIG SABLE R      | 11487 | 466     | 3,099   | 46 | 1,857   | 1,093   | 5,124   | 6.7  | 50 | 50.1 | 0.0  | 32.1 | 7.7  | 7.7  | 2.3  |
| Michigan | MILLECOQUINS R   | 11564 | 273     | 2,663   | 47 | 1,550   | 1,057   | 4,883   | 9.7  | 43 | 61.6 | 0.0  | 24.7 | 0.9  | 9.6  | 3.1  |
| Michigan | FISHDAM R        | 11163 | 256     | 1,977   | 48 | 1,157   | 745     | 3,773   | 7.7  | 48 | 64.7 | 0.0  | 25.4 | 3.5  | 4.4  | 2.0  |

|          |                      |       |        |         |    |         |         |           |      |    |      |      |      |      |      |      |
|----------|----------------------|-------|--------|---------|----|---------|---------|-----------|------|----|------|------|------|------|------|------|
| Michigan | CARP LAKE R          | 11542 | 155    | 1,732   | 49 | 1,013   | 548     | 3,714     | 11.2 | 38 | 54.9 | 0.0  | 29.8 | 3.0  | 7.8  | 4.4  |
| Michigan | DAYS R               | 11161 | 158    | 1,484   | 50 | 874     | 560     | 2,803     | 9.4  | 44 | 75.5 | 0.0  | 19.2 | 1.4  | 2.4  | 1.5  |
| Michigan | MILAKOKIA R          | 11565 | 174.0  | 1,472   | 51 | 868     | 577     | 2,710     | 8.5  | 45 | 83.4 | 0.0  | 15.8 | 0.0  | 0.2  | 0.6  |
| Michigan | BREVOORT R           | 11563 | 234    | 809     | 52 | 491     | 254     | 1,464     | 3.5  | 52 | 75.1 | 0.0  | 23.5 | 0.1  | 0.5  | 0.8  |
| Ontario  | OSWEGO R             | 12147 | 13,182 | 543,010 | 1  | 318,080 | 204,198 | 1,053,202 | 41.2 | 6  | 13.3 | 29.1 | 8.9  | 16.6 | 27.2 | 4.9  |
| Ontario  | GENESEE R            | 12065 | 6,431  | 302,570 | 2  | 156,012 | 124,836 | 490,838   | 47.0 | 4  | 16.3 | 16.1 | 7.7  | 18.9 | 33.8 | 7.2  |
| Ontario  | BLACK R              | 12152 | 4,888  | 145,727 | 3  | 5,337   | 139,764 | 154,991   | 29.8 | 11 | 32.1 | 32.1 | 3.3  | 5.6  | 23.2 | 3.7  |
| Ontario  | TONAWANDA CR         | 11978 | 1,735  | 142,713 | 4  | 82,365  | 57,179  | 306,560   | 82.3 | 2  | 9.4  | 34.1 | 11.4 | 15.3 | 25.3 | 4.6  |
| Ontario  | OAK ORCHARD CR       | 11999 | 574    | 47,536  | 5  | 27,768  | 21,746  | 105,272   | 82.8 | 1  | 7.6  | 38.9 | 4.0  | 25.6 | 19.7 | 4.3  |
| Ontario  | SALMON R             | 12099 | 690    | 22,802  | 6  | 13,832  | 9,406   | 42,552    | 33.0 | 8  | 40.8 | 54.5 | 1.7  | 0.9  | 1.5  | 0.6  |
| Ontario  | EIGHTEENMILE CR      | 11994 | 238    | 15,889  | 7  | 9,515   | 5,955   | 32,811    | 66.8 | 3  | 6.8  | 56.6 | 8.2  | 14.2 | 11.1 | 3.1  |
| Ontario  | SANDY CR             | 12111 | 395    | 14,999  | 8  | 8,700   | 5,279   | 29,840    | 38.0 | 7  | 26.9 | 4.6  | 5.2  | 9.9  | 45.0 | 8.4  |
| Ontario  | IRONDEQUOIT CR       | 12546 | 440    | 12,147  | 9  | 1,477   | 10,805  | 14,114    | 27.6 | 12 | 10.1 | 0.0  | 67.6 | 13.4 | 7.0  | 1.8  |
| Ontario  | PERCH R              | 12564 | 252    | 11,620  | 10 | 6,781   | 4,767   | 19,641    | 46.1 | 5  | 19.2 | 0.0  | 4.9  | 11.7 | 53.9 | 10.3 |
| Ontario  | JOHNSON CR           | 11996 | 245    | 7,461   | 11 | 4,315   | 2,936   | 14,520    | 30.5 | 10 | 15.0 | 9.8  | 9.3  | 41.1 | 18.9 | 5.9  |
| Ontario  | S SANDY CR           | 12108 | 270    | 6,787   | 12 | 3,955   | 2,152   | 13,468    | 25.2 | 14 | 56.6 | 0.0  | 4.5  | 6.0  | 27.6 | 5.3  |
| Ontario  | STERLING CR          | 12095 | 209    | 6,526   | 13 | 3,810   | 2,749   | 11,791    | 31.3 | 9  | 22.2 | 0.0  | 6.6  | 22.7 | 41.2 | 7.3  |
| Ontario  | LITTLE SALMON R      | 12098 | 242    | 5,994   | 14 | 3,475   | 2,164   | 11,902    | 24.8 | 15 | 58.9 | 10.8 | 9.0  | 7.0  | 10.8 | 3.5  |
| Ontario  | WEST CR              | 12006 | 208    | 5,709   | 15 | 3,311   | 1,964   | 10,389    | 27.5 | 13 | 25.0 | 0.0  | 20.4 | 37.9 | 12.7 | 4.0  |
| Superior | ST LOUIS R           | 12311 | 9,409  | 126,934 | 1  | 5,870   | 120,583 | 135,108   | 13.5 | 20 | 69.0 | 13.1 | 11.8 | 1.0  | 2.5  | 2.7  |
| Superior | ONTONAGON R          | 10928 | 3,620  | 83,919  | 2  | 1,248   | 82,570  | 85,905    | 23.2 | 6  | 84.7 | 1.4  | 9.4  | 0.4  | 2.3  | 1.8  |
| Superior | WHITE R              | 10897 | 2,488  | 74,127  | 3  | 73      | 74,048  | 74,262    | 29.8 | 4  | 74.7 | 2.2  | 7.6  | 1.8  | 9.6  | 4.1  |
| Superior | NEMADJI R            | 10877 | 1,199  | 68,426  | 4  | 1,134   | 67,176  | 70,225    | 57.1 | 1  | 70.9 | 0.5  | 10.3 | 1.9  | 9.6  | 6.8  |
| Superior | PORTAGE R            | 12321 | 2,349  | 26,677  | 5  | 15,886  | 10,130  | 51,903    | 11.4 | 26 | 74.2 | 7.6  | 13.1 | 0.9  | 2.8  | 1.3  |
| Superior | TAHQAMENON R         | 10994 | 2,138  | 19,148  | 6  | 11,241  | 7,772   | 34,174    | 9.0  | 35 | 77.6 | 5.8  | 15.3 | 0.3  | 0.4  | 0.6  |
| Superior | PRESQUE ISLE R       | 10918 | 962    | 16,250  | 7  | 9,586   | 5,917   | 27,237    | 16.9 | 16 | 83.7 | 7.0  | 9.2  | 0.0  | 0.0  | 0.0  |
| Superior | BLACK R              | 10915 | 669    | 14,777  | 8  | 8,654   | 4,946   | 29,127    | 22.1 | 8  | 76.2 | 13.7 | 9.6  | 0.0  | 0.2  | 0.3  |
| Superior | CHOCOLAY R           | 10978 | 367    | 14,125  | 9  | 8,494   | 5,413   | 27,806    | 38.5 | 2  | 19.1 | 72.0 | 7.7  | 0.3  | 0.5  | 0.4  |
| Superior | MONTREAL R           | 10912 | 696    | 11,092  | 10 | 9       | 11,082  | 11,106    | 15.9 | 18 | 64.6 | 20.2 | 12.2 | 0.6  | 1.5  | 0.9  |
| Superior | BOIS BRULE R         | 10885 | 522    | 9,134   | 11 | 797     | 8,254   | 10,403    | 17.5 | 15 | 70.9 | 4.6  | 16.6 | 0.7  | 3.9  | 3.3  |
| Superior | FISH CR              | 10893 | 390    | 8,214   | 12 | 4,736   | 3,802   | 14,931    | 21.1 | 10 | 47.9 | 0.0  | 10.2 | 3.6  | 29.7 | 8.5  |
| Superior | AMNICON R            | 10882 | 343    | 8,111   | 13 | 4,753   | 3,464   | 14,387    | 23.6 | 5  | 82.0 | 0.1  | 7.0  | 1.1  | 5.9  | 3.9  |
| Superior | BRULE R              | 10811 | 691    | 7,486   | 14 | 4,581   | 2,911   | 15,523    | 10.8 | 29 | 98.4 | 0.0  | 1.5  | 0.0  | 0.0  | 0.0  |
| Superior | KNIFE R              | 10837 | 219    | 7,415   | 15 | 12      | 7,402   | 7,440     | 33.9 | 3  | 89.3 | 0.0  | 6.4  | 0.8  | 1.6  | 1.9  |
| Superior | IRON R               | 10888 | 388    | 6,795   | 16 | 3,924   | 1,992   | 13,056    | 17.5 | 14 | 49.2 | 20.5 | 15.6 | 1.2  | 10.2 | 3.3  |
| Superior | BEAVER R             | 10834 | 317    | 5,162   | 17 | 3,097   | 1,982   | 10,320    | 16.3 | 17 | 76.4 | 19.2 | 4.1  | 0.0  | 0.0  | 0.2  |
| Superior | TEMPERANCE R         | 10822 | 471    | 4,911   | 18 | 3,020   | 1,746   | 8,838     | 10.4 | 30 | 98.6 | 0.0  | 1.4  | 0.0  | 0.0  | 0.0  |
| Superior | WASKA R              | 11009 | 368    | 4,802   | 19 | 2,787   | 1,727   | 8,976     | 13.0 | 21 | 56.4 | 0.0  | 24.1 | 1.5  | 10.6 | 7.5  |
| Superior | IRON R               | 10923 | 264    | 4,692   | 20 | 2,806   | 1,709   | 11,794    | 17.7 | 13 | 92.5 | 2.2  | 5.2  | 0.0  | 0.0  | 0.2  |
| Superior | PIGEON R             | 10809 | 1,483  | 4,676   | 21 | 2,889   | 2,215   | 8,098     | 3.2  | 44 | 99.0 | 0.0  | 1.0  | 0.0  | 0.0  | 0.0  |
| Superior | BAPTISM R            | 10830 | 345    | 4,430   | 22 | 2,678   | 1,809   | 9,741     | 12.8 | 22 | 95.6 | 0.2  | 4.1  | 0.0  | 0.0  | 0.1  |
| Superior | PORTAGE L SHIP CANAL | 12320 | 182    | 4,203   | 23 | 2,449   | 1,391   | 7,912     | 23.1 | 7  | 31.4 | 36.7 | 28.7 | 0.7  | 1.7  | 0.8  |
| Superior | CARP R               | 10974 | 184    | 3,978   | 24 | 2,328   | 1,506   | 7,658     | 21.6 | 9  | 34.8 | 41.5 | 23.2 | 0.0  | 0.1  | 0.4  |
| Superior | POPLAR R             | 10819 | 287    | 3,537   | 25 | 2,152   | 1,457   | 6,317     | 12.3 | 24 | 97.8 | 0.0  | 2.1  | 0.0  | 0.0  | 0.0  |
| Superior | CASCADE R            | 10818 | 309    | 3,536   | 26 | 2,175   | 1,343   | 6,201     | 11.5 | 25 | 99.3 | 0.0  | 0.7  | 0.0  | 0.0  | 0.0  |
| Superior | TWO HEARTED R        | 10985 | 539    | 3,469   | 27 | 2,051   | 1,377   | 6,894     | 6.4  | 42 | 82.8 | 0.0  | 16.7 | 0.0  | 0.0  | 0.5  |
| Superior | FLINTSTEEL R         | 10947 | 160    | 3,127   | 28 | 1,834   | 1,219   | 5,970     | 19.5 | 11 | 85.3 | 0.0  | 9.6  | 0.4  | 2.5  | 2.2  |
| Superior | DEAD R               | 10973 | 424    | 3,017   | 29 | 1,773   | 1,206   | 5,996     | 7.1  | 38 | 71.2 | 0.0  | 27.9 | 0.0  | 0.0  | 0.8  |
| Superior | TOBACCO R            | 10953 | 154    | 2,794   | 30 | 1,657   | 897     | 5,280     | 18.2 | 12 | 92.7 | 0.0  | 7.3  | 0.0  | 0.0  | 0.0  |
| Superior | MANITOU R            | 10829 | 253    | 2,787   | 31 | 1,713   | 1,223   | 6,233     | 11.0 | 28 | 98.4 | 0.0  | 1.4  | 0.0  | 0.0  | 0.2  |
| Superior | GOOSEBERRY R         | 10835 | 198    | 2,730   | 32 | 1,650   | 1,004   | 5,563     | 13.8 | 19 | 96.2 | 0.0  | 3.5  | 0.0  | 0.0  | 0.2  |
| Superior | FIRESTEEL R          | 10948 | 233    | 2,426   | 33 | 1,431   | 909     | 4,387     | 10.4 | 31 | 85.3 | 0.0  | 13.0 | 0.1  | 0.6  | 0.9  |
| Superior | AU TRAIN R           | 12273 | 314    | 2,324   | 34 | 1,375   | 775     | 4,460     | 7.4  | 37 | 76.6 | 0.0  | 18.0 | 0.9  | 2.2  | 2.3  |
| Superior | SILVER R             | 10966 | 208    | 2,311   | 35 | 1,369   | 964     | 4,219     | 11.1 | 27 | 85.5 | 0.0  | 13.2 | 0.0  | 0.0  | 1.3  |
| Superior | HURON R              | 10968 | 217    | 2,211   | 36 | 1,301   | 824     | 3,750     | 10.2 | 32 | 84.4 | 0.0  | 15.0 | 0.0  | 0.0  | 0.6  |
| Superior | FLUTE REED CR        | 10810 | 172    | 2,179   | 37 | 1,332   | 909     | 4,187     | 12.7 | 23 | 98.5 | 0.0  | 1.5  | 0.0  | 0.0  | 0.0  |

|                               |                      |       |         |            |    |         |            |            |      |    |      |      |      |      |      |      |
|-------------------------------|----------------------|-------|---------|------------|----|---------|------------|------------|------|----|------|------|------|------|------|------|
| Superior                      | CROSS R              | 10825 | 196     | 1,966      | 38 | 1,205   | 629        | 3,464      | 10.0 | 33 | 97.9 | 0.0  | 2.0  | 0.0  | 0.0  | 0.1  |
| Superior                      | SIOUX R              | 10892 | 190     | 1,735      | 39 | 1,026   | 775        | 3,474      | 9.1  | 34 | 79.4 | 0.0  | 13.5 | 0.6  | 4.8  | 1.8  |
| Superior                      | BETSY R              | 10993 | 230     | 1,613      | 40 | 947     | 677        | 3,219      | 7.0  | 39 | 78.7 | 0.0  | 18.0 | 0.0  | 0.0  | 3.4  |
| Superior                      | DEVIL TRACK R        | 12302 | 193     | 1,489      | 41 | 900     | 600        | 3,085      | 7.7  | 36 | 94.7 | 0.0  | 5.2  | 0.0  | 0.0  | 0.1  |
| Superior                      | SUCKER R             | 10984 | 200     | 1,372      | 42 | 805     | 478        | 2,820      | 6.9  | 40 | 79.3 | 0.0  | 19.7 | 0.0  | 0.0  | 1.1  |
| Superior                      | YELLOW DOG R         | 12270 | 235     | 1,349      | 43 | 801     | 579        | 2,622      | 5.7  | 43 | 79.8 | 0.0  | 19.0 | 0.0  | 0.0  | 1.2  |
| Superior                      | LITTLE TWO HEARTED R | 10992 | 161     | 1,090      | 44 | 641     | 390        | 1,699      | 6.8  | 41 | 75.0 | 0.0  | 24.3 | 0.0  | 0.0  | 0.7  |
| Ohio River                    | OHIO R               | 90796 | 373,067 | 27,713,307 | 1  | 0       | 27,713,307 | 27,713,307 | 74.3 | 1  | 18.1 | 21.1 | 8.9  | 23.7 | 17.4 | 10.8 |
| Red River                     | RED R                | 38654 | 84,508  | 1,938,663  | 1  | 199,964 | 1,707,617  | 2,222,186  | 22.9 | 1  | 5.5  | 6.5  | 7.2  | 66.9 | 8.6  | 5.4  |
| Upper<br>Mississippi<br>River | MISSISSIPPI R        | 65695 | 446,475 | 31,359,903 | 1  | 0       | 31,359,903 | 31,359,903 | 70.2 | 1  | 4.5  | 21.0 | 6.3  | 30.0 | 30.6 | 7.6  |

Table S6\_TN. Total annual phosphorus and nitrogen loads and yields, with confidence intervals, for all tributaries to each lake with a drainage area greater than 150 square kilometers.

Tributaries to each Great Lake are ranked based on their relative loads and yields. A value of 1 indicates it has the largest load or relatively largest yield.

All loads and yields are adjusted to remove known spatial biases by only predicting areas that are not monitored. This results in very small standard errors and confidence intervals for basins for which a large percentage is monitored.

Supplemental Material to Robertson and Saad, 2011, Journal of the American Water Resources Association, Nutrient Inputs to the Laurentian Great Lakes By Source and River Basin Estimated Using SPARROW Watershed Models.

Yield is load per unit area of the HUC8 watershed.

[%, percent; CI, Confidence interval; kg, kilogram; km<sup>2</sup>, square kilometer]

| Great Lake/River Basin | River Name      | MRB Identification Number | Area (km <sup>2</sup> ) | Total Nitrogen Load (kg) | Total Nitrogen Load Rank | Standard Error in Nitrogen Load Estimate (kg) | Lower 95% CI Total Nitrogen Load (kg) | Upper 95% CI Total Nitrogen Load (kg) | Total Nitrogen Yield (kg/km <sup>2</sup> ) | Total Nitrogen Yield Rank | Percent Contribution by Source |               |                                 |                  |                   |
|------------------------|-----------------|---------------------------|-------------------------|--------------------------|--------------------------|-----------------------------------------------|---------------------------------------|---------------------------------------|--------------------------------------------|---------------------------|--------------------------------|---------------|---------------------------------|------------------|-------------------|
|                        |                 |                           |                         |                          |                          |                                               |                                       |                                       |                                            |                           | Atmosphere                     | Point sources | Additional agricultural sources | Farm fertilizers | Manure (confined) |
| Erie                   | MAUMEE R        | 11873                     | 16,948                  | 55,288,998               | 1                        | 2,486,356                                     | 53,879,475                            | 57,532,096                            | 3,262                                      | 8                         | 18.2                           | 6.4           | 23.9                            | 41.7             | 9.8               |
| Erie                   | SANDUSKY R      | 11898                     | 3,462                   | 14,421,976               | 2                        | 278,555                                       | 14,253,040                            | 14,745,849                            | 4,166                                      | 5                         | 19.3                           | 1.1           | 25.3                            | 46.6             | 7.7               |
| Erie                   | RIVER ROUGE     | 11782                     | 1,208                   | 11,558,685               | 3                        | 9,617,448                                     | 5,552,744                             | 24,286,857                            | 9,570                                      | 1                         | 2.6                            | 96.8          | 0.2                             | 0.3              | 0.1               |
| Erie                   | PORTAGE R       | 11892                     | 1,477                   | 6,549,270                | 4                        | 5,410,275                                     | 3,127,428                             | 11,151,006                            | 4,434                                      | 4                         | 20.2                           | 1.7           | 28.3                            | 46.8             | 2.9               |
| Erie                   | CUYAHOGA R      | 11920                     | 2,091                   | 5,410,101                | 5                        | 16,693                                        | 5,400,015                             | 5,420,583                             | 2,588                                      | 9                         | 13.5                           | 79.5          | 1.7                             | 3.8              | 1.5               |
| Erie                   | HURON R         | 11910                     | 1,078                   | 2,546,312                | 6                        | 252,339                                       | 2,385,240                             | 2,827,723                             | 2,362                                      | 10                        | 18.9                           | 6.0           | 25.0                            | 43.3             | 6.8               |
| Erie                   | TOUSSAINT CR    | 11891                     | 594                     | 2,452,507                | 7                        | 2,027,385                                     | 1,305,663                             | 4,582,105                             | 4,131                                      | 6                         | 20.1                           | 0.8           | 27.8                            | 48.9             | 2.4               |
| Erie                   | RIVER RAISIN    | 11795                     | 2,843                   | 2,388,661                | 8                        | 821                                           | 2,388,044                             | 2,389,217                             | 840                                        | 24                        | 23.4                           | 8.5           | 22.4                            | 35.9             | 9.8               |
| Erie                   | VERMILLION R    | 11913                     | 678                     | 2,334,837                | 9                        | 21,713                                        | 2,320,604                             | 2,358,055                             | 3,445                                      | 7                         | 21.4                           | 3.8           | 22.3                            | 41.8             | 10.7              |
| Erie                   | BLACK R         | 11753                     | 1,853                   | 2,215,948                | 10                       | 1,405                                         | 2,214,940                             | 2,216,606                             | 1,196                                      | 17                        | 25.8                           | 1.2           | 24.1                            | 35.2             | 13.8              |
| Erie                   | BLACK R         | 11914                     | 1,230                   | 1,621,687                | 11                       | 234,031                                       | 1,455,248                             | 1,799,470                             | 1,318                                      | 15                        | 25.0                           | 13.3          | 16.8                            | 33.7             | 11.3              |
| Erie                   | MUDDY CR        | 11897                     | 300                     | 1,479,006                | 12                       | 1,225,428                                     | 782,303                               | 2,927,418                             | 4,932                                      | 2                         | 18.5                           | 0.1           | 25.6                            | 52.1             | 3.7               |
| Erie                   | CLINTON R       | 12280                     | 2,570                   | 1,471,085                | 13                       | 338,301                                       | 1,238,600                             | 1,717,731                             | 572                                        | 29                        | 29.8                           | 53.3          | 6.3                             | 8.6              | 2.0               |
| Erie                   | HURON R         | 12520                     | 2,390                   | 1,466,475                | 14                       | 522,754                                       | 1,137,867                             | 2,004,475                             | 614                                        | 28                        | 25.2                           | 50.8          | 6.4                             | 13.8             | 3.8               |
| Erie                   | BUFFALO CR      | 11961                     | 1,167                   | 1,443,633                | 15                       | 910,097                                       | 936,157                               | 2,292,508                             | 1,237                                      | 16                        | 30.7                           | 28.1          | 6.9                             | 9.6              | 24.7              |
| Erie                   | CATTARAUGUS CR  | 11946                     | 1,449                   | 1,410,215                | 16                       | 245,044                                       | 1,251,671                             | 1,613,673                             | 973                                        | 20                        | 42.5                           | 3.7           | 14.3                            | 10.6             | 28.9              |
| Erie                   | GREEN CR        | 11909                     | 284                     | 1,332,869                | 17                       | 1,114,096                                     | 645,737                               | 2,296,066                             | 4,693                                      | 3                         | 18.7                           | 0.0           | 26.8                            | 49.9             | 4.6               |
| Erie                   | GRAND R         | 11931                     | 1,839                   | 1,255,984                | 18                       | 30,342                                        | 1,234,848                             | 1,287,959                             | 683                                        | 27                        | 40.3                           | 1.8           | 17.6                            | 27.4             | 13.0              |
| Erie                   | ROCKY R         | 11917                     | 756                     | 1,099,078                | 19                       | 126,717                                       | 1,021,248                             | 1,244,196                             | 1,454                                      | 14                        | 22.2                           | 57.3          | 5.3                             | 10.3             | 4.8               |
| Erie                   | OTTAWA CR       | 11794                     | 440                     | 899,434                  | 20                       | 742,944                                       | 437,157                               | 1,624,233                             | 2,045                                      | 11                        | 25.4                           | 8.2           | 20.8                            | 38.1             | 7.5               |
| Erie                   | BELLE R         | 11763                     | 577                     | 555,752                  | 21                       | 460,785                                       | 269,716                               | 1,065,162                             | 962                                        | 23                        | 31.8                           | 13.5          | 22.2                            | 25.4             | 7.1               |
| Erie                   | STONY CR        | 11793                     | 359                     | 541,525                  | 22                       | 450,836                                       | 256,751                               | 843,161                               | 1,509                                      | 13                        | 28.2                           | 3.0           | 22.3                            | 40.0             | 6.5               |
| Erie                   | CONNEAUT CR     | 11936                     | 487                     | 528,923                  | 23                       | 437,582                                       | 258,593                               | 834,424                               | 1,086                                      | 19                        | 42.6                           | 11.8          | 17.4                            | 12.5             | 15.8              |
| Erie                   | CHAGRIN R       | 11927                     | 673                     | 495,785                  | 24                       | 105,752                                       | 435,750                               | 576,583                               | 737                                        | 26                        | 41.4                           | 38.9          | 3.9                             | 12.4             | 3.4               |
| Erie                   | SWAN CR         | 11790                     | 281                     | 429,351                  | 25                       | 353,905                                       | 169,810                               | 691,572                               | 1,529                                      | 12                        | 27.4                           | 1.4           | 21.2                            | 46.2             | 3.7               |
| Erie                   | ASHTABULA R     | 11930                     | 361                     | 409,059                  | 26                       | 337,827                                       | 197,122                               | 626,101                               | 1,133                                      | 18                        | 41.0                           | 6.5           | 18.3                            | 19.4             | 14.7              |
| Erie                   | PINE R          | 11762                     | 470                     | 348,270                  | 27                       | 288,742                                       | 158,406                               | 613,861                               | 742                                        | 25                        | 42.2                           | 2.9           | 25.1                            | 24.3             | 5.5               |
| Erie                   | EIGHTEENMILE CR | 11959                     | 305                     | 295,696                  | 28                       | 243,614                                       | 125,864                               | 542,942                               | 970                                        | 21                        | 48.0                           | 0.0           | 13.4                            | 13.2             | 25.4              |
| Erie                   | ELK CR          | 11937                     | 251                     | 241,531                  | 29                       | 199,465                                       | 110,985                               | 407,502                               | 962                                        | 22                        | 50.2                           | 0.0           | 14.5                            | 19.5             | 15.8              |
| Huron                  | SAGINAW R       | 11747                     | 16,258                  | 11,852,946               | 1                        | 519,023                                       | 11,516,730                            | 12,315,865                            | 729                                        | 7                         | 25.8                           | 21.8          | 16.9                            | 27.6             | 7.8               |
| Huron                  | PINNEBOG R      | 11661                     | 462                     | 1,097,872                | 2                        | 917,128                                       | 560,845                               | 2,048,769                             | 2,374                                      | 3                         | 16.0                           | 1.7           | 20.3                            | 39.0             | 22.9              |
| Huron                  | PIGEON R        | 11660                     | 399                     | 1,033,268                | 3                        | 863,953                                       | 471,564                               | 1,765,658                             | 2,589                                      | 2                         | 15.7                           | 0.9           | 21.2                            | 39.6             | 22.7              |
| Huron                  | KAWKAWLIN R     | 11654                     | 576                     | 693,088                  | 4                        | 553,891                                       | 326,947                               | 1,162,843                             | 1,203                                      | 5                         | 29.1                           | 0.2           | 23.7                            | 43.4             | 3.6               |
| Huron                  | THUNDER BAY R   | 11606                     | 3,306                   | 673,503                  | 5                        | 552,981                                       | 368,302                               | 1,145,223                             | 204                                        | 15                        | 65.6                           | 6.9           | 7.9                             | 9.3              | 10.3              |
| Huron                  | WILLOW R        | 11664                     | 263                     | 497,173                  | 6                        | 398,380                                       | 220,987                               | 910,536                               | 1,888                                      | 4                         | 17.1                           | 0.0           | 19.7                            | 39.8             | 23.4              |



|          |                  |       |         |            |    |           |            |            |       |    |      |      |      |      |      |
|----------|------------------|-------|---------|------------|----|-----------|------------|------------|-------|----|------|------|------|------|------|
| Huron    | AU GRES R        | 11647 | 745     | 465,769    | 7  | 381,542   | 261,628    | 897,531    | 625   | 8  | 42.1 | 3.3  | 13.5 | 23.1 | 17.9 |
| Huron    | WISCOGGIN DRAIN  | 11659 | 167     | 440,564    | 8  | 357,430   | 211,204    | 703,350    | 2,640 | 1  | 18.5 | 0.0  | 28.2 | 44.6 | 8.8  |
| Huron    | AU SABLE R       | 11619 | 5,265   | 390,518    | 9  | 105,325   | 320,354    | 485,465    | 74    | 19 | 88.2 | 2.3  | 3.2  | 2.5  | 3.8  |
| Huron    | RIFLE R          | 11652 | 972     | 376,283    | 10 | 312,708   | 204,926    | 688,232    | 387   | 10 | 54.5 | 6.3  | 7.6  | 15.3 | 16.3 |
| Huron    | CHEBOYGAN R      | 11593 | 3,900   | 281,271    | 11 | 234,307   | 127,668    | 470,752    | 72    | 20 | 78.9 | 0.6  | 10.1 | 4.7  | 5.6  |
| Huron    | MUNUSCONG R      | 12285 | 633     | 241,153    | 12 | 200,320   | 126,473    | 521,250    | 381   | 11 | 62.0 | 7.0  | 20.9 | 1.7  | 8.4  |
| Huron    | PINE R, N BR     | 11658 | 255     | 239,598    | 13 | 200,840   | 108,540    | 365,578    | 940   | 6  | 34.6 | 1.0  | 17.7 | 37.7 | 9.0  |
| Huron    | PINE R           | 11578 | 739     | 196,334    | 14 | 161,358   | 110,842    | 349,353    | 266   | 13 | 77.2 | 5.8  | 12.4 | 0.8  | 3.8  |
| Huron    | WHITNEY DRAIN    | 11643 | 374     | 134,930    | 15 | 113,186   | 67,138     | 194,500    | 360   | 12 | 59.7 | 2.7  | 8.2  | 15.0 | 14.4 |
| Huron    | OCQUEOC R        | 11584 | 361     | 82,770     | 16 | 69,902    | 39,252     | 146,832    | 229   | 14 | 75.8 | 0.0  | 8.1  | 11.0 | 5.1  |
| Huron    | CHARLOTTE R      | 12284 | 152     | 80,826     | 17 | 67,830    | 36,012     | 161,474    | 533   | 9  | 51.3 | 0.0  | 35.8 | 2.4  | 10.5 |
| Huron    | SILVER CR        | 11640 | 385     | 77,701     | 18 | 62,770    | 37,589     | 133,586    | 202   | 16 | 59.4 | 18.9 | 4.7  | 7.3  | 9.8  |
| Huron    | CARP R           | 11583 | 396     | 73,017     | 19 | 61,591    | 33,150     | 137,117    | 185   | 18 | 96.5 | 0.0  | 2.1  | 0.2  | 1.2  |
| Huron    | LONG L CR        | 11588 | 176     | 34,923     | 20 | 28,800    | 18,788     | 90,211     | 198   | 17 | 68.3 | 0.0  | 6.2  | 16.8 | 8.8  |
| Michigan | GRAND R          | 11412 | 14,205  | 12,709,791 | 1  | 920,113   | 12,165,239 | 13,509,185 | 895   | 14 | 25.2 | 15.3 | 15.8 | 25.9 | 17.8 |
| Michigan | ST JOSEPH R      | 11271 | 12,196  | 10,613,665 | 2  | 22        | 10,613,645 | 10,613,680 | 870   | 16 | 24.5 | 10.1 | 18.9 | 30.7 | 15.8 |
| Michigan | FOX R            | 11232 | 16,459  | 6,283,337  | 3  | 5         | 6,283,333  | 6,283,341  | 382   | 26 | 21.4 | 20.6 | 15.1 | 17.3 | 25.6 |
| Michigan | KALAMAZOO R      | 11343 | 5,249   | 4,847,824  | 4  | 2,930,430 | 2,971,536  | 7,085,705  | 924   | 13 | 24.4 | 17.3 | 13.0 | 22.2 | 23.1 |
| Michigan | MUSKEGON R       | 11488 | 7,047   | 2,714,116  | 5  | 2,233,385 | 1,261,471  | 5,203,536  | 385   | 25 | 51.5 | 2.9  | 12.3 | 14.7 | 18.6 |
| Michigan | MENOMINEE R      | 11104 | 10,525  | 1,631,808  | 6  | 174,885   | 1,517,113  | 1,780,762  | 155   | 50 | 71.3 | 10.0 | 7.3  | 4.3  | 7.1  |
| Michigan | MANISTEE R       | 11515 | 5,046   | 1,263,383  | 7  | 429,133   | 989,226    | 1,729,879  | 250   | 33 | 66.8 | 16.2 | 8.6  | 4.8  | 3.5  |
| Michigan | PORTAGE R        | 11247 | 904.4   | 1,135,200  | 8  | 606,211   | 797,228    | 1,561,714  | 1,255 | 7  | 32.1 | 25.6 | 14.8 | 25.2 | 2.3  |
| Michigan | SHEBOYGAN R      | 11027 | 1,112   | 1,045,669  | 9  | 86,671    | 986,327    | 1,131,680  | 941   | 12 | 19.3 | 11.8 | 17.0 | 17.3 | 34.6 |
| Michigan | MANITOWOC R      | 11019 | 1,395   | 1,018,487  | 10 | 138,432   | 927,122    | 1,138,686  | 730   | 20 | 16.2 | 15.3 | 12.8 | 14.7 | 41.0 |
| Michigan | MANISTIQUE R     | 11543 | 3,778   | 946,169    | 11 | 75        | 946,109    | 946,223    | 250   | 32 | 91.6 | 5.3  | 1.5  | 0.9  | 0.7  |
| Michigan | MILWAUKEE R      | 11260 | 2,260   | 921,389    | 12 | 413       | 921,079    | 921,722    | 408   | 24 | 26.8 | 22.9 | 13.3 | 13.7 | 23.3 |
| Michigan | BLACK R          | 11332 | 666     | 691,519    | 13 | 564,988   | 278,768    | 1,064,923  | 1,039 | 9  | 29.8 | 2.8  | 18.6 | 25.5 | 23.2 |
| Michigan | ROOT R           | 11258 | 506     | 684,502    | 14 | 65,346    | 642,240    | 719,580    | 1,352 | 4  | 28.4 | 14.6 | 23.4 | 23.4 | 10.2 |
| Michigan | PESHTIGO R       | 11061 | 2,937   | 649,626    | 15 | 35,666    | 627,827    | 673,464    | 221   | 40 | 51.6 | 5.6  | 13.6 | 10.5 | 18.8 |
| Michigan | WHITE R          | 90615 | 1,373   | 617,152    | 16 | 509,406   | 290,971    | 1,231,040  | 449   | 23 | 48.1 | 8.4  | 11.8 | 18.6 | 13.1 |
| Michigan | W TWIN R         | 11016 | 444     | 612,743    | 17 | 509,237   | 257,651    | 933,182    | 1,382 | 3  | 18.8 | 2.3  | 8.0  | 17.2 | 53.7 |
| Michigan | OCONTO R         | 11051 | 2,558   | 585,350    | 18 | 15,804    | 575,538    | 600,014    | 229   | 36 | 38.3 | 5.5  | 14.8 | 14.8 | 26.5 |
| Michigan | BLACK CR         | 11467 | 387     | 569,619    | 19 | 465,555   | 284,045    | 1,046,787  | 1,470 | 2  | 15.6 | 61.6 | 7.0  | 7.1  | 8.7  |
| Michigan | PERE MARQUETTE R | 11477 | 2,002   | 527,281    | 20 | 138,304   | 444,050    | 701,342    | 263   | 31 | 57.6 | 11.0 | 11.6 | 12.0 | 7.8  |
| Michigan | ESCANABA R       | 11141 | 2,389   | 463,985    | 21 | 385,918   | 258,981    | 789,513    | 194   | 43 | 83.1 | 5.4  | 4.7  | 3.0  | 3.8  |
| Michigan | E TWIN R         | 11015 | 345     | 452,662    | 22 | 370,844   | 229,671    | 787,884    | 1,313 | 6  | 19.4 | 7.0  | 7.8  | 17.2 | 48.5 |
| Michigan | KEWAUNEE R       | 11040 | 357     | 431,358    | 23 | 42,761    | 406,982    | 456,384    | 1,209 | 8  | 16.5 | 2.8  | 7.6  | 19.4 | 53.7 |
| Michigan | PIGEON R         | 11026 | 216     | 399,134    | 24 | 321,634   | 211,594    | 618,111    | 1,848 | 1  | 19.2 | 1.6  | 18.5 | 17.8 | 42.9 |
| Michigan | GALIEN R         | 11253 | 464     | 378,069    | 25 | 294,428   | 229,036    | 637,288    | 816   | 17 | 32.5 | 9.8  | 20.6 | 30.5 | 6.6  |
| Michigan | PENSAUKEE R      | 11045 | 379     | 332,728    | 26 | 276,598   | 152,196    | 596,837    | 877   | 15 | 23.2 | 0.3  | 17.6 | 18.6 | 40.2 |
| Michigan | PENTWATER R      | 11472 | 414     | 304,648    | 27 | 253,264   | 170,864    | 517,910    | 736   | 19 | 35.2 | 2.9  | 19.5 | 32.4 | 10.0 |
| Michigan | AHNAPEE R        | 11037 | 302     | 302,465    | 28 | 248,363   | 147,713    | 522,767    | 1,001 | 11 | 22.2 | 3.8  | 8.8  | 20.2 | 44.9 |
| Michigan | MACATAWA R       | 11337 | 218     | 290,171    | 29 | 235,336   | 126,648    | 534,506    | 1,333 | 5  | 18.4 | 1.0  | 15.4 | 24.9 | 40.3 |
| Michigan | FORD R           | 11131 | 1,232   | 277,728    | 30 | 233,011   | 135,071    | 475,876    | 225   | 38 | 83.6 | 0.8  | 6.6  | 3.9  | 5.1  |
| Michigan | CEDAR R          | 11137 | 973     | 276,491    | 31 | 230,103   | 150,954    | 504,772    | 284   | 28 | 63.5 | 4.4  | 9.4  | 7.3  | 15.4 |
| Michigan | DUCK CR          | 11050 | 391     | 272,986    | 32 | 46,503    | 240,555    | 309,688    | 698   | 21 | 19.9 | 1.0  | 18.3 | 19.8 | 41.0 |
| Michigan | BOARDMAN R       | 11533 | 730     | 260,328    | 33 | 217,224   | 115,628    | 409,681    | 357   | 27 | 58.6 | 23.9 | 8.8  | 6.2  | 2.6  |
| Michigan | SAUMICO R        | 11049 | 211     | 213,928    | 34 | 173,192   | 117,204    | 368,173    | 1,013 | 10 | 17.5 | 4.1  | 17.0 | 16.4 | 45.0 |
| Michigan | JORDAN/BOYNE R   | 11538 | 904.8   | 169,390    | 35 | 138,221   | 85,824     | 240,745    | 187   | 46 | 57.3 | 10.4 | 17.5 | 8.3  | 6.5  |
| Michigan | BETSIE R         | 11526 | 610     | 165,632    | 36 | 139,477   | 71,897     | 290,045    | 272   | 30 | 82.7 | 0.2  | 9.8  | 4.8  | 2.5  |
| Michigan | WHITEFISH R      | 11152 | 818     | 160,533    | 37 | 133,229   | 82,969     | 298,775    | 196   | 42 | 91.8 | 0.0  | 3.3  | 2.0  | 3.0  |
| Michigan | ELK R            | 12398 | 1,297.4 | 159,056    | 38 | 126,898   | 72,295     | 295,109    | 123   | 51 | 63.1 | 4.0  | 15.1 | 13.3 | 4.4  |
| Michigan | LITTLE SUAMICO R | 11048 | 186     | 147,179    | 39 | 119,051   | 78,506     | 287,379    | 793   | 18 | 21.9 | 0.0  | 19.4 | 18.9 | 39.7 |

|          |                      |       |        |           |    |           |           |            |       |    |       |      |      |      |      |
|----------|----------------------|-------|--------|-----------|----|-----------|-----------|------------|-------|----|-------|------|------|------|------|
| Michigan | LINCOLN R            | 11484 | 278    | 144,301   | 40 | 117,500   | 72,360    | 238,195    | 518   | 22 | 50.2  | 0.0  | 18.0 | 19.6 | 12.2 |
| Michigan | STURGEON R           | 11164 | 572    | 100,869   | 41 | 85,505    | 40,166    | 178,020    | 176   | 48 | 99.0  | 0.0  | 0.5  | 0.3  | 0.3  |
| Michigan | CEDAR R              | 12396 | 331.3  | 93,890    | 42 | 76,486    | 43,170    | 194,768    | 283   | 29 | 52.2  | 0.0  | 18.7 | 23.2 | 5.9  |
| Michigan | PLATTE R             | 12403 | 494    | 93,406    | 43 | 76,095    | 48,607    | 144,840    | 189   | 45 | 72.9  | 6.6  | 10.3 | 7.3  | 2.9  |
| Michigan | BIG SABLE R          | 11487 | 466    | 89,642    | 44 | 73,109    | 43,457    | 181,630    | 192   | 44 | 74.4  | 0.0  | 9.6  | 9.8  | 6.2  |
| Michigan | RAPID R              | 11159 | 347    | 79,258    | 45 | 66,671    | 35,027    | 123,268    | 229   | 37 | 89.0  | 0.0  | 5.2  | 2.8  | 3.0  |
| Michigan | BEAR R               | 11541 | 295    | 68,921    | 46 | 57,943    | 34,772    | 124,167    | 234   | 34 | 71.0  | 0.0  | 16.1 | 5.4  | 7.5  |
| Michigan | MILLECOQUINS R       | 11564 | 273    | 63,407    | 47 | 52,725    | 34,740    | 121,033    | 232   | 35 | 79.5  | 0.0  | 8.8  | 1.6  | 10.1 |
| Michigan | FISHDAM R            | 11163 | 256    | 50,614    | 48 | 41,433    | 27,969    | 97,370     | 197   | 41 | 78.3  | 0.0  | 11.6 | 5.6  | 4.6  |
| Michigan | CARP LAKE R          | 11542 | 155    | 34,200    | 49 | 28,831    | 17,649    | 66,031     | 221   | 39 | 75.3  | 0.0  | 12.4 | 4.7  | 7.5  |
| Michigan | DAYS R               | 11161 | 158    | 29,467    | 50 | 24,042    | 14,372    | 52,415     | 187   | 47 | 90.2  | 0.0  | 4.6  | 2.5  | 2.7  |
| Michigan | MILAKOKIA R          | 11565 | 174.0  | 29,234    | 51 | 24,195    | 13,431    | 43,426     | 168   | 49 | 99.5  | 0.0  | 0.3  | 0.0  | 0.2  |
| Michigan | BREVOORT R           | 11563 | 234    | 16,311    | 52 | 13,035    | 7,483     | 26,392     | 70    | 52 | 98.3  | 0.0  | 0.9  | 0.1  | 0.7  |
| Ontario  | OSWEGO R             | 12147 | 13,182 | 9,400,412 | 1  | 7,528,976 | 5,253,829 | 14,776,564 | 713   | 12 | 34.7  | 23.7 | 9.8  | 11.8 | 20.0 |
| Ontario  | GENESEE R            | 12065 | 6,431  | 4,824,705 | 2  | 2,973,254 | 2,831,217 | 7,962,136  | 750   | 8  | 31.2  | 7.3  | 13.4 | 15.5 | 32.6 |
| Ontario  | BLACK R              | 12152 | 4,888  | 3,560,858 | 3  | 142,272   | 3,462,800 | 3,663,894  | 729   | 9  | 63.2  | 4.6  | 4.0  | 5.0  | 23.1 |
| Ontario  | TONAWANDA CR         | 11978 | 1,735  | 2,275,496 | 4  | 1,876,724 | 1,150,017 | 4,396,226  | 1,312 | 2  | 27.0  | 26.0 | 9.1  | 12.8 | 25.2 |
| Ontario  | OAK ORCHARD CR       | 11999 | 574    | 586,130   | 5  | 481,166   | 286,878   | 1,056,950  | 1,021 | 6  | 29.9  | 6.3  | 20.8 | 24.0 | 19.0 |
| Ontario  | SALMON R             | 12099 | 690    | 561,979   | 6  | 461,137   | 283,971   | 974,429    | 814   | 7  | 91.1  | 3.7  | 1.2  | 1.4  | 2.5  |
| Ontario  | SANDY CR             | 12111 | 395    | 530,630   | 7  | 438,714   | 283,759   | 999,470    | 1,345 | 1  | 51.6  | 1.7  | 10.7 | 6.0  | 29.9 |
| Ontario  | PERCH R              | 12564 | 252    | 304,169   | 8  | 248,973   | 132,949   | 555,998    | 1,208 | 4  | 50.2  | 0.0  | 5.0  | 7.4  | 37.4 |
| Ontario  | EIGHTEENMILE CR      | 11994 | 238    | 294,805   | 9  | 234,340   | 150,889   | 580,105    | 1,239 | 3  | 22.1  | 46.0 | 12.0 | 11.0 | 8.9  |
| Ontario  | S SANDY CR           | 12108 | 270    | 294,386   | 10 | 242,374   | 110,749   | 496,483    | 1,091 | 5  | 74.4  | 0.0  | 5.3  | 3.4  | 16.9 |
| Ontario  | LITTLE SALMON R      | 12098 | 242    | 175,682   | 11 | 146,657   | 82,035    | 309,837    | 727   | 10 | 81.9  | 3.9  | 2.9  | 4.2  | 7.1  |
| Ontario  | JOHNSON CR           | 11996 | 245    | 173,995   | 12 | 143,034   | 78,931    | 286,056    | 711   | 13 | 36.2  | 3.4  | 22.8 | 25.8 | 11.8 |
| Ontario  | STERLING CR          | 12095 | 209    | 151,498   | 13 | 122,557   | 73,750    | 247,421    | 727   | 11 | 42.7  | 0.0  | 11.8 | 15.7 | 29.8 |
| Ontario  | IRONDEQUOIT CR       | 12546 | 440    | 137,746   | 14 | 20,076    | 124,526   | 150,350    | 313   | 15 | 62.9  | 0.0  | 9.4  | 17.5 | 10.3 |
| Ontario  | WEST CR              | 12006 | 208    | 98,062    | 15 | 79,054    | 44,191    | 166,370    | 472   | 14 | 50.2  | 0.0  | 20.0 | 21.6 | 8.2  |
| Superior | ST LOUIS R           | 12311 | 9,409  | 2,616,997 | 1  | 65,233    | 2,576,939 | 2,663,917  | 278   | 8  | 84.2  | 10.3 | 1.1  | 1.7  | 2.7  |
| Superior | ONTONAGON R          | 10928 | 3,620  | 741,966   | 2  | 25,339    | 723,725   | 757,960    | 205   | 17 | 86.6  | 0.9  | 9.0  | 0.7  | 2.8  |
| Superior | WHITE R              | 10897 | 2,488  | 601,522   | 3  | 2,174     | 600,150   | 603,430    | 242   | 11 | 84.8  | 1.1  | 3.3  | 2.5  | 8.2  |
| Superior | TAHQAMENON R         | 10994 | 2,138  | 404,031   | 4  | 337,901   | 226,119   | 747,649    | 189   | 21 | 94.9  | 3.7  | 0.5  | 0.6  | 0.3  |
| Superior | NEMADJI R            | 10877 | 1,199  | 399,221   | 5  | 18,802    | 386,504   | 411,051    | 333   | 5  | 87.5  | 0.4  | 1.8  | 2.5  | 7.9  |
| Superior | PORTAGE R            | 12321 | 2,349  | 353,884   | 6  | 289,213   | 148,571   | 641,620    | 151   | 28 | 80.8  | 7.4  | 7.2  | 1.6  | 2.9  |
| Superior | PRESQUE ISLE R       | 10918 | 962    | 169,111   | 7  | 140,033   | 88,661    | 243,636    | 176   | 23 | 97.0  | 2.7  | 0.2  | 0.1  | 0.0  |
| Superior | BLACK R              | 10915 | 669    | 167,186   | 8  | 139,548   | 99,095    | 311,411    | 250   | 9  | 78.0  | 17.2 | 4.3  | 0.1  | 0.4  |
| Superior | MONTREAL R           | 10912 | 696    | 166,633   | 9  | 136,548   | 78,059    | 302,560    | 240   | 12 | 66.0  | 22.5 | 8.8  | 1.0  | 1.6  |
| Superior | PIGEON R             | 10809 | 1,483  | 141,307   | 10 | 115,967   | 76,177    | 279,051    | 95    | 44 | 100.0 | 0.0  | 0.0  | 0.0  | 0.0  |
| Superior | FISH CR              | 10893 | 390    | 138,533   | 11 | 114,163   | 56,168    | 264,367    | 355   | 1  | 69.4  | 0.0  | 4.3  | 4.3  | 21.9 |
| Superior | IRON R               | 10888 | 388    | 129,182   | 12 | 105,852   | 57,559    | 225,175    | 333   | 4  | 80.4  | 3.6  | 1.5  | 2.4  | 12.2 |
| Superior | WAIKA R              | 11009 | 368    | 129,071   | 13 | 108,087   | 65,990    | 210,732    | 350   | 2  | 66.0  | 0.0  | 25.3 | 1.6  | 7.1  |
| Superior | AMNICON R            | 10882 | 343    | 116,866   | 14 | 97,575    | 56,958    | 205,772    | 340   | 3  | 92.4  | 0.0  | 1.4  | 1.6  | 4.6  |
| Superior | BOIS BRULE R         | 10885 | 522    | 101,175   | 15 | 15,437    | 90,765    | 116,762    | 194   | 20 | 91.9  | 2.3  | 1.0  | 1.2  | 3.6  |
| Superior | TWO HEARTED R        | 10985 | 539    | 81,994    | 16 | 67,041    | 39,299    | 121,745    | 152   | 27 | 100.0 | 0.0  | 0.0  | 0.0  | 0.0  |
| Superior | BRULE R              | 10811 | 691    | 79,142    | 17 | 65,411    | 33,638    | 124,592    | 114   | 40 | 100.0 | 0.0  | 0.0  | 0.0  | 0.0  |
| Superior | CHOCOLAY R           | 10978 | 367    | 75,558    | 18 | 63,304    | 34,099    | 113,618    | 206   | 16 | 80.6  | 13.3 | 2.0  | 1.6  | 2.4  |
| Superior | KNIFE R              | 10837 | 219    | 69,187    | 19 | 274       | 68,946    | 69,444     | 316   | 6  | 96.6  | 0.0  | 0.3  | 1.3  | 1.8  |
| Superior | TEMPERANCE R         | 10822 | 471    | 60,989    | 20 | 51,191    | 28,440    | 86,181     | 130   | 36 | 100.0 | 0.0  | 0.0  | 0.0  | 0.0  |
| Superior | IRON R               | 10923 | 264    | 60,120    | 21 | 49,277    | 31,889    | 107,786    | 227   | 14 | 98.9  | 1.1  | 0.0  | 0.0  | 0.0  |
| Superior | PORTAGE L SHIP CANAL | 12320 | 182    | 53,960    | 22 | 44,720    | 29,086    | 87,676     | 297   | 7  | 47.4  | 43.4 | 5.1  | 1.7  | 2.4  |
| Superior | DEAD R               | 10973 | 424    | 50,922    | 23 | 42,087    | 25,385    | 89,800     | 120   | 39 | 99.8  | 0.0  | 0.1  | 0.0  | 0.1  |
| Superior | BETSY R              | 10993 | 230    | 46,471    | 24 | 39,290    | 20,379    | 74,530     | 202   | 18 | 100.0 | 0.0  | 0.0  | 0.0  | 0.0  |
| Superior | FIRESTEEL R          | 10948 | 233    | 46,039    | 25 | 38,727    | 17,595    | 73,201     | 198   | 19 | 96.3  | 0.0  | 2.7  | 0.2  | 0.8  |

|                         |                      |       |         |             |    |           |             |             |       |    |       |      |      |      |      |
|-------------------------|----------------------|-------|---------|-------------|----|-----------|-------------|-------------|-------|----|-------|------|------|------|------|
| Superior                | CARP R               | 10974 | 184     | 45,684      | 26 | 37,141    | 20,457      | 86,879      | 248   | 10 | 56.0  | 43.5 | 0.2  | 0.1  | 0.2  |
| Superior                | BAPTISM R            | 10830 | 345     | 44,855      | 27 | 37,049    | 20,460      | 88,723      | 130   | 35 | 99.4  | 0.3  | 0.2  | 0.1  | 0.0  |
| Superior                | SIoux R              | 10892 | 190     | 42,495      | 28 | 35,530    | 22,499      | 65,485      | 223   | 15 | 93.2  | 0.0  | 0.6  | 1.0  | 5.2  |
| Superior                | BEAVER R             | 10834 | 317     | 42,446      | 29 | 34,751    | 22,571      | 85,750      | 134   | 32 | 99.1  | 0.6  | 0.2  | 0.1  | 0.0  |
| Superior                | CASCADE R            | 10818 | 309     | 42,130      | 30 | 35,266    | 17,468      | 68,472      | 137   | 31 | 99.9  | 0.0  | 0.0  | 0.0  | 0.0  |
| Superior                | AU TRAIN R           | 12273 | 314     | 41,376      | 31 | 33,533    | 19,681      | 67,462      | 132   | 33 | 94.8  | 0.0  | 2.0  | 1.2  | 2.0  |
| Superior                | SILVER R             | 10966 | 208     | 39,007      | 32 | 32,824    | 18,109      | 69,587      | 187   | 22 | 99.8  | 0.0  | 0.2  | 0.0  | 0.0  |
| Superior                | POPLAR R             | 10819 | 287     | 37,420      | 33 | 30,654    | 16,799      | 66,779      | 131   | 34 | 100.0 | 0.0  | 0.0  | 0.0  | 0.0  |
| Superior                | FLINTSTEEL R         | 10947 | 160     | 36,484      | 34 | 30,555    | 18,327      | 63,138      | 228   | 13 | 87.8  | 0.0  | 8.5  | 0.8  | 3.0  |
| Superior                | SUCKER R             | 10984 | 200     | 33,866      | 35 | 28,924    | 16,215      | 48,638      | 169   | 25 | 100.0 | 0.0  | 0.0  | 0.0  | 0.0  |
| Superior                | HURON R              | 10968 | 217     | 32,369      | 36 | 26,596    | 16,736      | 61,387      | 149   | 29 | 99.9  | 0.0  | 0.1  | 0.0  | 0.0  |
| Superior                | MANITOU R            | 10829 | 253     | 32,073      | 37 | 26,926    | 17,022      | 50,366      | 127   | 37 | 99.2  | 0.0  | 0.7  | 0.1  | 0.0  |
| Superior                | GOOSEBERRY R         | 10835 | 198     | 28,427      | 38 | 23,204    | 10,495      | 47,139      | 144   | 30 | 99.8  | 0.0  | 0.1  | 0.1  | 0.0  |
| Superior                | LITTLE TWO HEARTED R | 10992 | 161     | 27,470      | 39 | 22,415    | 13,700      | 49,158      | 171   | 24 | 100.0 | 0.0  | 0.0  | 0.0  | 0.0  |
| Superior                | YELLOW DOG R         | 12270 | 235     | 25,534      | 40 | 21,119    | 13,072      | 43,257      | 108   | 41 | 99.8  | 0.0  | 0.1  | 0.0  | 0.1  |
| Superior                | CROSS R              | 10825 | 196     | 24,196      | 41 | 20,102    | 11,344      | 36,909      | 123   | 38 | 100.0 | 0.0  | 0.0  | 0.0  | 0.0  |
| Superior                | TOBACCO R            | 10953 | 154     | 23,921      | 42 | 20,216    | 11,012      | 34,747      | 155   | 26 | 100.0 | 0.0  | 0.0  | 0.0  | 0.0  |
| Superior                | FLUTE REED CR        | 10810 | 172     | 18,517      | 43 | 15,181    | 8,319       | 28,618      | 108   | 42 | 100.0 | 0.0  | 0.0  | 0.0  | 0.0  |
| Superior                | DEVIL TRACK R        | 12302 | 193     | 18,379      | 44 | 14,614    | 8,818       | 39,194      | 95    | 43 | 99.3  | 0.0  | 0.5  | 0.1  | 0.0  |
| Ohio River              | OHIO R               | 90796 | 373,067 | 357,231,370 | 1  | 0         | 357,231,370 | 357,231,370 | 958   | 1  | 35.2  | 12.8 | 14.3 | 27.3 | 10.4 |
| Red River               | RED R                | 38654 | 84,508  | 14,197,391  | 1  | 4,556,073 | 11,154,530  | 18,749,404  | 168   | 1  | 16.0  | 3.3  | 35.6 | 42.9 | 2.2  |
| Upper Mississippi River | MISSISSIPPI R        | 65695 | 446,475 | 479,811,492 | 1  | 0         | 479,811,492 | 479,811,492 | 1,075 | 1  | 19.4  | 7.9  | 20.5 | 35.1 | 17.2 |
